# Supplementary material for: Identification of novel candidate neural genes for diet-induced obesity in outbred heterogeneous stock rats
Source: Research Square preprint supplement (doi:10.21203/rs.3.rs-9695368/v1), 2026-05-22

## **Supplemental Figures**

Supplemental Figure 1. Phenotypic and genetic correlations with associated p-values.

Supplemental Figure 2. BmediatR results showing complete mediation (dark green), partial mediation (light green), co-localization (light blue) or other non-mediation (grey)

### Females on High Fat Diet

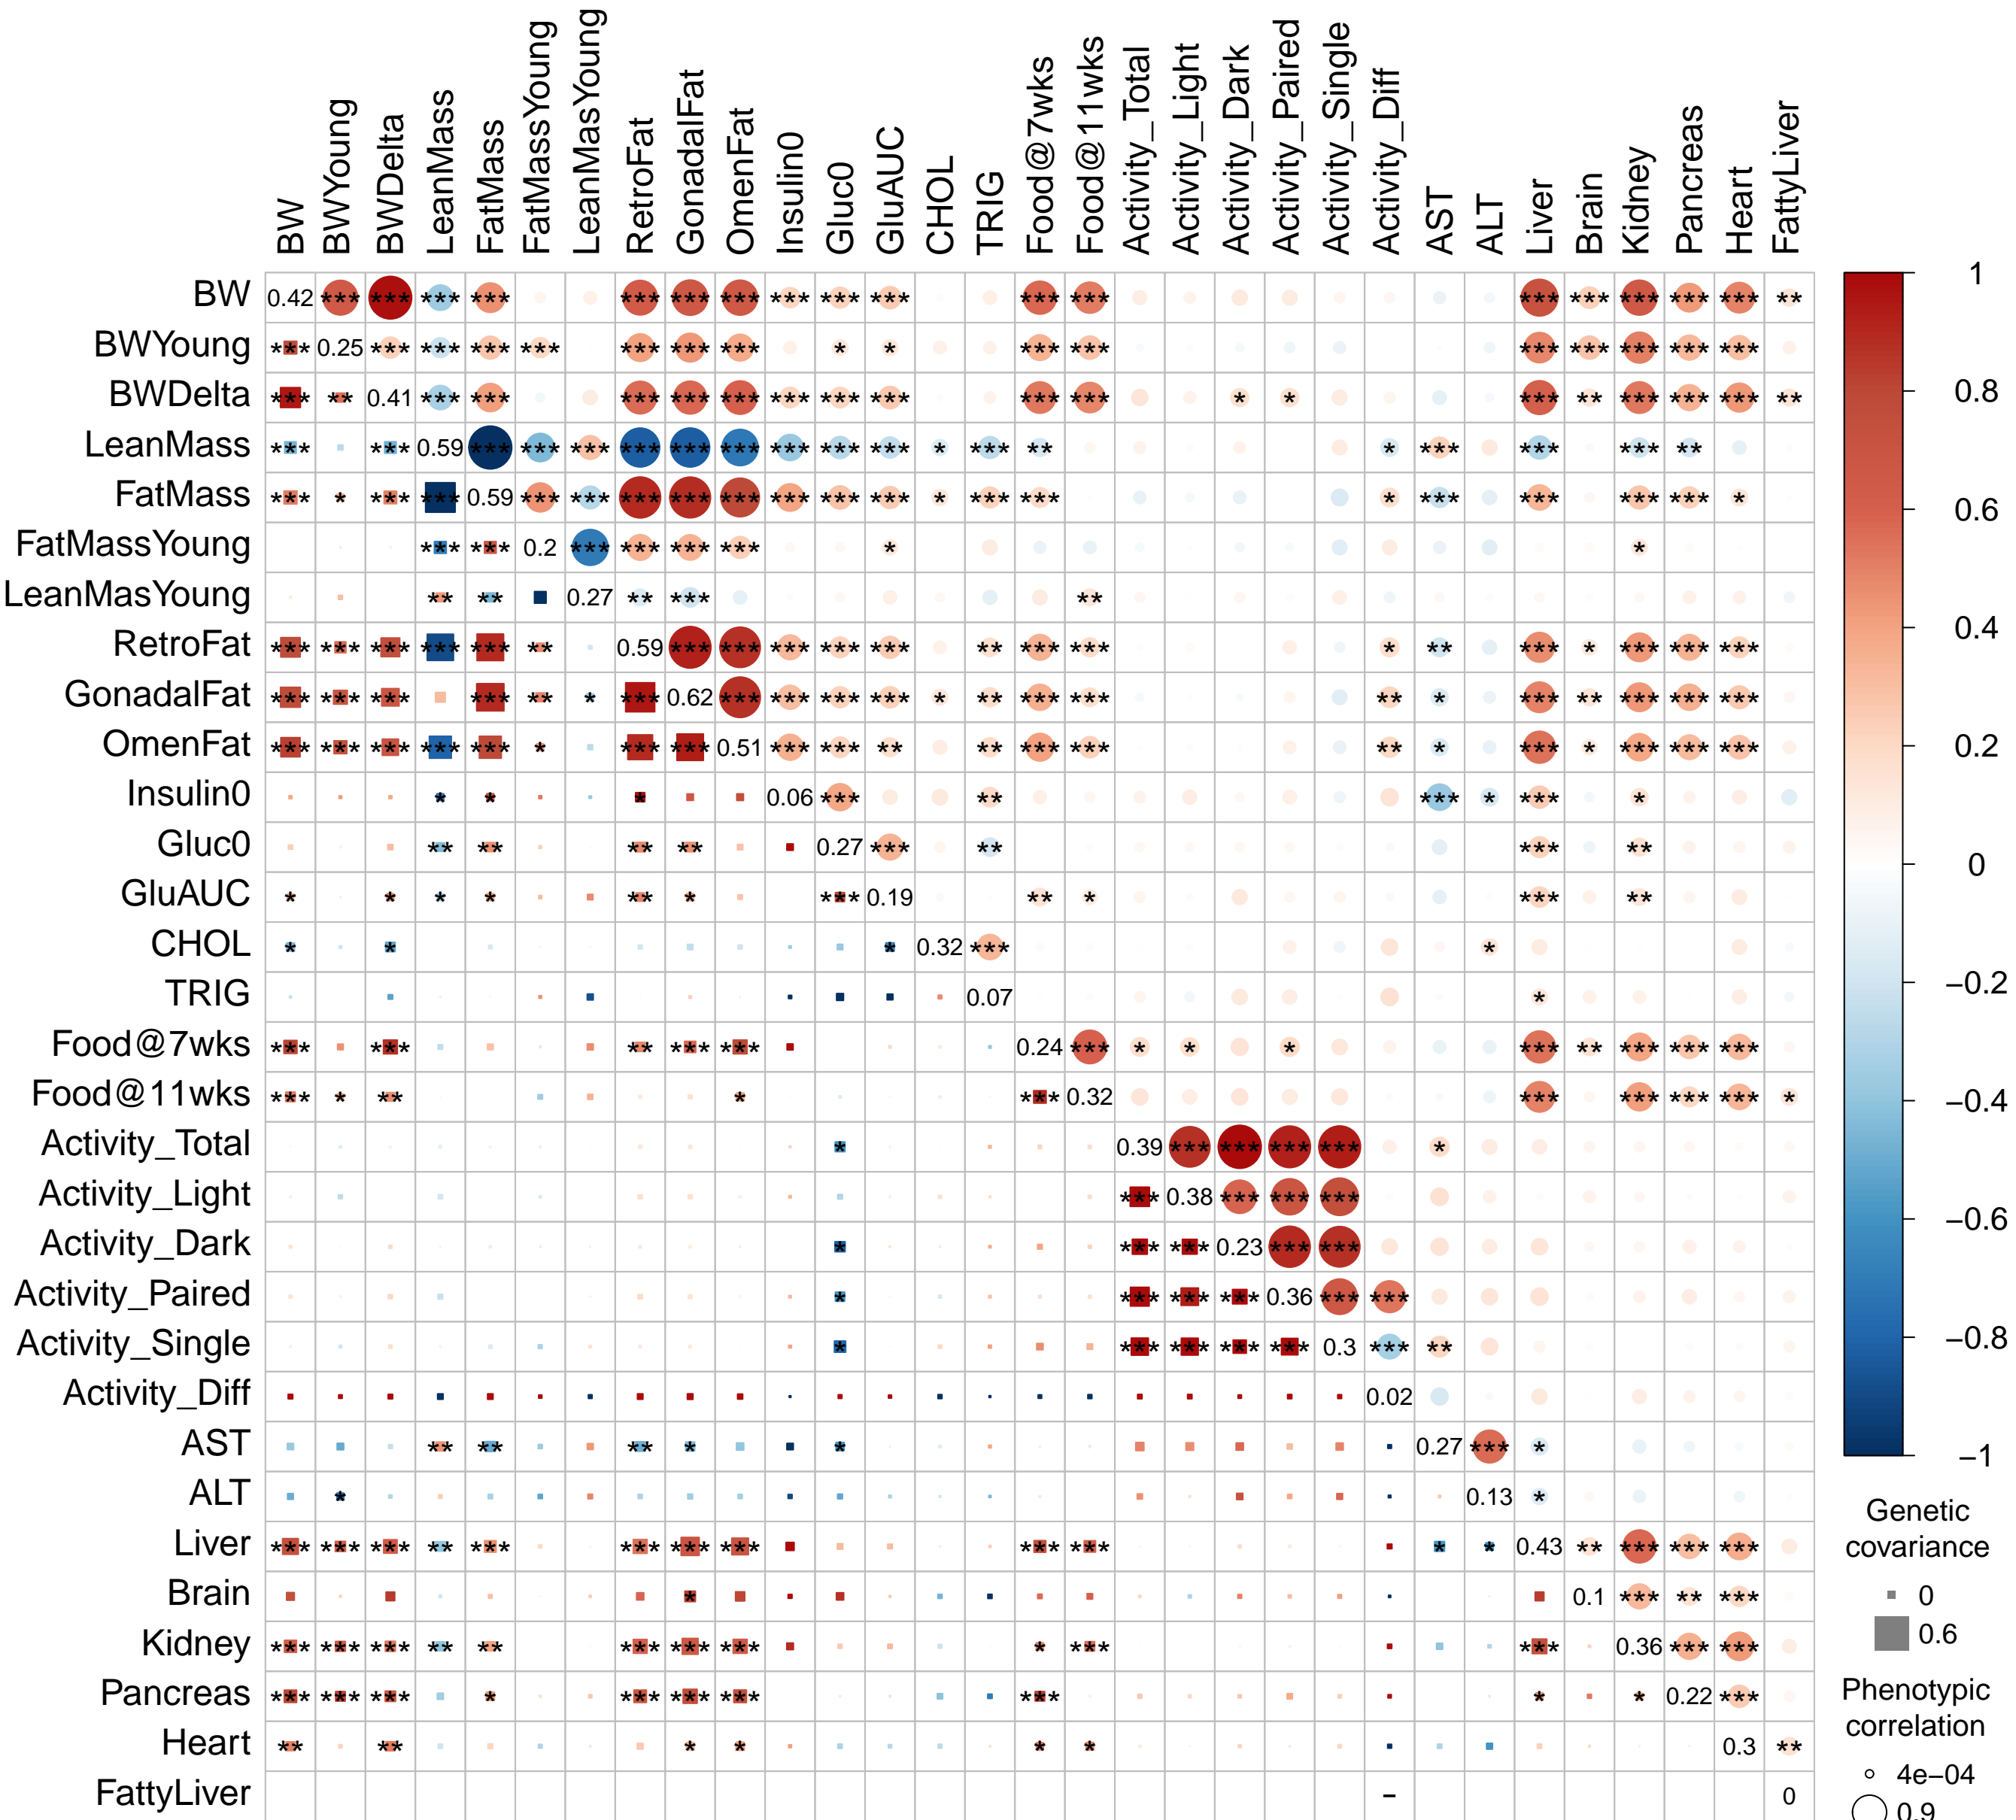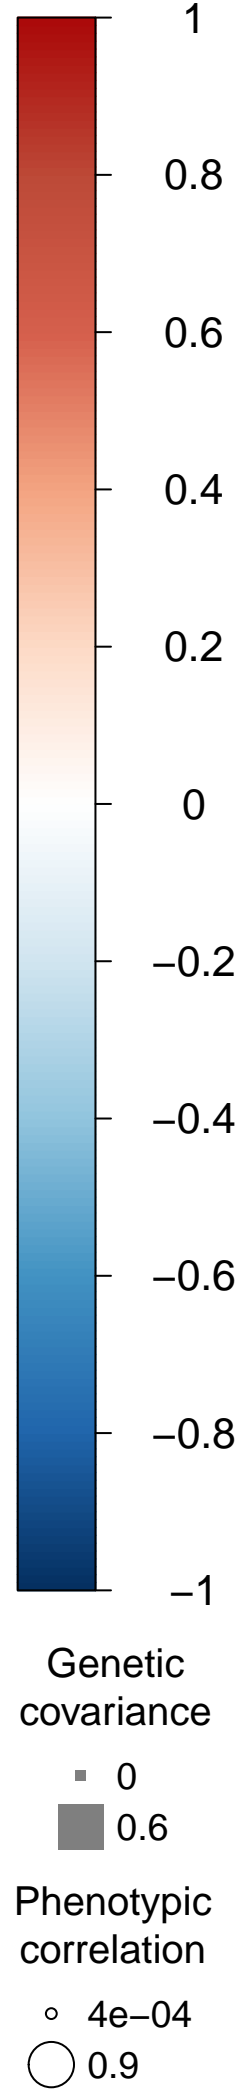

### Females on Low Fat Diet

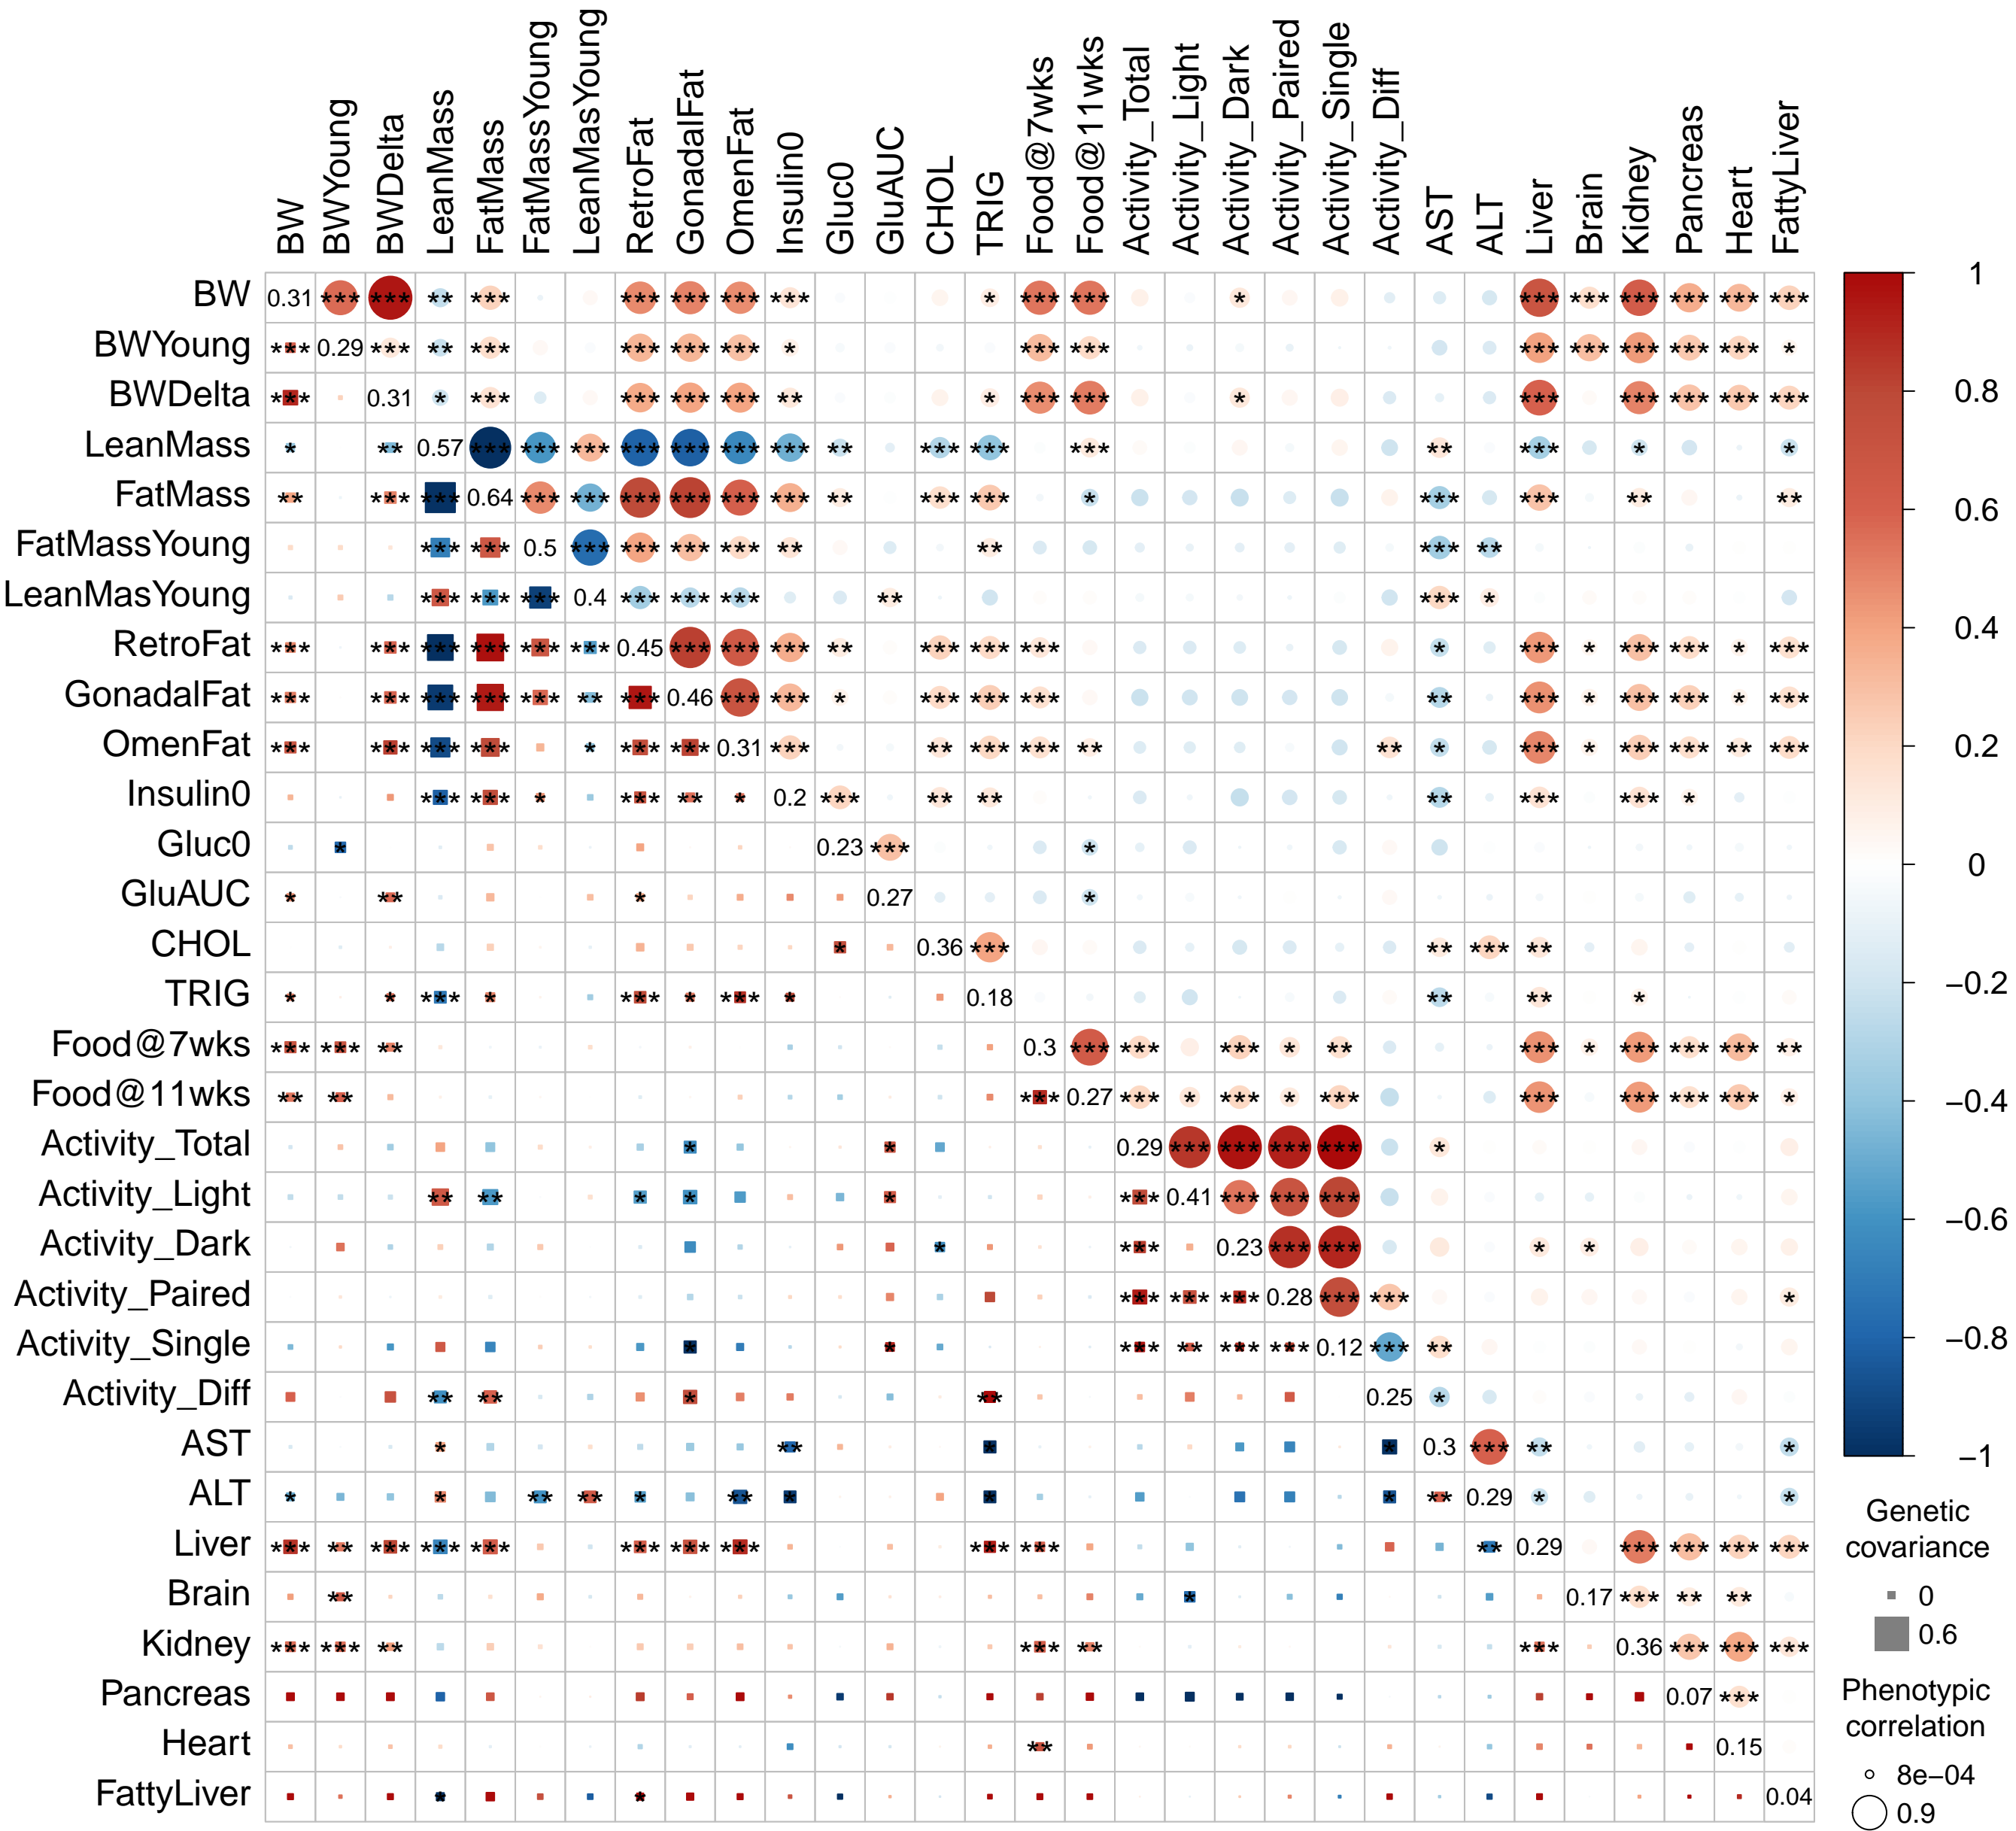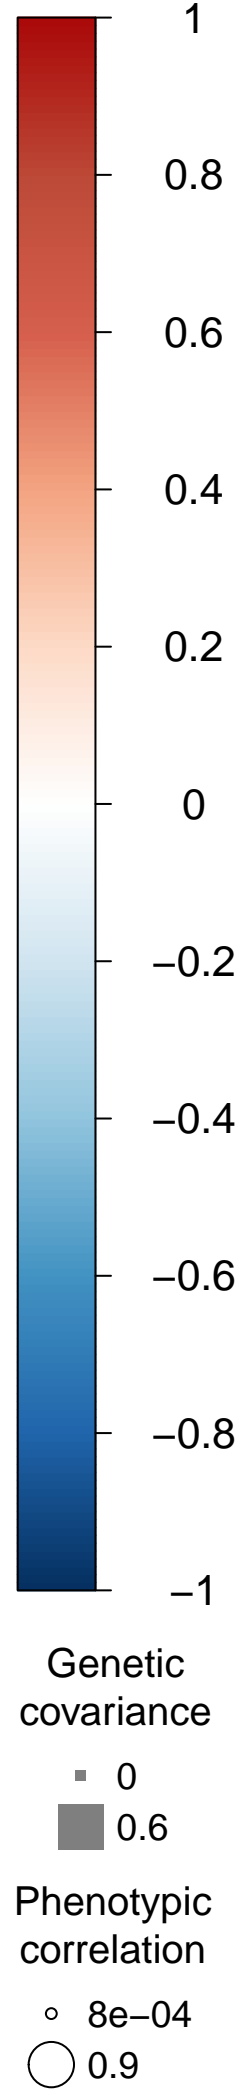

### Males on High Fat Diet

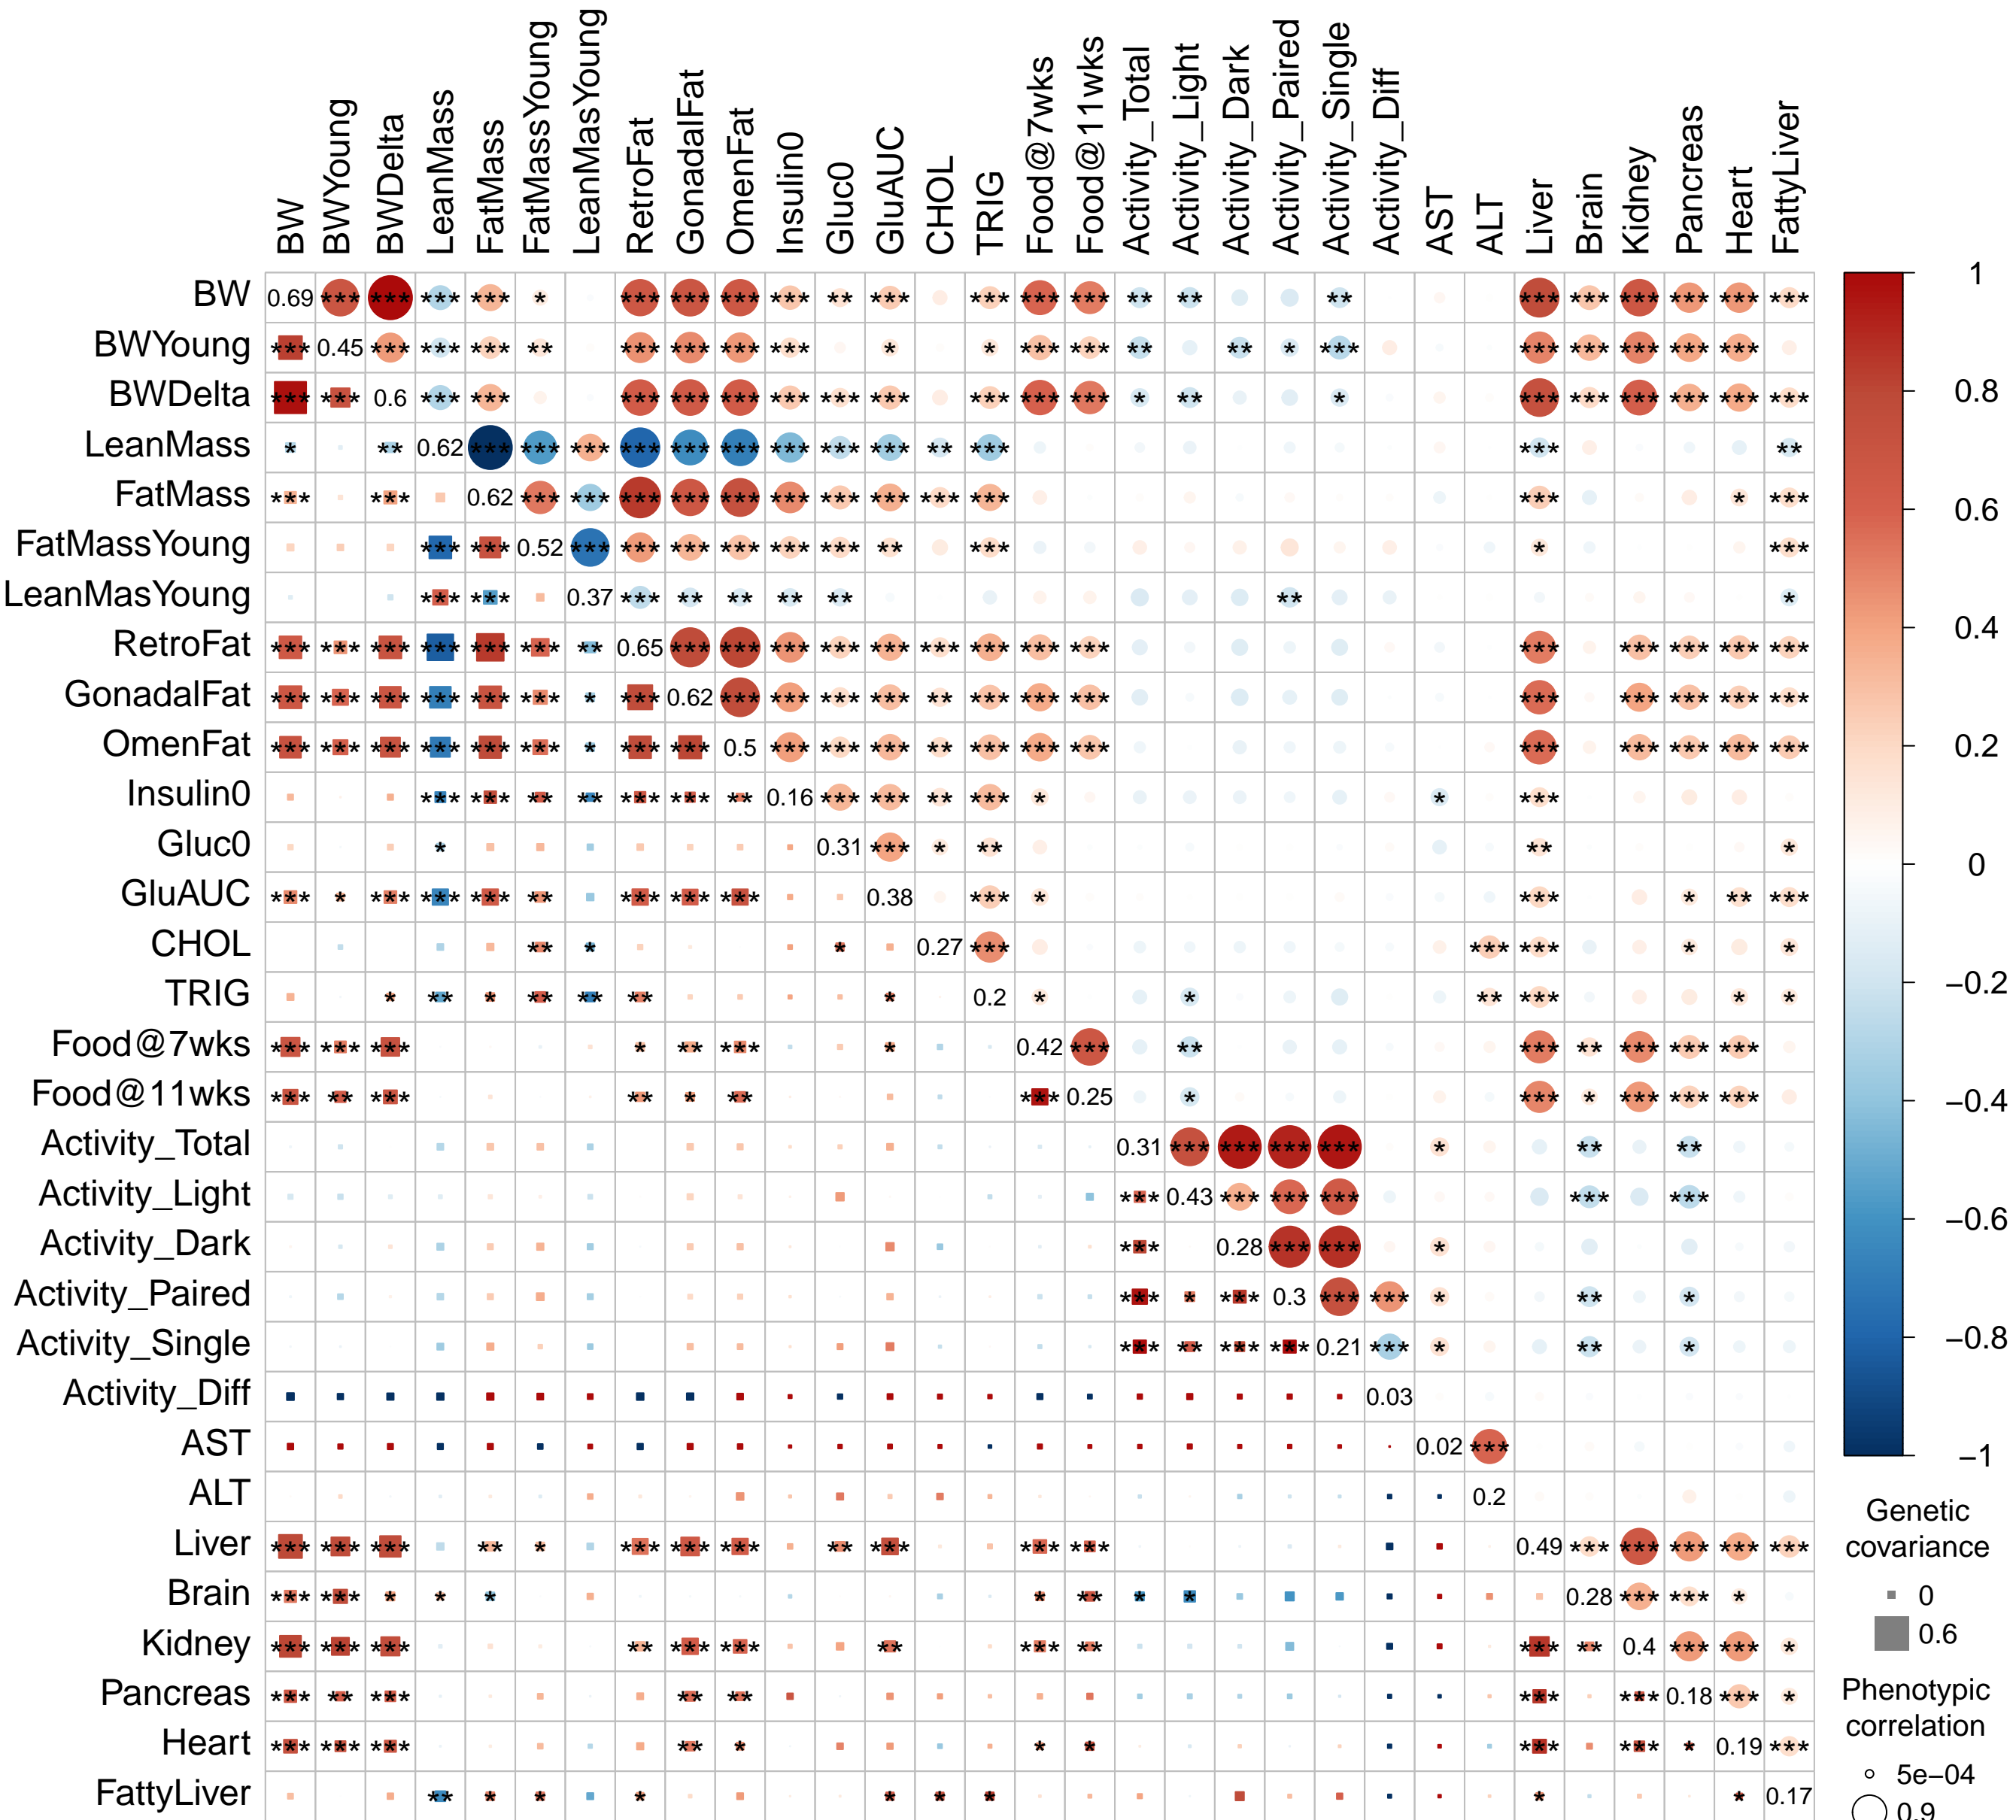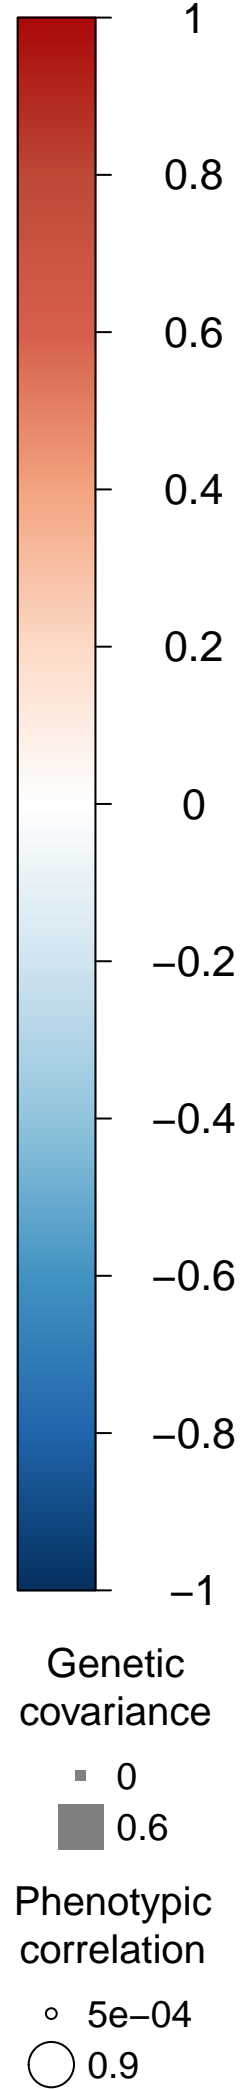

### Males on Low Fat Diet

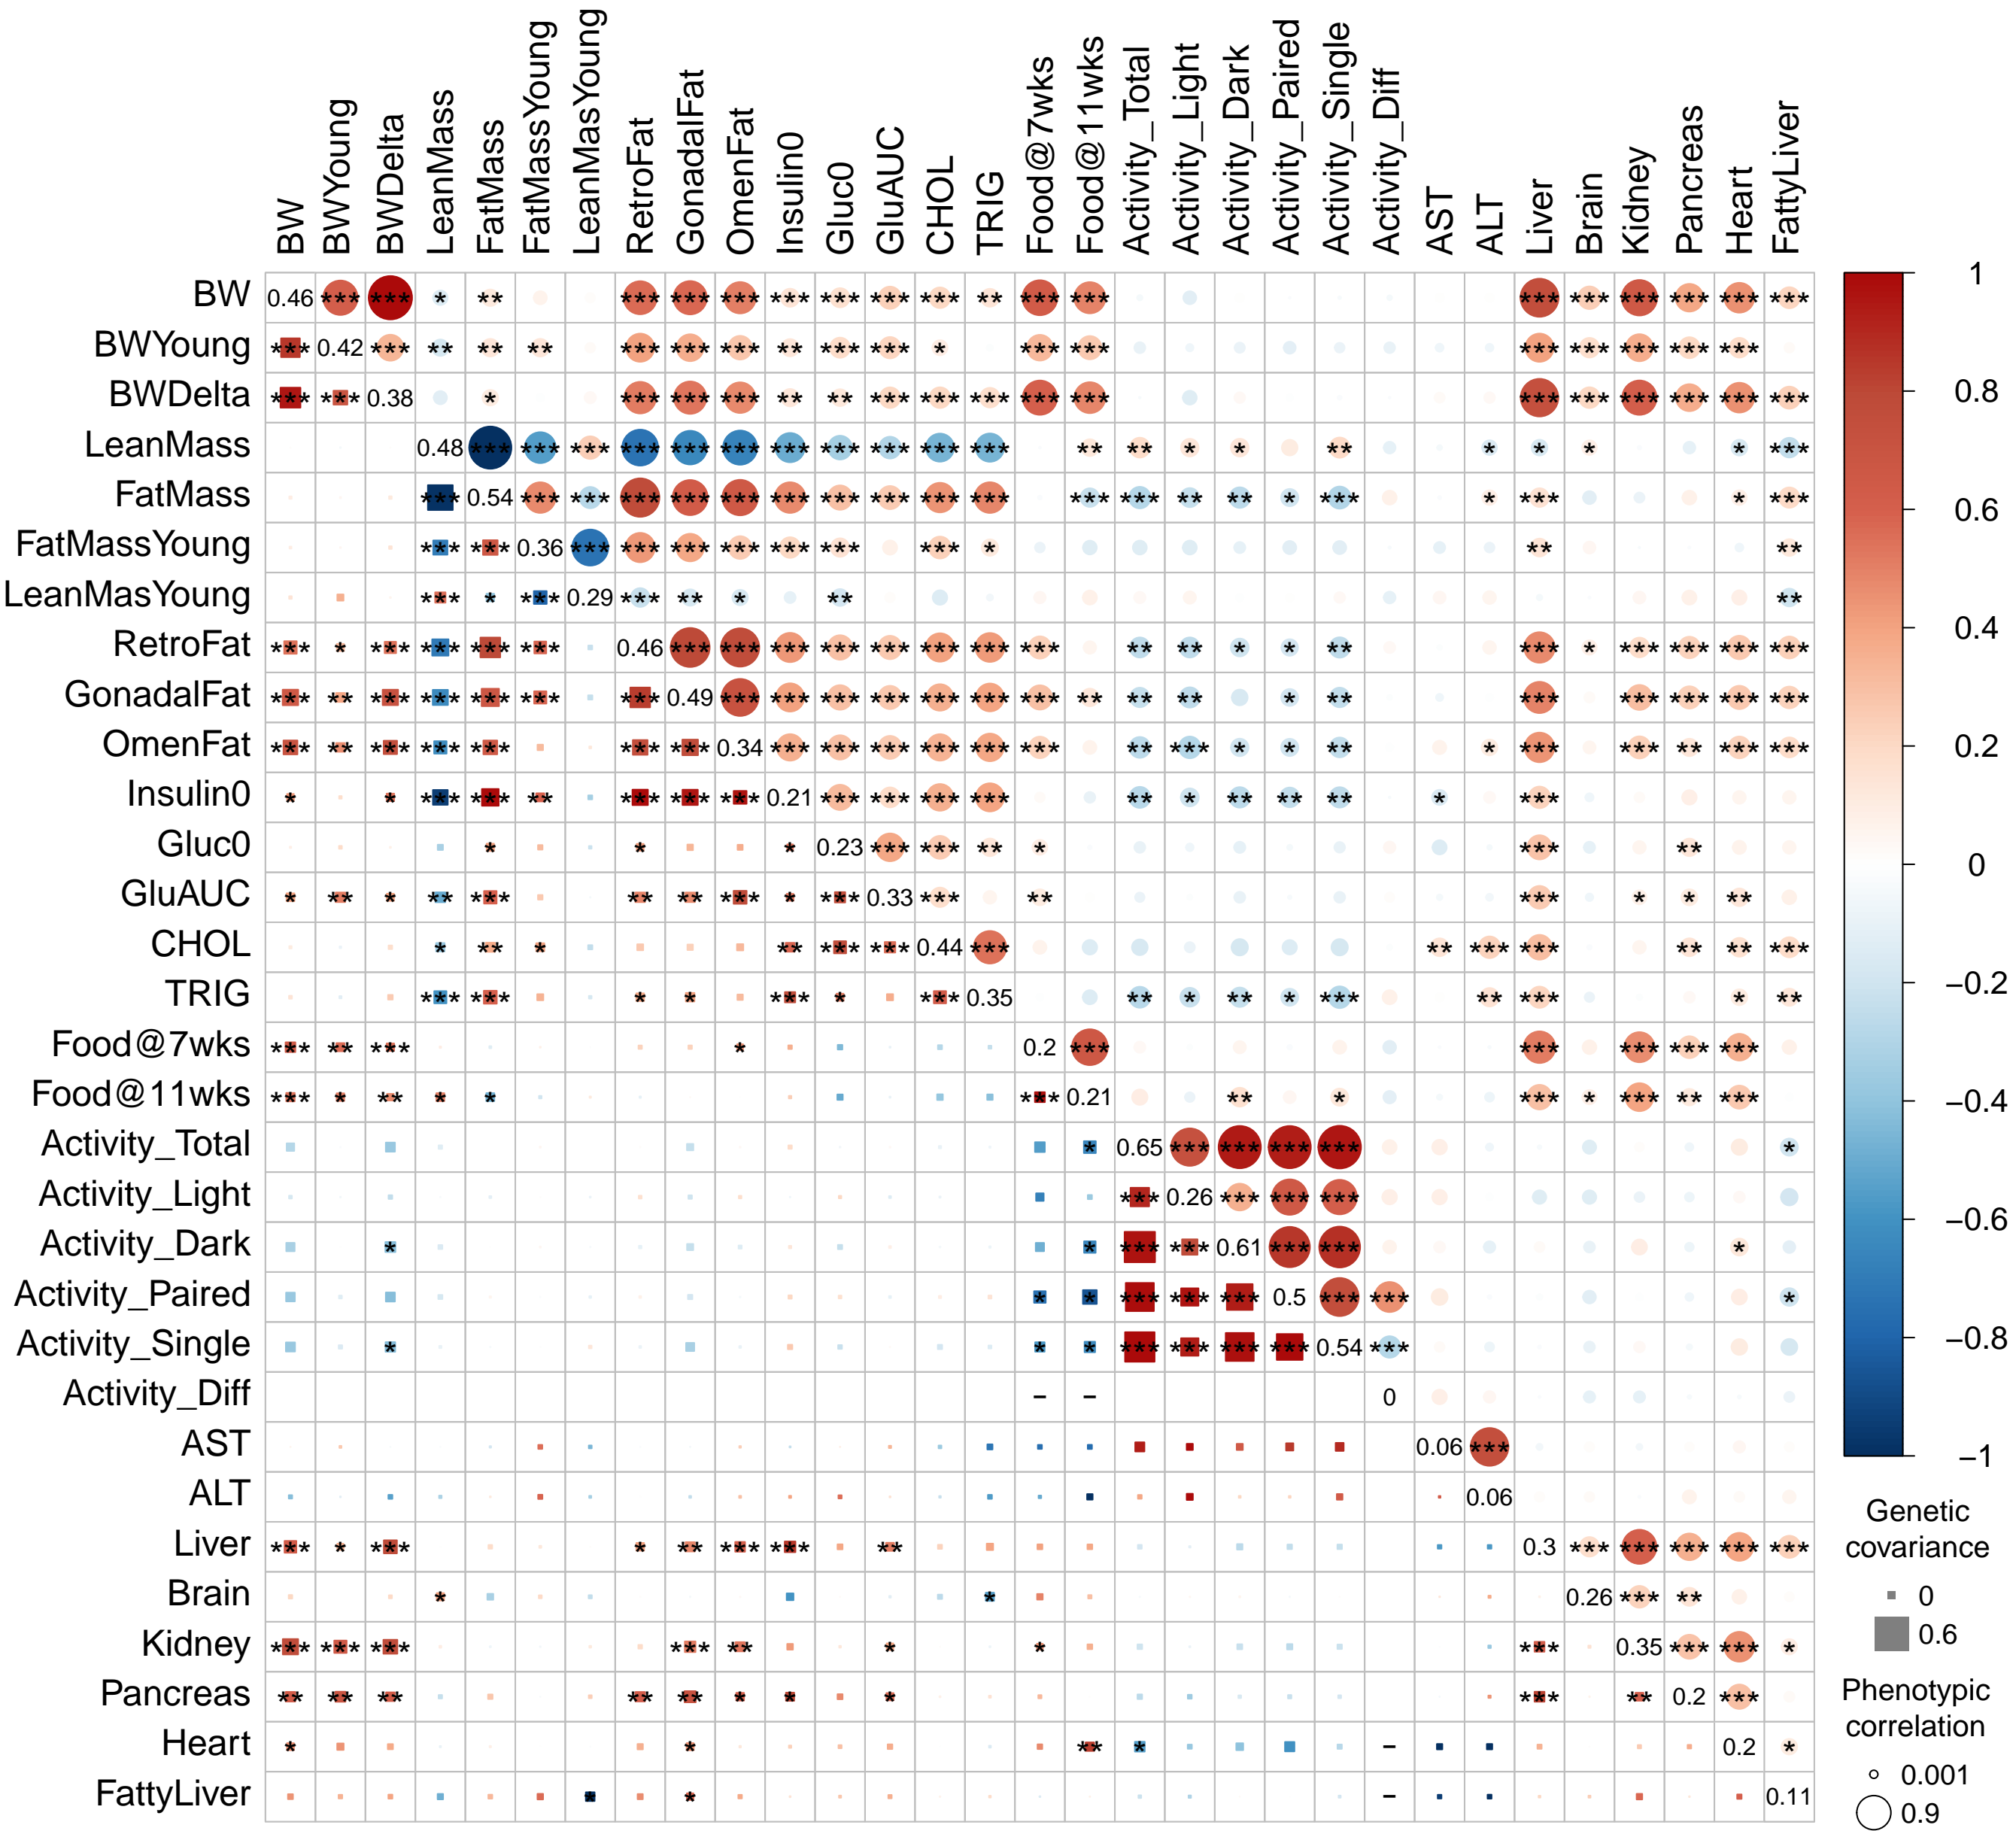

### Full Dataset

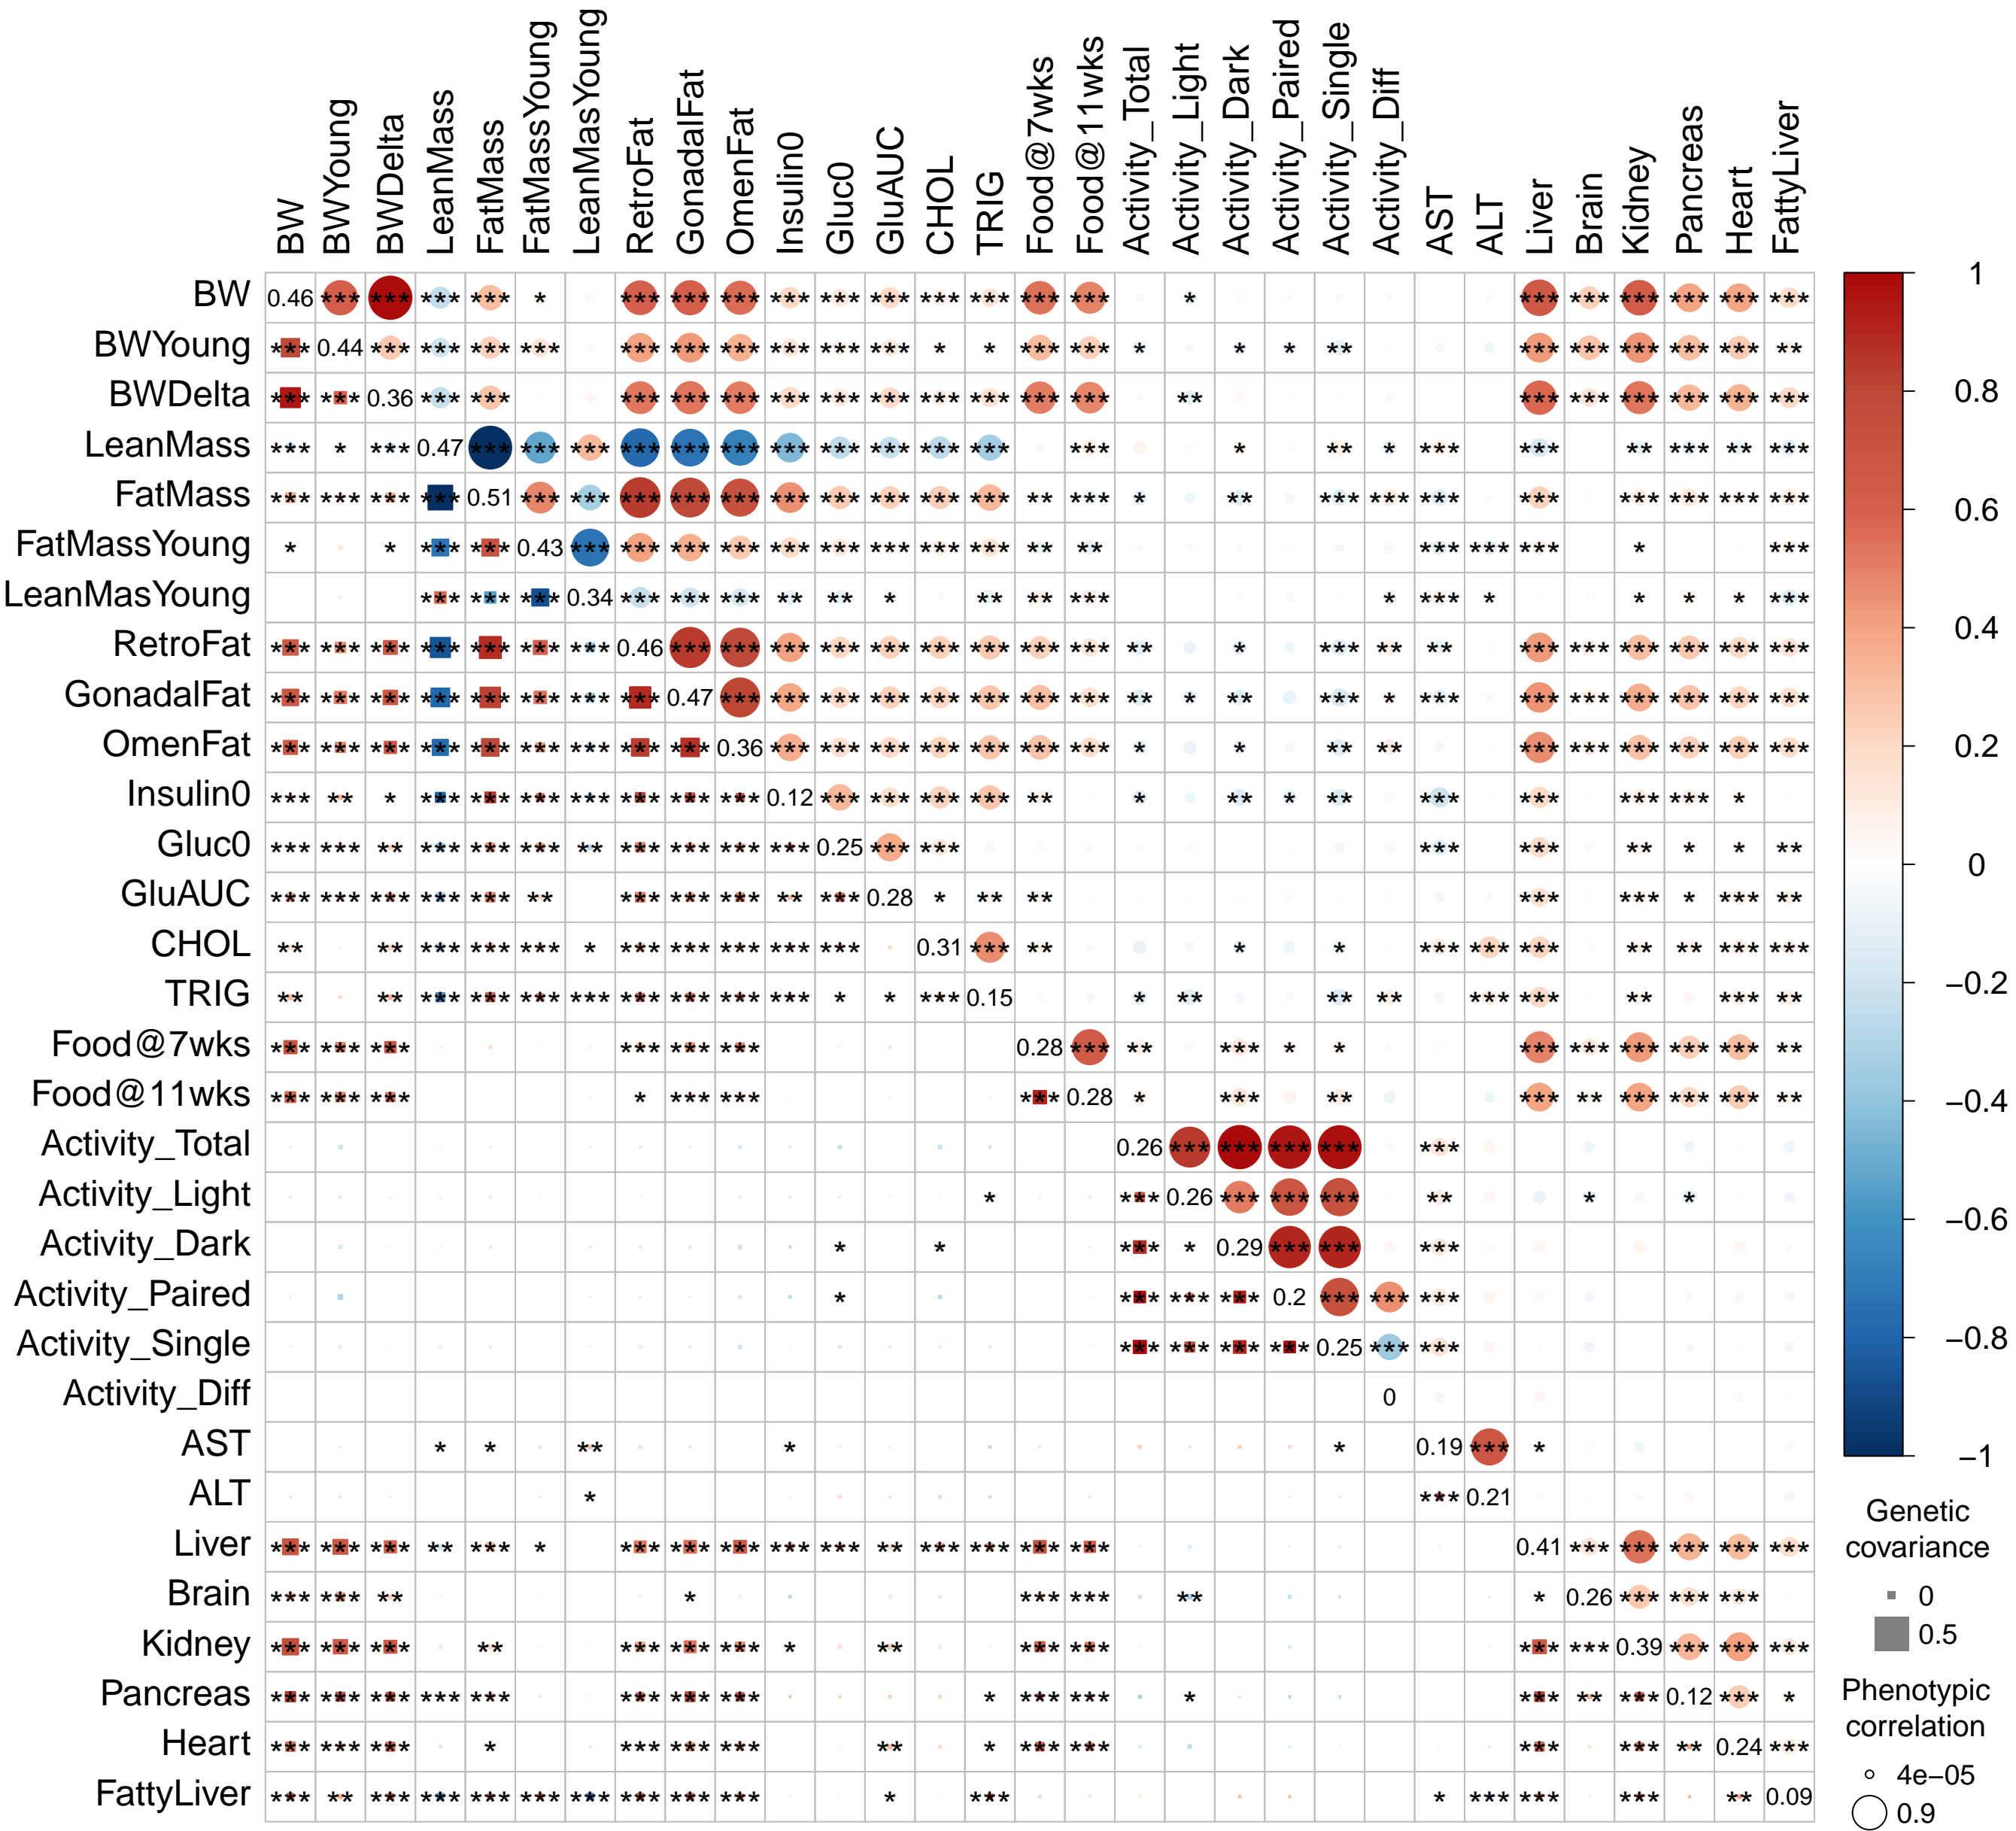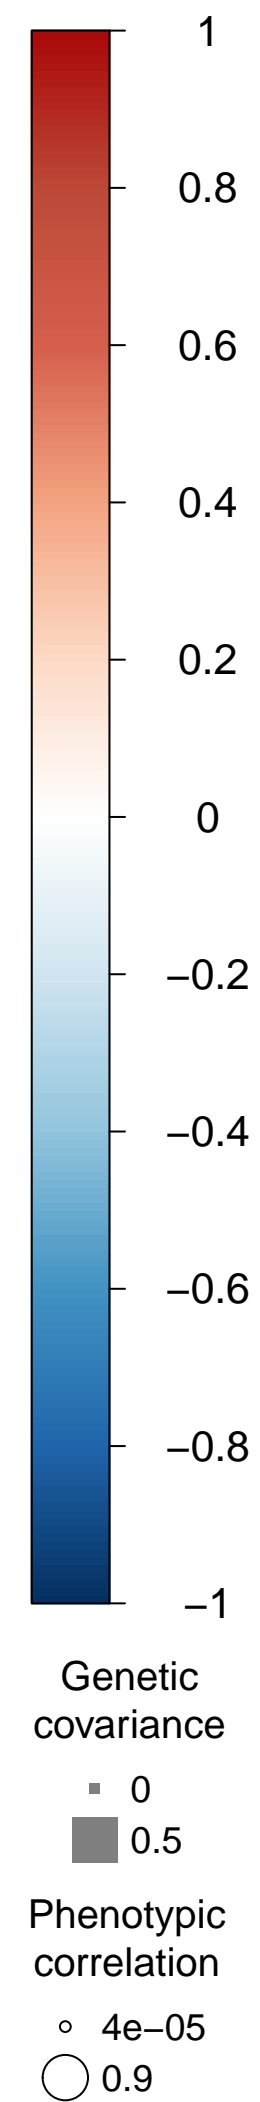

BWDelta-chr1\_258949393

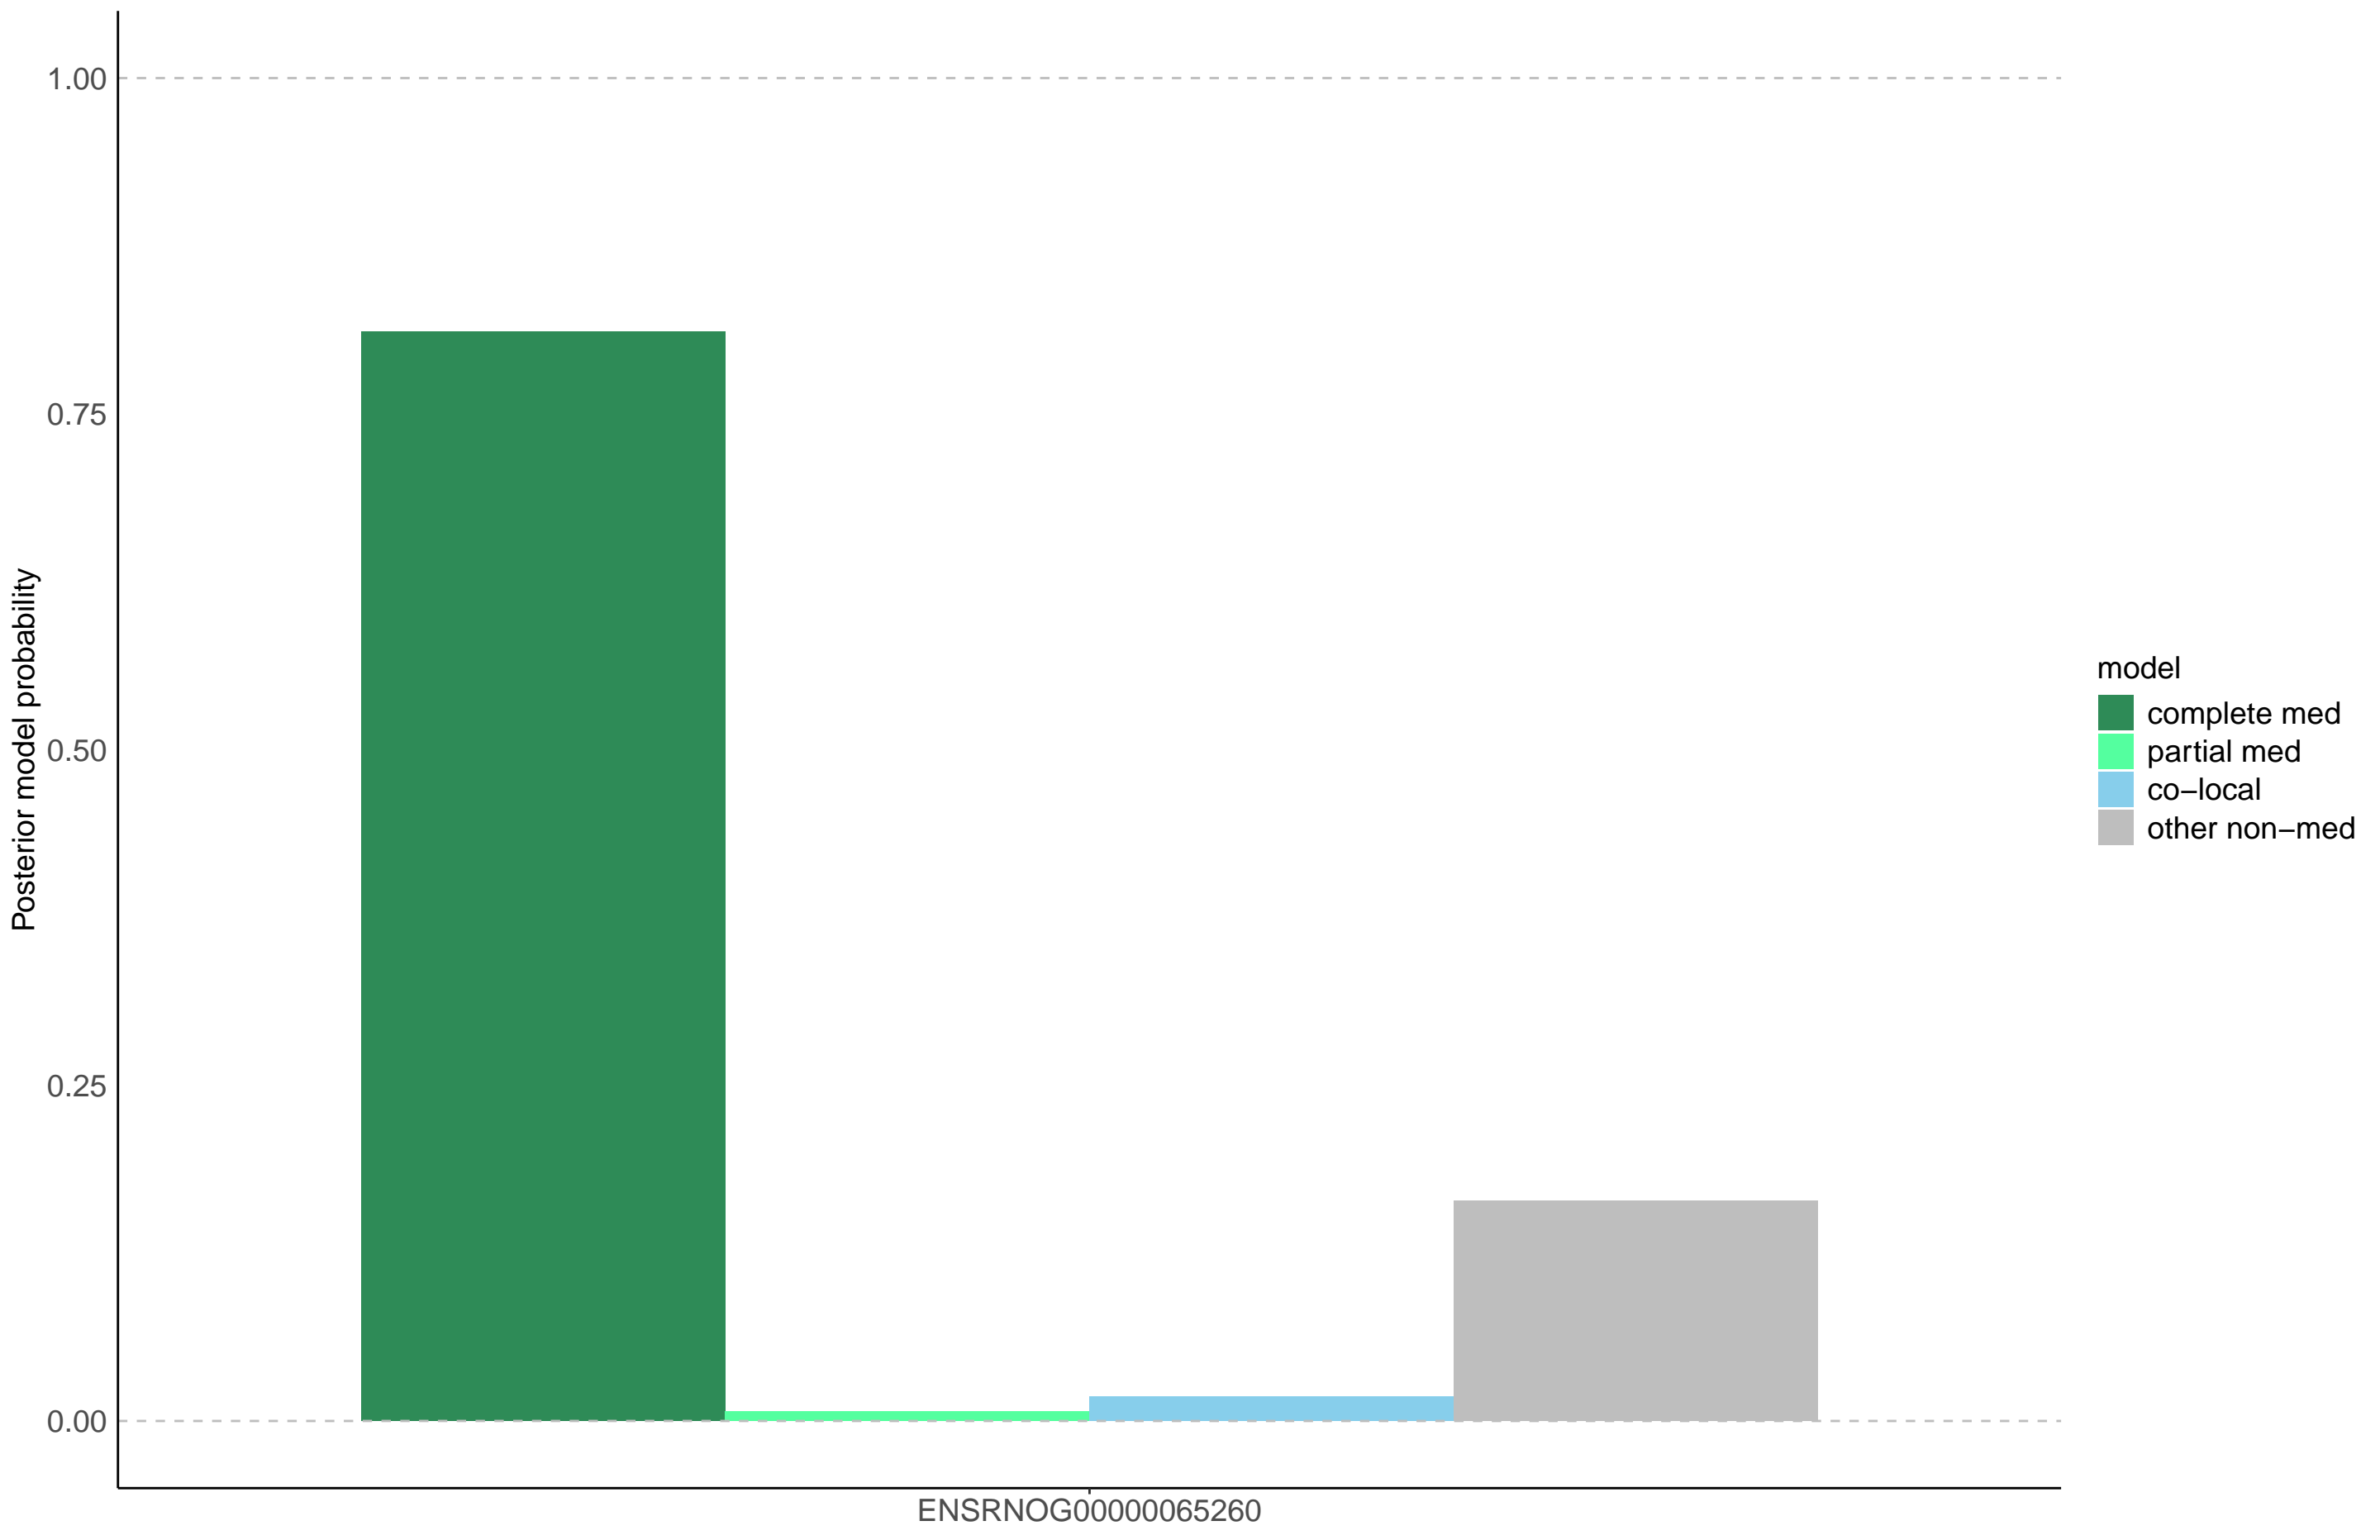

Brain/BW-chr1\_259628230

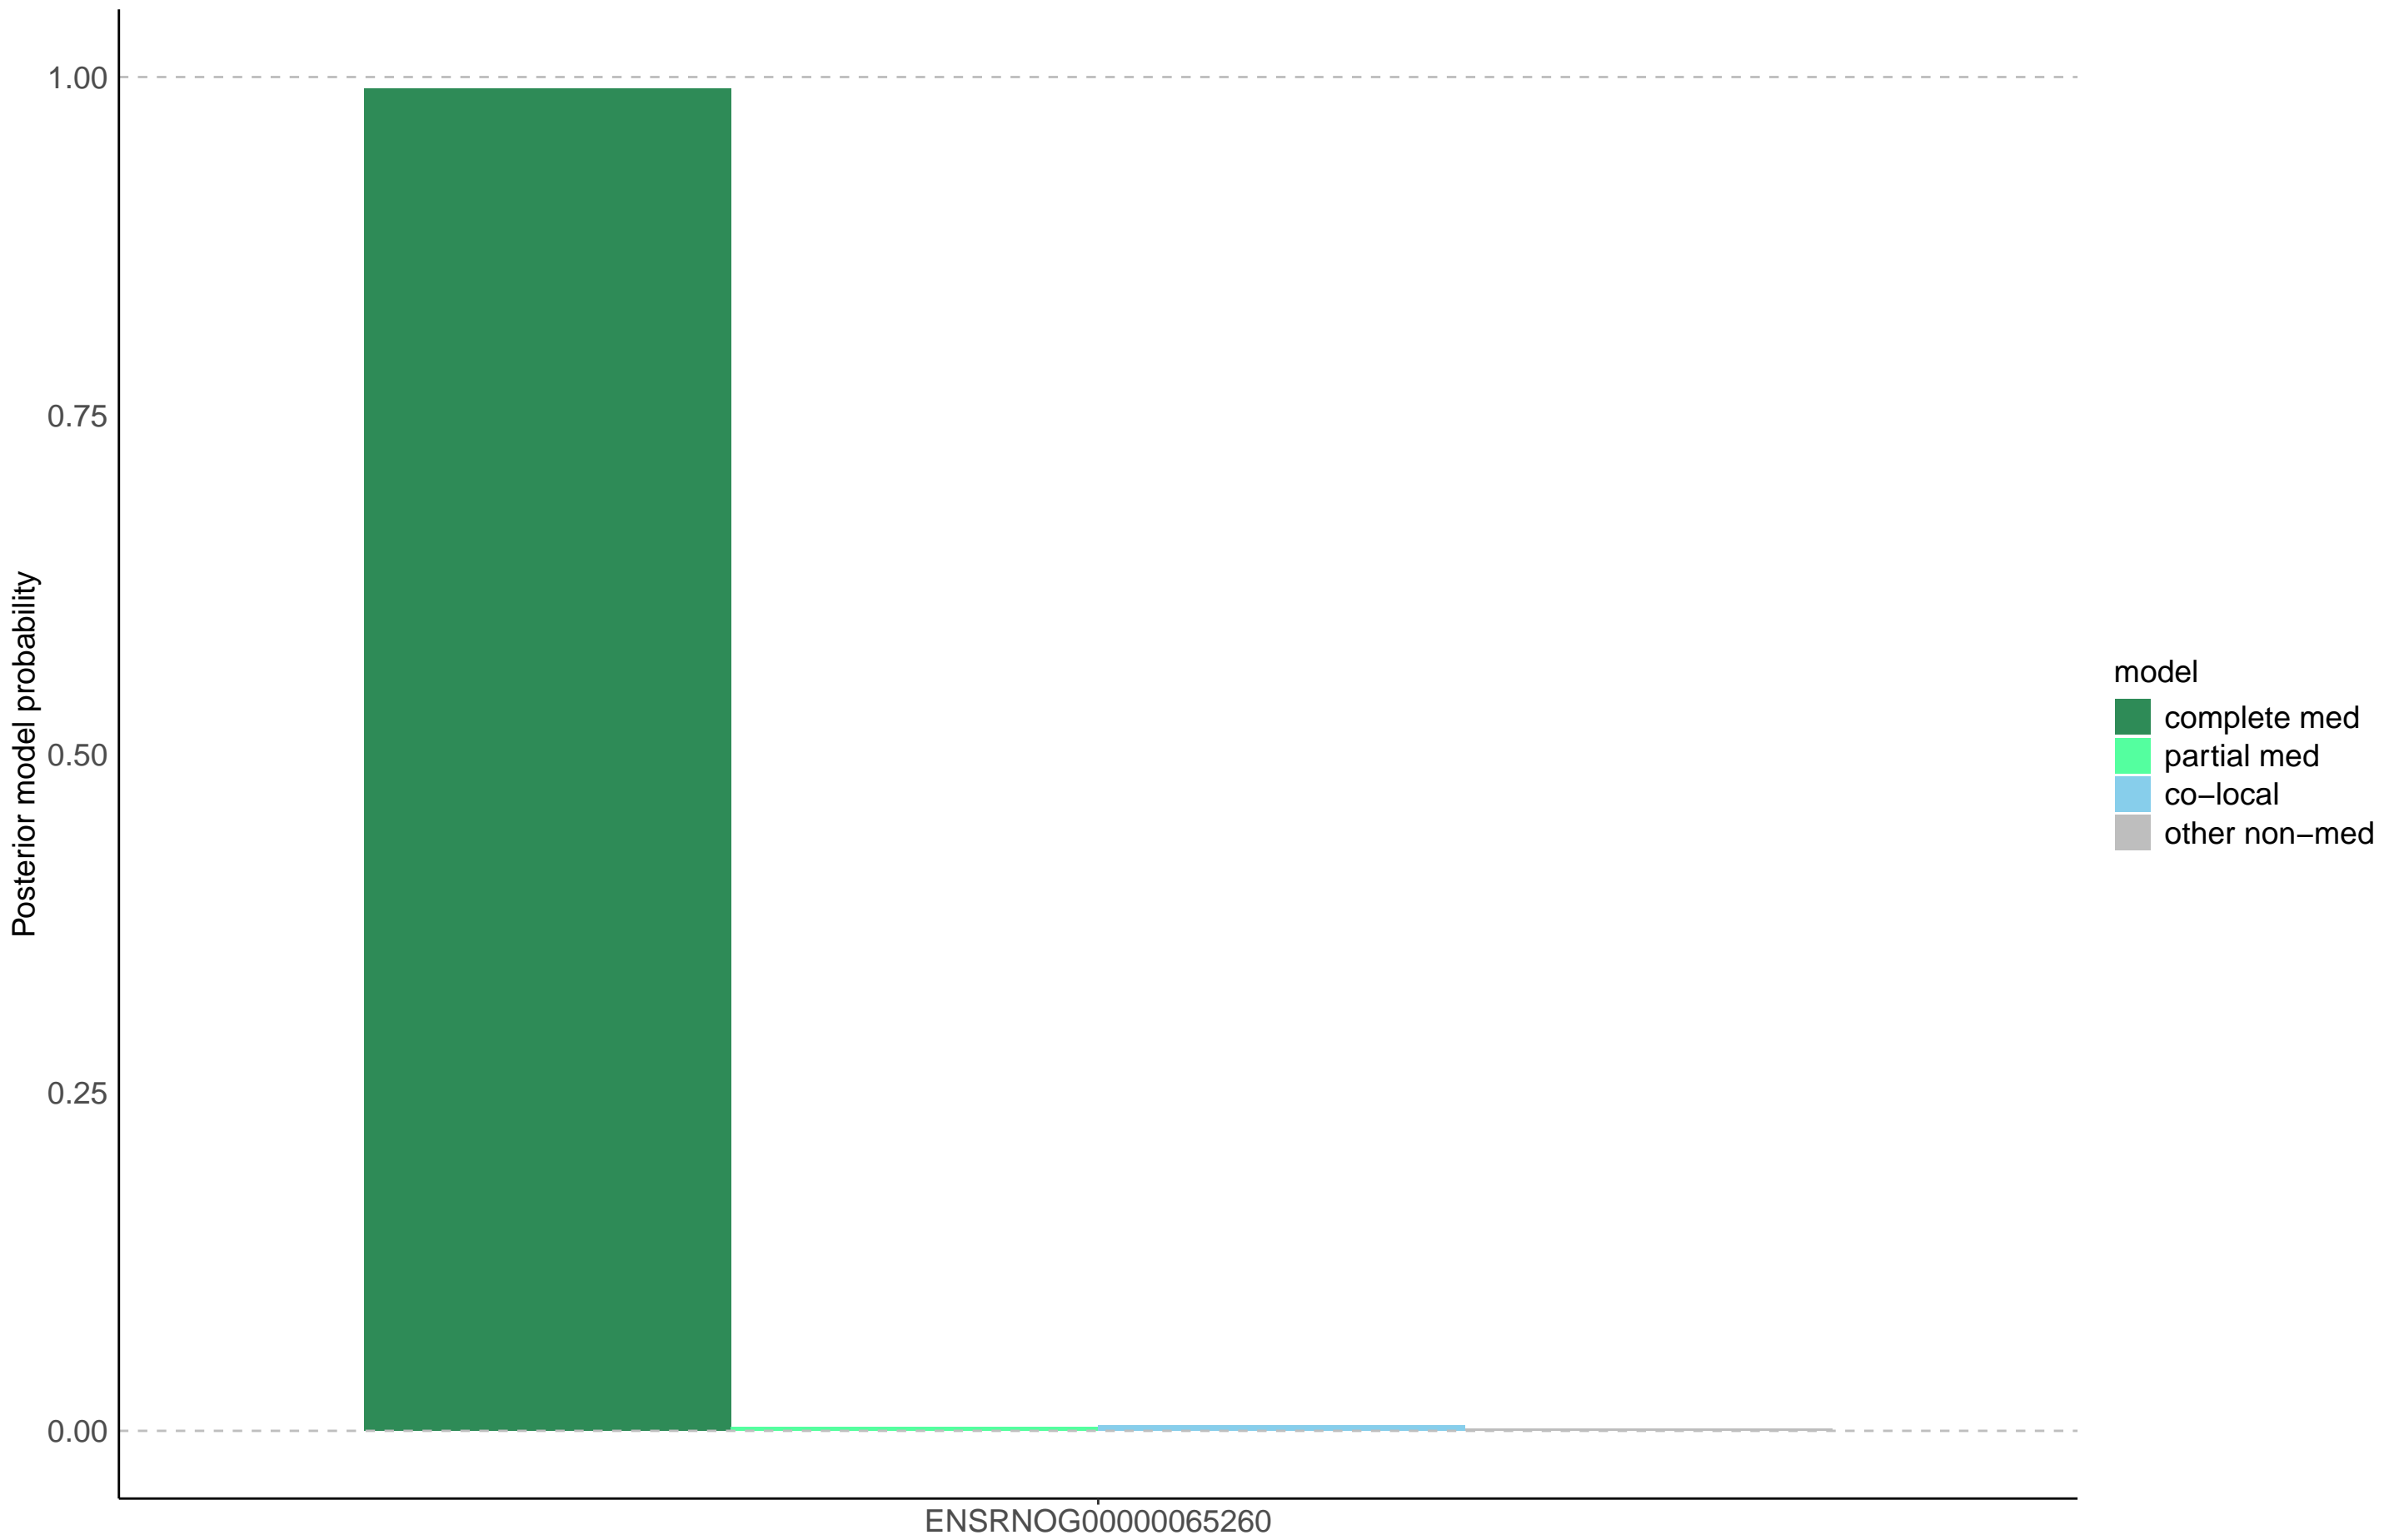

# CHOL-chr3\_115212825

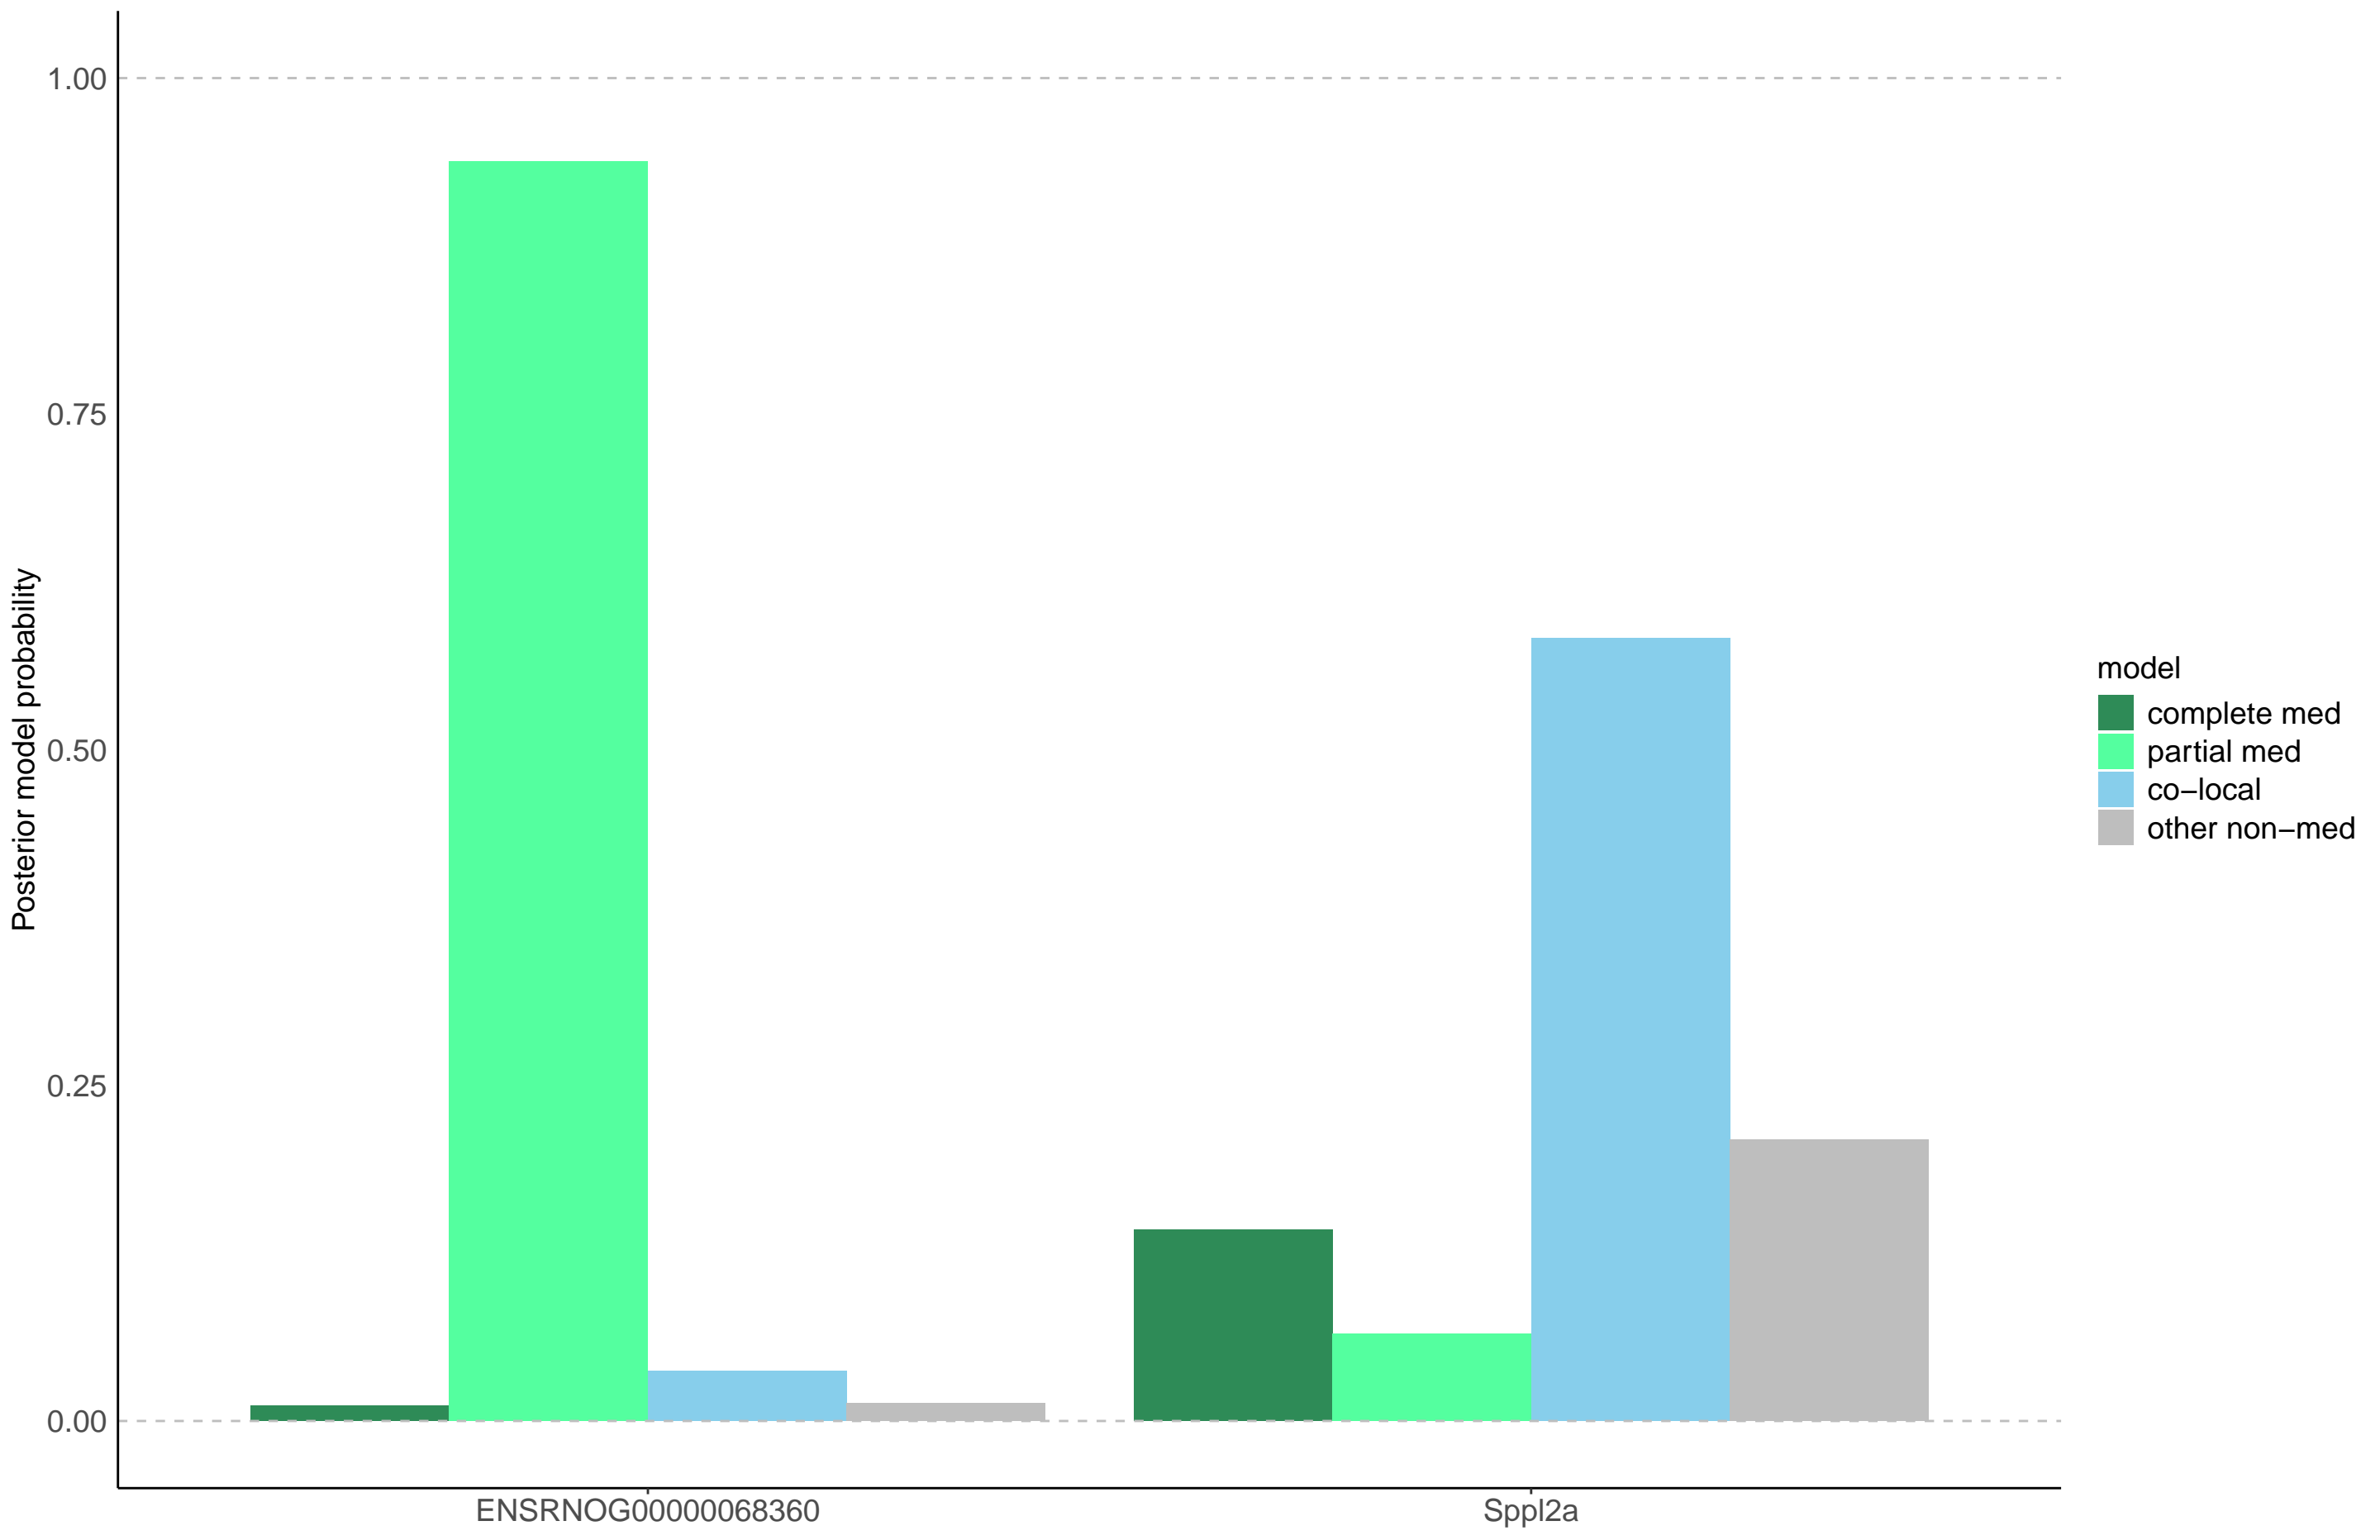

Heart-chr5\_158831441

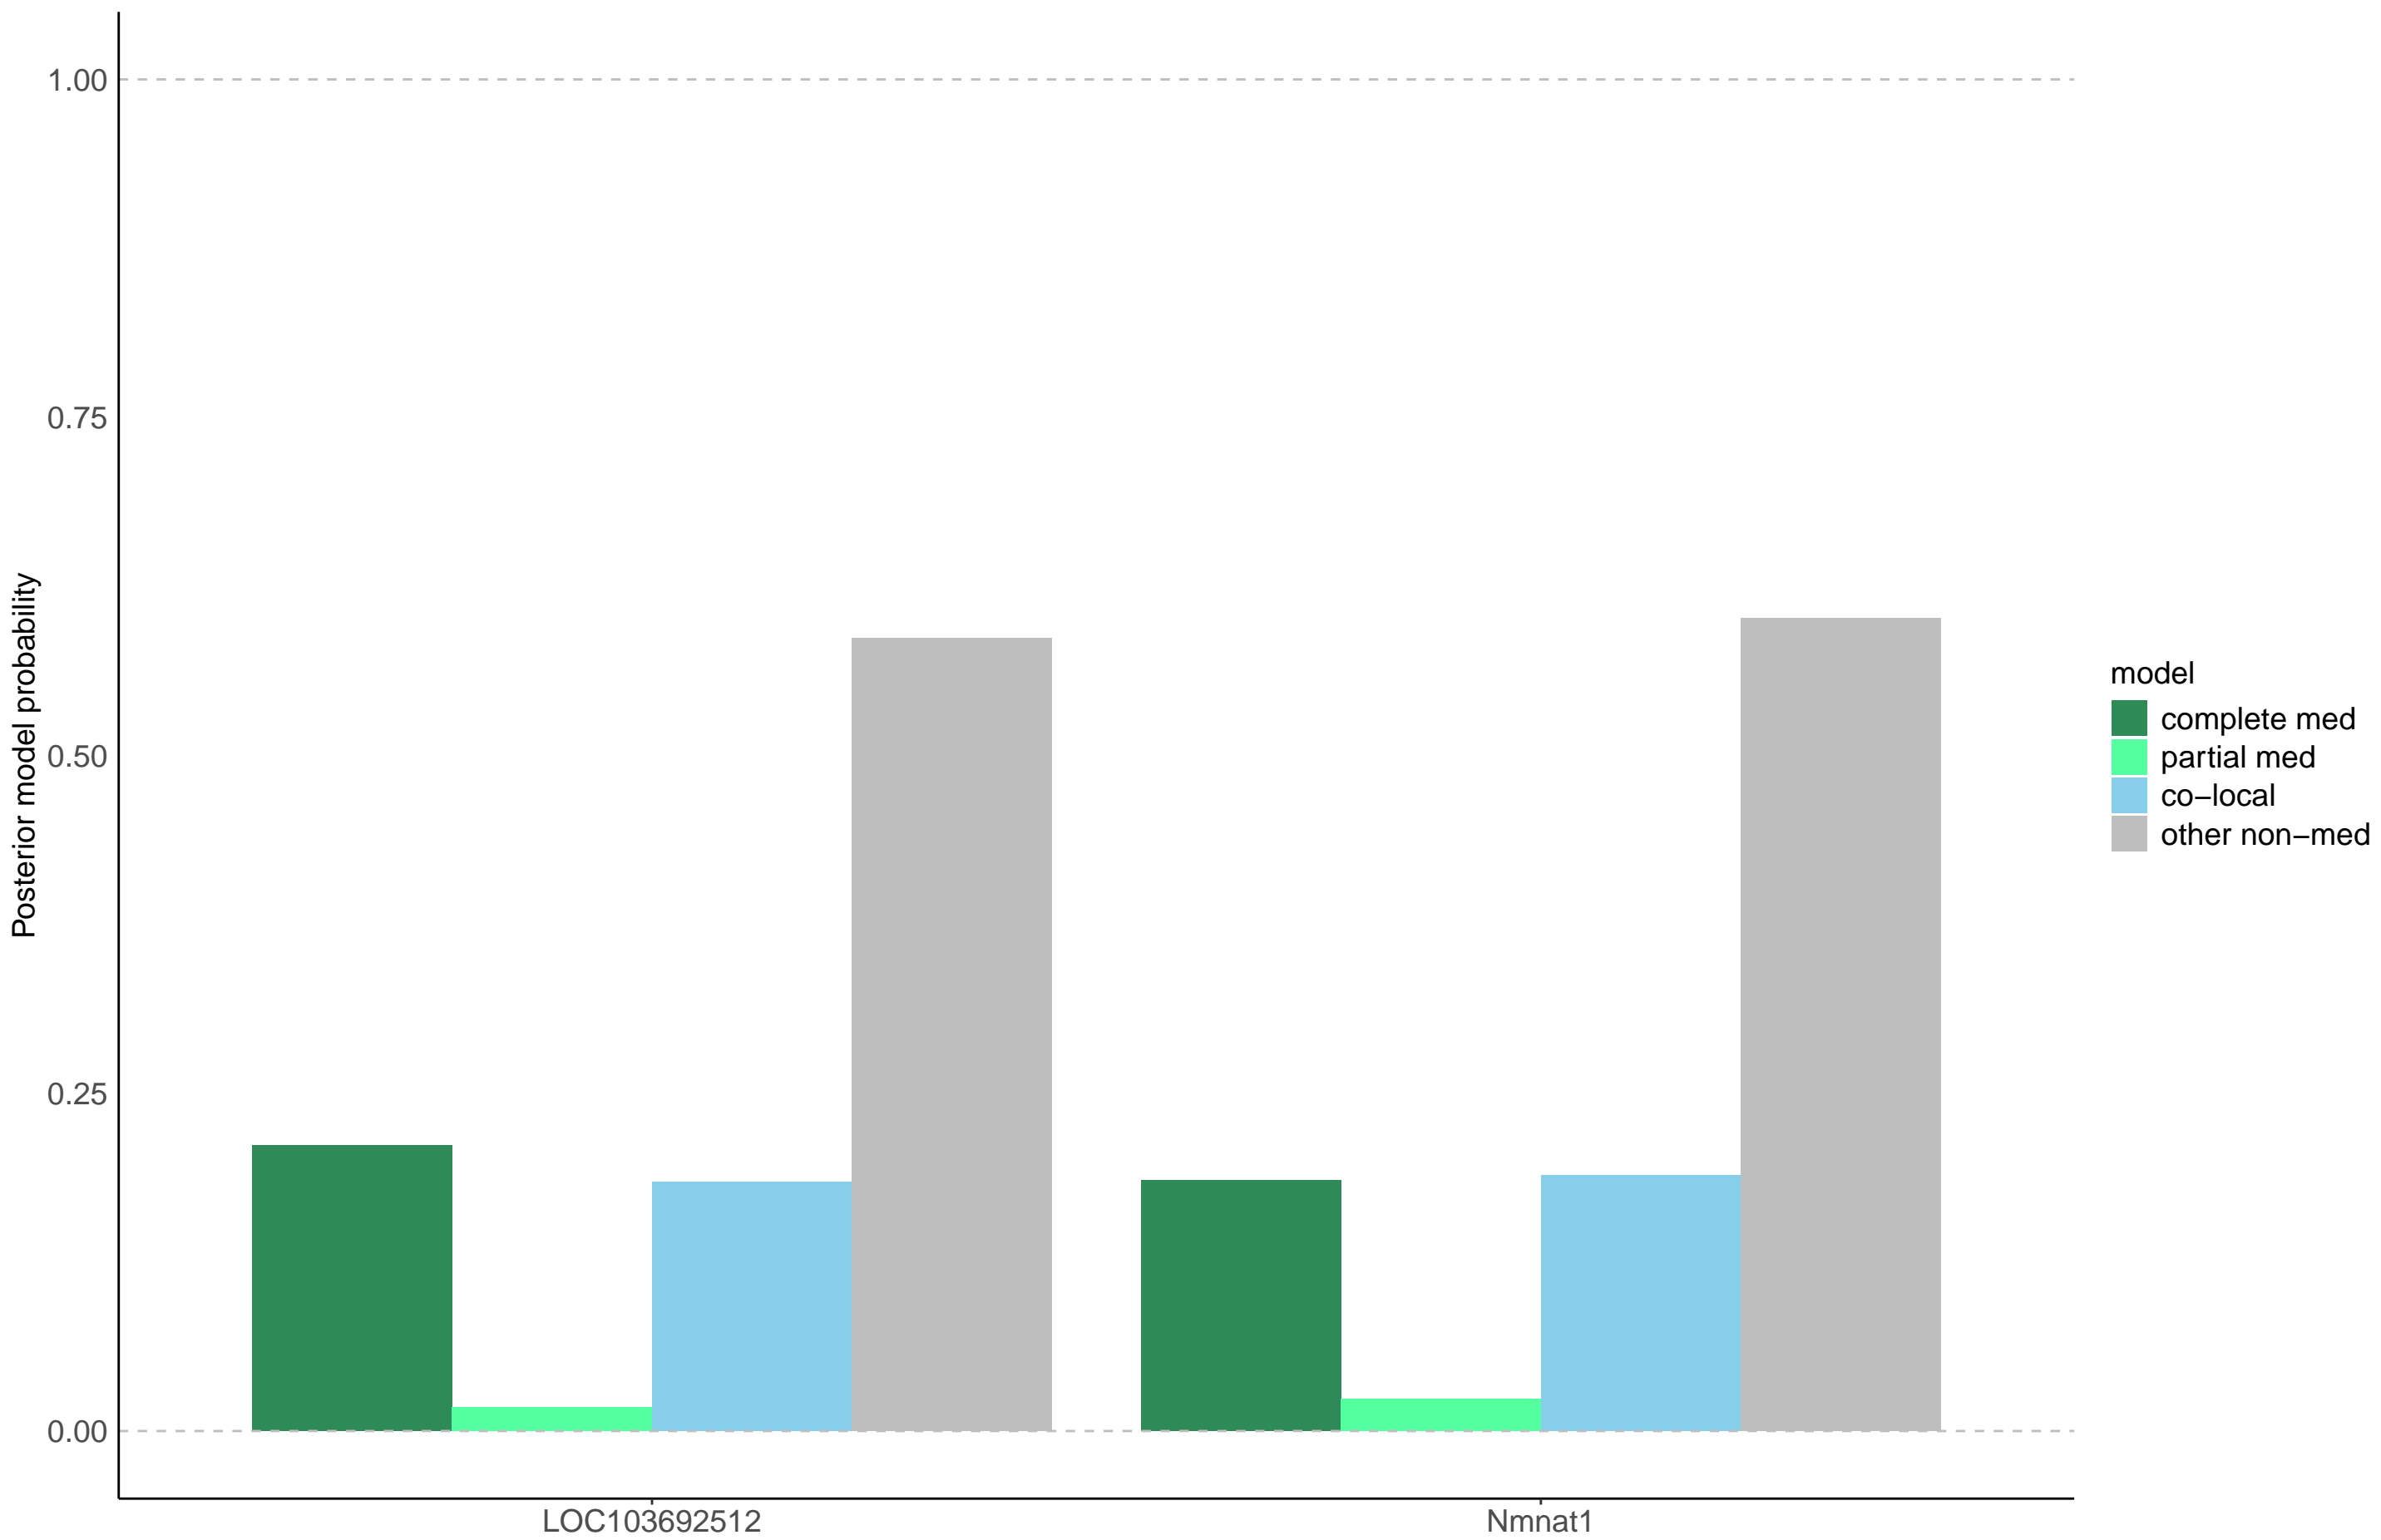

CHOL-chr6\_28466690

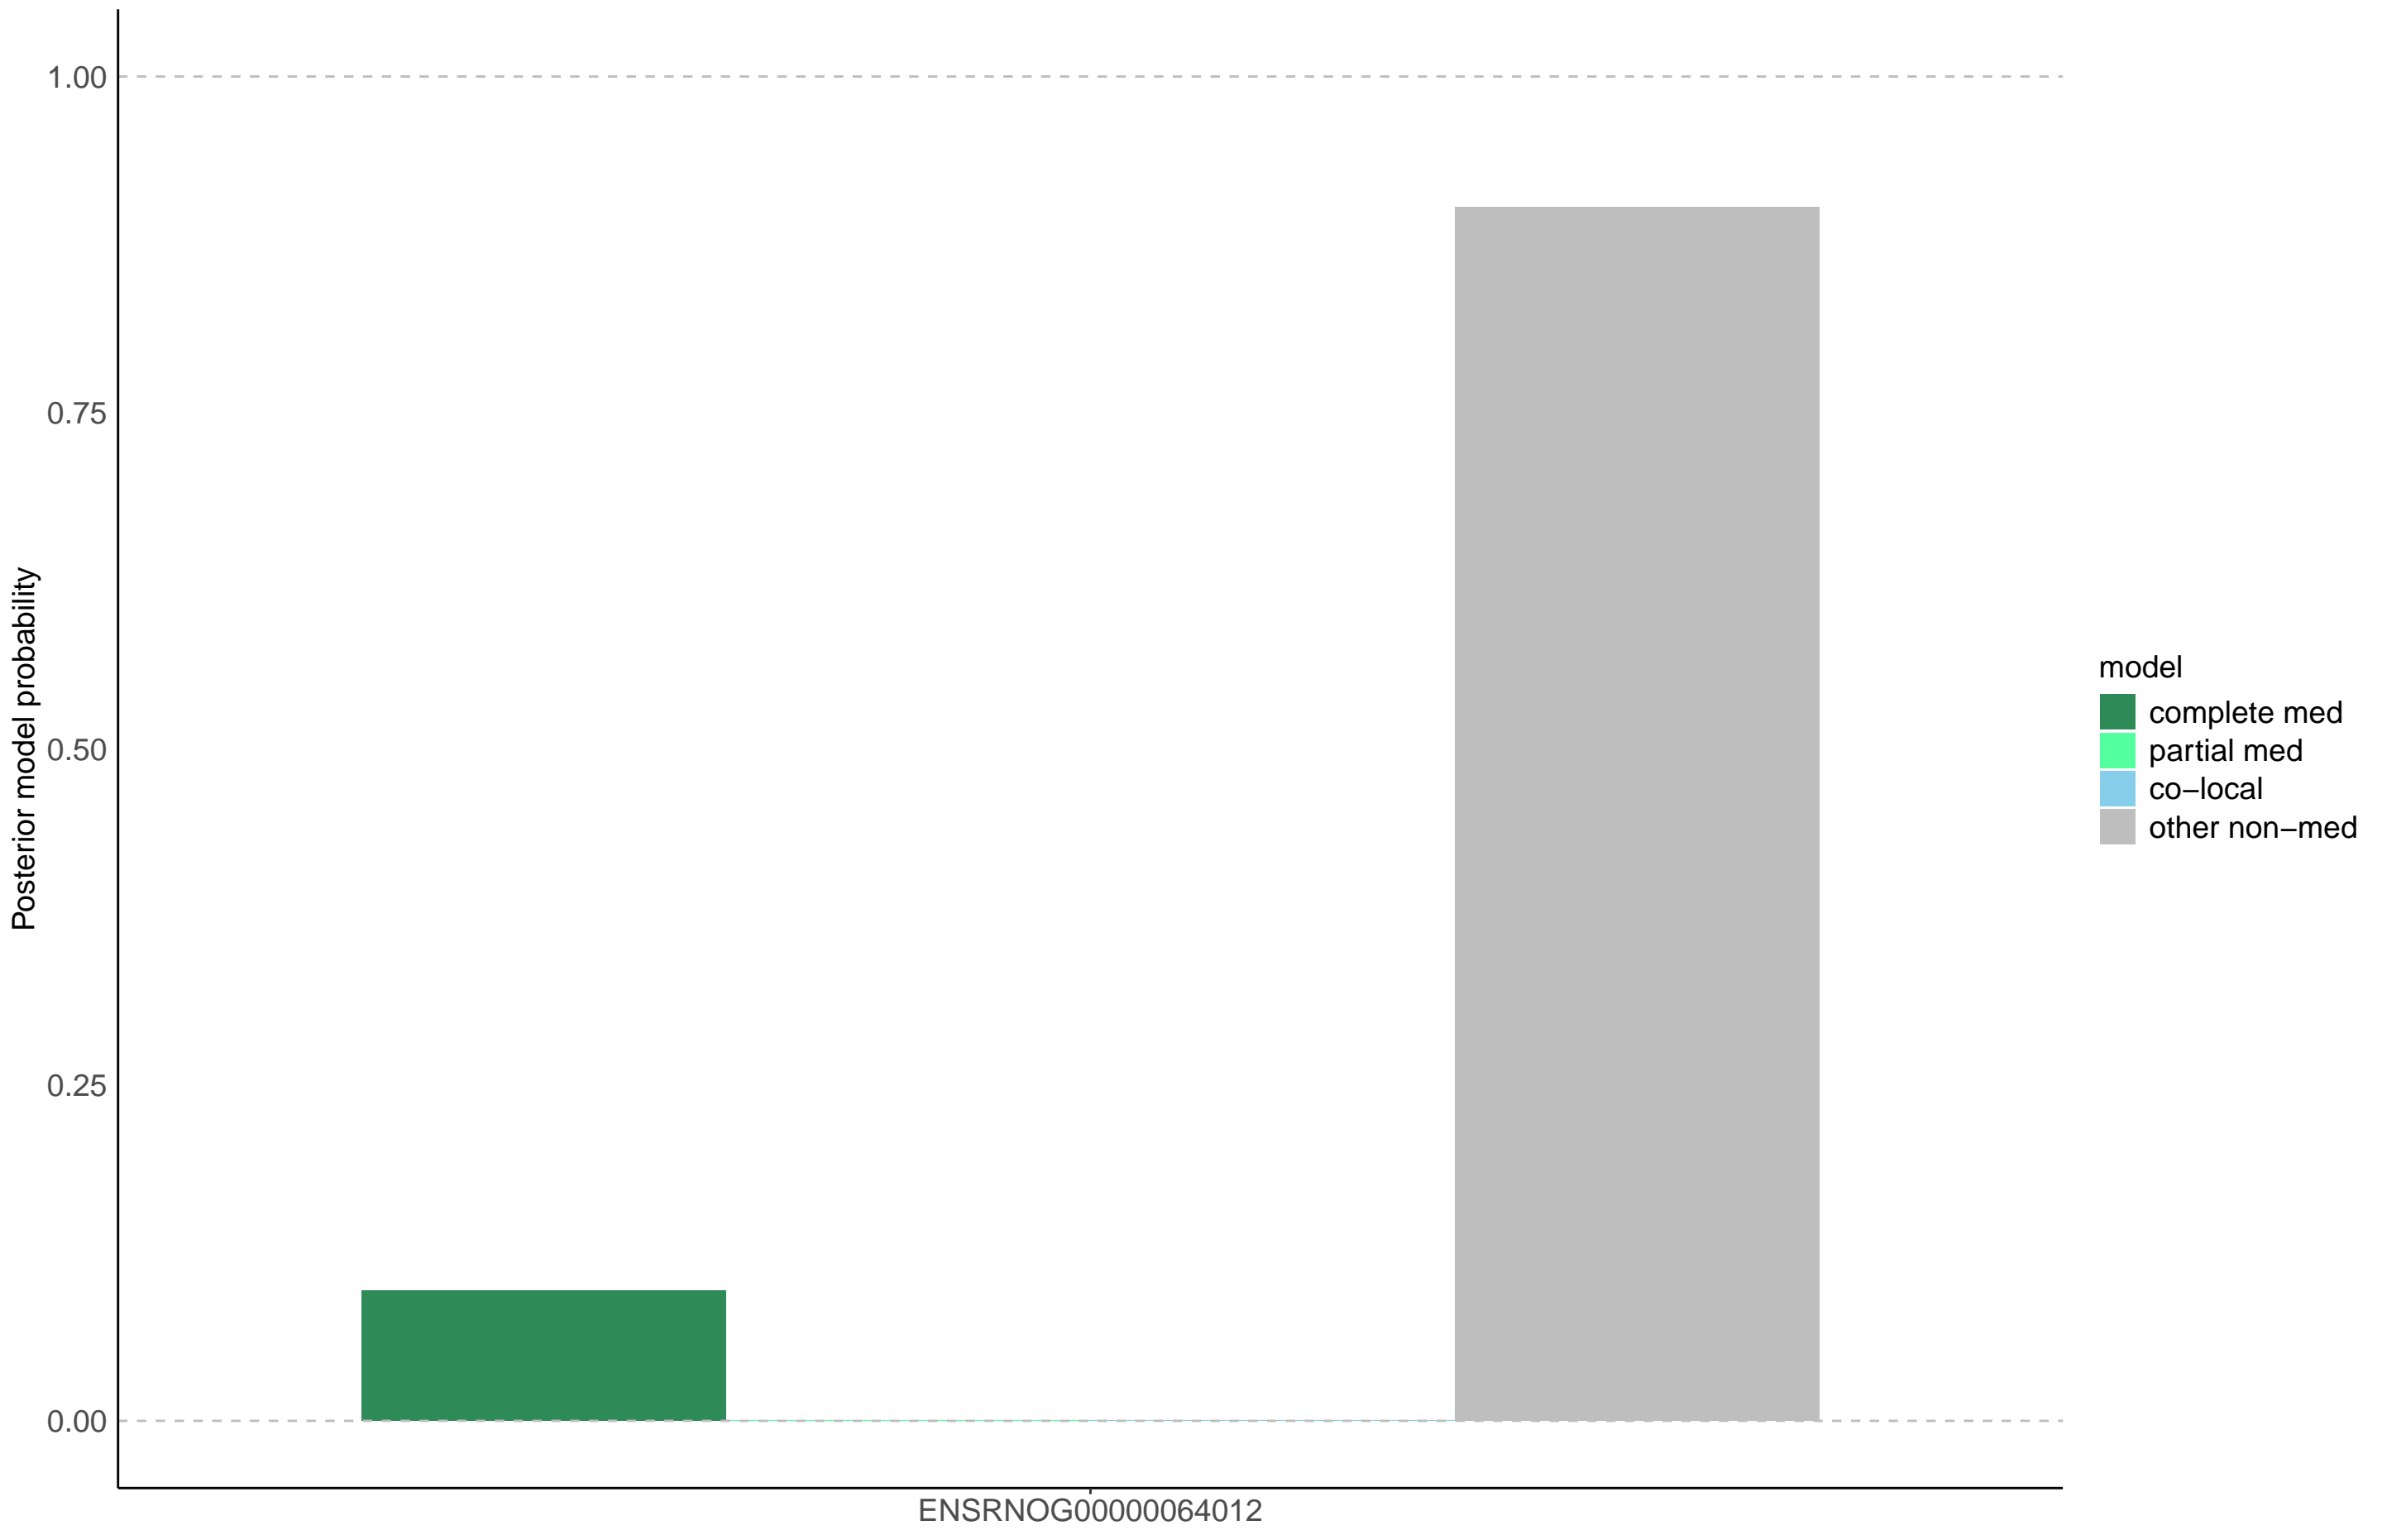

GonadalFat-chr6\_27064422

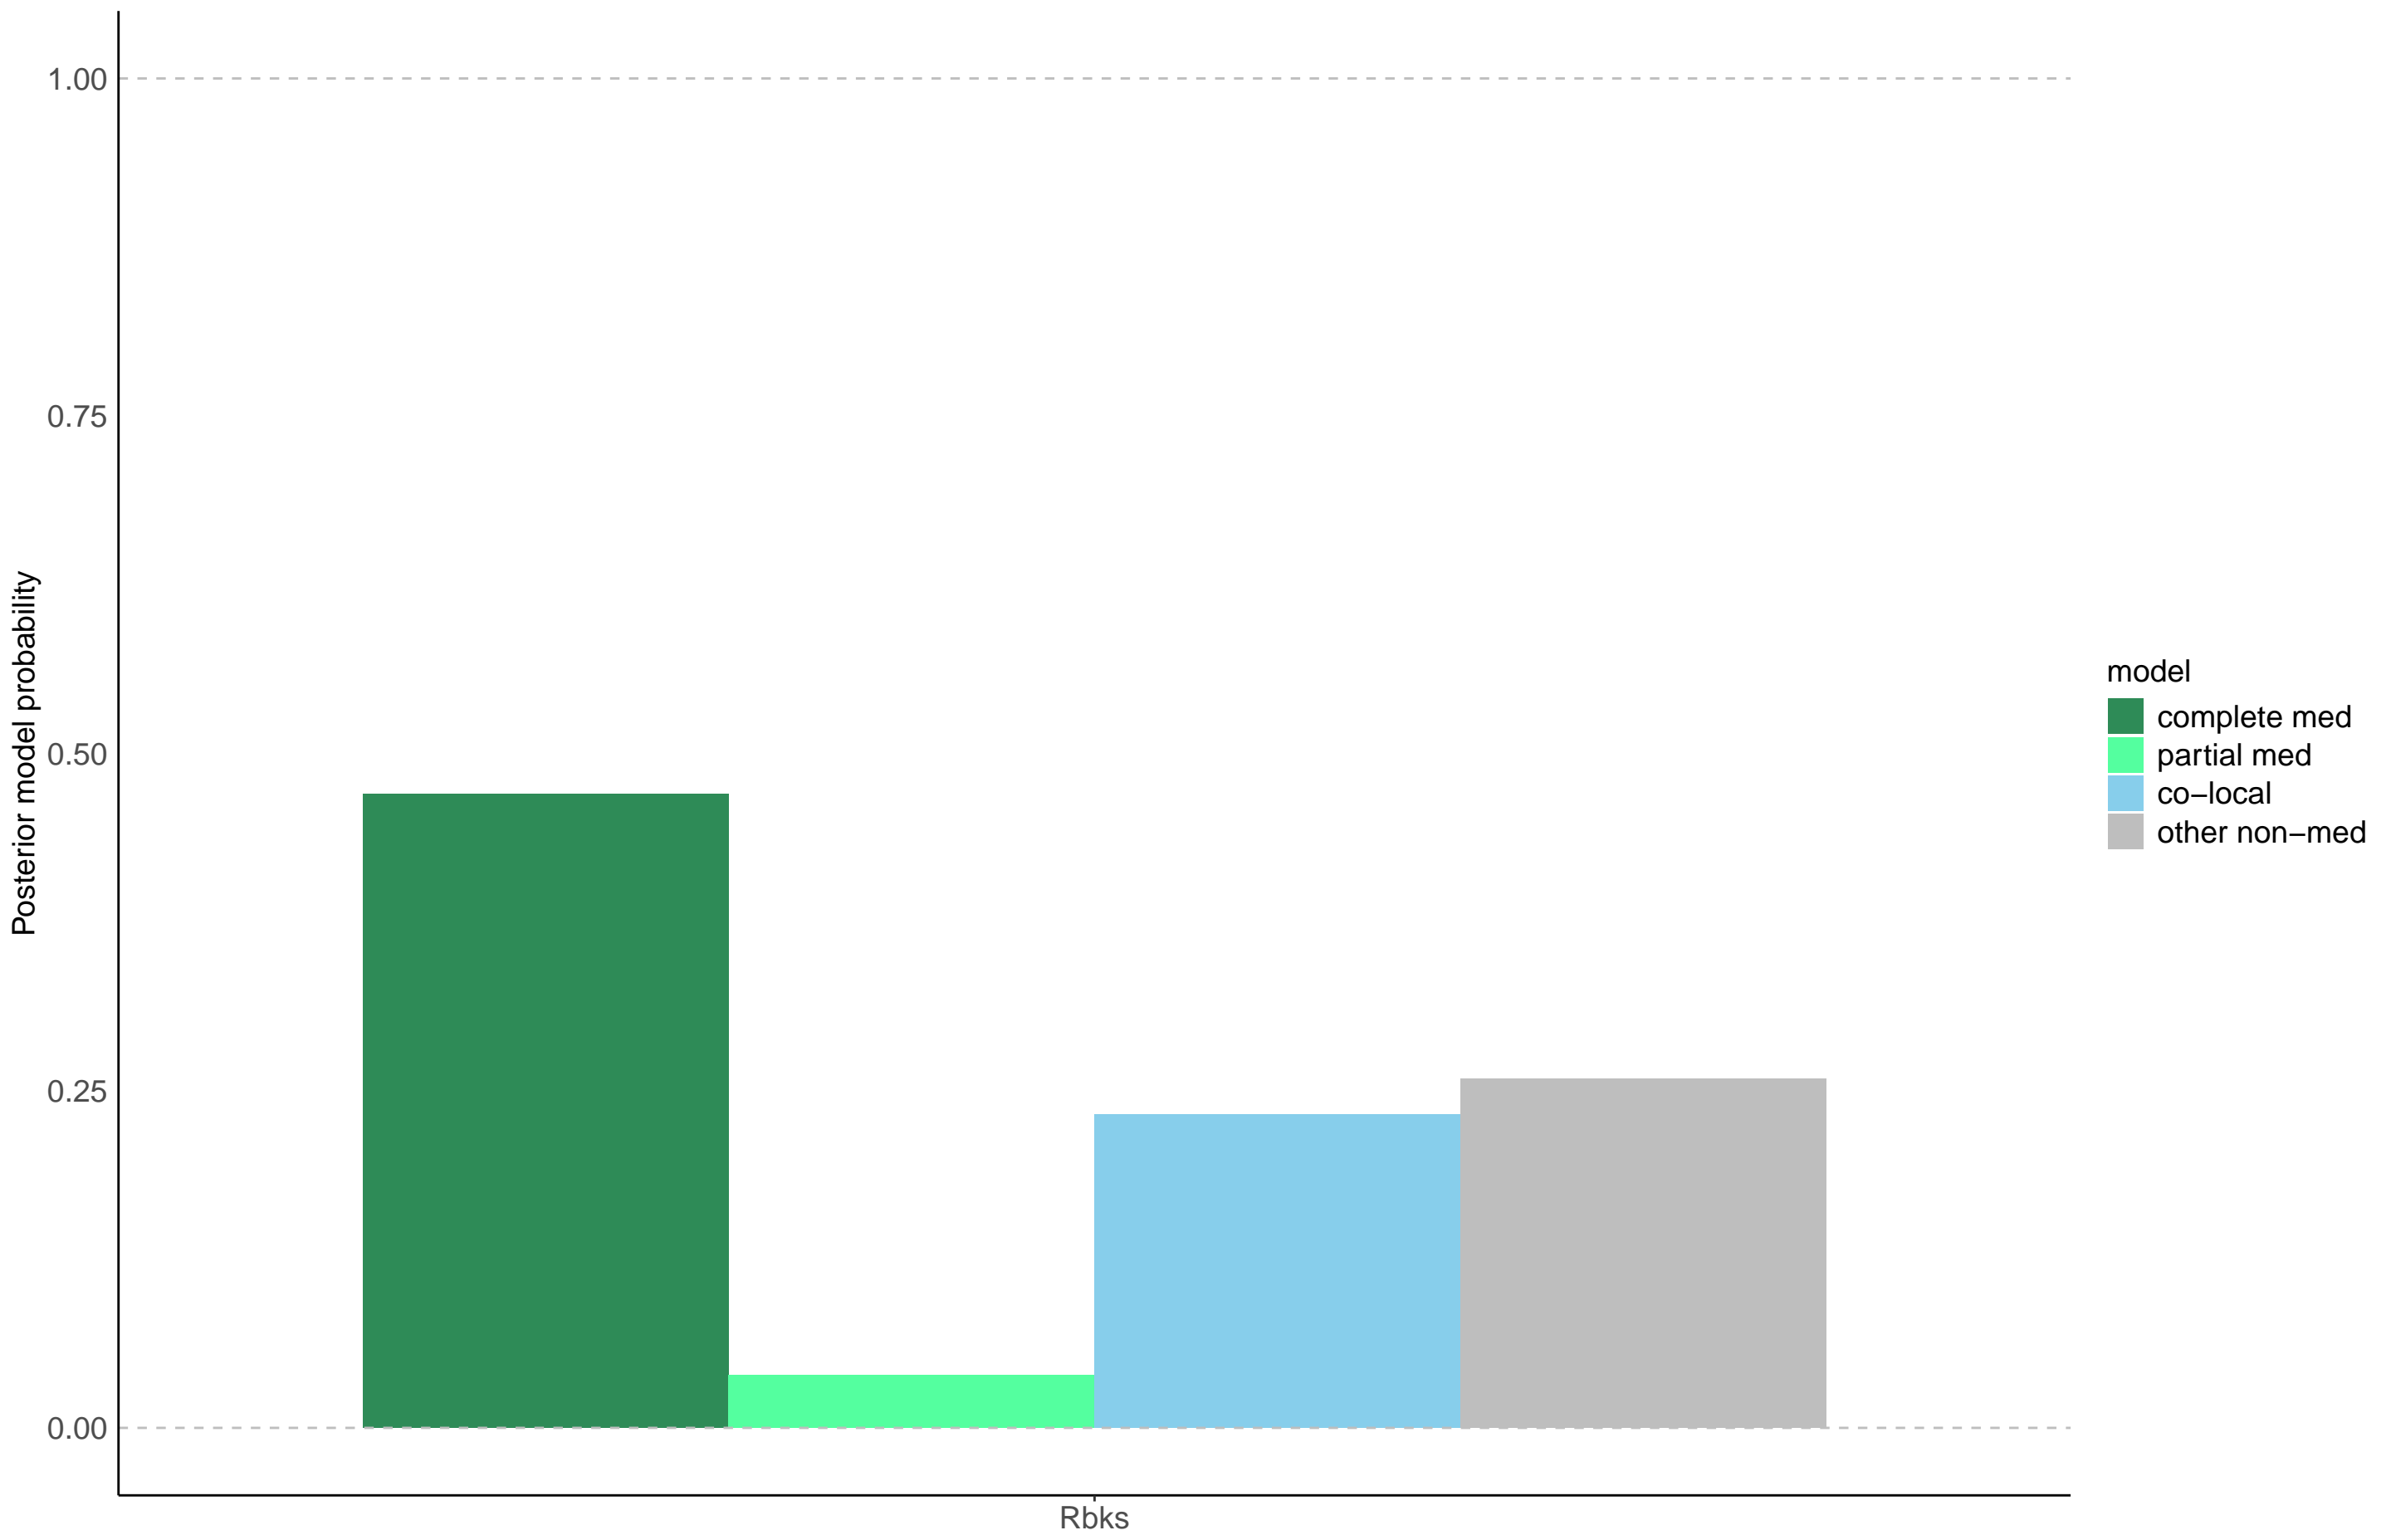

GonadalFat/BW-chr6\_27064422

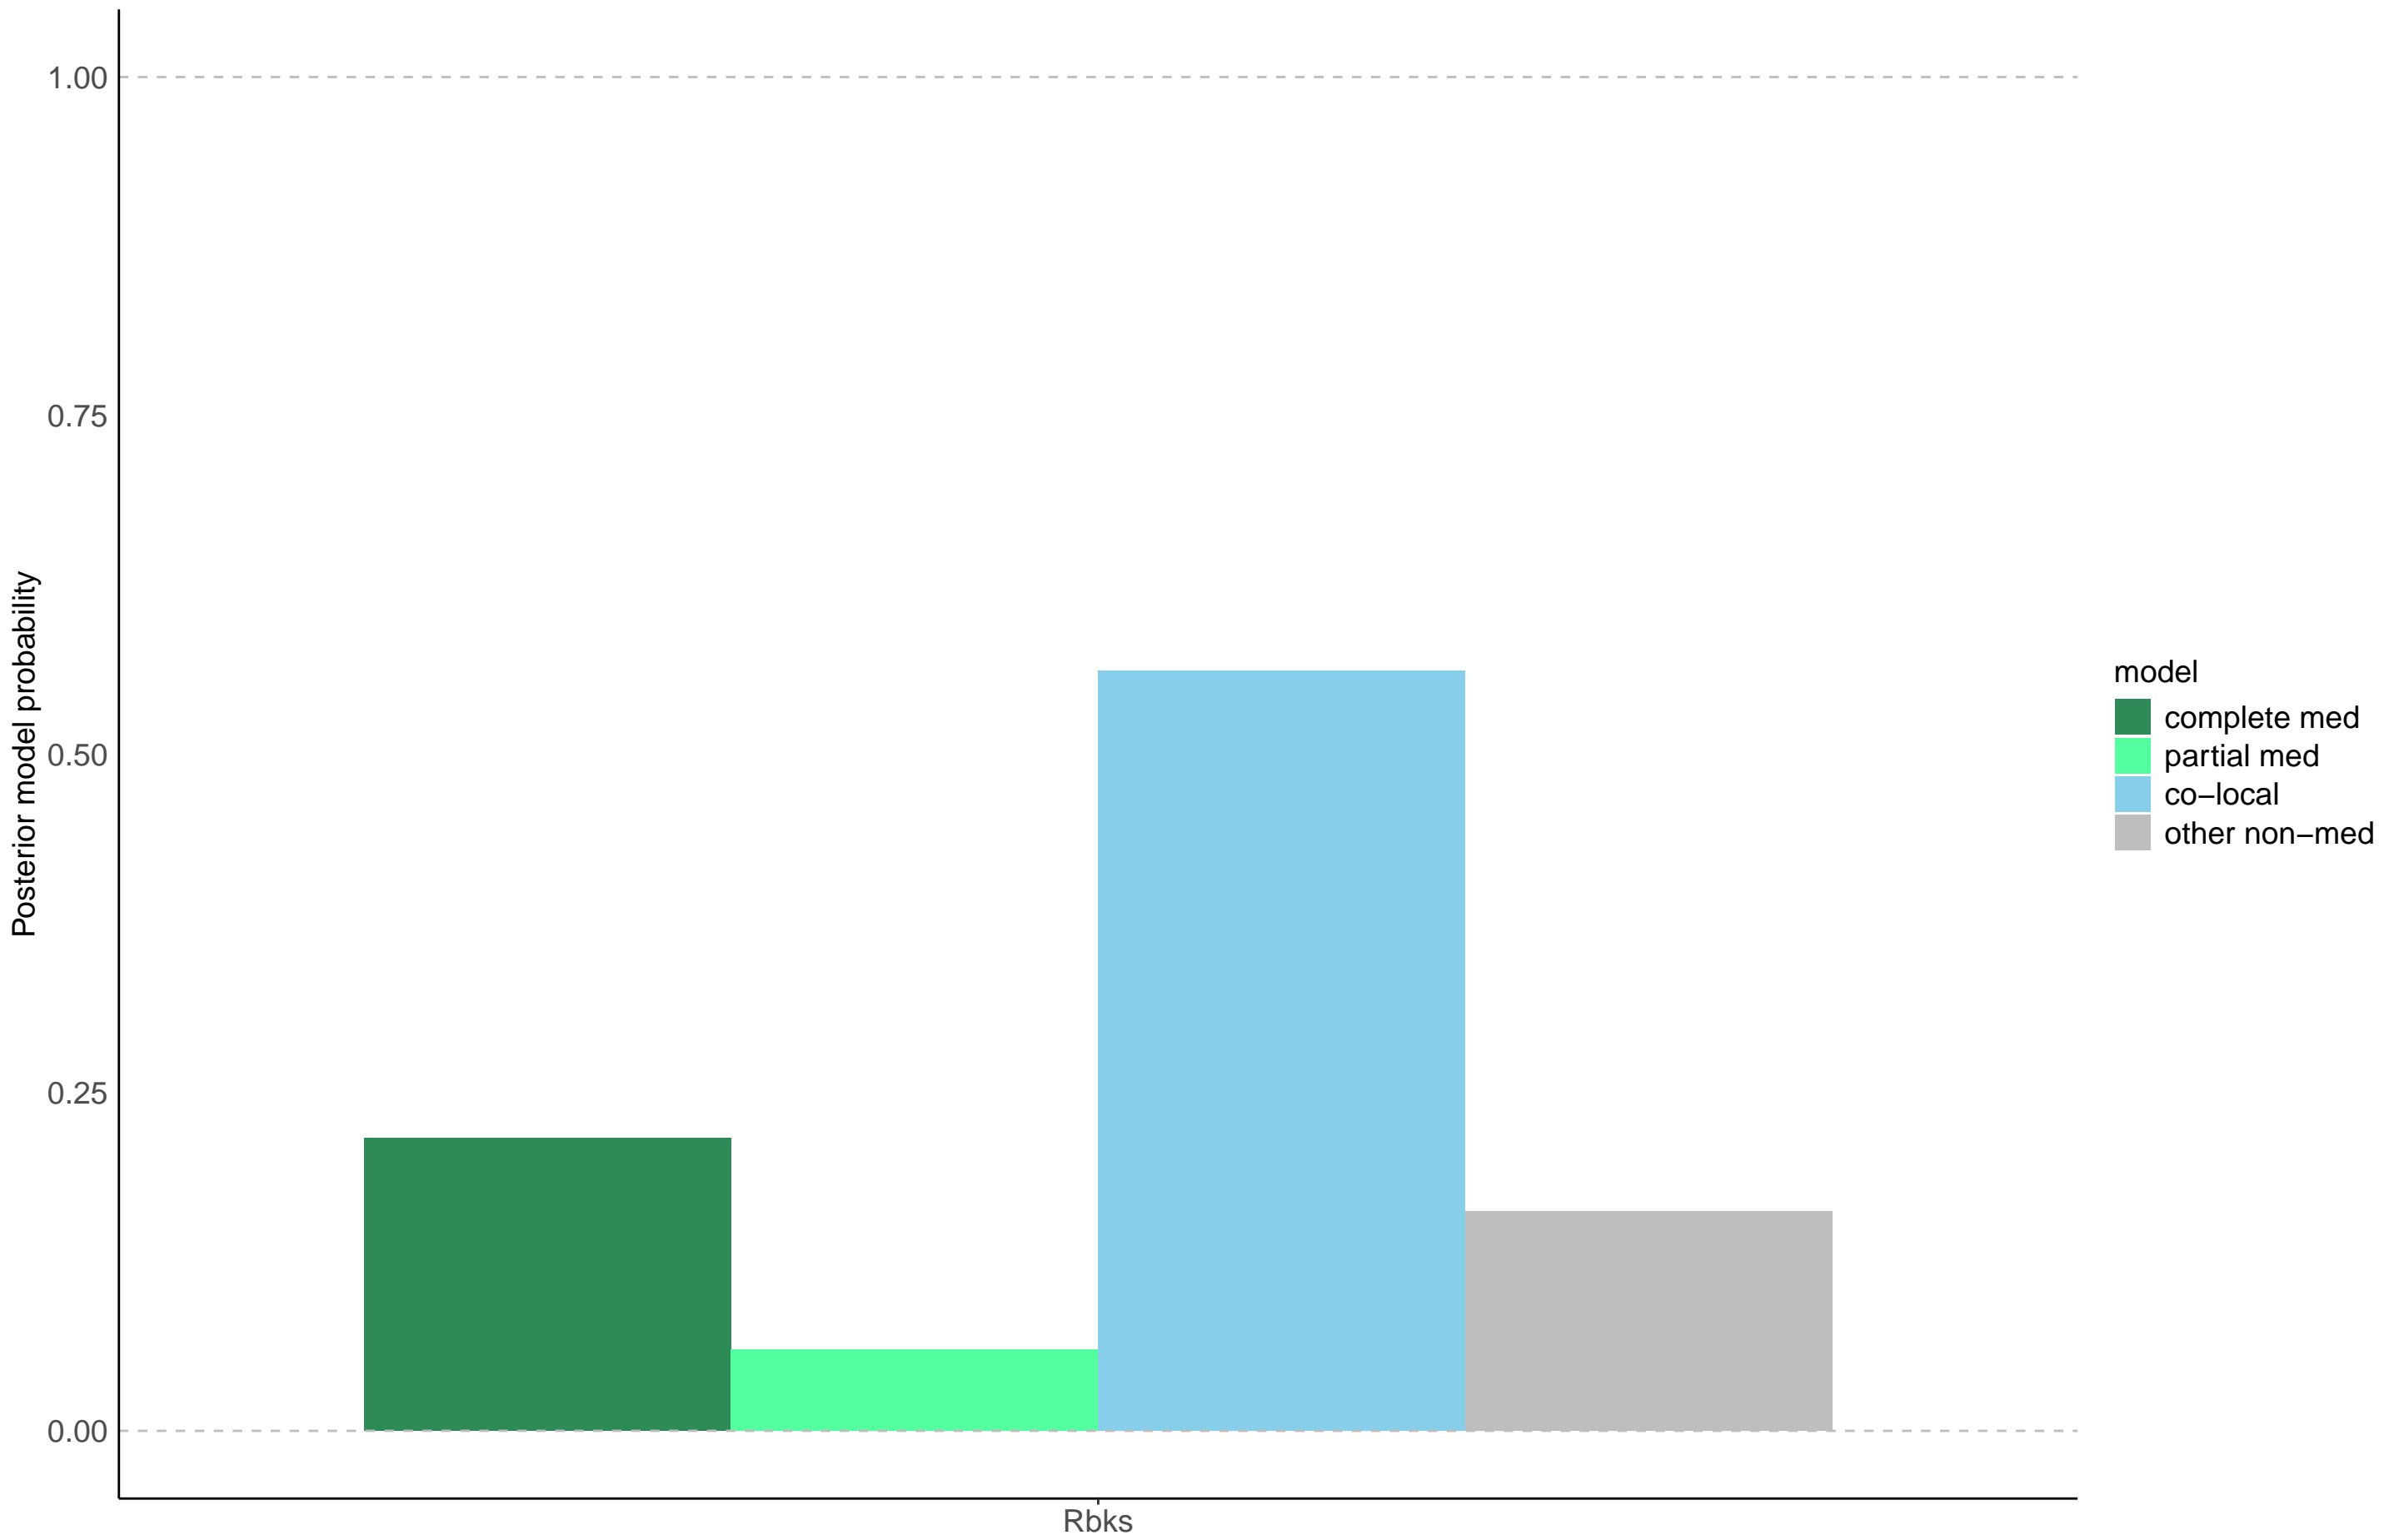

# FatMassDelta-chr6\_27013988

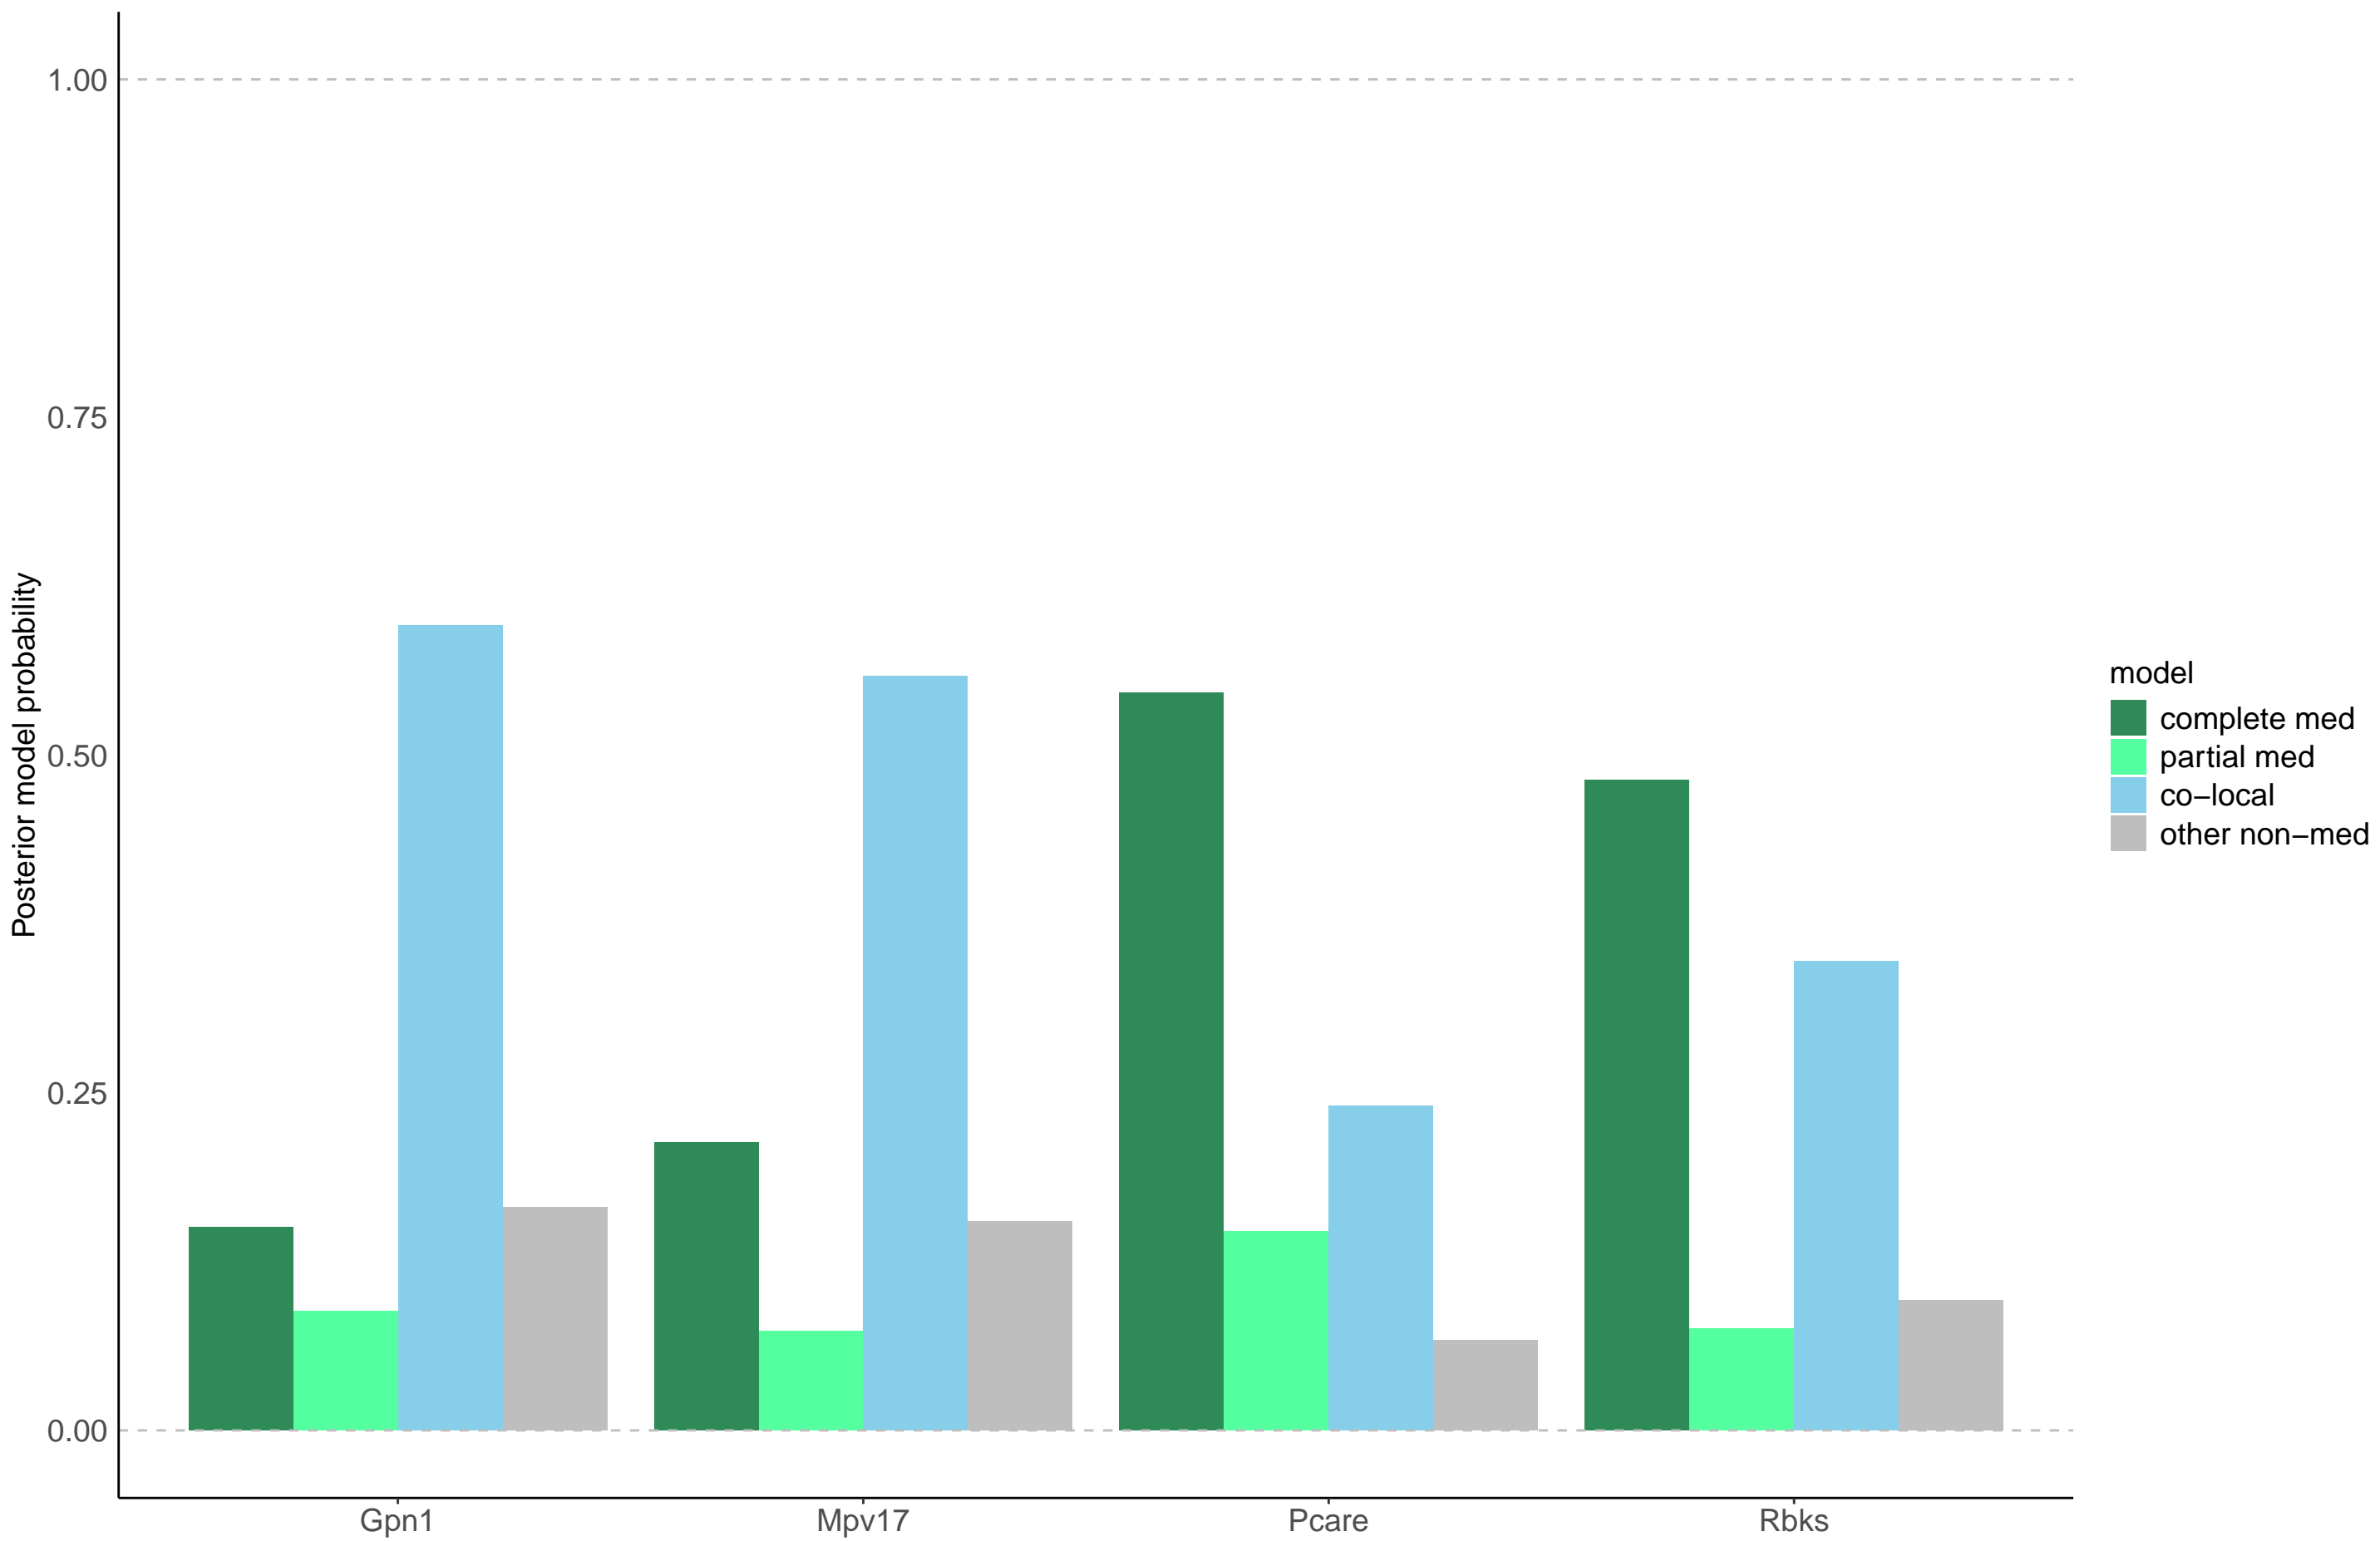

%FatMassDelta-chr6\_23493841

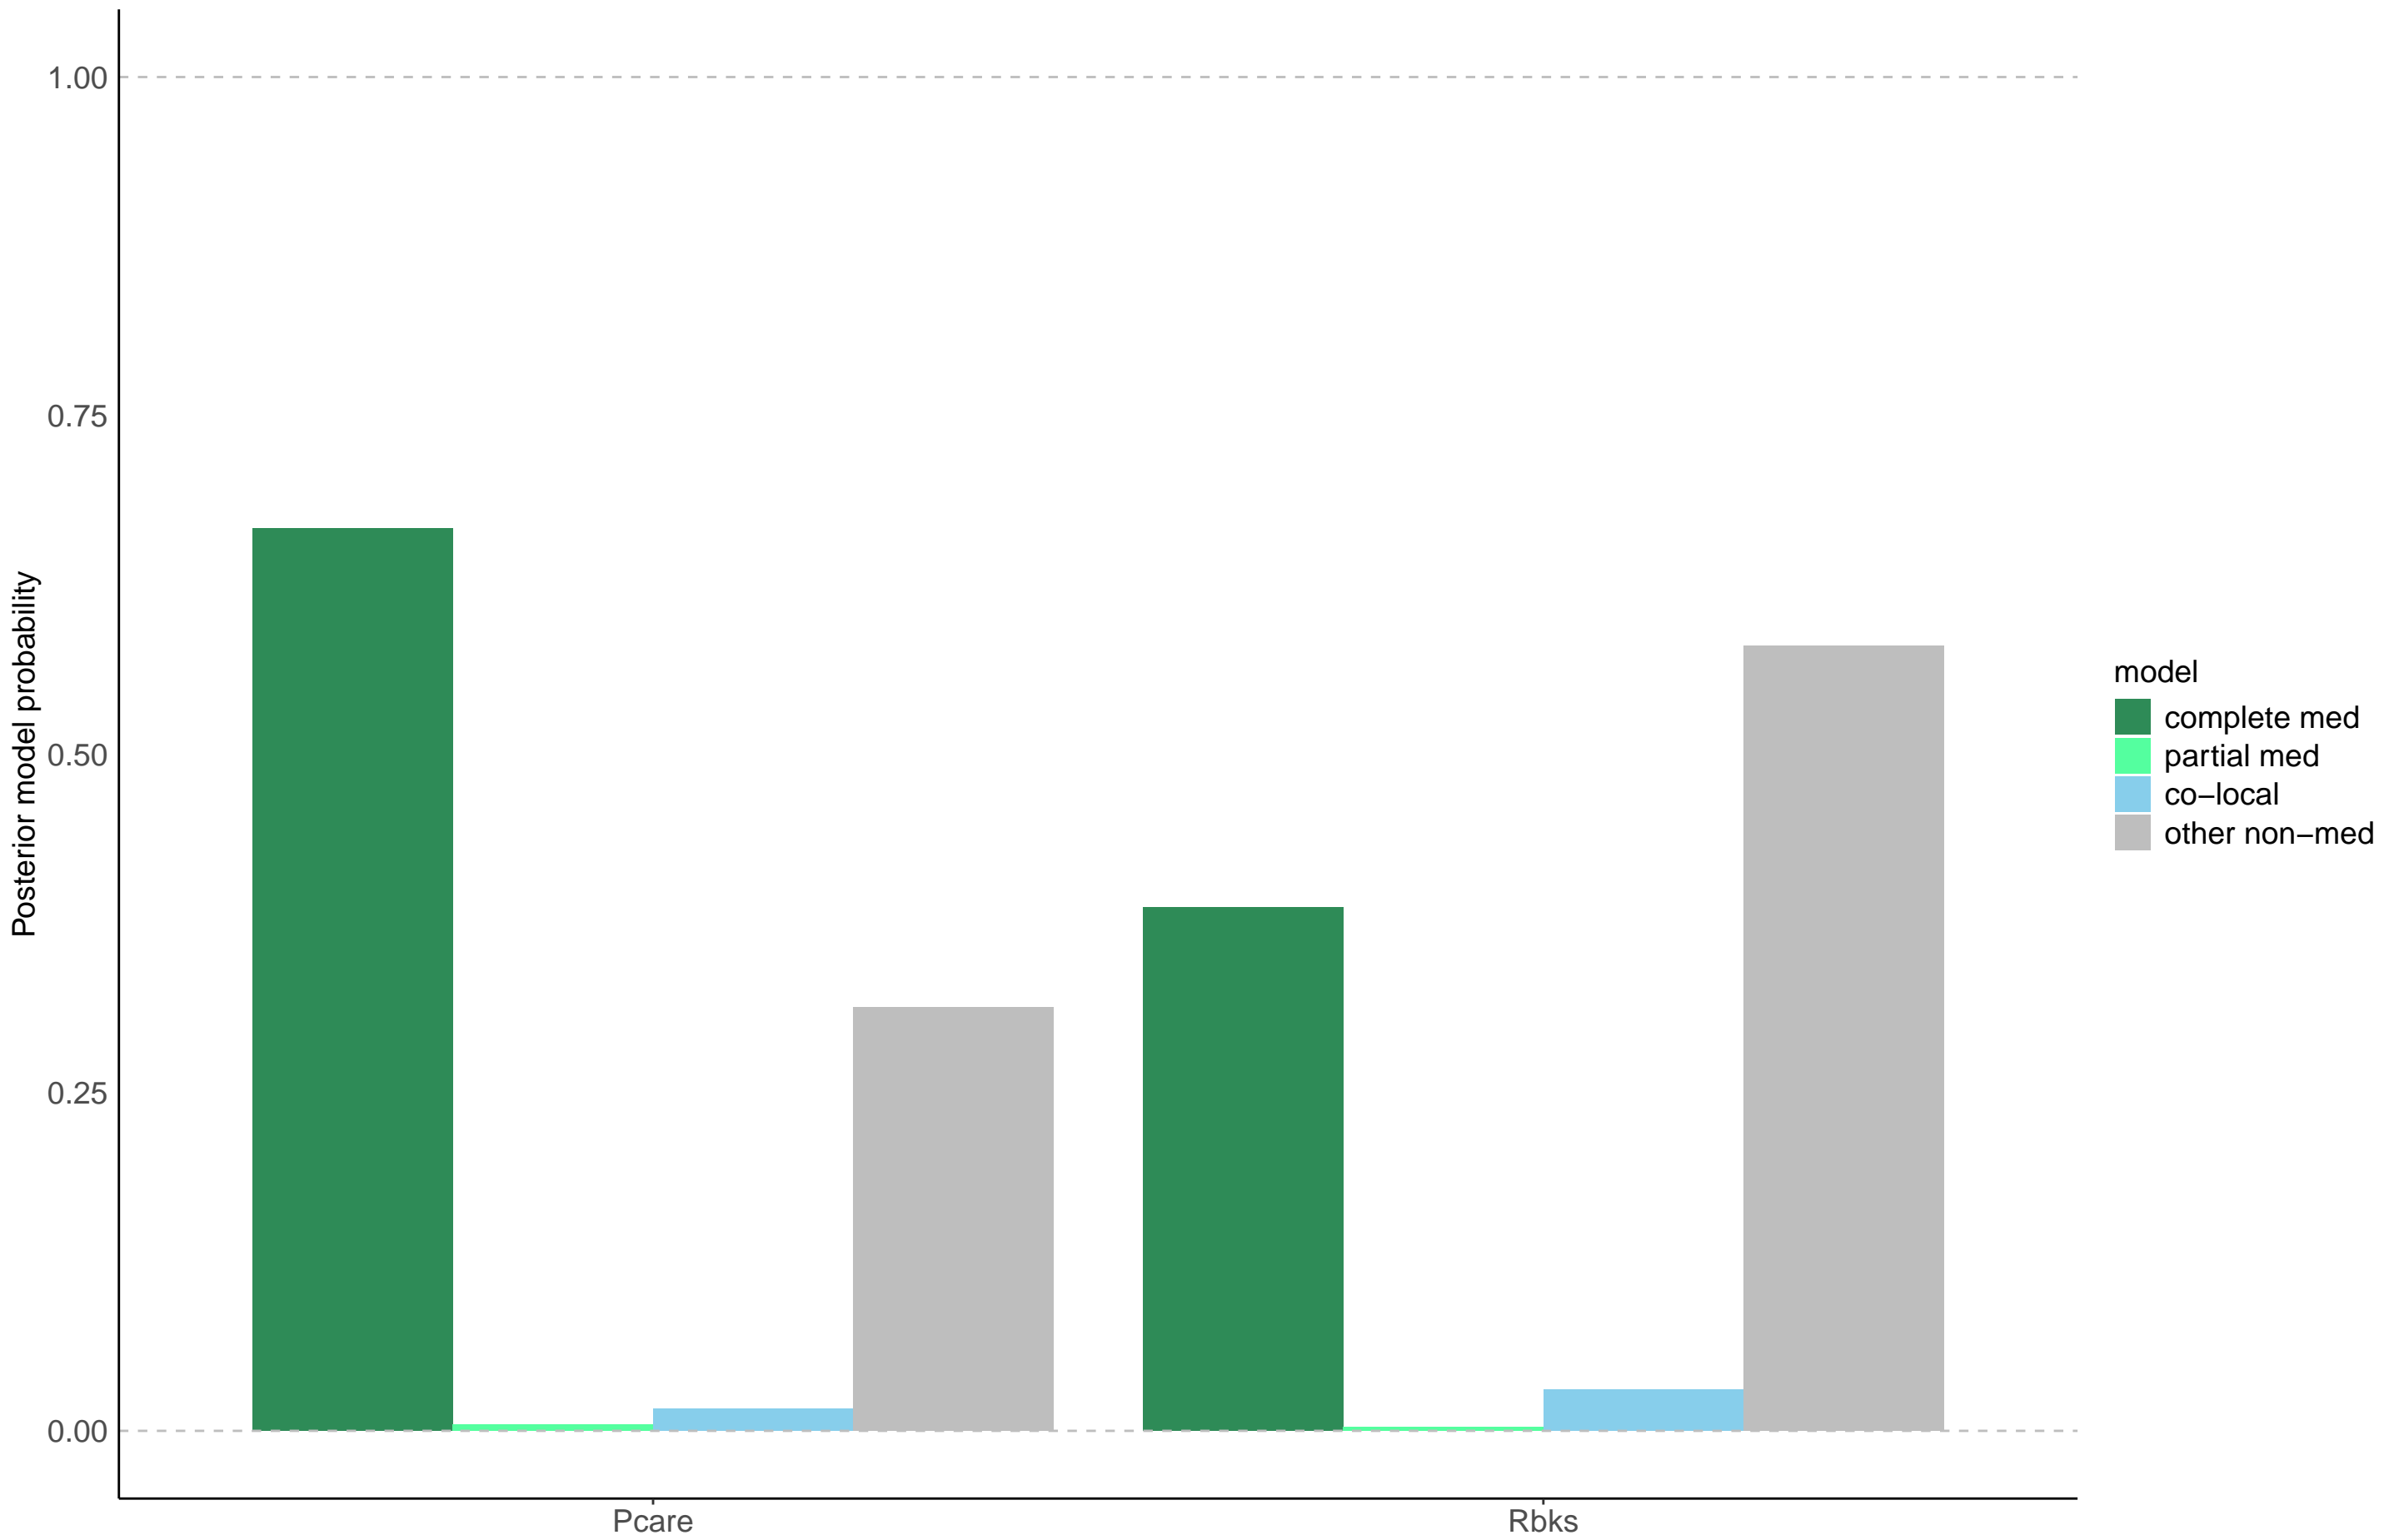

# LeanMass-chr6\_27013988

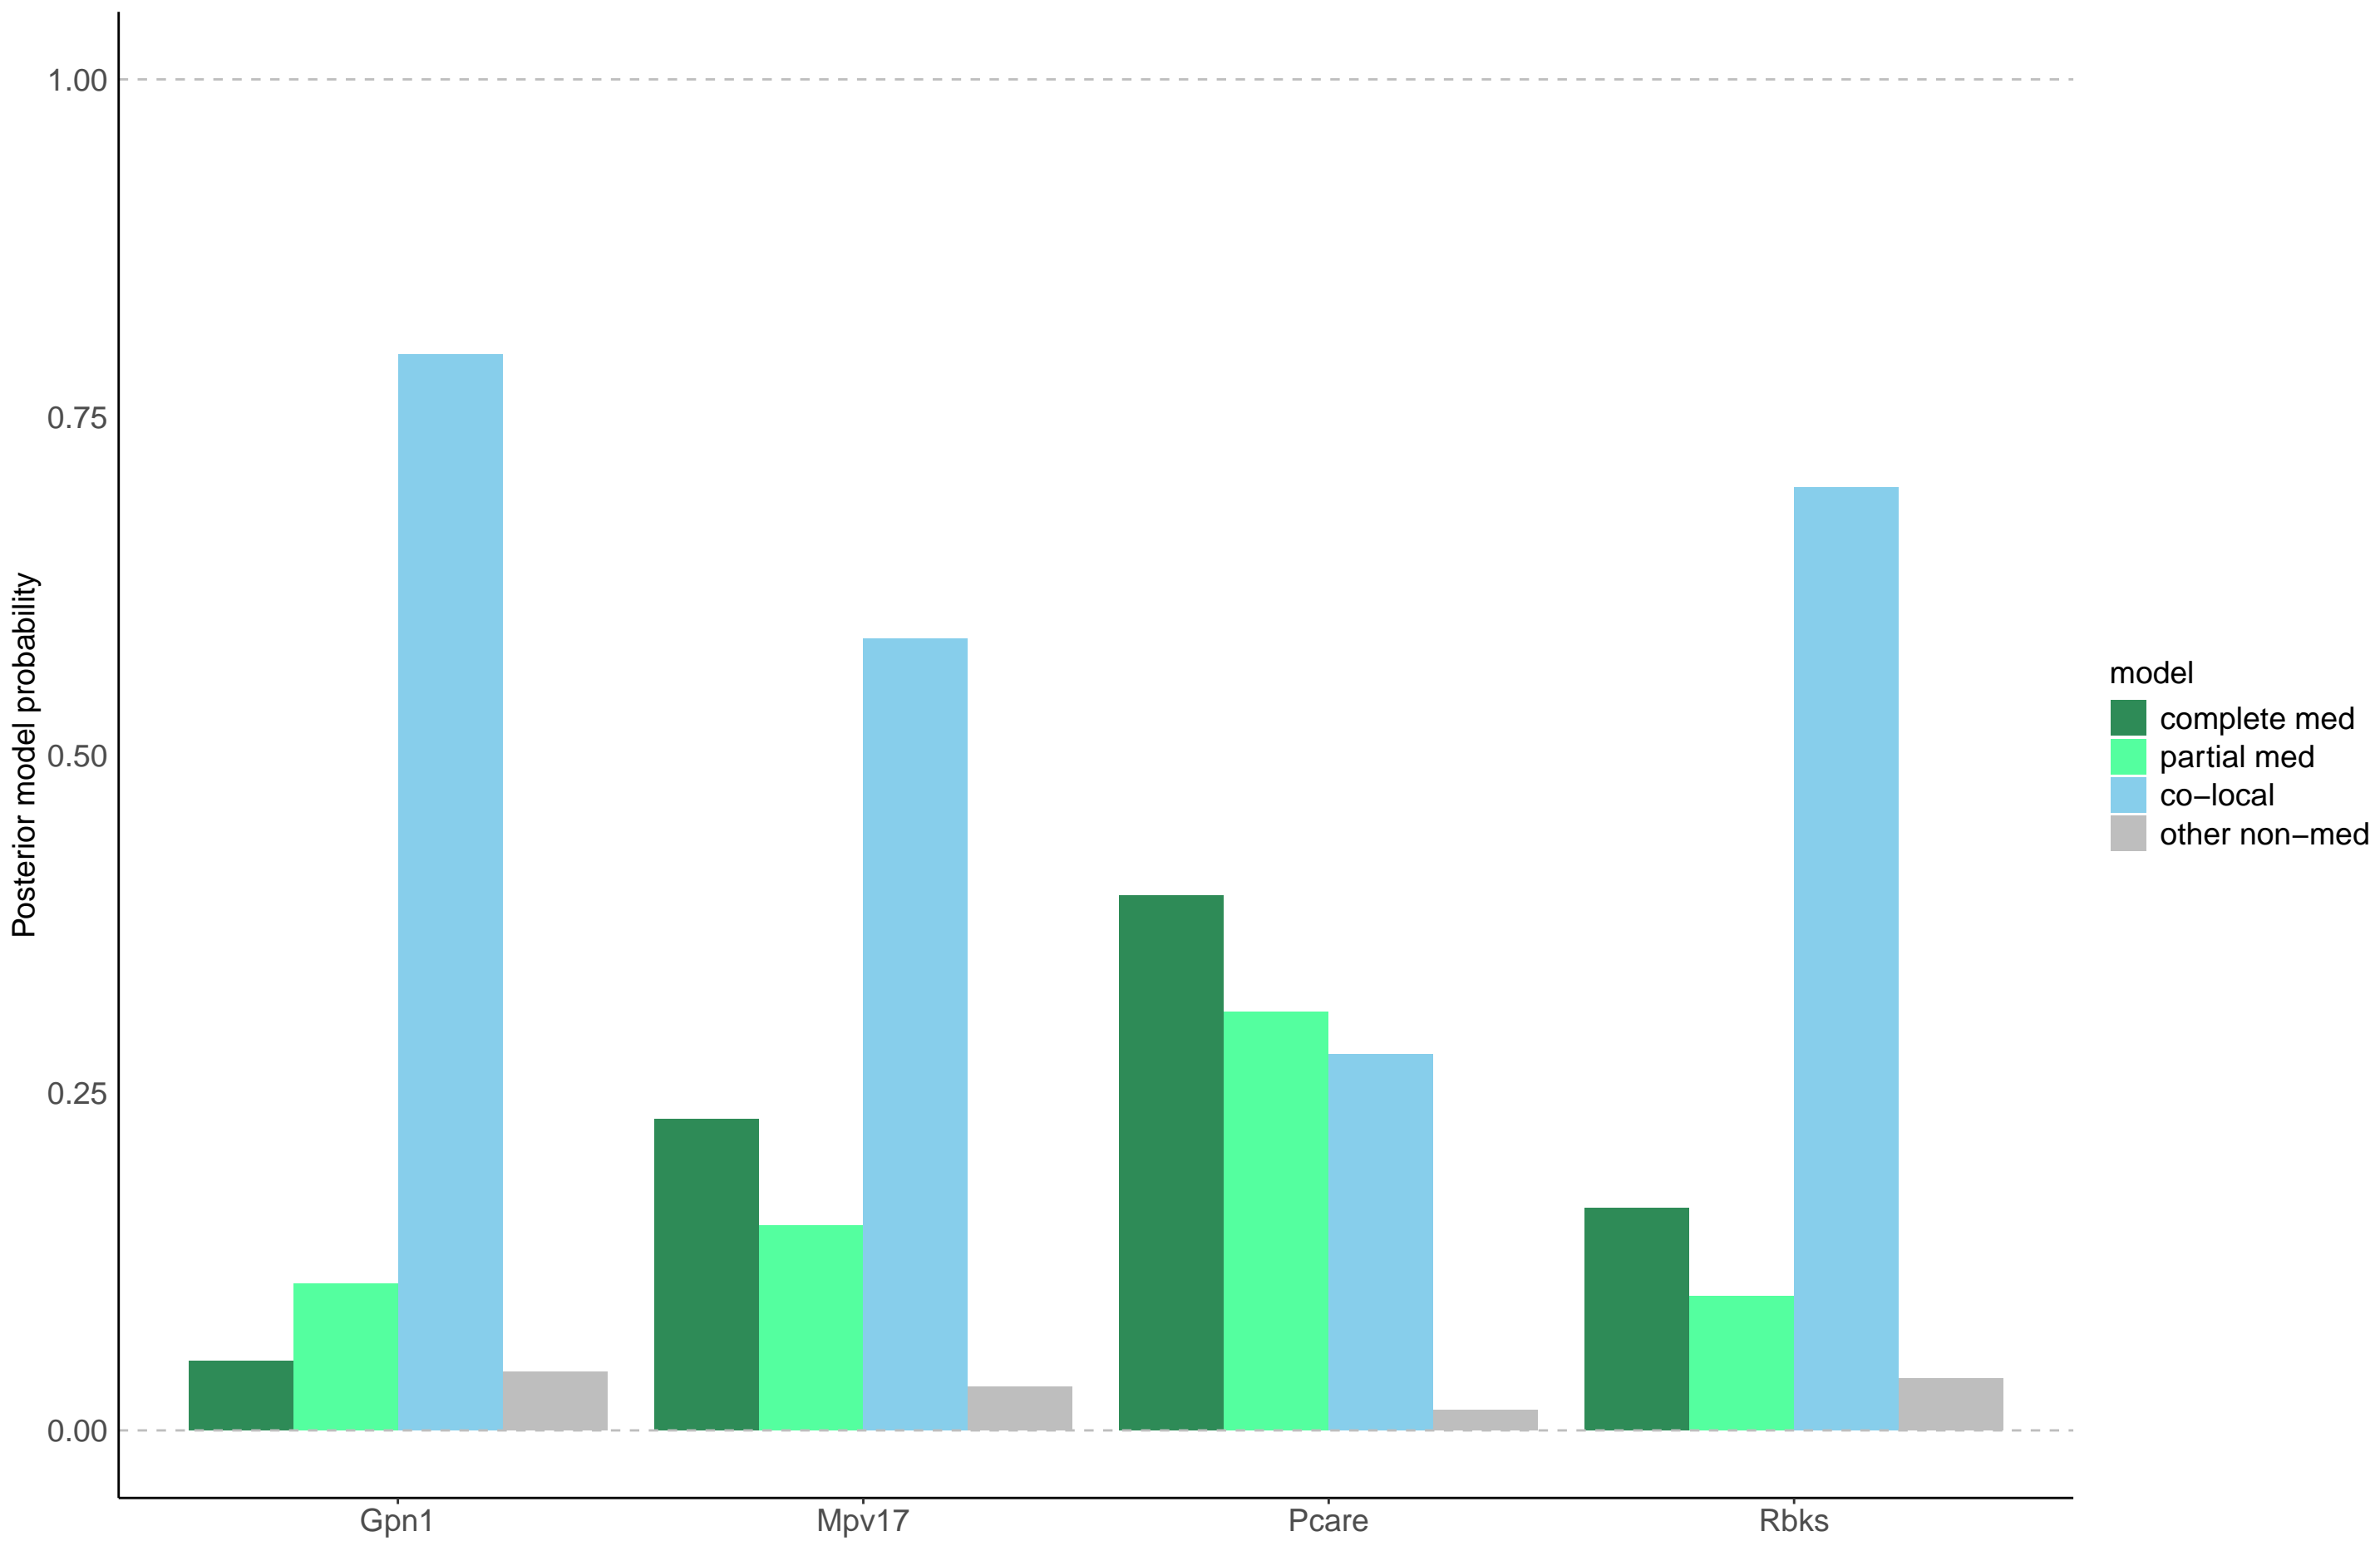

# LeanMassDelta-chr6\_27013988

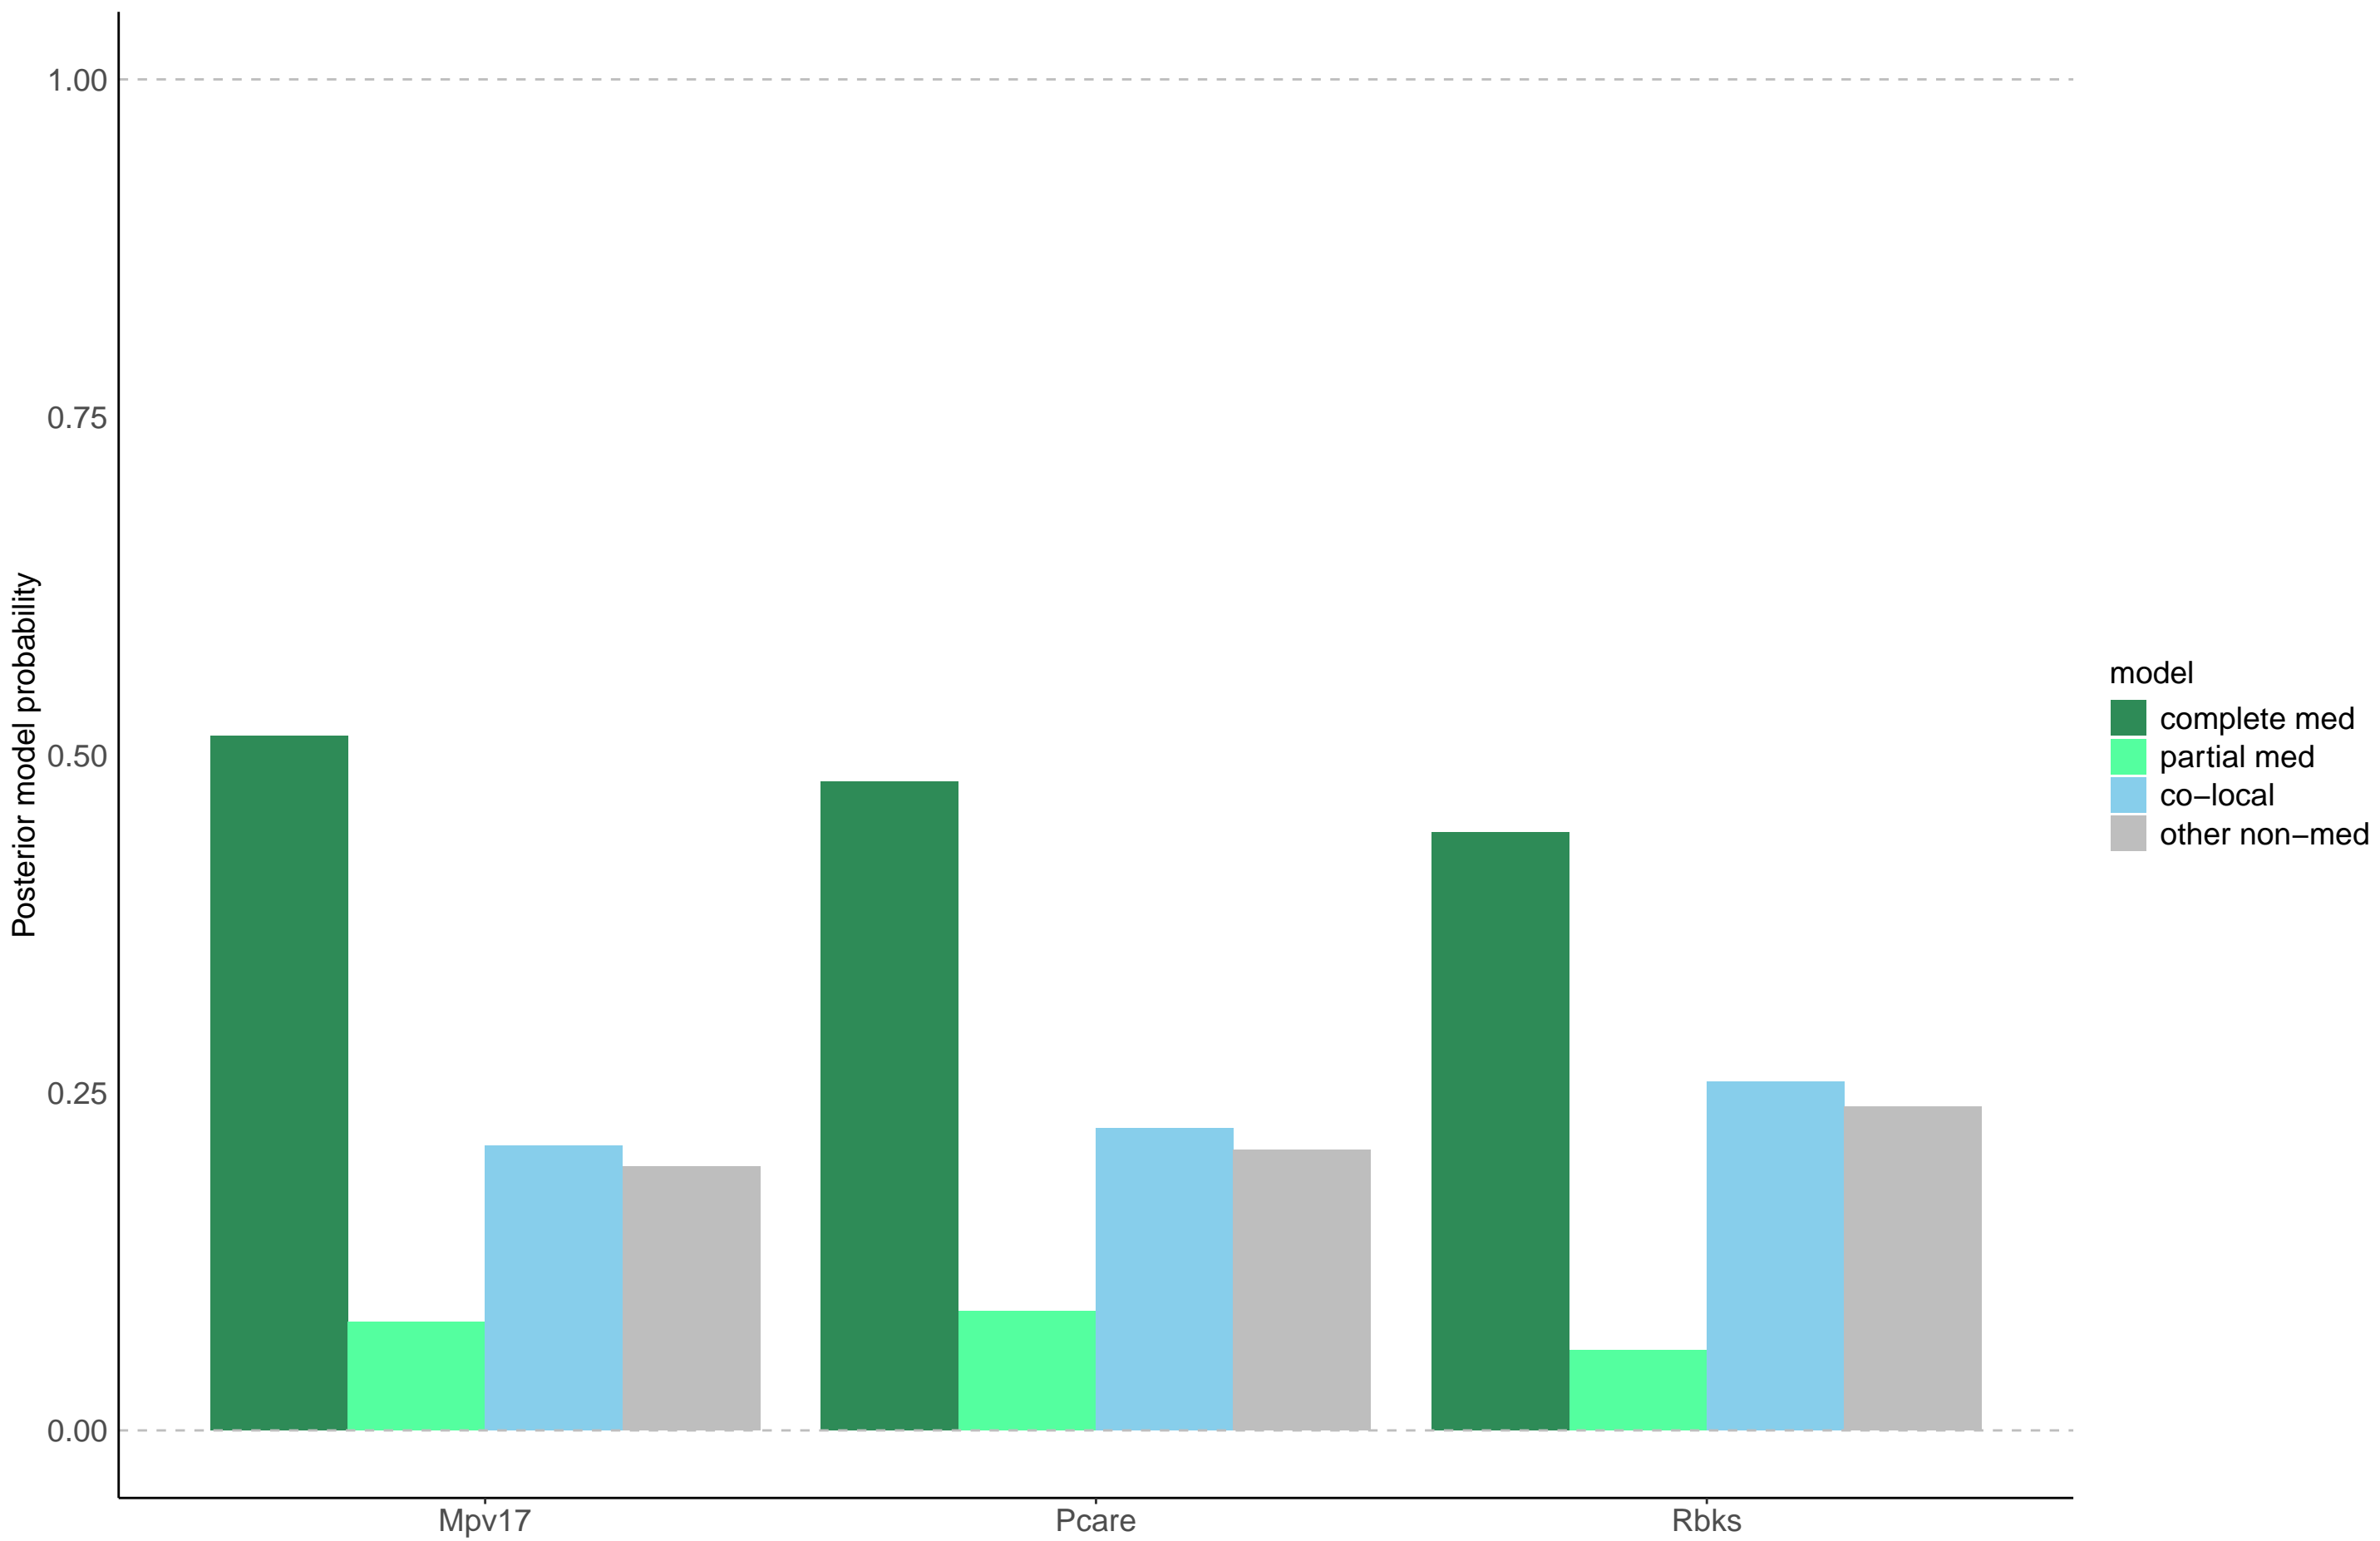

OmenFat-chr6\_27064422

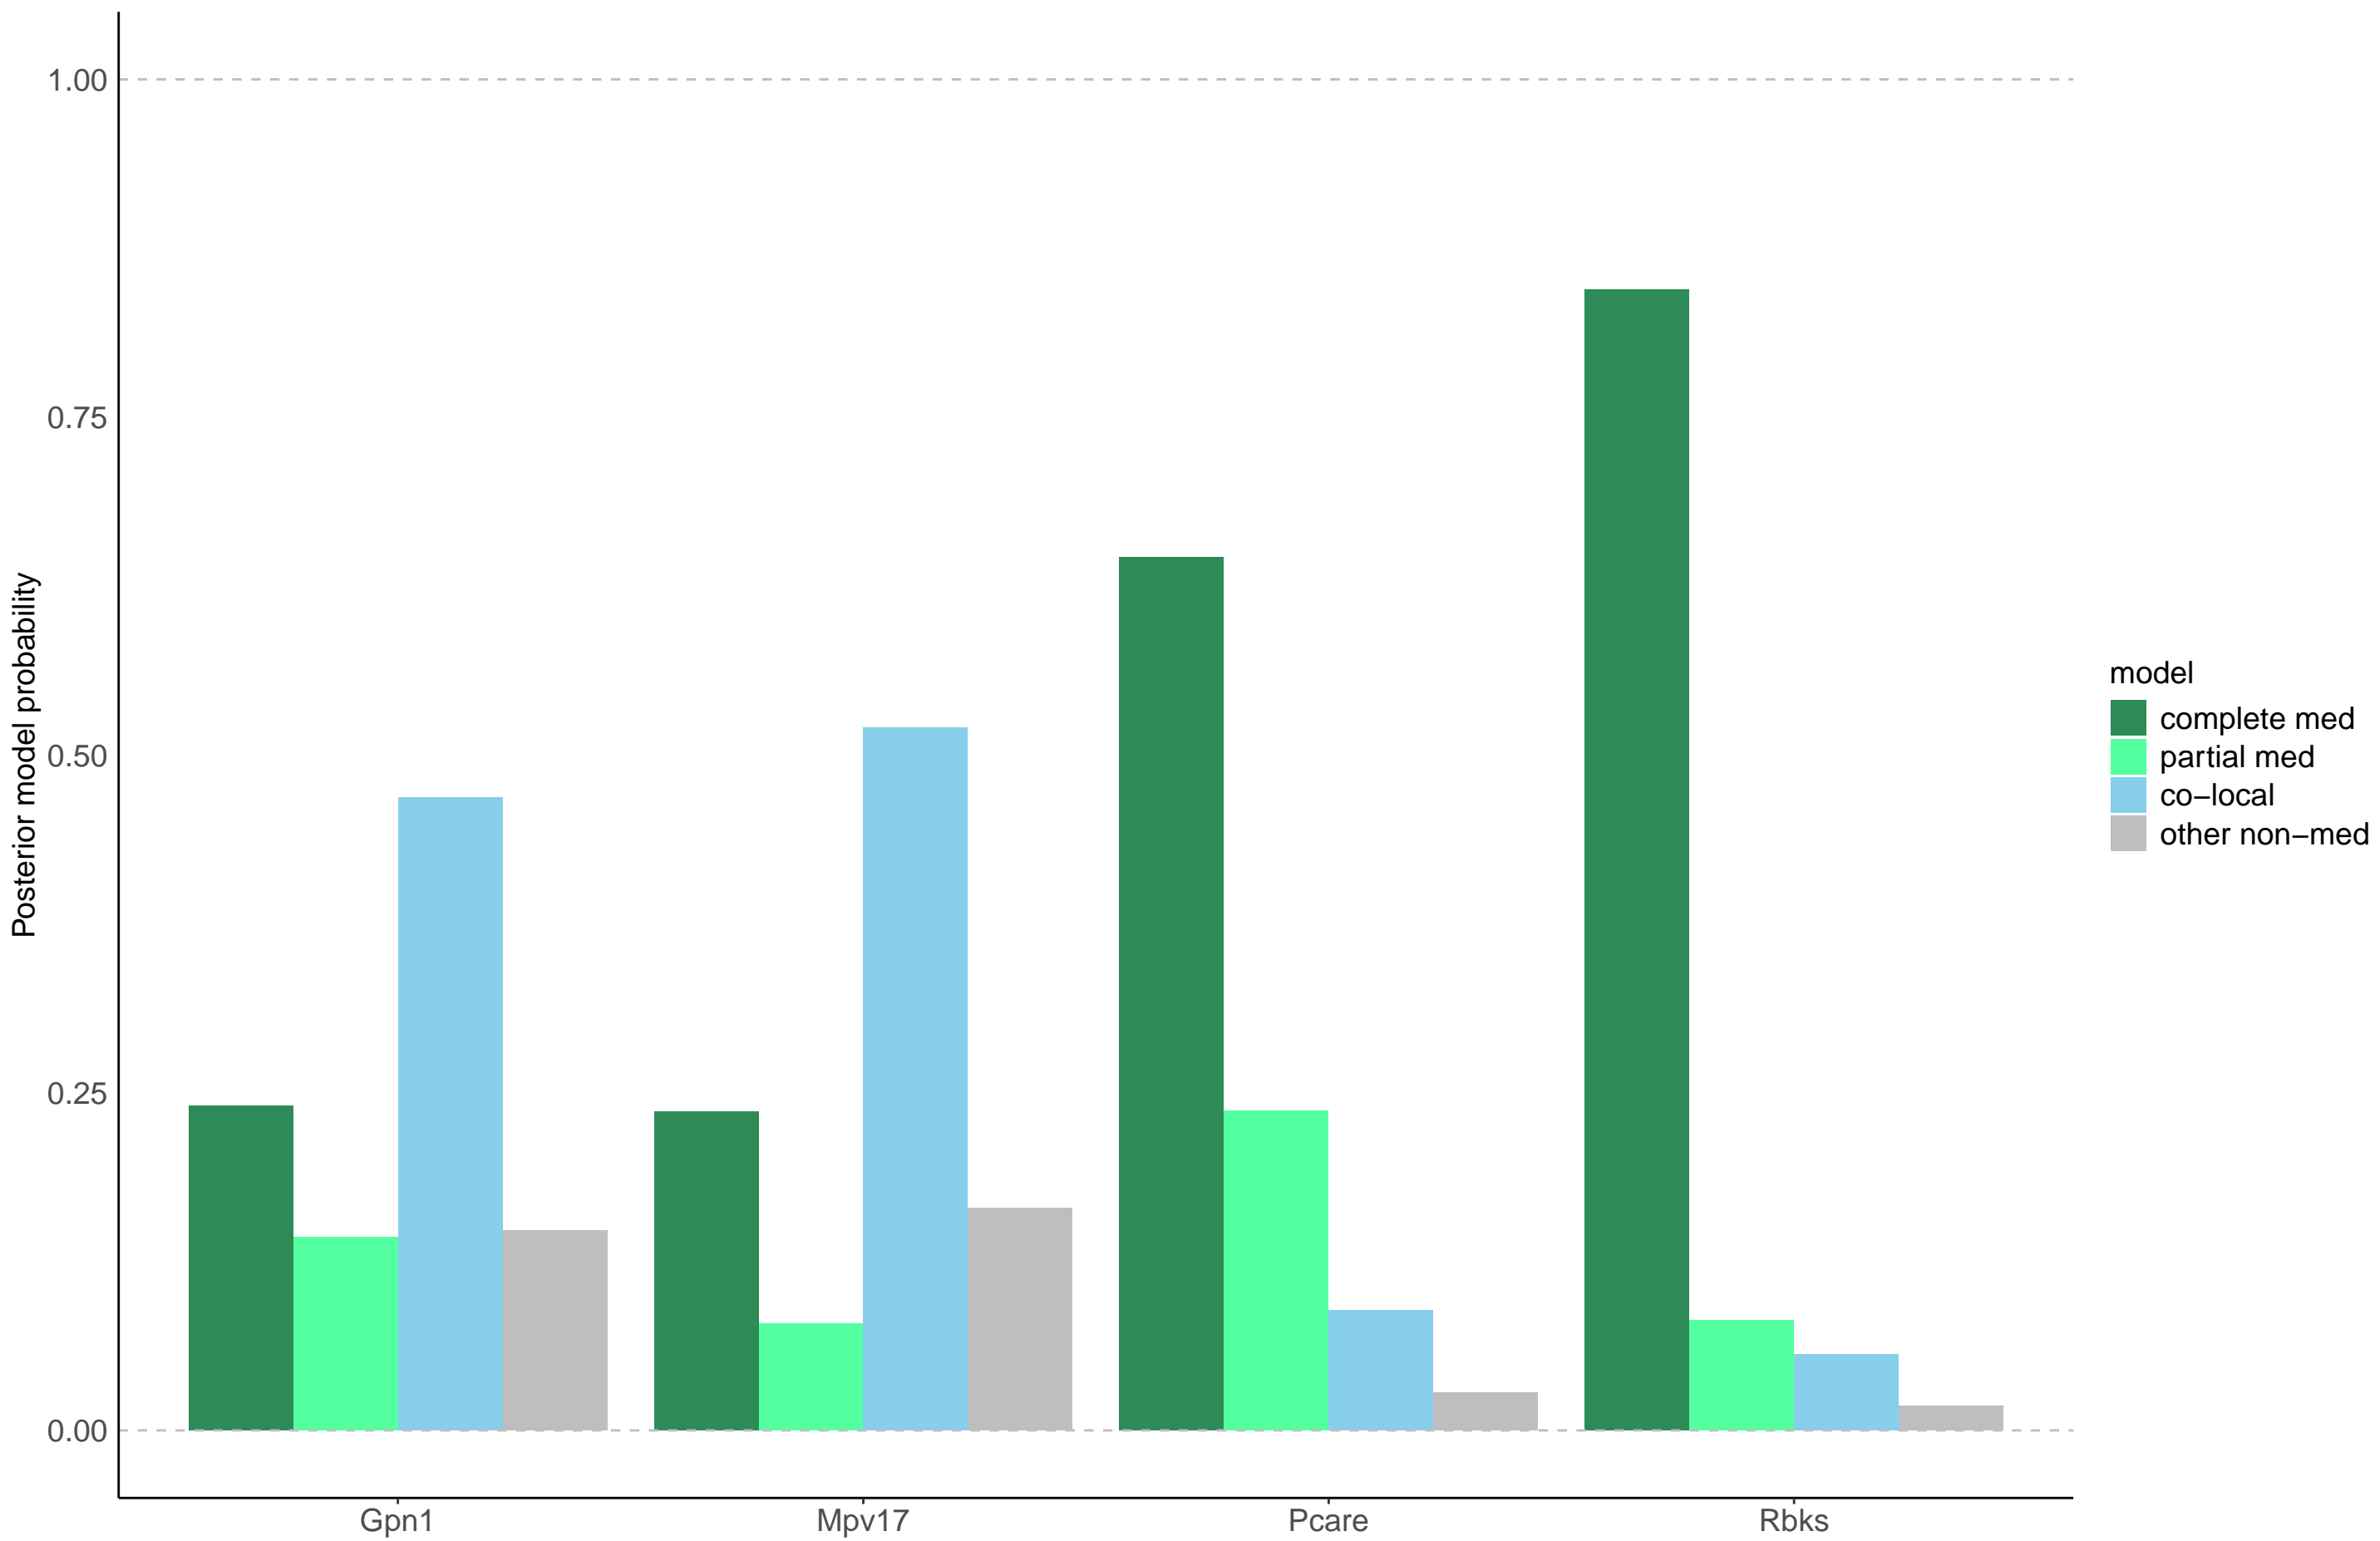

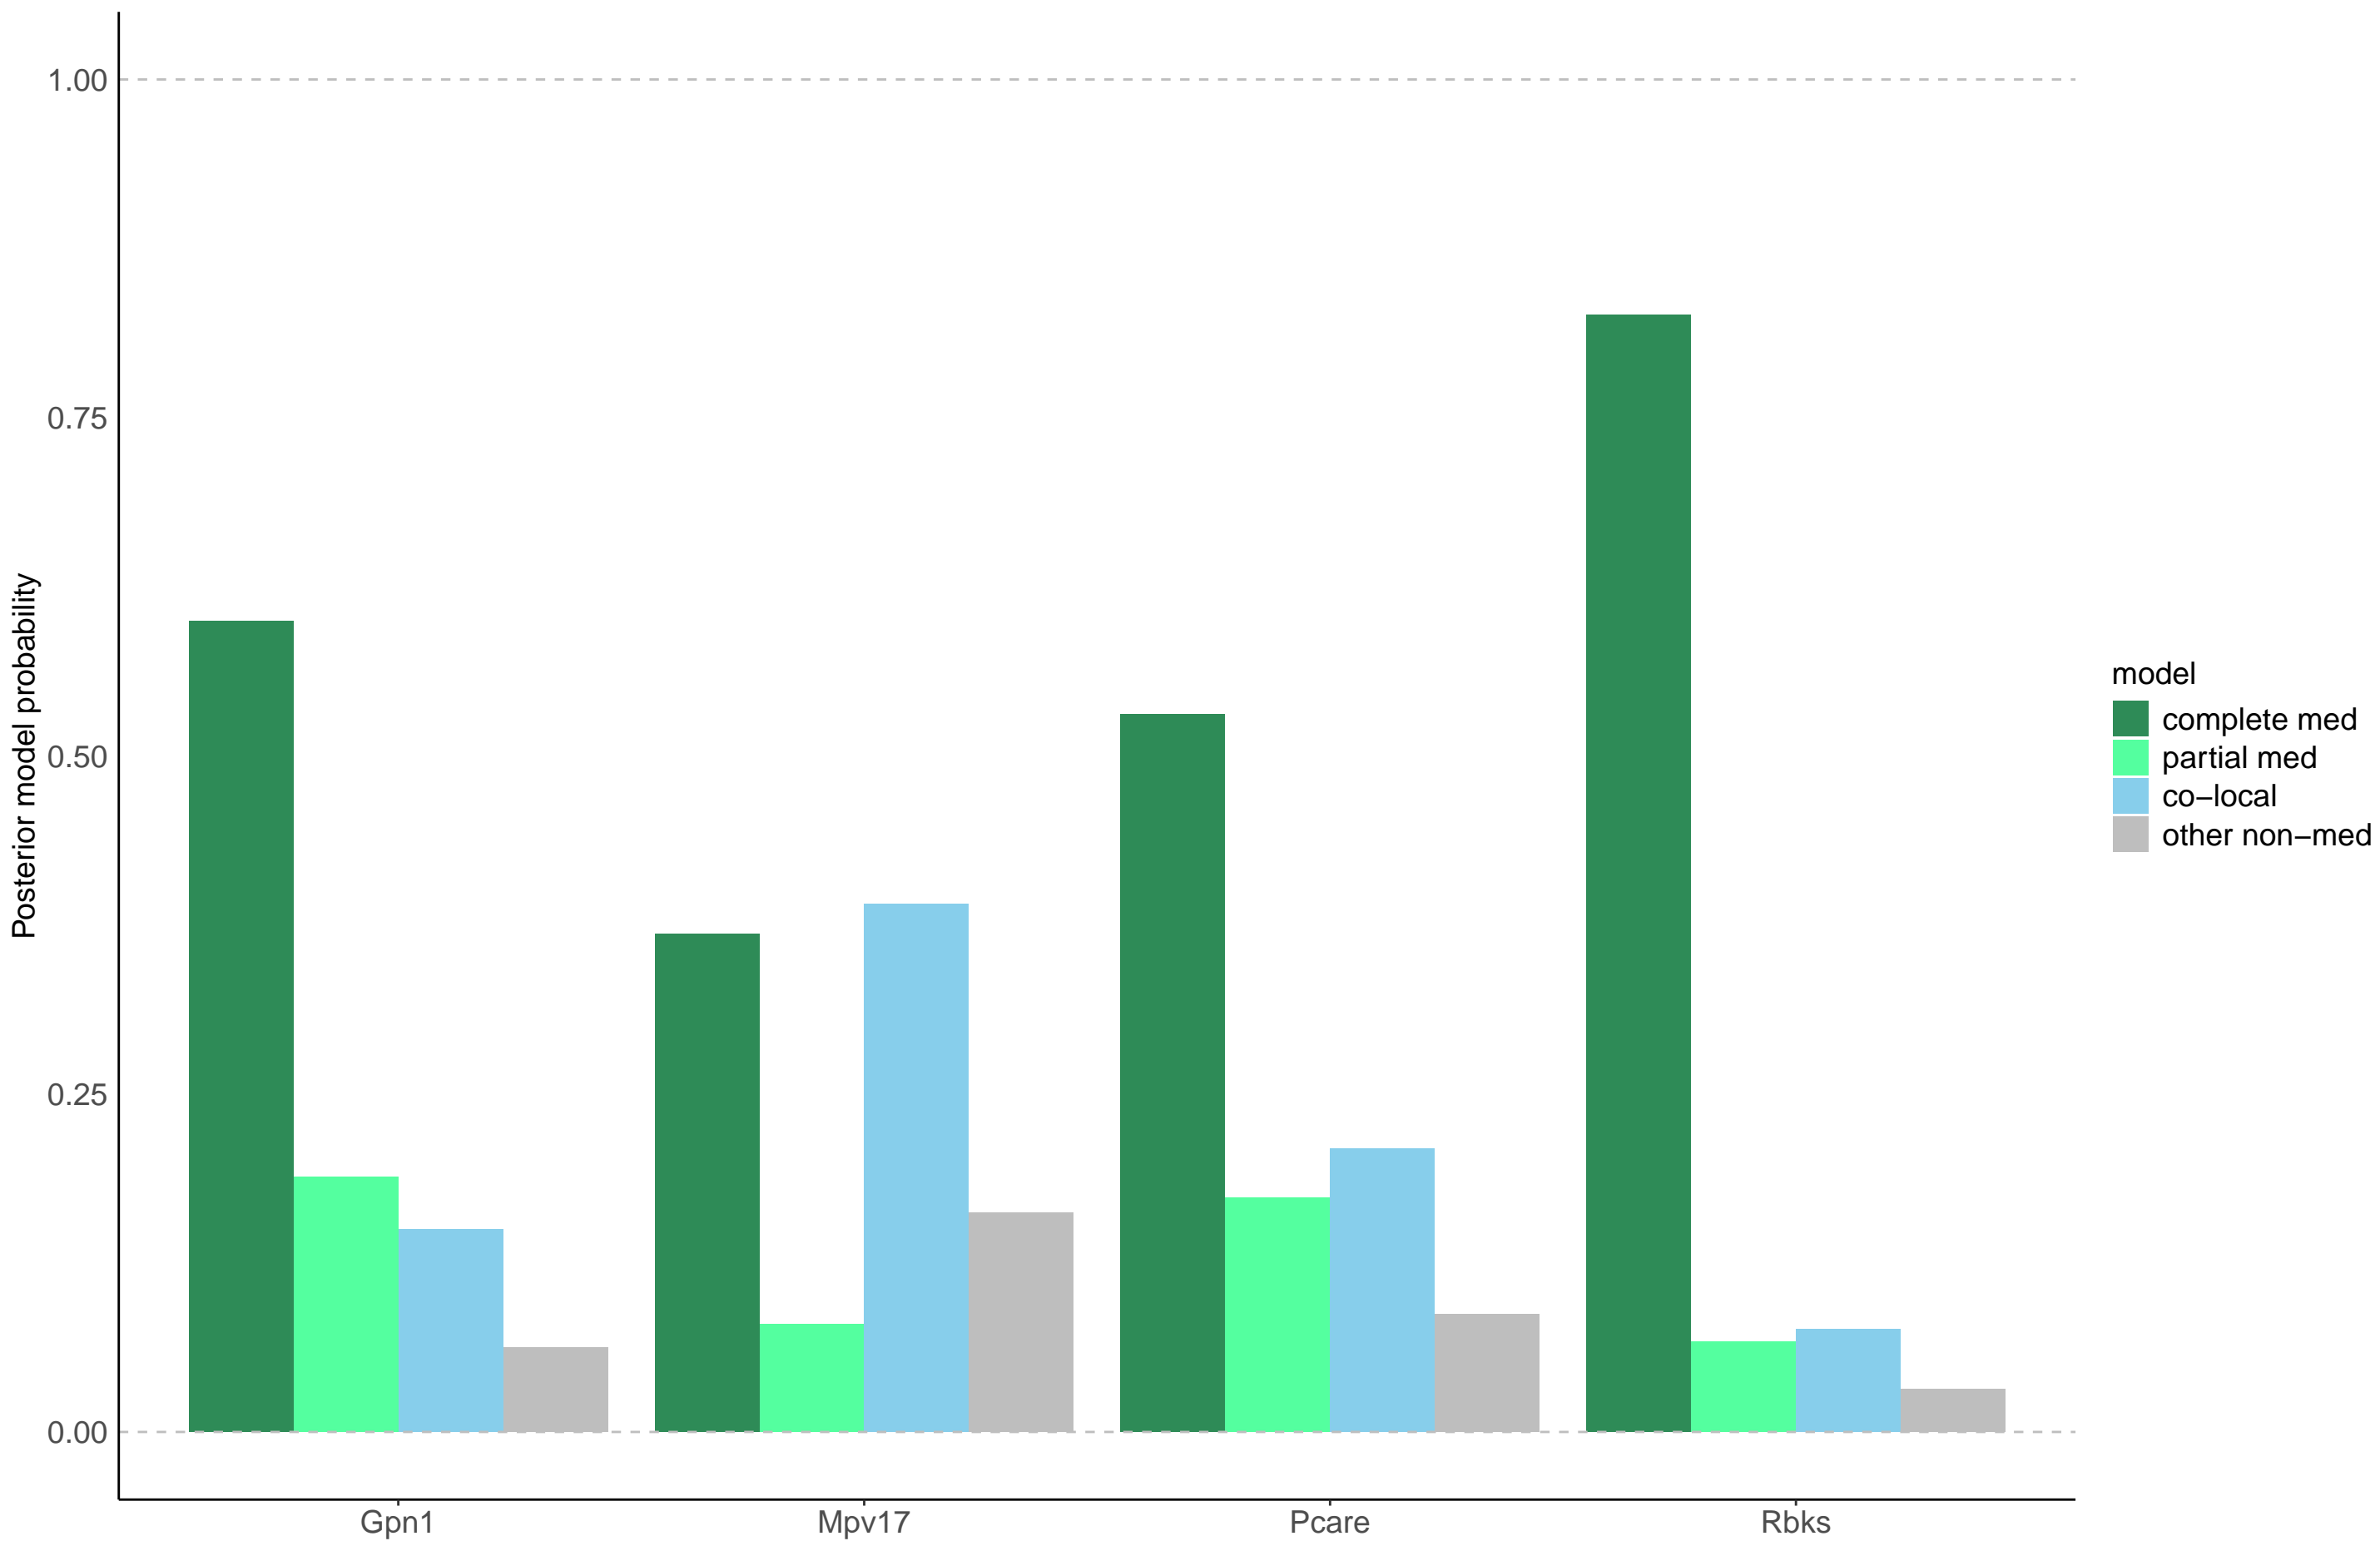

# RetroFat-chr6\_27064422

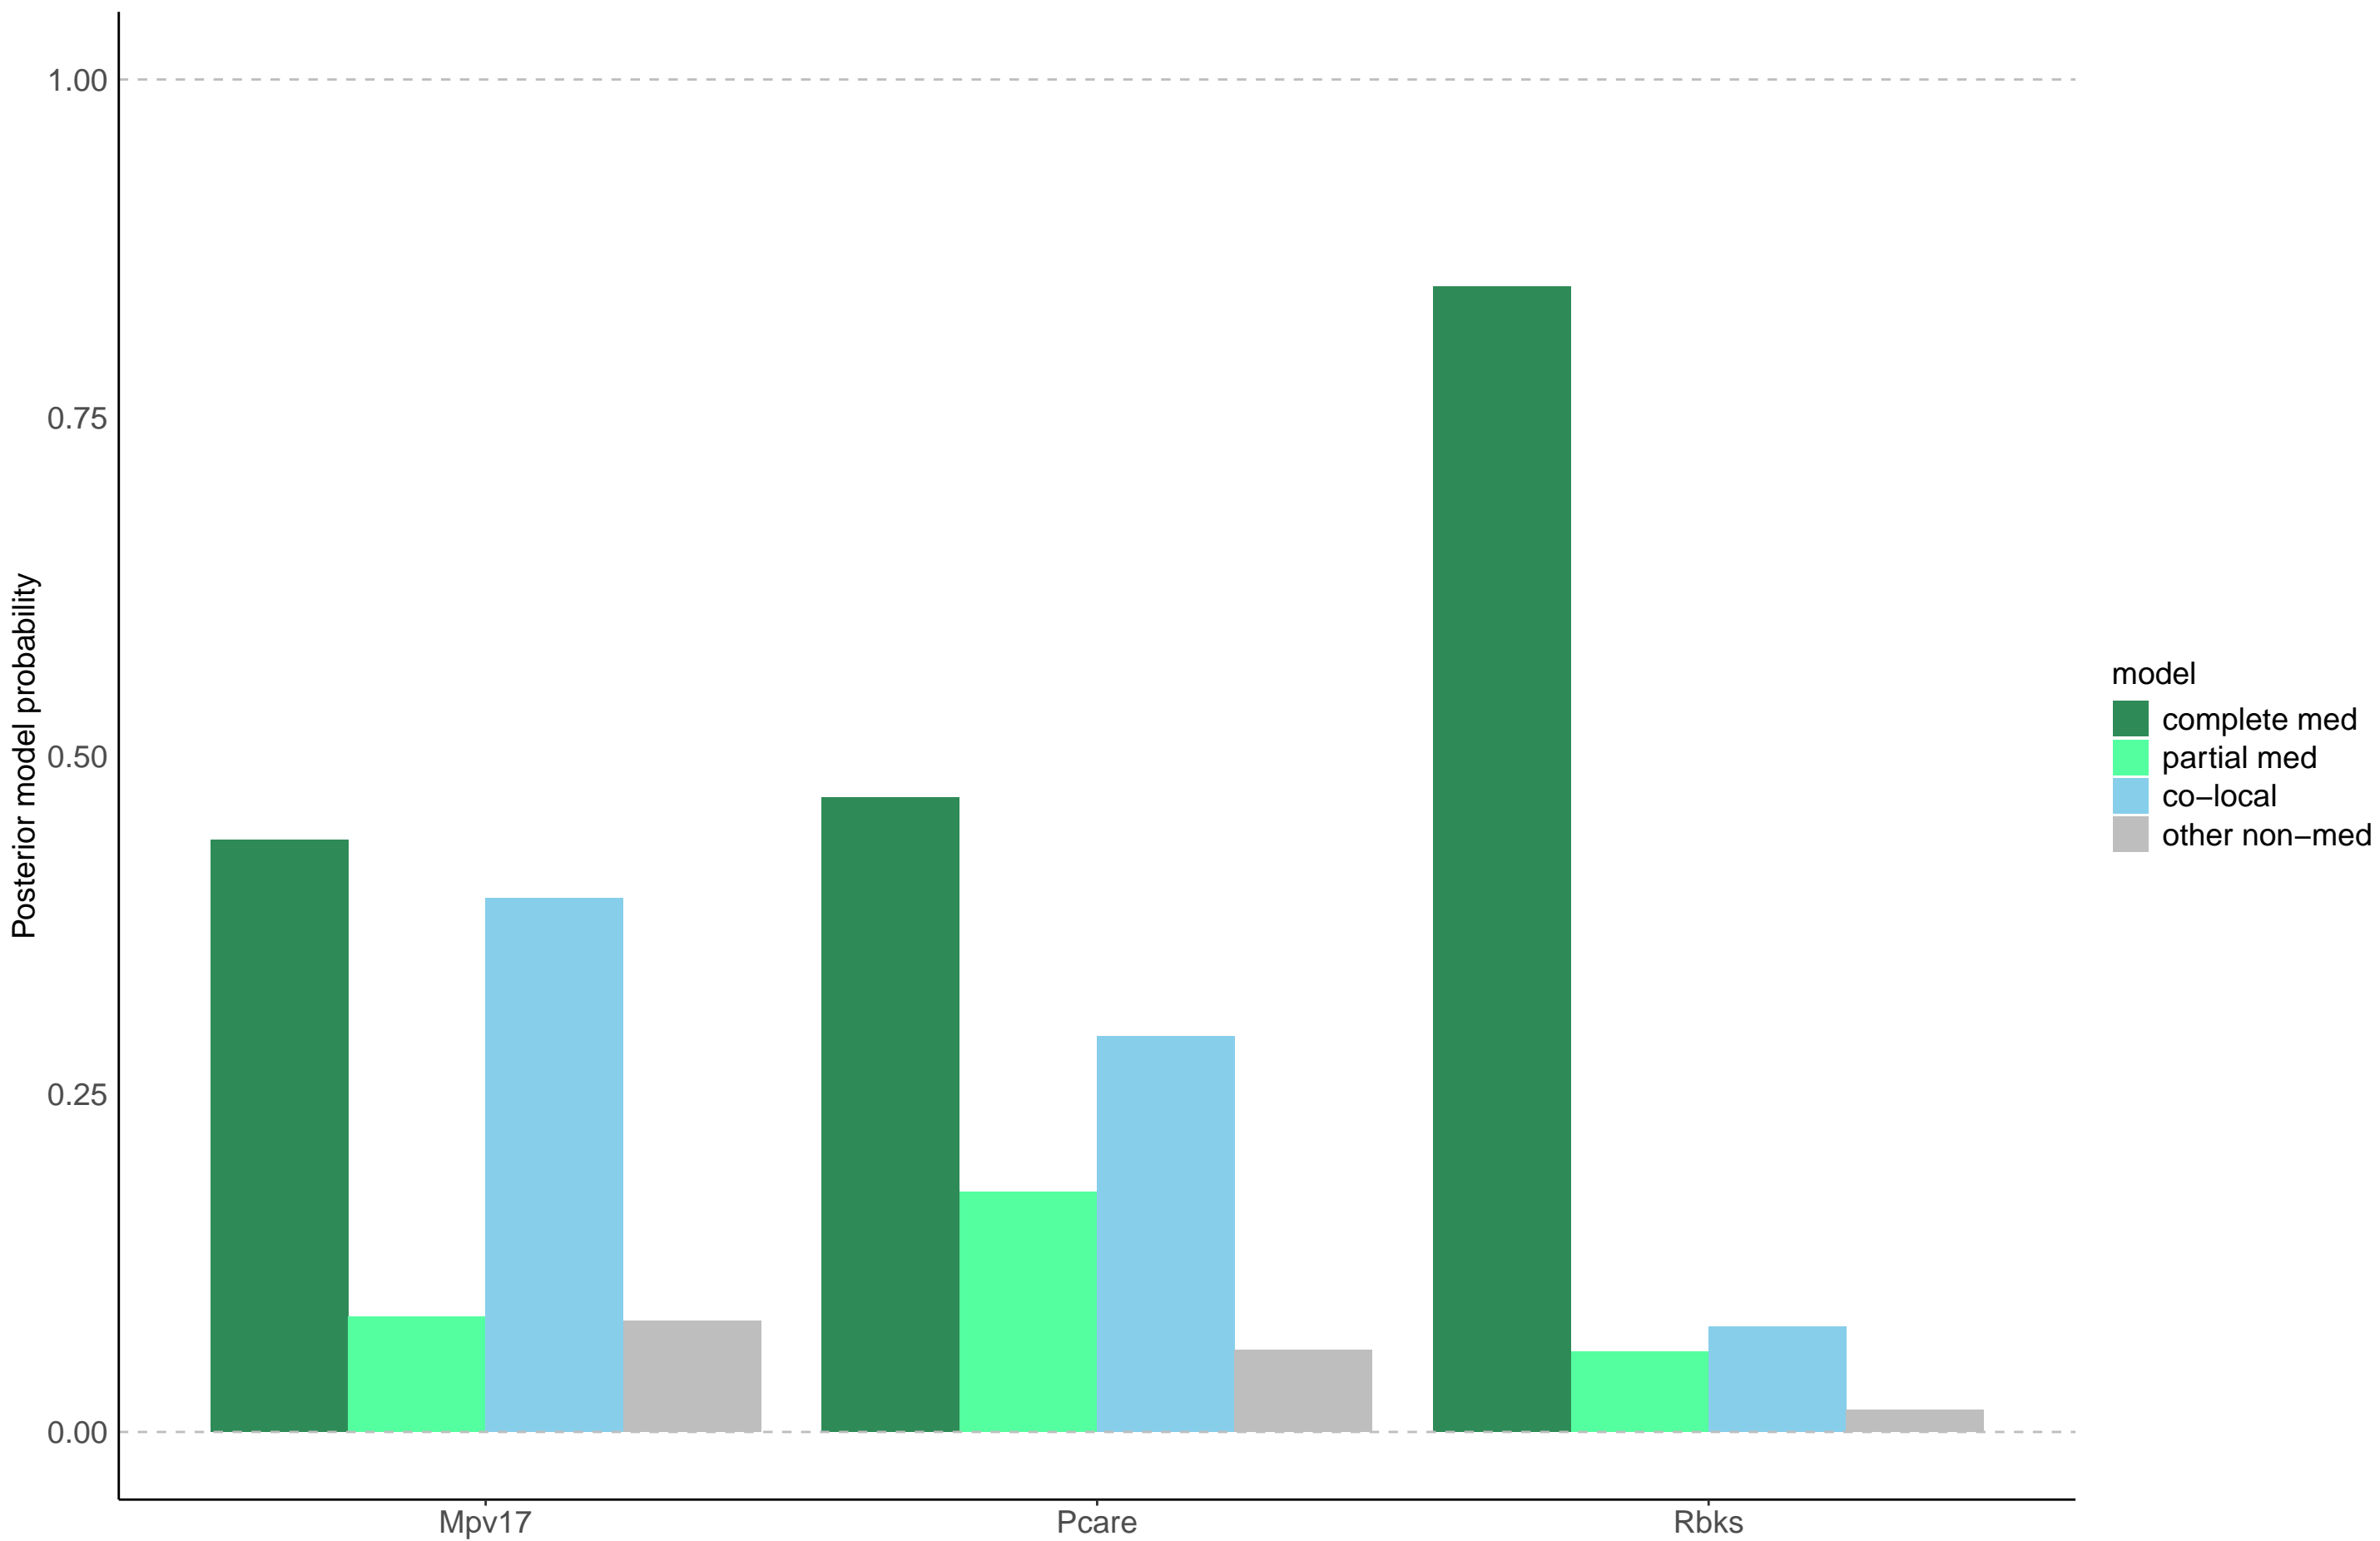

RetroFat/BW-chr6\_27064422

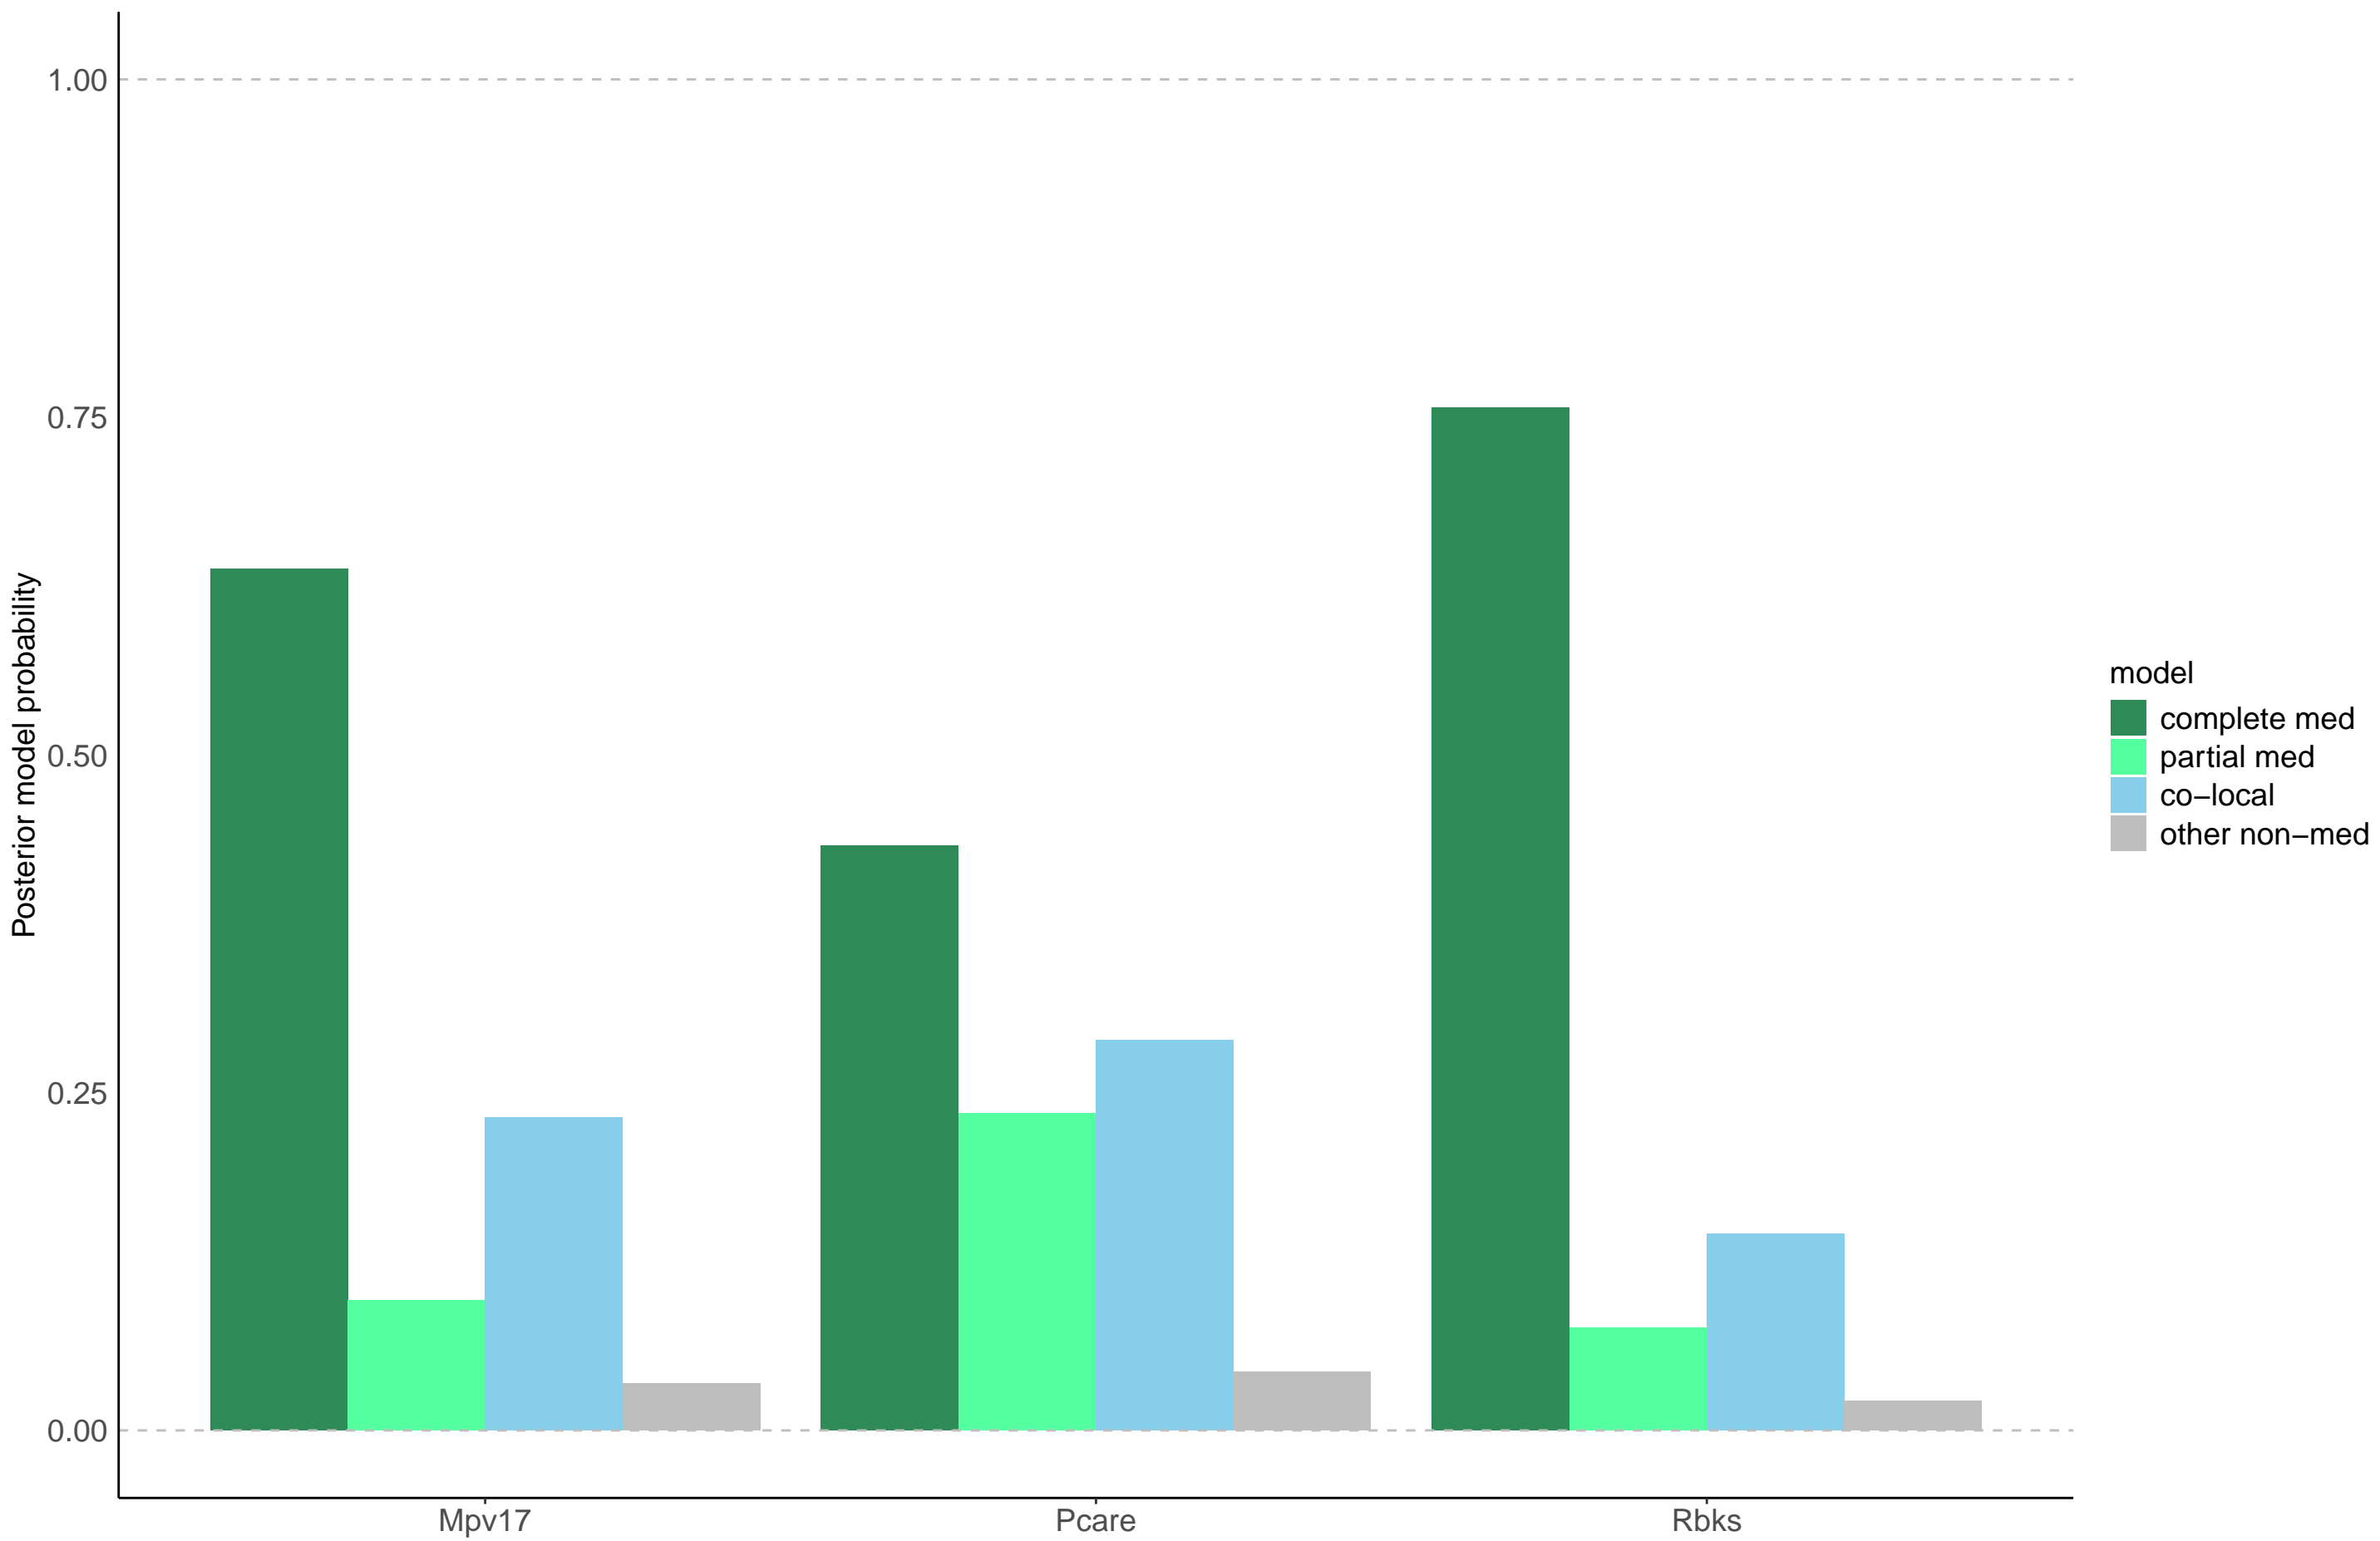

LftKid-chr7\_115463917

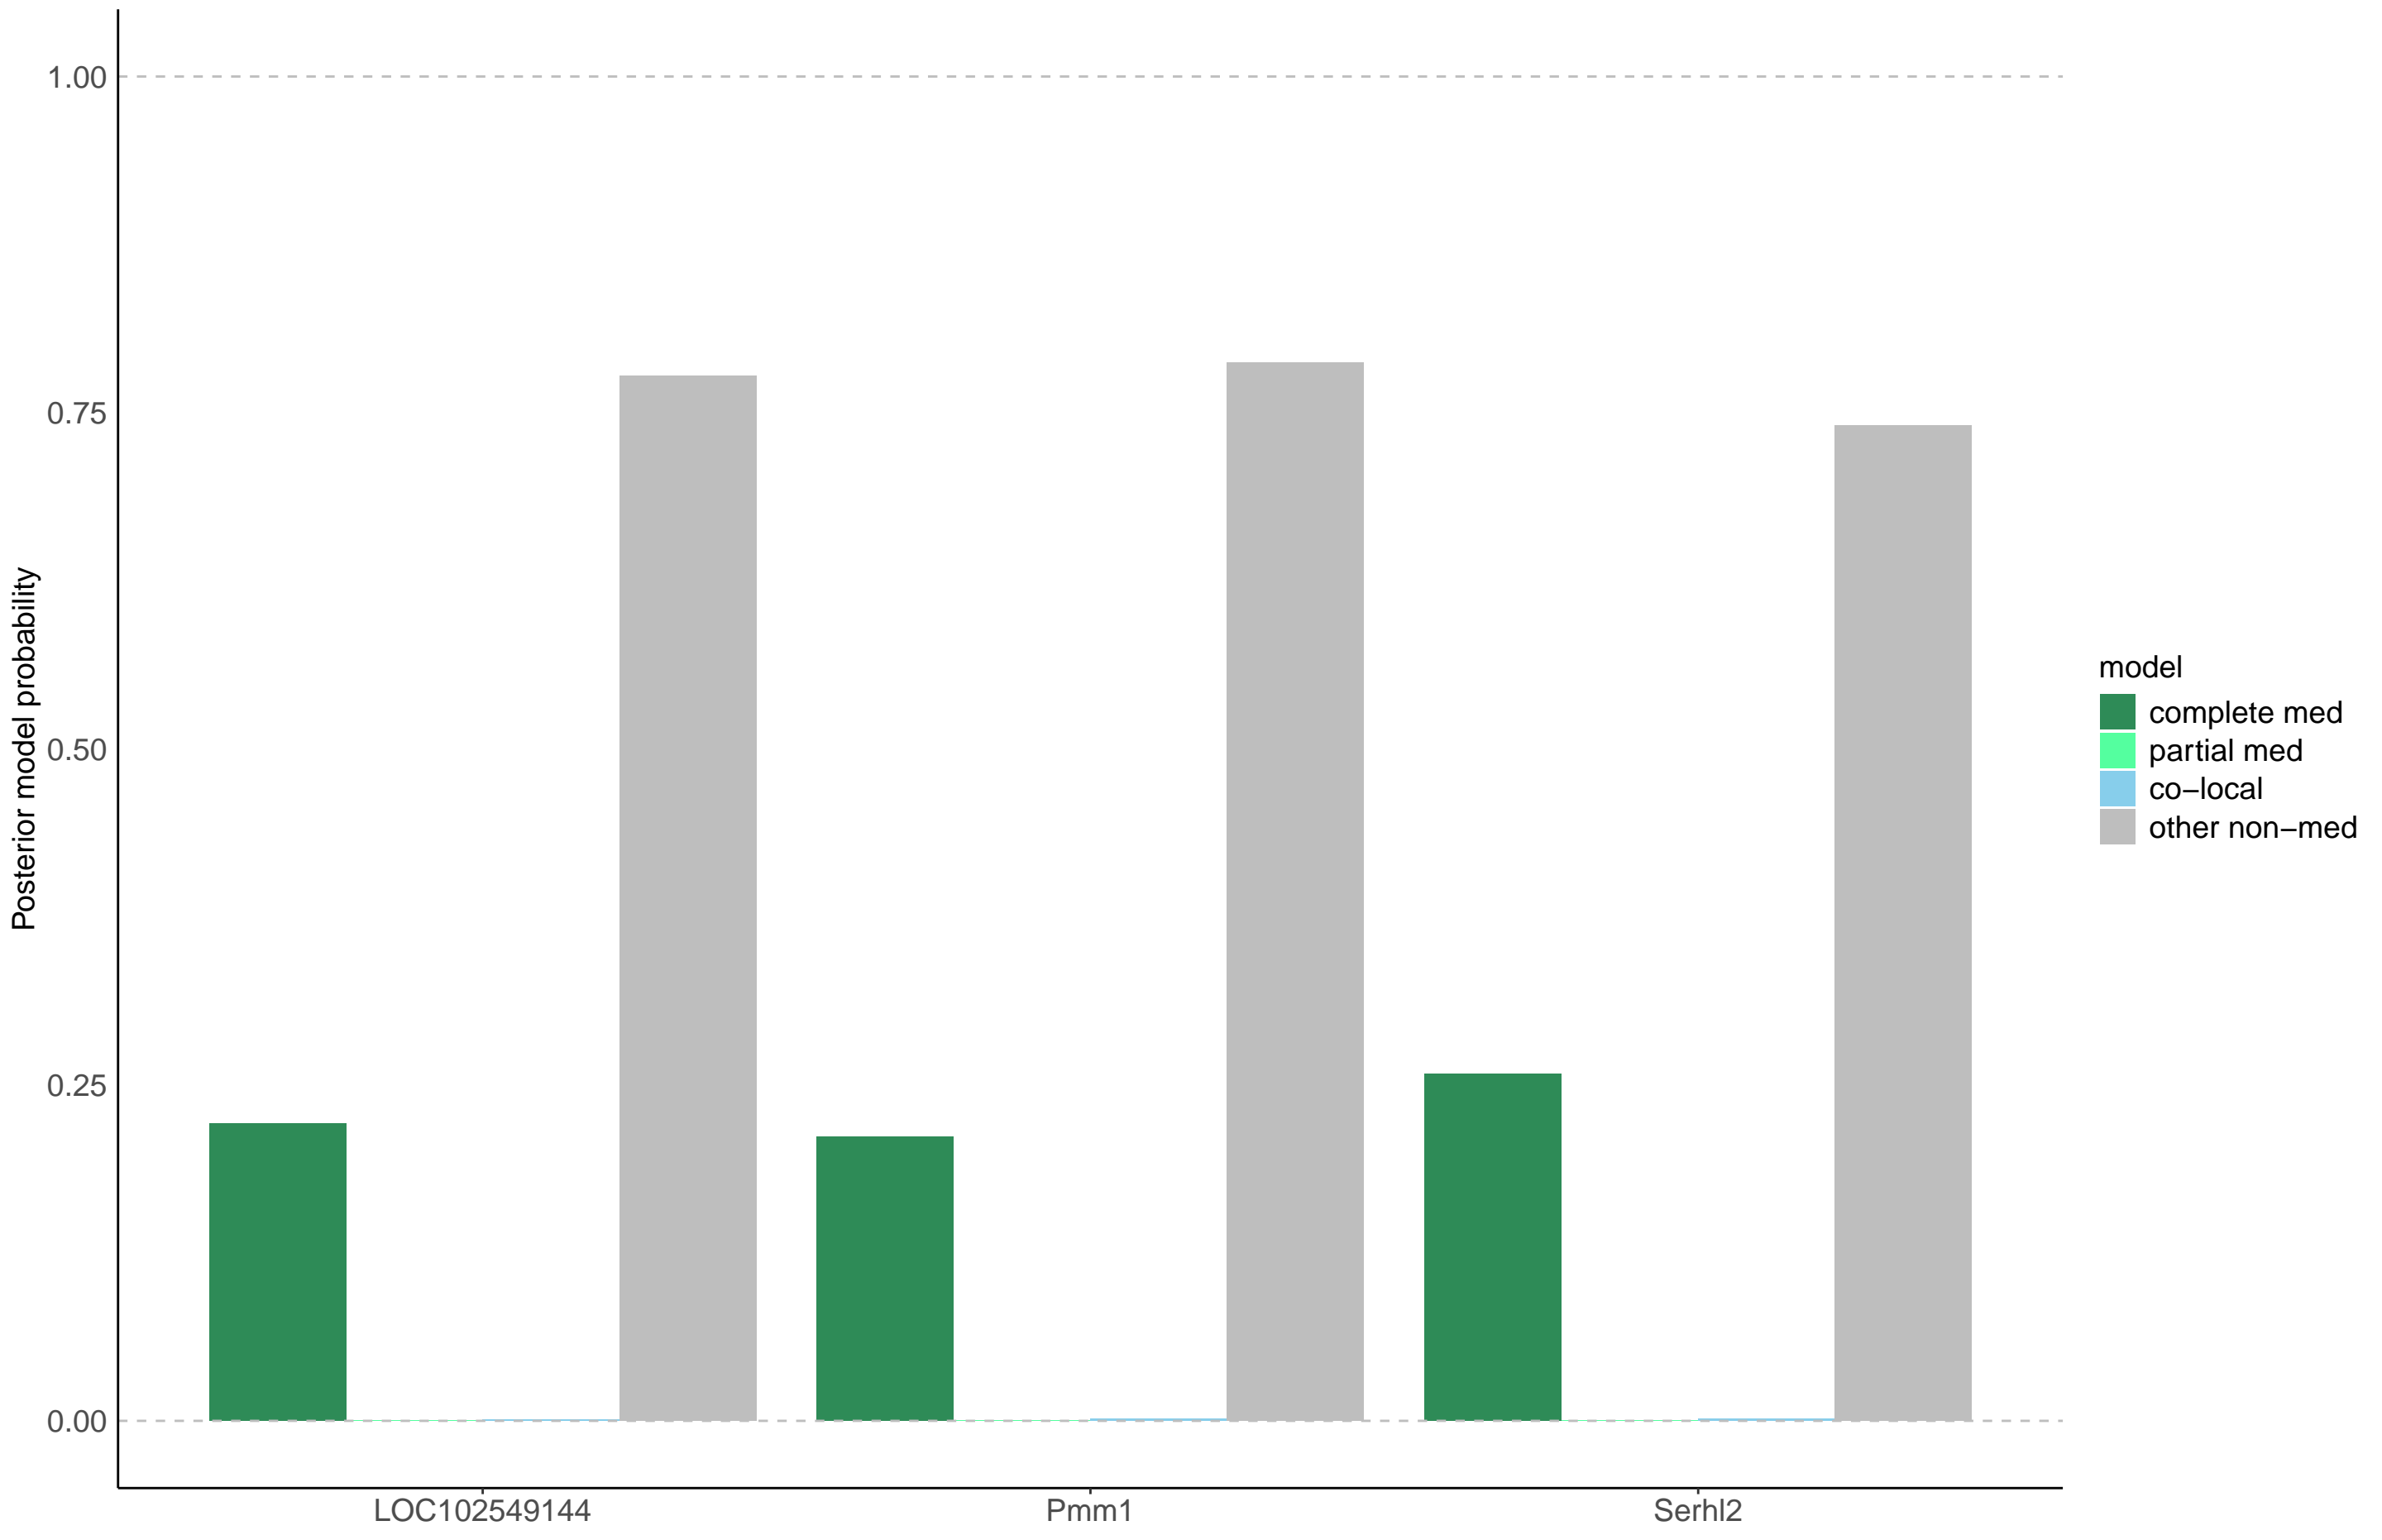

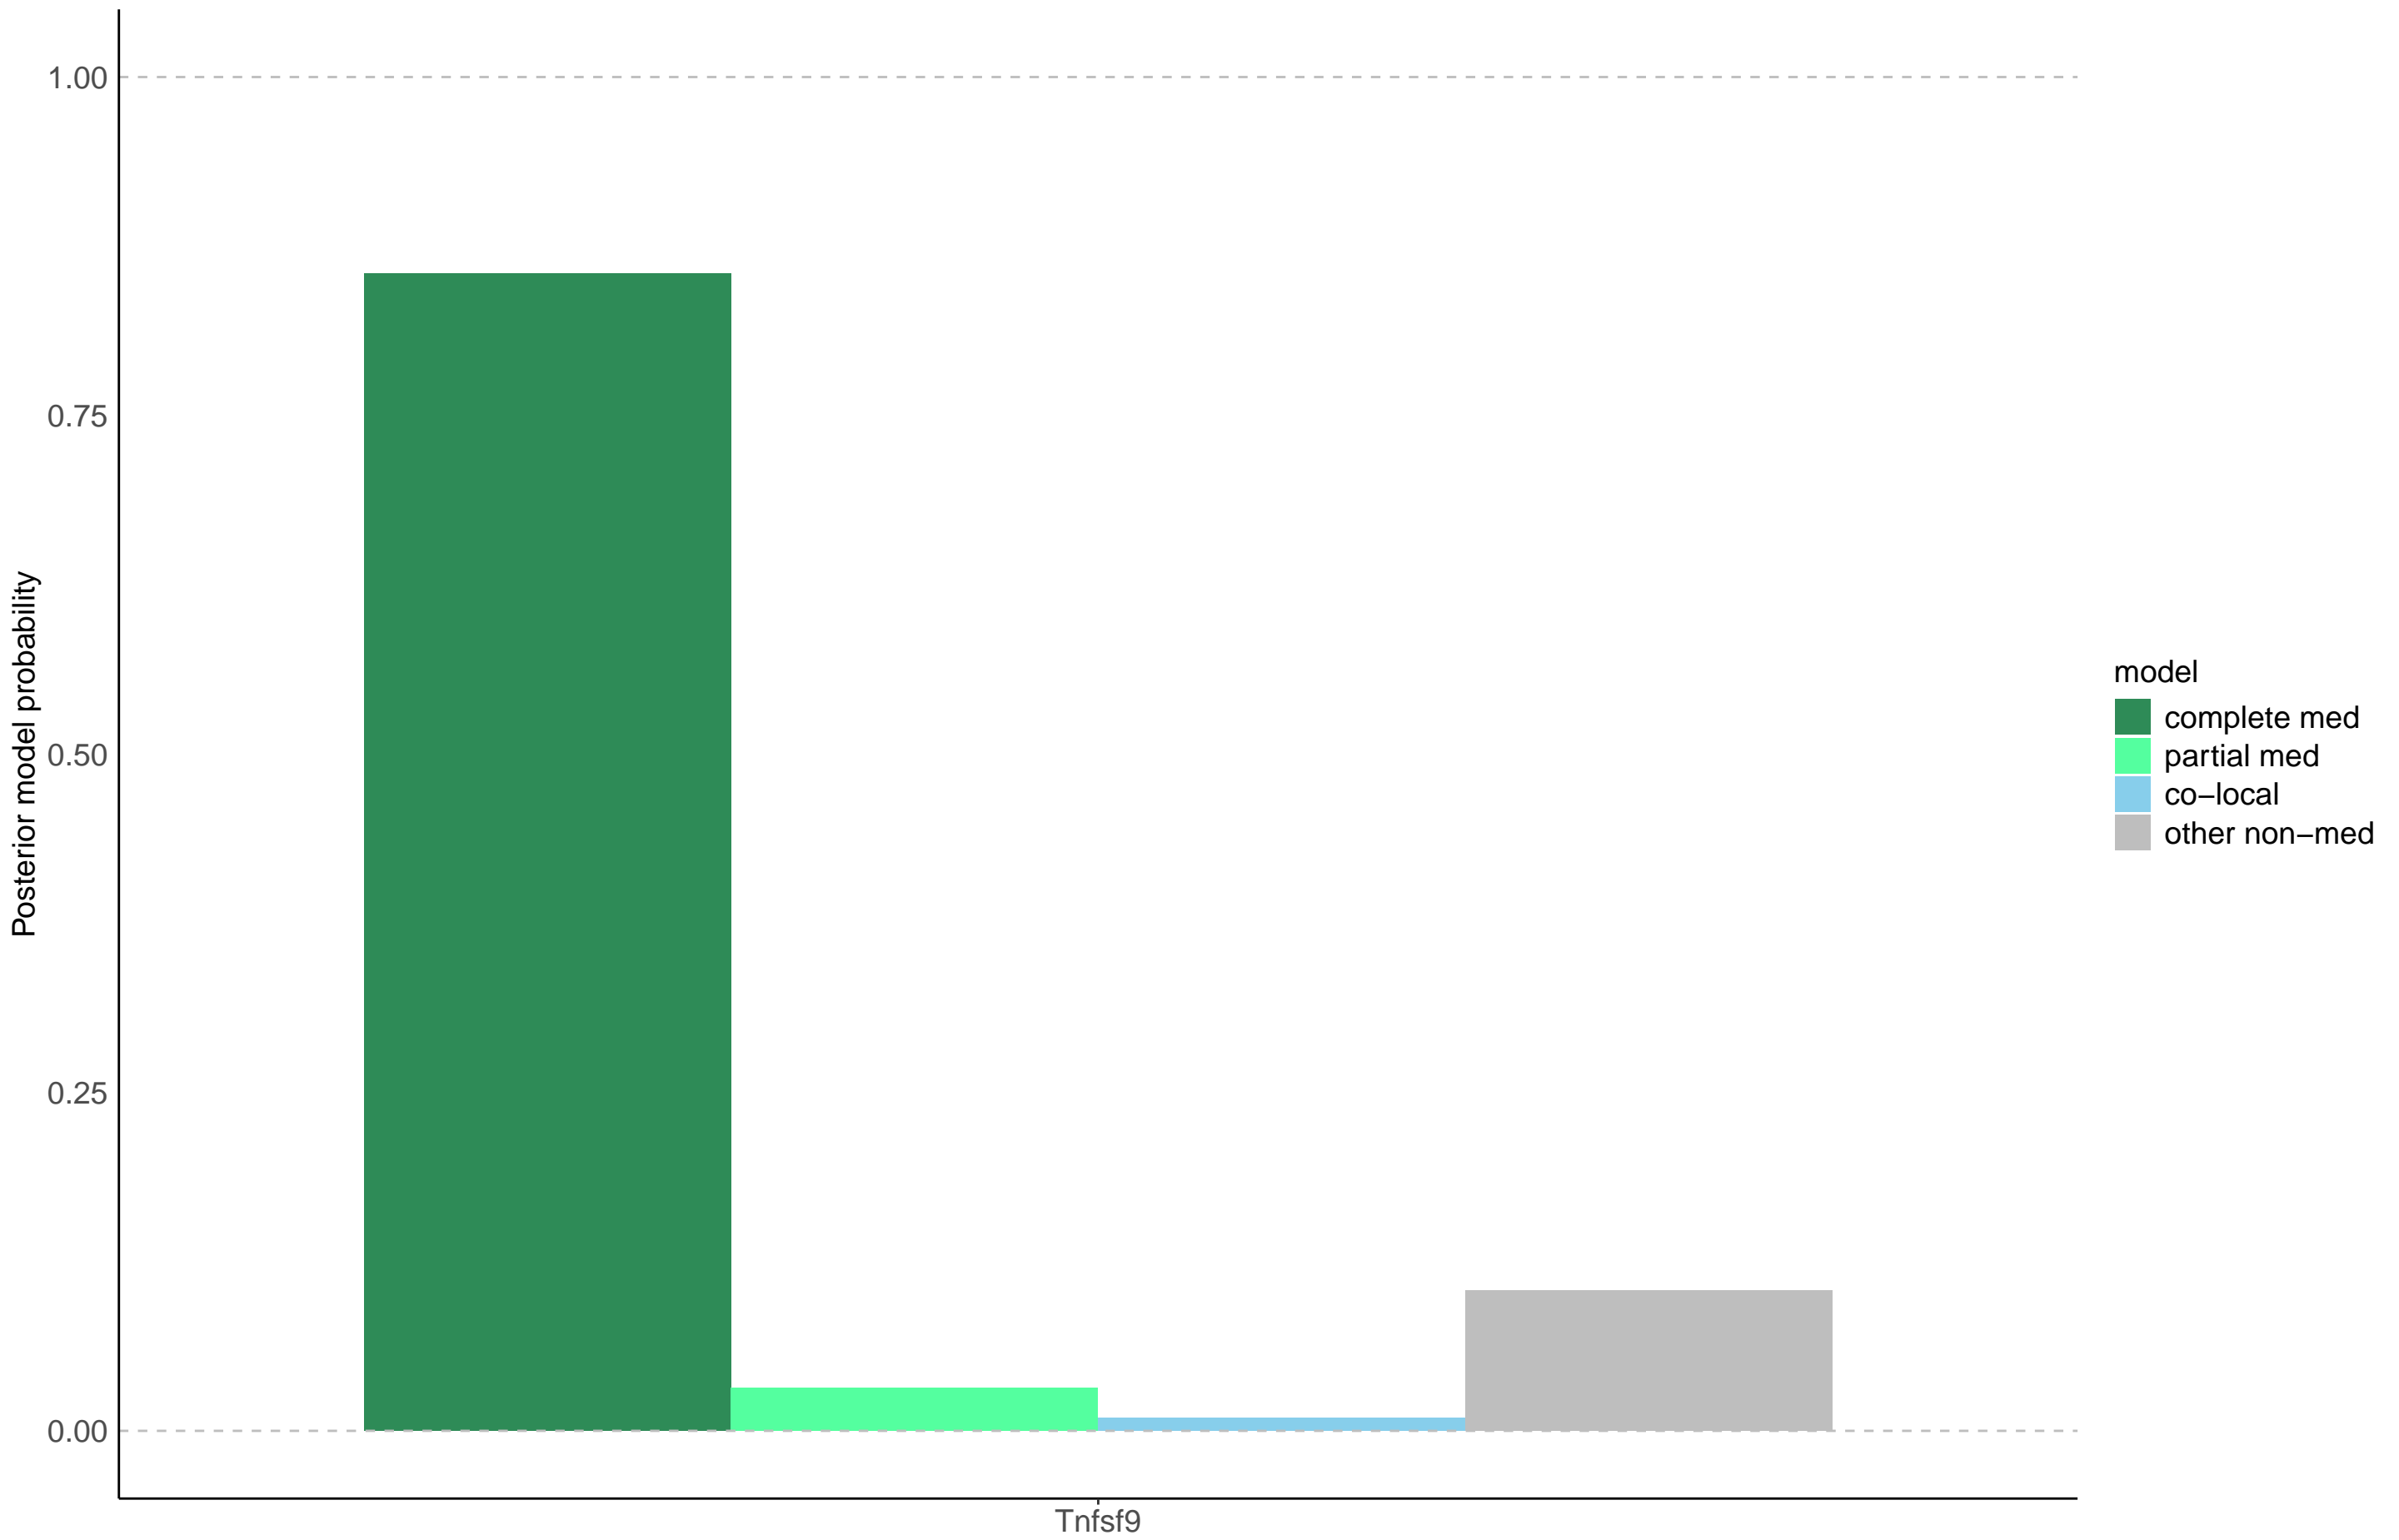

BWDelta-chr18\_26161137

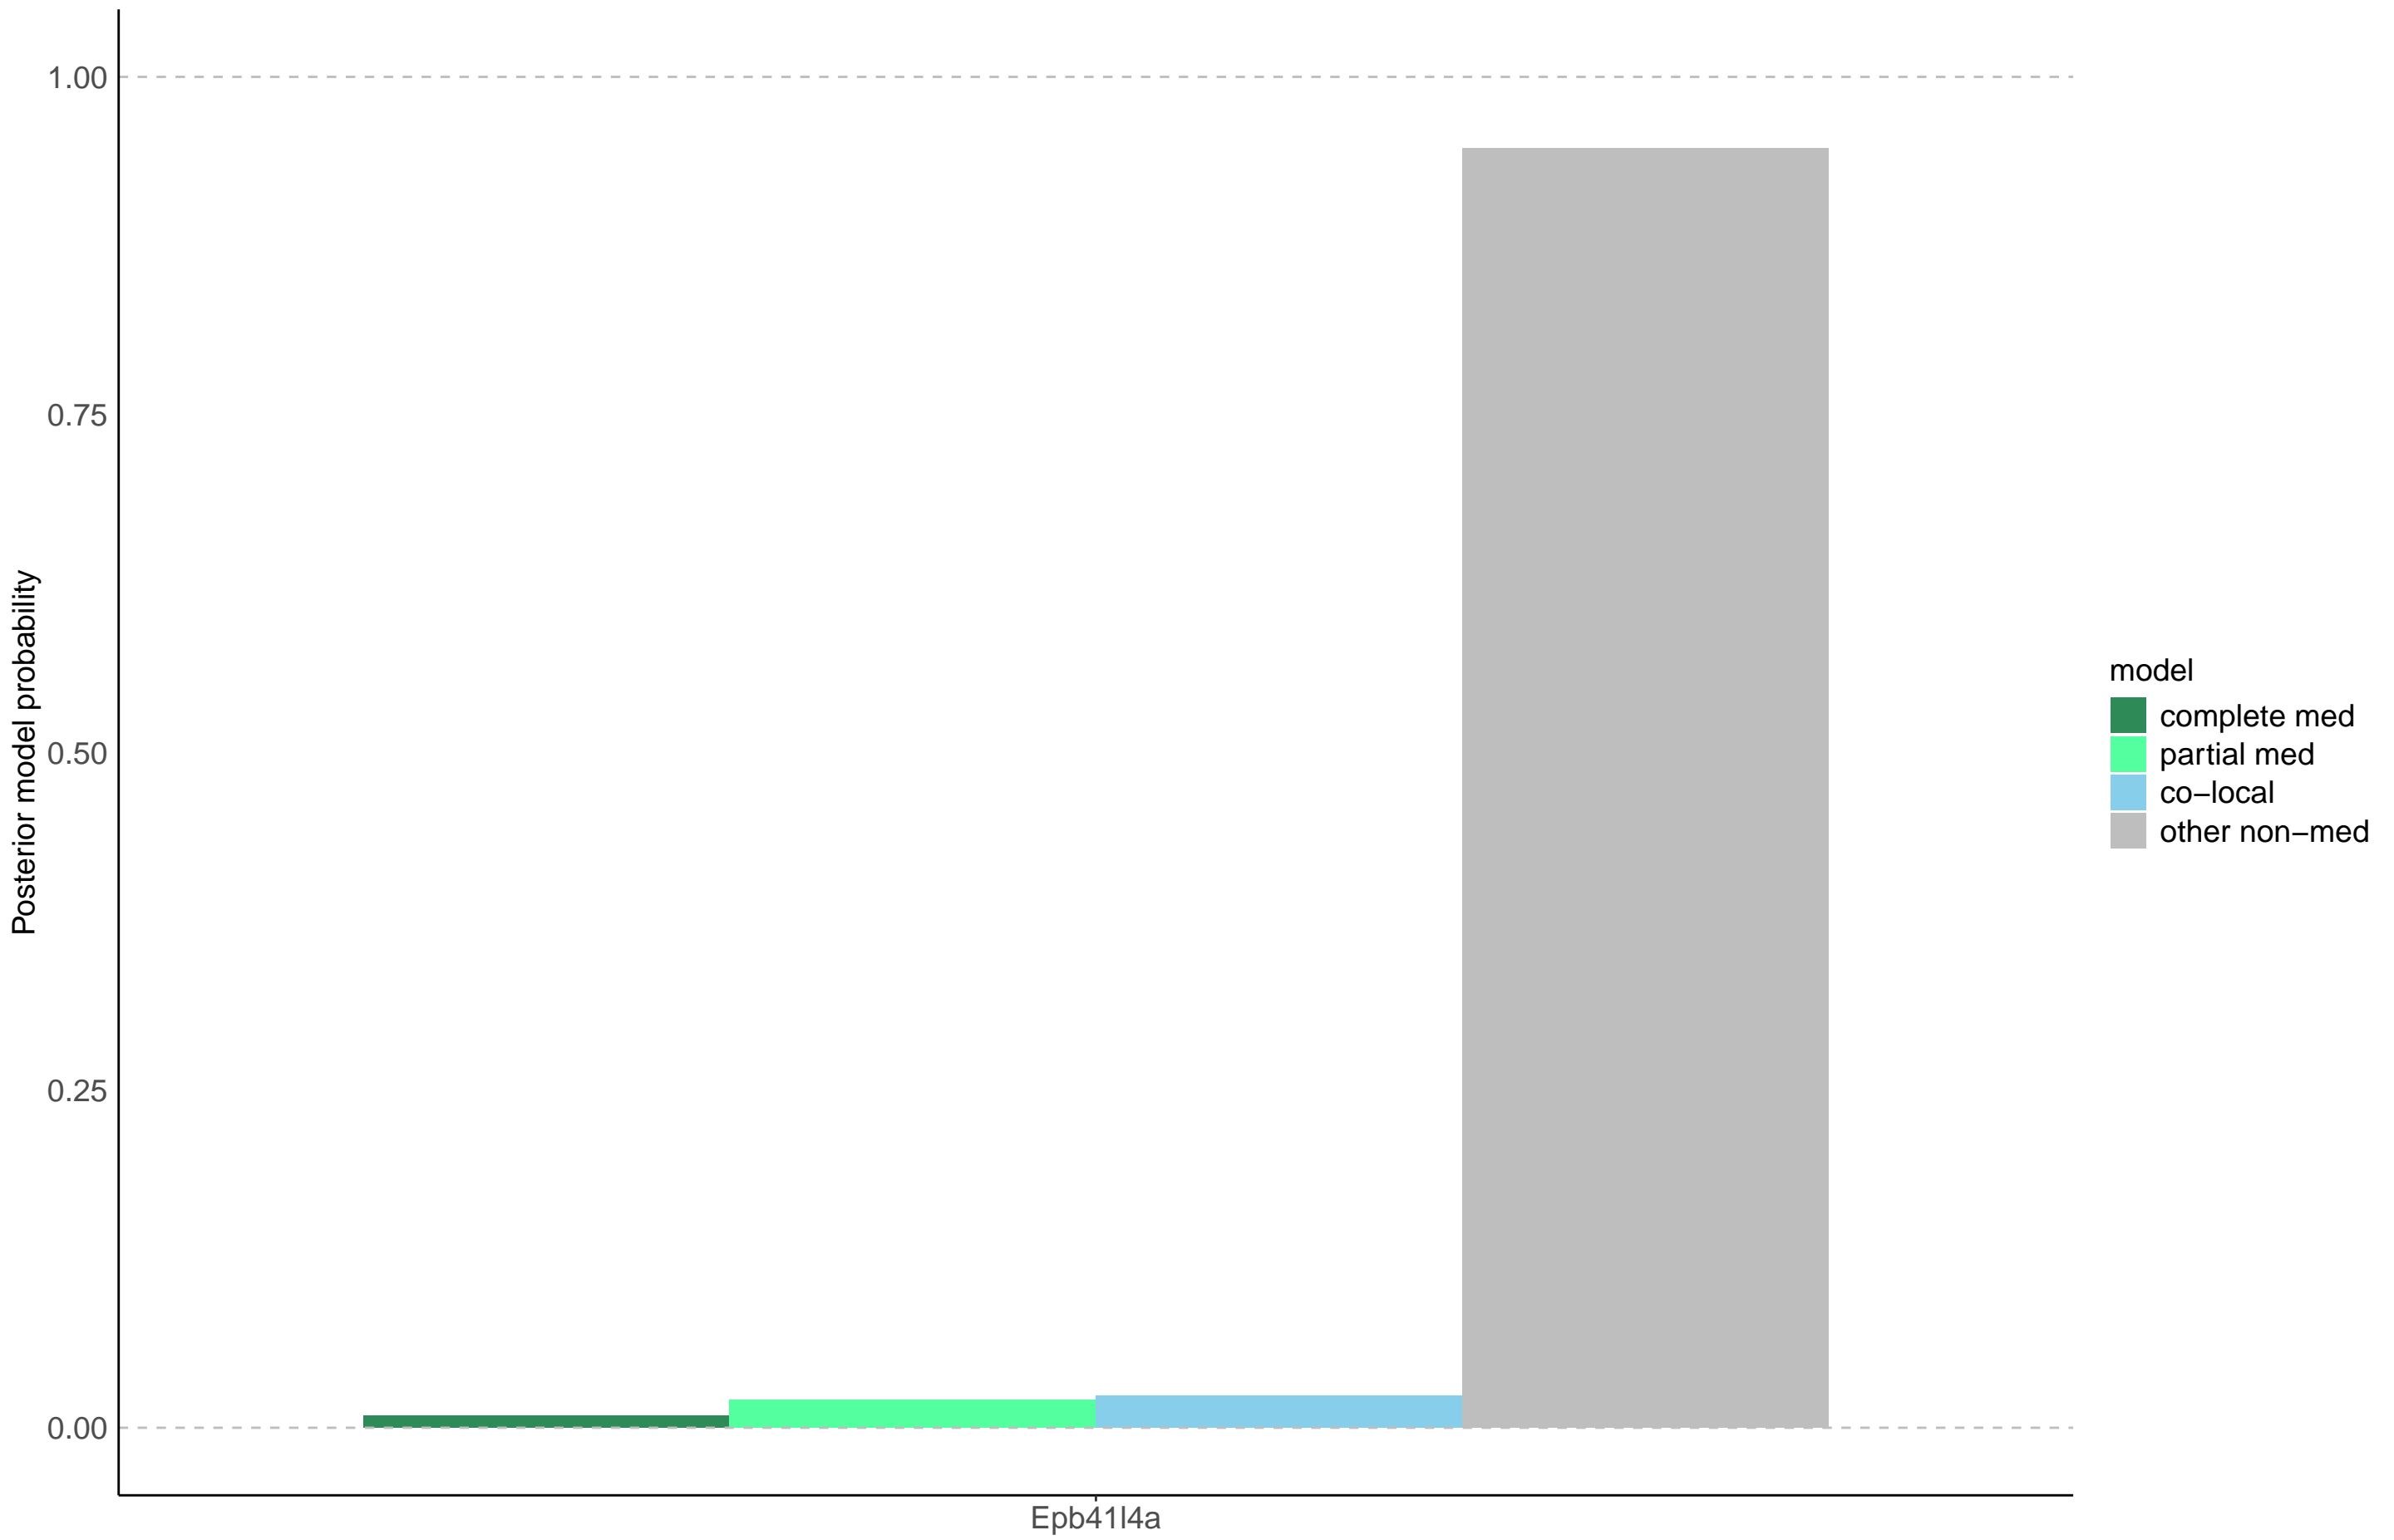

Supplement: Supplementary file 2 [file ea99237b72a8b236ba76bbcc.pdf]
