# Supplementary material for: Identification of novel candidate neural genes for diet-induced obesity in outbred heterogeneous stock rats
Source: Research Square preprint supplement (doi:10.21203/rs.3.rs-9695368/v1), 2026-05-22
Supplement: Supplementary file 1 [file 3dd5c4c0742af7e0823e55d1.xlsx]

## Sheet: Supp Table 1 phenotypes
Supplement Table 1. Summary of phenotypes, animal numbers and covariates
Name	Description	Unit	Number of rats HFD Male	Number of rats LFD Male	Number of rats HFD Female	Number of rats LFD Female	Co-variates
BW	Body weight of rat at time of euthanasia	grams (g)	483	482	485	492	Sex,Diet,Litter.Size
BWDelta	Difference in body weight at end of study (euthanaisa) versus five weeks of age (time of diet start)		483	482	485	492	Sex,Diet,Litter.Size,Age.at.Diet.Start
BWYoung	Body weight of rat at five weeks of age (right before starting on HFD or LFD)	grams (g)	483	482	485	492	Sex,Litter.Size,Age.at.Diet.Start
FatMass	Percent fat of body weight at 10 week on diet	grams (g)	481	477	480	489	Sex,Diet,Litter.Size
LeanMass	Percent lean weight of body weight at 10 week on diet	grams (g)	481	477	480	489	Sex,Diet,Experimenter,Litter.Size
FatMassYoung	Percent fat of body weight before diet	percentage (%)	449	445	448	456	Sex,Litter.Size,Experimenter,early (3 day) diet exposure
LeanMasYoung	Percent lean weight of body weight before diet	percentage (%)	449	445	448	456	NA
FatMassDelta	Difference in fat mass between end of study and time of diet start (FatMass - FatMassYoung)	grams (g)	447	442	444	453	Sex,Diet,ExperimenterYoung
LeanMassDelta	Difference in lean mass between end of study and time of diet start (LeanMass - LeanMassYoung)	grams (g)	447	441	444	453	Sex,Diet,ExperimenterYoung,Litter.Size
%FatMassDelta	Percent change in fat mass between end of study and time of diet start (%FatMass - %FatMassYoung)	percentage (%)	447	442	444	453	Sex,Diet,Age.at.Test
%LeanMassDelta	Percent change in lean mass between end of study and time of diet start (%LeanMass - %LeanMassYoung)	percentage (%)	447	441	444	453	Sex,Diet,ExperimenterYoung,ExperimenterAdult,Litter.Size,Age.at.Test
Food@7wks	Total food consumed when individually housed from 7 to 8 weeks of age regressed on body weight at that time	grams (g)	470	462	469	476	Sex,Diet,Litter.Size,Age.at.Diet.Start,BW.week7
Food@11wks	Total food consumed when individually housed from 11 to 12 weeks of age regressed on body weight at that time	grams (g)	460	457	457	469	Sex,Diet,Age.at.Diet.Start,BW.week11
Gluc0	Fasting blood glucose after a 17 hour fast (prior to IPGTT	mg/dl	476	479	481	484	Sex,Diet,Number,Handler
Insulin0	Fasting insulin after a 17 hour fast (prior to IPGTT)	ng/ml	455	460	397	381	Sex,Diet,Injector,Handler
GluAUC	Glucose Area Under the Curve during intraperitoneal glucose tolerance test (from 0 and 120 minute time point)s	counts	474	474	476	481	Sex,Diet,Injector,Handler
Activity_Light	Total motion counts during the period when lights are on in the rat room over the duration of the test regressed on body weight	counts	253	249	240	239	Sex,TelemeterNr,BW.week11
Activity_Dark	Total motion counts during the period when lights are off in the rat room over the duration of the test regressed on body weight	counts	253	249	240	238	Sex,BW.week11
Activity_Paired	Average motion counts during the X hours when the rats were pair housed regressed on body weight	counts	253	249	240	239	Sex,BW.week11
Activity_Single	Average motion counts during the X hours when the rats were individually housed regressed on body weight	counts	253	249	240	238	Sex,TelemeterNr,BW.week11
Activity_Diff	The difference in motion counts in 24 hour average for pair-housed versus single-housed rats regressed on body weight	counts	253	249	240	238	Sex,TelemeterNr,BW.week11
Activity_Total	Total motion counts over the 168 hour time period of the test regressed on body weight	counts	253	249	240	238	Sex,BW.week11
CHOL	Serum cholesterol levels measured at the time of euthanasia	mg/dl	409	406	379	357	Sex,Diet
TRIG	Serum triglyceride levels measured at the time of euthanasia	mg/dl	409	402	378	354	Sex,Diet,Litter.Size
AST	Serum aspartate aminotransferase measured at the time of euthanasia	U/l	409	406	378	357	NA
ALT	Serum alanine aminotransferase measured at the time of euthanasia	U/l	409	406	378	357	Sex,Diet
BUN/Cre	Serum blood urea nitrogen/creatine ratio measured at the time of euthanasia	mg/dl	401	395	374	349
FattyLiver	Kidneys were scored visually based on the following scale: 0 = healthy red coloration, smooth uniform texture 1 = notable yellowing present over 30-75% of the surface area of the liver 2 = liver is uniformly yellowed in coloration 3 = uniform, lighter yellow coloration, visible mild to moderate fibrosis	score	457	461	464	465	Sex,Diet,Primary,Secondary
RetroFat	Weight of both the left and right retroperitoneal fat pads	grams (g)	483	482	485	492	Sex,Diet,Litter.Size,Primary
GonadalFat	Weight of bothe the left and right epididemal (male) or perimetrial (female) fat pads	grams (g)	462	463	468	470	Sex,Diet,Litter.Size,Primary,Secondary
OmenFat	Weight of the omental and mesoenteric fat pads	grams (g)	436	427	426	435	Sex,Diet,Litter.Size,Primary
Brain	Weight of the brain	grams (g)	483	483	484	490	Sex
Liver	Weight of the liver	grams (g)	463	464	466	469	Sex,Litter.Size,Secondary
LftKid	Weight of the anatomical left kidney	grams (g)	453	458	454	461	Sex,Diet,Litter.Size,Secondary
RigKid	Weight of the anatomical right kidney	grams (g)	463	461	466	468	Sex,Diet,Litter.Size,Secondary
Kidney	Weight of both right and left kidney	grams (g)	453	455	452	459	Sex,Diet,Litter.Size,Secondary
Heart	Weight of the heart	grams (g)	439	435	436	439	Sex,Litter.Size
Pancreas	Weight of the pancreas	grams (g)	436	431	431	437	Sex,Diet,Primary,Secondary
RetroFat/BW	Weight of both the left and right retroperitoneal fat pads divided by body weight at euthanasia	fraction (g/g)	463	464	468	470	Sex,Diet,Litter.Size,Primary,Secondary
GonadalFat/BW	Weight of both the left and right epididemal (male) or perimetrial (female) fat pads divided by body weight at euthanasia	fraction (g/g)	462	463	468	470	Diet,Litter.Size,Primary,Secondary
OmenFat/BW	Weight of the omental and mesoenteric fat pads divided by body weight at euthanaisa	fraction (g/g)	436	427	426	435	Sex,Diet,Litter.Size,Primary
Brain/BW	Weight of the brain divided by body weight at euthanasia	fraction (g/g)	483	483	484	490	Sex,Diet
Liver/BW	Weight of the liver divided by body weight at euthanasia	fraction (g/g)	463	465	466	469	NA
LftKid/BW	Weight of the anatomical left kidney divided by body weight at euthanasia	fraction (g/g)	453	459	454	461	Sex,Diet,Secondary
RigKid/BW	Weight of the anatomical right kidney divided by body weight at euthanasia	fraction (g/g)	483	480	482	490	NA
Heart/BW	Weight of the heart divided by body weight at euthanasia	fraction (g/g)	439	436	436	439	Sex,Diet
Panc/BW	Weight of the pancreas divided by body weight at euthanasia	fraction (g/g)	436	431	431	437	Sex,Diet,Primary,Secondary
							Primary harvests all target tissues of interest within the central body cavity and sets them aside.
							Secondary extracts brain and pituitary gland from the detached skull, weighs and freezes all tissues, and process small and large intestine for collection (flushing with PBS)

## Sheet: Supp Table 2 raw phenotype data
Supplement Table 2. Raw phenotype data
Transponder.ID	Animal.ID	Dame.ID	Sire.ID	Sex	Diet	Date.Of.Birth	Litter.Number	Litter.Size	Activity_Total	Activity_Light	Activity_Dark	Activity_Paired	Activity_Single	Activity_Diff	FatMass	LeanMass	FatMassYoung	LeanMassYoung	FatMassDelta	LeanMassDelta	%FatMassDelta	%LeanMassDelta	Food@7wks	Food@11wks	Insulin0	Gluc0	GluAUC	CHOL	TRIG	AST	ALT	BUN/Cre	Brain	Liver	RetroFat	GonadalFat	OmenFat	LftKid	RigKid	Kidney	Heart	Pancreas	FattyLiver	BWYoung	BW	BWDelta	%BWDelta
79806_1	YK1236	79111_2	79074_1	M	HIGH FAT	2022-03-29	3	11	37975	13345	24630	5738.5	4274	1464.5	0.0783608	0.85859	0.0430769	0.875584	0.0352839	-0.0169943	465.939	205.073	68	66	1.6	101	15487.5	103	85	66	68	200	2	10.2	7.2	6.2	3	1.3	1.2	2.5	1.3	1.4	0	138	397	259	187.681
80851_4	YK1577	80249_2	80198_1	F	LOW FAT	2022-10-17	1	11	NA	NA	NA	NA	NA	NA	0.0563522	0.853412	0.0616846	0.842473	-0.00533239	0.0109388	108.251	130.917	78	78	0.166667	79	16065	72	46	78	38	0	1.8	5.4	1.6	1.8	1.1	0.9	0.9	1.8	1.3	0.9	1	105	217	112	106.667
933000320500179	YK806	77371_2	77661_1	F	HIGH FAT	2021-07-05	7	8	NA	NA	NA	NA	NA	NA	0.170742	0.763121	0.0614815	0.877609	0.109261	-0.114488	517.141	93.2323	60	50	1.8	94	16830	60	65	52	47	0	1.9	7.7	3.4	8	5.5	0.8	0.9	1.7	0.8	1.3	0	109	221	112	102.752
BB1DCD70F8	YK1910	80165_2	80266_1	M	HIGH FAT	2023-04-30	7	6	28971	9531	19440	4552	3434.33	1117.67	0.151101	0.781146	0.0624368	0.840897	0.0886643	-0.0597502	637.703	183.168	86	70	0.5	118	17422.5	62	93	52	32	0	2.2	12.3	12.5	10.6	NA	1.3	1.4	2.7	NA	NA	NA	174	463	289	166.092
BB1DCD70FA	YK1922	80923_2	80946_1	M	HIGH FAT	2023-05-09	3	8	NA	NA	NA	NA	NA	NA	NA	NA	0.0916822	0.815016	NA	NA	NA	NA	NA	NA	NA	NA	NA	NA	NA	NA	NA	NA	NA	NA	NA	NA	NA	NA	NA	NA	NA	NA	NA	128	NA	NA	NA
BB1DCD70FB	YK1930	80854_2	81157_1	M	HIGH FAT	2023-05-10	3	10	NA	NA	NA	NA	NA	NA	0.122672	0.806604	0.0555046	0.840122	0.0671674	-0.0335182	656.309	228.549	84	64	1.7	106	15787.5	81	109	62	66	0	2.1	8.8	9.7	8.6	NA	1.2	1.2	2.4	NA	NA	NA	131	378	247	188.55
BB1DCD70FC	YK1944	80668_2	80163_1	M	LOW FAT	2023-05-18	5	9	NA	NA	NA	NA	NA	NA	0.0543165	0.856414	0.0478022	0.82956	0.00651428	0.0268534	344.521	303.872	95	99	0.5	88	15597.7	45	59	72	33	0	2.1	9.9	3.5	5	4.2	1.3	1.3	2.6	1.4	1.4	0	115	397	282	245.217
BB1DCD70FD	YK1895	81157_2	81158_1	F	HIGH FAT	2023-04-19	2	14	49792	16582	33210	6997	6733.33	263.667	0.0404007	0.854444	0.0529108	0.807934	-0.0125101	0.0465102	96.8057	172.584	51	50	NA	85	17662.5	70	60	76	51	0	1.8	5.2	0.8	1.2	0.5	0.6	0.6	1.2	0.7	0.7	0	79	207	128	162.025
BB1DCD70FE	YK1909	80856_2	80876_1	F	LOW FAT	2023-04-27	2	12	NA	NA	NA	NA	NA	NA	0.0551587	0.847175	0.0549367	0.826118	0.000222021	0.0210565	166.897	172.598	84	68	0.2	86	15300	74	111	49	30	0	1.8	5.8	2	3.5	1.2	0.6	0.7	1.3	0.9	1	3	97	229	132	136.082
BB1DCD70FF	YK1941	81155_2	80853_1	F	HIGH FAT	2023-05-17	3	13	60439	22962	37477	8648.5	7570	1078.5	0.0732029	0.847884	0.0304301	0.860995	0.0427728	-0.0131106	346.201	82.6595	66	52	0.333333	76	15865.9	71	59	74	42	0	1.7	5.7	2.7	4.2	1.6	0.7	0.8	1.5	1	1	0	94	254	160	170.213
BB1DCD7100	YK1923	80923_2	80946_1	F	LOW FAT	2023-05-09	3	8	115790	66986	48804	18171.5	16505.7	1665.83	0.126886	0.851835	0.102716	0.790288	0.0241695	0.061547	201.963	163.482	114	122	0.4	86	13725	104	73	69	35	0	1.7	8.2	4.2	5.7	NA	0.9	0.9	1.8	NA	NA	NA	92	248	156	169.565
BB1DCD7101	YK1953	81317_2	81156_1	F	HIGH FAT	2023-05-24	2	11	NA	NA	NA	NA	NA	NA	0.145525	0.767641	0.0648333	0.838767	0.0806918	-0.0711259	391.568	100.429	61	65	NA	NA	NA	NA	NA	NA	NA	NA	1.8	6.6	3.7	8.1	2.3	0.7	0.7	1.4	0.9	1.2	0	112	244	132	117.857
BB1DCD7102	YK1885	80853_2	80882_1	F	LOW FAT	2023-04-14	2	12	46660	18454	28206	7383.5	5885.33	1498.17	0.114434	0.783657	0.0716461	0.809095	0.0427876	-0.0254377	306.203	146.325	66	74	0.333333	82	17092.5	78	73	44	24	0	1.8	6.4	2.6	6.2	2.5	0.8	0.8	1.6	0.8	1	0	97	224	127	130.928
BB1DCD7103	YK1916	80908_2	80932_1	M	LOW FAT	2023-04-30	3	5	NA	NA	NA	NA	NA	NA	0.166704	0.760785	0.0644365	0.822134	0.102267	-0.0613491	737.551	199.583	141	127	1.8	98	21390	77	143	59	41	0	1.9	15	15.2	13.1	NA	1.4	1.4	2.8	NA	NA	NA	160	455	295	184.375
BB1DCD7104	YK1888	81258_2	81293_1	M	HIGH FAT	2023-04-18	1	9	NA	NA	NA	NA	NA	NA	0.162752	0.770799	0.0508683	0.838627	0.111884	-0.0678284	1010.41	218.989	94	74	0.6	87	15660	87	73	113	102	0	2.3	11.8	10.9	7.6	4.2	1.4	1.3	2.7	1.1	1.5	0	136	433	297	218.382
BB1DCD7105	YK1935	80933_2	81259_1	F	LOW FAT	2023-05-15	2	7	53735	17935	35800	6750	6568.67	181.333	0.0427232	0.860179	0.0501695	0.861469	-0.00744628	-0.00129036	61.6554	89.5462	81	89	0.866667	80	12498.2	81	65	79	28	0	2	7.9	1.6	1.5	1.6	1	0.9	1.9	1.8	1.7	0	136	250	114	83.8235
BB1DCD7106	YK1939	81154_2	80922_1	F	HIGH FAT	2023-05-18	3	11	74123	24137	49986	11853.5	9280.67	2572.83	0.0754932	0.832313	0.0785065	0.824784	-0.0030133	0.00752938	22.3876	28.4346	94	53	0.133333	77	17455.3	60	56	65	29	0	1.9	5.2	2.2	3.4	1	1.1	NA	NA	0.7	0.9	0	91	215	124	136.264
BB1DCD7107	YK1926	80213_2	80556_1	M	LOW FAT	2023-05-10	6	8	42640	17197	25443	7419	4692.33	2726.67	0.133807	0.801546	0.0682828	0.827138	0.0655241	-0.025592	638.314	265.11	123	102	1.1	106	15682.5	84	132	61	32	0	2.1	12.3	9.6	9.7	NA	1.1	1.2	2.3	NA	NA	NA	126	404	278	220.635
BB1DCD7108	YK1951	80250_2	80168_1	F	HIGH FAT	2023-05-24	9	7	NA	NA	NA	NA	NA	NA	0.187484	0.735798	0.0556554	0.831723	0.131829	-0.0959246	887.887	159.436	77	49	NA	NA	NA	NA	NA	NA	NA	NA	1.9	7.1	5.2	10.3	3.7	0.9	0.9	1.8	1	1.4	0	104	273	169	162.5
BB1DCD7109	YK1956	80217_2	80376_1	M	HIGH FAT	2023-05-25	8	7	NA	NA	NA	NA	NA	NA	0.158691	0.778386	0.0447138	0.855017	0.113977	-0.0766313	1387.73	281.622	91	85	NA	NA	NA	NA	NA	NA	NA	NA	2	11.8	11.6	10.1	5.7	1.3	1.3	2.6	1.2	1.8	2	120	436	316	263.333
BB1DCD710A	YK1949	80916_2	80892_1	F	LOW FAT	2023-05-24	4	5	NA	NA	NA	NA	NA	NA	0.0563383	0.830493	0.0630333	0.8052	-0.00669507	0.0252926	81.4384	109.377	65	61	NA	NA	NA	NA	NA	NA	NA	NA	2	5.2	1.5	3.3	1	0.8	0.8	1.6	0.9	0.8	0	114	198	84	73.6842
BB1DCD710C	YK1903	80890_2	80879_1	F	HIGH FAT	2023-04-26	3	14	48389	18779	29610	7413.5	6005.33	1408.17	0.113519	0.797457	0.0592063	0.829563	0.054313	-0.0321061	390.751	146.046	55	57	0.666667	108	15727.5	52	59	54	30	0	1.7	6.7	2.1	4.7	2.1	0.8	0.7	1.5	0.8	1	0	98	235	137	139.796
BB1DCD710D	YK1927	80213_2	80556_1	F	HIGH FAT	2023-05-10	6	8	NA	NA	NA	NA	NA	NA	0.115864	0.798515	0.0717255	0.815098	0.0441381	-0.0165829	318.097	153.558	66	69	0.133333	73	18247.5	71	70	65	46	0	1.8	6	3.1	6.8	NA	0.8	0.9	1.7	NA	NA	NA	103	242	139	134.951
BB1DCD710E	YK1919	81251_2	81253_1	F	HIGH FAT	2023-05-02	1	9	56123	22681	33442	7298.5	7216	82.5	0.0887111	0.830267	0.0652189	0.824613	0.0234923	0.00565387	209.138	128.831	58	65	0.266667	88	16815	63	82	65	34	0	1.8	6.7	2.4	6.1	NA	0.8	0.8	1.6	NA	NA	NA	114	253	139	121.93
BB1DCD710F	YK1894	81157_2	81158_1	M	LOW FAT	2023-04-19	2	14	39618	16069	23549	5883	4673.67	1209.33	0.0762121	0.842197	0.0554167	0.786061	0.0207955	0.0561364	381.34	274.995	81	72	1	105	16530	87	153	54	30	0	1.9	8	4.7	3.5	2.4	1	0.9	1.9	1	1.4	0	100	328	228	228
BB1DCD7110	YK1911	80165_2	80266_1	F	LOW FAT	2023-04-30	7	6	NA	NA	NA	NA	NA	NA	0.117831	0.800011	0.0450617	0.855284	0.0727688	-0.0552727	471.397	104.397	93	95	0.3	89	18870	56	69	46	27	0	2.2	10.3	3.6	8.1	NA	1	1	2	NA	NA	NA	152	289	137	90.1316
BB1DCD7111	YK1889	81258_2	81293_1	F	LOW FAT	2023-04-18	1	9	49817	19795	30022	6855	6246	609	0.0368485	0.839212	0.0573626	0.825311	-0.0205142	0.0139008	16.4751	84.3726	71	79	0.2	69	12592.5	61	64	54	29	0	1.9	5.7	1.1	2.1	1.2	0.8	0.8	1.6	1	1.1	3	100	208	108	108
BB1DCD7113	YK1917	80908_2	80932_1	F	HIGH FAT	2023-04-30	3	5	49369	17006	32363	6509.5	6565.67	-56.1667	0.179887	0.738164	0.0553651	0.828889	0.124522	-0.0907254	720.011	124.757	94	75	0.766667	92	18300	66	60	62	44	0	1.6	7.9	5.6	11	NA	0.8	0.8	1.6	NA	NA	NA	117	286	169	144.444
BB1DCD7114	YK1907	80934_2	80851_1	F	LOW FAT	2023-04-27	3	9	44562	15995	28567	6232	5439.33	792.667	0.0363351	0.862949	0.0537255	0.830588	-0.0173904	0.0323612	51.9708	133.461	61	76	0.1	78	12615	NA	NA	NA	NA	NA	1.9	5.5	1.1	2.2	1.1	0.7	0.6	1.3	0.8	0.8	0	100	221	121	121
BB1DCD7115	YK1955	80375_2	80226_1	F	LOW FAT	2023-05-24	7	14	59665	24904	34761	7882.5	7681.67	200.833	0.0822837	0.834411	0.0694902	0.812863	0.0127935	0.0215486	227.37	183.8	85	98	NA	NA	NA	NA	NA	NA	NA	NA	1.8	7.8	2.7	4.3	1.6	0.9	0.9	1.8	0.9	0.8	0	104	246	142	136.538
BB1DCD7116	YK1924	80662_2	80925_1	M	HIGH FAT	2023-05-10	4	13	NA	NA	NA	NA	NA	NA	NA	NA	0.0474737	0.810947	NA	NA	NA	NA	NA	NA	NA	NA	NA	NA	NA	NA	NA	NA	NA	NA	NA	NA	NA	NA	NA	NA	NA	NA	NA	116	NA	NA	NA
BB1DCD7117	YK1900	80910_2	80886_1	M	HIGH FAT	2023-04-25	3	10	44683	15857	28826	5930.5	5912.67	17.8333	0.177517	0.748384	0.0741026	0.82584	0.103414	-0.0774566	710.804	206.717	98	87	1.3	97	15592.5	87	104	59	36	0	2	11.7	14.5	11.7	4.3	1.2	1.3	2.5	1.2	1.3	2	134	438	304	226.866
BB1DCD7118	YK1950	80250_2	80168_1	M	LOW FAT	2023-05-24	9	7	42764	17896	24868	6442	5134.33	1307.67	0.0876085	0.843758	0.0518413	0.844762	0.0357672	-0.00100383	481.017	243.401	98	92	NA	NA	NA	NA	NA	NA	NA	NA	2	10	6.9	4	3.5	0.2	1.2	1.4	1.1	1.2	2	112	394	282	251.786
BB1DCD7119	YK1902	80890_2	80879_1	M	LOW FAT	2023-04-26	3	14	NA	NA	NA	NA	NA	NA	0.130021	0.801911	0.0642199	0.81883	0.0658009	-0.0169191	591.386	234.433	101	84	NA	99	16042.5	69	124	74	29	0	2	6.2	7	4.8	3	1	1	2	1.1	0.8	2	112	322	210	187.5
BB1DCD711A	YK1898	80876_2	80908_1	M	HIGH FAT	2023-04-24	3	9	NA	NA	NA	NA	NA	NA	0.181335	0.76051	0.0618056	0.846111	0.119529	-0.0856009	858.427	193.618	85	67	1.1	105	21772.5	86	78	45	31	0	2	10	15.5	7.8	5.3	1.3	1.3	2.6	1.4	1.8	2	122	418	296	242.623
BB1DCD711B	YK1899	80876_2	80908_1	F	LOW FAT	2023-04-24	3	9	NA	NA	NA	NA	NA	NA	0.143062	0.770744	0.0722324	0.819297	0.0708291	-0.0485527	323.37	101.094	76	74	0.266667	76	13290	105	156	56	34	0	1.8	6.8	3	7.8	4.6	0.9	0.8	1.7	0.9	0.4	0	120	234	114	95
BB1DCD711D	YK1933	81210_1	81155_1	F	LOW FAT	2023-05-11	3	10	47045	17829	29216	7725	5738.67	1986.33	0.0910491	0.805871	0.0486594	0.811304	0.0423896	-0.00543294	300.67	112.696	64	75	NA	71	16365	60	65	58	27	0	1.9	6	1.8	4.7	NA	0.8	0.8	1.6	NA	NA	NA	104	215	111	106.731
BB1DCD711E	YK1906	80934_2	80851_1	M	HIGH FAT	2023-04-27	3	9	53492	19363	34129	6840	7030	-190	0.147232	0.787838	0.0768864	0.824103	0.0703459	-0.0362642	594.426	246.68	68	59	0.8	99	16035	74	93	63	38	0	2	7.8	8.5	6.4	5.7	1.1	1	2.1	1.3	1.2	1	107	356	249	232.71
BB1DCD711F	YK1921	81158_2	80931_1	F	HIGH FAT	2023-05-03	3	12	59563	21031	38532	8566.5	7274.33	1292.17	0.0997639	0.817639	0.0598227	0.838511	0.0399412	-0.0208717	325.785	148.964	62	64	0.233333	85	17647.5	58	74	62	44	0	1.8	6.7	3.8	6.5	NA	0.8	0.7	1.5	NA	NA	NA	110	261	151	137.273
BB1DCD7121	YK1943	81157_2	81158_1	F	HIGH FAT	2023-05-18	3	13	113750	54263	59487	13959	19331.3	-5372.33	0.0476096	0.869655	0.0509804	0.816392	-0.00337083	0.0532626	175.769	214.56	62	60	NA	103	18573.7	80	56	75	37	0	1.9	5.7	1.7	2.4	0.5	0.7	0.7	1.4	1	1.4	1	104	266	162	155.769
BB1DCD7122	YK1945	80668_2	80163_1	F	HIGH FAT	2023-05-18	5	9	55247	23927	31320	8786	6392	2394	0.176329	0.742955	0.0669892	0.826022	0.10934	-0.083066	599.09	138.883	65	60	0.7	83	17433.6	48	62	63	28	0	1.8	5.6	6.2	9.5	3.1	NA	1.2	NA	0.8	0.7	0	112	273	161	143.75
BB1DCD7123	YK1915	80939_1	80662_1	F	HIGH FAT	2023-05-01	3	5	NA	NA	NA	NA	NA	NA	0.0997547	0.802987	0.0615705	0.830128	0.0381842	-0.0271412	259.865	114.853	92	58	0.566667	85	16852.5	67	50	44	32	0	1.7	7.3	3.1	6.2	NA	0.7	0.7	1.4	NA	NA	NA	115	250	135	117.391
BB1DCD7124	YK1914	80939_1	80662_1	M	LOW FAT	2023-05-01	3	5	NA	NA	NA	NA	NA	NA	0.164272	0.772654	0.0835937	0.817318	0.0806781	-0.044664	532.523	204.285	122	111	3.1	110	20452.5	100	129	35	24	0	1.8	15.1	10.1	10.2	NA	1.5	1.5	3	NA	NA	NA	150	418	268	178.667
BB1DCD7125	YK1883	81308_1	81255_1	F	LOW FAT	2023-04-13	1	10	NA	NA	NA	NA	NA	NA	0.0739841	0.84	0.0564368	0.841762	0.0175473	-0.00176245	216.429	140.874	78	79	0.3	86	14992.5	NA	NA	NA	NA	NA	1.8	6.6	1.9	3.8	1.7	0.8	0.8	1.6	0.8	1.4	0	102	231	129	126.471
BB1DCD7126	YK1948	80916_2	80892_1	M	HIGH FAT	2023-05-24	4	5	NA	NA	NA	NA	NA	NA	0.210111	0.737689	0.0642257	0.845643	0.145885	-0.107954	1059.17	209.097	99	83	NA	NA	NA	NA	NA	NA	NA	NA	1.9	12.5	21.8	17.6	8.1	1.4	1.4	2.8	1.4	1.8	1	149	479	330	221.477
BB1DCD7127	YK1952	81317_2	81156_1	M	LOW FAT	2023-05-24	2	11	35411	11587	23824	5467	4184	1283	0.08742	0.836605	0.0426736	0.846562	0.0447464	-0.00995775	589.26	232.501	80	79	NA	NA	NA	NA	NA	NA	NA	NA	1.9	7.8	5.2	3.3	2.5	1.1	1.1	2.2	1.1	0.8	1	117	348	231	197.436
BB1DCD7128	YK1934	80933_2	81259_1	M	HIGH FAT	2023-05-15	2	7	36865	14893	21972	5255.5	4290.67	964.833	0.211432	0.723098	0.0534222	0.841111	0.158009	-0.118013	2295.76	420.402	76	62	3.6	114	17264.1	54	117	242	77	0	2.7	11	15.6	11	6.1	1.2	1.3	2.5	1.2	1.6	3	180	466	286	158.889
BB1DCD7129	YK1925	80662_2	80925_1	F	LOW FAT	2023-05-10	4	13	38167	16112	22055	5823	4572.67	1250.33	0.0368269	0.838173	0.0387778	0.858926	-0.00195085	-0.0207528	119.484	125.527	57	71	0.1	80	17565	52	59	68	33	0	1.9	5.5	1.3	2.5	NA	0.7	0.7	1.4	NA	NA	NA	106	226	120	113.208
BB1DCD712A	YK1942	81157_2	81158_1	M	LOW FAT	2023-05-18	3	13	NA	NA	NA	NA	NA	NA	0.108234	0.816433	0.0570741	0.865185	0.0511597	-0.0487523	711.226	303.673	102	83	1.2	105	17953	93	107	144	44	0	2	10.9	7.5	4.4	3.9	1.2	1.2	2.4	1.4	1.7	0	115	417	302	262.609
BB1DCD712B	YK1890	81071_1	81100_1	M	LOW FAT	2023-04-18	3	13	42749	15246	27503	6195	5245.33	949.667	0.152833	0.782574	0.0872667	0.812833	0.0655667	-0.0302593	530.481	246.598	105	92	2	97	15097.5	98	143	54	27	0	1.9	12	10.4	8.3	3.9	1.1	1.1	2.2	1.4	1.7	2	125	386	261	208.8
BB1DCD712C	YK1904	80948_2	81154_1	M	LOW FAT	2023-04-26	3	11	NA	NA	NA	NA	NA	NA	0.0737318	0.852575	0.0419142	0.853795	0.0318176	-0.00122006	497.402	239.119	110	85	0.6	94	16425	77	84	69	37	0	2	10	4.9	2.9	2.5	1.1	1.2	2.3	1.4	1.3	0	121	358	237	195.868
BB1DCD712D	YK1891	81071_1	81100_1	F	HIGH FAT	2023-04-18	3	13	NA	NA	NA	NA	NA	NA	0.0683092	0.850354	0.0490476	0.82377	0.0192616	0.0265844	243.204	154.381	55	51	NA	77	16665	53	49	61	45	0	1.9	5.5	2.4	3.2	1.2	0.7	0.6	1.3	0.8	0.8	0	103	228	125	121.359
BB1DCD712E	YK1957	80217_2	80376_1	F	LOW FAT	2023-05-25	8	7	56880	21619	35261	7974.5	7118.33	856.167	0.0765939	0.837613	0.0582986	0.844028	0.0182953	-0.00641497	213.401	136.729	68	77	NA	NA	NA	NA	NA	NA	NA	NA	2	7.2	3.3	5.2	2.5	0.8	0.7	1.5	0.9	1.1	0	116	256	140	120.69
BB1DCD712F	YK1892	81255_2	81307_1	M	LOW FAT	2023-04-18	1	9	44374	13804	30570	6211	5578	633	0.0494222	0.877102	0.0458407	0.838732	0.00358151	0.0383707	257.786	247.04	113	116	0.3	91	12967.5	58	60	49	29	0	2.1	10.4	4.8	4.7	3	1.3	1.4	2.7	1.3	1.8	0	136	419	283	208.088
BB1DCD7130	YK1940	81155_2	80853_1	M	LOW FAT	2023-05-17	3	13	NA	NA	NA	NA	NA	NA	0.101778	0.821065	0.0561165	0.836214	0.0456618	-0.0151483	583.218	269.875	101	85	1.4	90	13618.2	89	109	188	55	0	1.9	10.9	9	9.1	4.5	1.2	1.2	2.4	1.3	1.5	0	122	412	290	237.705
BB1DCD7131	YK1938	81154_2	80922_1	M	LOW FAT	2023-05-18	3	11	NA	NA	NA	NA	NA	NA	0.1445	0.773565	0.0693537	0.828333	0.0751463	-0.0547685	665.375	243.058	111	102	1.7	95	18012.8	99	79	70	34	0	2	13.8	10.5	7.9	4.7	1.2	1.2	2.4	1.5	1.9	2	120	390	270	225
BB1DCD7132	YK1937	81326_1	81251_1	F	LOW FAT	2023-05-16	1	11	NA	NA	NA	NA	NA	NA	0.142617	0.756157	0.058141	0.838333	0.0844761	-0.0821763	470.783	109.883	112	97	0.8	84	16316	90	61	138	39	0	19	7.2	4.6	9.4	2.8	1	1	2	1	1.1	0	121	264	143	118.182
BB1DCD7133	YK1887	80888_2	80919_1	F	LOW FAT	2023-04-18	2	8	61360	24715	36645	8026	7944	82	0.0552525	0.838434	0.0778544	0.80682	-0.0226019	0.0316144	61.5157	136.504	65	83	NA	80	14055	57	53	62	28	0	1.9	5.3	2.1	3.7	1.3	0.7	0.7	1.4	0.7	1.25	3	100	225	125	125
BB1DCD7134	YK1929	80171_2	80325_1	F	HIGH FAT	2023-05-10	6	8	NA	NA	NA	NA	NA	NA	0.175784	0.764689	0.0779935	0.824207	0.0977901	-0.0595181	486.432	141.405	65	67	0.333333	95	16312.5	58	46	66	28	0	1.6	6.4	7	10	NA	0.7	0.9	1.6	NA	NA	NA	121	272	151	124.793
BB1DCD7135	YK1936	81326_1	81251_1	M	HIGH FAT	2023-05-16	1	11	49665	16600	33065	7369	5930.67	1438.33	0.0933166	0.834478	0.0635088	0.808114	0.0298079	0.0263638	671.409	442.128	105	83	1.4	102	15883.3	62	68	108	47	0	2.2	10	9.5	6.2	3.1	2.1	0.4	2.5	1.3	1.2	2	150	430	280	186.667
BB1DCD7136	YK1901	80910_2	80886_1	F	LOW FAT	2023-04-25	3	10	NA	NA	NA	NA	NA	NA	0.125189	0.789748	0.061732	0.820033	0.0634567	-0.0302843	321.493	100.167	70	68	0.166667	84	15435	64	88	63	30	0	1.9	5.7	3.1	5.9	2.1	0.7	0.7	1.4	0.8	0.7	0	113	209	96	84.9558
BB1DCD7137	YK1947	80850_2	80945_1	F	LOW FAT	2023-05-24	3	5	NA	NA	NA	NA	NA	NA	0.0868438	0.805008	0.0722772	0.821221	0.0145666	-0.0162131	146.256	100.904	73	71	NA	NA	NA	NA	NA	NA	NA	NA	1.8	5.6	2.1	5	1.9	1.4	NA	NA	0.9	1.1	0	118	208	90	76.2712
BB1DCD7138	YK1896	80931_2	80934_1	M	LOW FAT	2023-04-19	3	4	42103	15411	26692	6273.5	4844.67	1428.83	NA	NA	NA	NA	NA	NA	NA	NA	110	98	1.6	91	14107.5	83	155	49	26	0	2	11.3	9.8	10.5	4.8	1.3	1.3	2.6	1.4	1.4	0	130	422	292	224.615
BB1DCD7139	YK1932	81210_1	81155_1	M	HIGH FAT	2023-05-11	3	10	NA	NA	NA	NA	NA	NA	0.154309	0.782308	0.0528819	0.845243	0.101427	-0.0629354	1124.95	288.535	110	88	1.7	92	15202.5	49	76	65	46	0	2	10.8	15.9	13.7	NA	1.4	1.3	2.7	NA	NA	NA	121	420	299	247.107
BB1DCD713A	YK1905	80948_2	81154_1	F	HIGH FAT	2023-04-26	3	11	60036	26386	33650	7642	7861.33	-219.333	0.0635284	0.827979	0.0530476	0.838381	0.0104807	-0.0104022	221.634	165.239	65	62	0.133333	89	16042.5	NA	NA	NA	NA	NA	1.7	6.4	1.7	2.5	1.2	0.7	0.7	1.4	0.8	1.1	0	84	214	130	154.762
BB1DCD713B	YK1893	81255_2	81307_1	F	HIGH FAT	2023-04-18	1	9	57078	23142	33936	6724	7419.67	-695.667	0.0808557	0.838352	0.0611458	0.827361	0.0197098	0.0109914	259.512	175.487	74	68	0.3	91	19380	49	47	59	26	0	1.9	6.3	2.6	5.3	1.4	0.9	0.8	1.7	1.1	0.7	0	110	281	171	155.455
BB1DCD713C	YK1897	80931_2	80934_1	F	HIGH FAT	2023-04-19	3	4	NA	NA	NA	NA	NA	NA	0.135021	0.784719	0.0720261	0.814379	0.0629944	-0.0296603	346.597	129.559	66	61	0.2	82	17932.5	60	55	64	36	0	1.8	5.8	4.8	9	2	0.8	0.8	1.6	1	1.3	0	108	249	141	130.556
BB1DCD713D	YK1931	80854_2	81157_1	F	LOW FAT	2023-05-10	3	10	51865	19505	32360	8184	6259.33	1924.67	0.0669637	0.832558	0.0605965	0.837228	0.00636721	-0.00467031	134.974	111.445	57	64	0.4	75	13245	NA	NA	NA	NA	NA	1.9	5.9	1.8	2.4	NA	0.8	0.8	1.6	NA	NA	NA	109	218	109	100
BB1DCD713E	YK1954	80375_2	80226_1	M	HIGH FAT	2023-05-24	7	14	NA	NA	NA	NA	NA	NA	0.106788	0.817453	0.0540741	0.848259	0.0527135	-0.0308068	746.986	313.313	84	79	NA	NA	NA	NA	NA	NA	NA	NA	2	11.7	9.5	8	3.6	1.4	1.4	2.8	1.1	1.5	2	116	409	293	252.586
BB1DCD713F	YK1912	80945_2	80885_1	M	HIGH FAT	2023-04-30	3	5	35306	14901	20405	4817.5	4384	433.5	0.148901	0.799011	0.059061	0.870047	0.0898401	-0.071036	707.83	194.261	118	85	1.7	101	19680	84	83	54	34	0	2	12	12.1	12.2	NA	1.6	1.6	3.2	NA	NA	NA	171	482	311	181.871
BB1DCD7140	YK1920	81158_2	80931_1	M	LOW FAT	2023-05-03	3	12	37835	17737	20098	6220	4115.67	2104.33	0.138208	0.786229	0.0703883	0.825599	0.06782	-0.0393695	510.023	195.865	66	68	1.2	93	20925	98	172	99	70	0	2	9.2	7.1	7.2	NA	1.1	1.1	2.2	NA	NA	NA	122	340	218	178.689
BB1DCD7141	YK1908	80856_2	80876_1	M	HIGH FAT	2023-04-27	2	12	45736	19109	26627	6493.5	5263.67	1229.83	0.171678	0.754933	0.0633721	0.816279	0.108306	-0.0613457	845.015	222.621	64	47	0.9	92	17175	71	72	51	44	0	2	6.6	8.8	6.1	3.5	1	1	2	1.2	1	0	107	314	207	193.458
BB1DCD7142	YK1913	80945_2	80885_1	F	LOW FAT	2023-04-30	3	5	NA	NA	NA	NA	NA	NA	0.0558333	0.875804	0.0506006	0.83988	0.00523273	0.0359242	126.647	114.191	77	76	0.3	87	15330	69	52	54	24	0	1.7	6.7	1.4	2.6	NA	0.6	0.6	1.2	NA	NA	NA	122	227	105	86.0656
BB1DCD7143	YK1918	81251_2	81253_1	M	LOW FAT	2023-05-02	1	9	NA	NA	NA	NA	NA	NA	0.0907619	0.833743	0.0518447	0.840421	0.0389172	-0.00667785	494.881	237.106	92	88	0.7	93	18652.5	76	130	56	28	0	1.9	10.2	6.3	7.3	NA	1.1	1.1	2.2	NA	NA	NA	125	374	249	199.2
BB1DCD7144	YK1946	80939_1	80662_1	M	HIGH FAT	2023-05-24	4	7	50472	17875	32597	6513	6339	174	0.173126	0.751054	0.0855229	0.791209	0.0876033	-0.0401551	634.314	244.335	67	54	NA	NA	NA	NA	NA	NA	NA	NA	1.9	11.1	9.1	10.9	4.5	1.2	1.1	2.3	1.2	1.5	2	122	398	276	226.23
BB1DCD7145	YK1928	80171_2	80325_1	M	LOW FAT	2023-05-10	6	8	44173	16962	27211	7279	5109.33	2169.67	0.152195	0.785528	0.0811304	0.816899	0.0710643	-0.0313705	625.902	272.097	116	103	1.5	104	15660	76	102	39	23	0	1.9	14	12.8	8	NA	1.3	1.3	2.6	NA	NA	NA	134	479	345	257.463
BB1DCD7147	YK1886	80888_2	80919_1	M	HIGH FAT	2023-04-18	2	8	NA	NA	NA	NA	NA	NA	0.126898	0.805502	0.0467687	0.842585	0.0801291	-0.0370828	938.255	265.812	72	66	1	91	19305	58	78	66	43	0	2	10.4	8.4	6.4	3.1	1.1	1.2	2.3	1.4	1	0	113	397	284	251.327
CC1DCD1D3B	YK1964	81256_2	81309_1	M	LOW FAT	2023-05-30	2	11	NA	NA	NA	NA	NA	NA	0.065303	0.870455	0.0425287	0.843525	0.0227743	0.0269296	521.261	317.515	108	77	0.6	75	11990.7	62	130	137	89	0	2.3	10.9	5	4.8	2.8	1.2	1.2	2.4	1	0.7	0	111	365	254	228.829
CC1DCD1D45	YK1963	80949_2	80856_1	F	HIGH FAT	2023-05-30	4	10	39830	19370	20460	5690	4603.33	1086.67	0.088619	0.803635	0.0513468	0.835488	0.0372722	-0.0318533	266.098	104.034	61	56	0.466667	90	13473	61	60	60	41	0	1.9	6.6	1.8	5	1.5	0.8	0.8	1.6	1	1	0	110	232	122	110.909
CC1DCD1D4A	YK1959	81259_2	81435_1	F	LOW FAT	2023-05-28	1	11	NA	NA	NA	NA	NA	NA	0.0549231	0.844239	0.066761	0.803113	-0.0118379	0.0411261	51.3424	93.3827	73	79	NA	80	7982.77	NA	NA	NA	NA	NA	1.9	6.6	2.2	2	2.1	0.7	0.7	1.4	0.9	0.5	0	117	209	92	78.6325
CC1DCD1D4E	YK1960	81253_2	81223_5	M	HIGH FAT	2023-06-01	3	6	NA	NA	NA	NA	NA	NA	0.250974	0.568598	0.082249	0.784859	0.168725	-0.216262	1359.52	246.518	85	85	2.2	107	16032.7	115	217	59	58	0	1.8	10.1	14.3	10.8	6.8	1.1	1	2.1	1.1	1.4	2	101	381	280	277.228
CC1DCD1D52	YK1965	81256_2	81309_1	F	HIGH FAT	2023-05-30	2	11	61015	30537	30478	8443	8075.67	367.333	0.0578761	0.857419	0.0327843	0.856314	0.0250918	0.00110515	369.378	166.225	70	60	0.166667	85	12498.3	77	52	75	53	0	2.1	6.3	1.6	4	1.3	0.9	0.8	1.7	1.1	1.2	0	100	251	151	151
CC1DCD1D58	YK1958	81259_2	81435_1	M	HIGH FAT	2023-05-28	1	11	NA	NA	NA	NA	NA	NA	0.129553	0.803899	0.0622609	0.831362	0.0672919	-0.0274636	614.711	232.132	90	90	1	97	15725.8	80	80	54	33	0	1.9	11.2	10	10.5	4	1.1	1.1	2.2	1.1	1.2	2	136	435	299	219.853
CC1DCD1D6F	YK1967	81379_1	81252_1	F	HIGH FAT	2023-05-31	2	13	49752	18952	30800	8256	5502.67	2753.33	0.128009	0.784136	0.0537153	0.834722	0.074294	-0.0505864	436.199	111.364	65	45	0.266667	94	16188.1	99	75	50	35	0	1.9	6.3	2	5.1	1.8	0.7	0.7	1.4	1	1.3	0	111	231	120	108.108
CC1DCD1D72	YK1969	80178_2	80375_1	F	HIGH FAT	2023-05-31	9	11	84895	41847	43048	17905	6702.67	11202.3	0.106073	0.798319	0.0616667	0.824479	0.0444068	-0.02616	322.86	138.033	75	70	0.6	91	12806	74	52	55	29	0	2.1	6	2.2	4.2	1.6	1.1	0.9	2	1.1	1.3	0	113	254	141	124.779
CC1DCD1D76	YK1966	81379_1	81252_1	M	LOW FAT	2023-05-31	2	13	38408	12793	25615	5673	4764.33	908.667	0.127702	0.801845	0.0541212	0.830545	0.0735811	-0.0287004	721.557	236.15	110	93	1	94	13408	95	126	61	32	0	2	10.9	9.3	3.2	4.3	1.3	1.2	2.5	1.3	0.9	1	130	411	281	216.154
CC1DCD1D79	YK1961	80934_2	80851_1	F	LOW FAT	2023-05-30	4	4	NA	NA	NA	NA	NA	NA	0.0717108	0.844462	0.0672274	0.824704	0.00448334	0.019758	88.4152	80.8673	80	78	NA	72	12670.2	68	66	71	33	0	1.8	5.2	2.8	3.3	1.8	0.7	0.6	1.3	1	0.6	0	117	197	80	68.3761
CC1DCD1D7D	YK1968	80178_2	80375_1	M	LOW FAT	2023-05-31	9	11	NA	NA	NA	NA	NA	NA	0.202537	0.719769	0.0680342	0.831681	0.134503	-0.111912	815.997	166.289	105	76	2.2	89	14015.2	108	194	56	30	0	1.9	8.5	12.1	6.7	4	1.1	1.2	2.3	1.1	1	0	137	362	225	164.234
CC1DCD1D86	YK1962	80949_2	80856_1	M	LOW FAT	2023-05-30	4	10	NA	NA	NA	NA	NA	NA	0.0744728	0.859558	0.0468827	0.845988	0.0275901	0.0135702	476.564	268.785	123	101	1	86	14660.1	78	116	60	29	0	2	11.2	8	5.2	3.9	1.2	1.2	2.4	1.5	1.4	1	121	405	284	234.711
CC1DCD1D89	YK1971	80947_2	80967_1	F	LOW FAT	2023-06-08	5	7	NA	NA	NA	NA	NA	NA	0.101254	0.79543	0.0745935	0.79878	0.0266608	-0.00335093	221.144	135.593	54	56	0.333333	82	14372.8	58	74	53	25	0	1.7	3.6	1.5	4.9	1.3	0.8	0.7	1.5	0.8	1.9	0	92	195	103	111.957
CC1DCD1D8A	YK2071	81472_2	81461_1	F	HIGH FAT	2023-08-02	2	12	NA	NA	NA	NA	NA	NA	0.154715	0.759398	0.059065	0.829065	0.0956504	-0.0696667	554.852	128.992	62	57	NA	74	15790.4	NA	NA	NA	NA	NA	1.9	6.8	4.9	8.6	1.8	0.8	0.8	1.6	1	0.8	0	91	208	117	128.571
CC1DCD1D8B	YK2055	81254_2	81257_1	F	LOW FAT	2023-07-23	3	4	NA	NA	NA	NA	NA	NA	0.0808299	0.82298	0.0517822	0.822409	0.0290478	0.000570351	278.649	142.742	83	67	0.133333	83	13758.5	NA	NA	NA	NA	NA	1.9	7.8	2.7	5.5	NA	0.7	0.7	1.4	NA	NA	1	106	252	146	137.736
CC1DCD1D8C	YK2000	80932_2	80904_1	M	LOW FAT	2023-06-21	5	4	NA	NA	NA	NA	NA	NA	0.0777969	0.863399	0.0732738	0.81994	0.00452308	0.0434584	285.825	282.653	128	129	0.3	91	16895.9	71	75	65	33	0	2.1	13.1	7.3	5.1	3.5	1.5	1.5	3	1.6	1.4	3	133	428	295	221.805
CC1DCD1D8D	YK2033	80889_2	80875_1	F	LOW FAT	2023-07-10	6	7	NA	NA	NA	NA	NA	NA	0.0928889	0.800413	0.0851887	0.880629	0.00770021	-0.0802162	116.021	80.0671	81	71	0.366667	81	14350.5	73	70	53	27	0	19	6.7	2.4	6.1	2.1	1	1	2	0.9	1.2	0	128	212	84	65.625
CC1DCD1D8E	YK1997	80910_2	80886_1	F	LOW FAT	2023-06-20	5	9	NA	NA	NA	NA	NA	NA	0.143519	0.773148	0.0590523	0.81902	0.0844662	-0.0458715	457.554	116.563	89	98	1.05	80	12205.9	65	106	52	29	0	1.9	8.6	4.4	8.2	2.2	1.1	1.1	2.2	1.1	1.4	2	116	237	121	104.31
CC1DCD1D8F	YK2028	80982_1	80887_1	M	HIGH FAT	2023-07-03	5	13	NA	NA	NA	NA	NA	NA	0.139501	0.800618	0.0451515	0.831448	0.0943493	-0.0308302	1129.6	283.223	97	71	1.5	70	15823.2	83	134	58	52	0	2	10.2	8.1	12.3	3.6	1.2	1.2	2.4	1.2	1.6	2	118	406	288	244.068
CC1DCD1D90	YK2048	81510_2	81438_1	M	LOW FAT	2023-07-19	1	13	NA	NA	NA	NA	NA	NA	0.0997222	0.850093	0.045754	0.835675	0.0539683	0.014418	647.268	248.772	89	91	0.1	83	14351.7	82	109	54	37	0	1.8	8.7	5.2	4.1	2.1	1	1	2	1.1	1.2	3	101	309	208	205.941
CC1DCD1D91	YK2049	81510_2	81438_1	F	HIGH FAT	2023-07-19	1	13	44369	16664	27705	5575	6247.33	-672.333	0.059537	0.879	0.0536905	0.827857	0.00584656	0.0511429	137.62	127.524	61	57	NA	91	13412.5	NA	NA	NA	NA	NA	1.8	5.4	1.4	2.2	0.6	0.8	0.7	1.5	0.9	0.9	0	93	206	113	121.505
CC1DCD1D92	YK1988	80948_2	81154_1	M	LOW FAT	2023-06-16	5	3	50104	17653	32451	7606.5	5951.33	1655.17	0.0792929	0.844619	0.0557547	0.826635	0.0235382	0.0179837	387.028	249.903	114	102	0.5	89	14270.2	108	68	70	39	0	2	10	6.1	4.1	3.8	NA	1.9	NA	1.3	2.1	1	129	388	259	200.775
CC1DCD1D93	YK1998	80922_2	81074_1	M	LOW FAT	2023-06-20	5	6	NA	NA	NA	NA	NA	NA	0.0792076	0.855323	0.069269	0.823333	0.00993857	0.0319897	288.181	252.664	120	123	0.3	93	15538.1	64	86	54	27	0	2.1	10.9	7.4	4.4	3.2	1.3	1.3	2.6	1.3	0.7	0	132	402	270	204.545
CC1DCD1D94	YK2059	81474_2	81433_1	F	HIGH FAT	2023-07-24	1	5	NA	NA	NA	NA	NA	NA	0.116543	0.806831	0.0605397	0.836571	0.0560035	-0.0297402	345.517	123.201	62	65	NA	92	15243.5	63	70	63	42	0	1.8	7	3.7	7.3	NA	0.9	1	1.9	NA	NA	1	118	249	131	111.017
CC1DCD1D95	YK2040	81508_2	81402_1	M	LOW FAT	2023-07-13	1	6	NA	NA	NA	NA	NA	NA	0.0812276	0.853768	0.0524074	0.827481	0.0288202	0.0262862	507.915	304.682	98	81	2	105	14240.2	109	100	55	38	0	2.1	10.1	5.9	5.1	3.1	1.3	1.2	2.5	1.1	1.5	0	110	370	260	236.364
CC1DCD1D96	YK2061	81156_2	81317_1	F	HIGH FAT	2023-07-25	4	15	NA	NA	NA	NA	NA	NA	0.0678231	0.836241	0.0532959	0.83367	0.0145272	0.00257108	180.253	120.904	57	65	0.366667	81	13727.9	73	54	61	43	0	1.7	5.7	1.7	3.7	NA	0.7	0.7	1.4	NA	NA	0	100	207	107	107
CC1DCD1D97	YK2045	81420_2	81492_1	F	LOW FAT	2023-07-18	1	9	NA	NA	NA	NA	NA	NA	0.0691176	0.886303	0.0597115	0.832083	0.00940611	0.0542192	164.895	143.758	91	85	0.133333	80	15108.5	83	60	71	35	0	1.9	6	2.4	3.6	1.2	0.8	0.8	1.6	0.7	0.7	1	119	240	121	101.681
CC1DCD1D98	YK2032	80889_2	80875_1	M	HIGH FAT	2023-07-10	6	7	NA	NA	NA	NA	NA	NA	0.230276	0.714	0.0873095	0.820119	0.142966	-0.106119	719.498	170.51	100	76	1.7	98	15756.4	133	149	70	68	0	2.2	12.4	15.4	10.6	5.8	1.5	1.4	2.9	1.3	1.2	3	162	447	285	175.926
CC1DCD1D99	YK2029	80982_1	80887_1	F	LOW FAT	2023-07-03	5	13	65871	26929	38942	7986	8739	-753	0.0562519	0.859037	0.05	0.831571	0.00625185	0.0274662	190.958	167.163	81	98	0.233333	78	16045.7	64	38	71	40	0	1.9	7.5	1.7	3.7	1.6	0.9	0.9	1.8	1.1	1.4	0	100	250	150	150
CC1DCD1D9A	YK1982	81013_2	80888_1	M	HIGH FAT	2023-06-13	4	11	40993	12354	28639	6637	4913.67	1723.33	0.171231	0.767313	0.0802521	0.812353	0.0909784	-0.0450399	667.4	239.723	91	73	1.8	107	16296.3	64	72	67	53	52.5	2	11.4	10.3	9.8	4.5	1.1	1.2	2.3	1.3	1.8	3	140	448	308	220
CC1DCD1D9B	YK2038	81423_2	81472_1	M	LOW FAT	2023-07-12	1	10	NA	NA	NA	NA	NA	NA	0.186997	0.744538	0.0846855	0.822547	0.102312	-0.0780088	614.519	192.897	91	70	2.1	94	15815	93	176	58	41	0	1.9	12.2	7.9	7.2	3.6	1.2	1.2	2.4	1.3	1.6	3	131	345	214	163.359
CC1DCD1D9C	YK2027	81379_1	81252_1	F	LOW FAT	2023-07-03	3	12	62018	33148	28870	8450	7568	882	0.0804382	0.822034	0.065913	0.832377	0.0145251	-0.0103424	126.033	82.916	85	92	0.333333	78	13645.5	NA	NA	NA	NA	NA	1.7	5.6	1.5	4.4	1.2	0.8	0.8	1.6	0.9	1.1	1	128	228	100	78.125
CC1DCD1D9D	YK2021	80850_2	80945_1	F	LOW FAT	2023-07-03	4	8	46665	20741	25924	5744	5991.33	-247.333	0.0425942	0.857217	0.0488095	0.831131	-0.00621532	0.0260864	79.2073	111.803	72	83	0.266667	79	12835.8	70	53	51	19	0	1.6	6.1	1.3	3.2	1.5	0.9	0.8	1.7	1	1.4	0	121	249	128	105.785
CC1DCD1D9E	YK2004	81254_2	81257_1	M	HIGH FAT	2023-06-24	2	13	NA	NA	NA	NA	NA	NA	0.134558	0.797418	0.0531224	0.828017	0.0814353	-0.0305992	938.84	294.97	61	63	1.2	89	16489.7	53	66	57	36	0	1.9	9.8	6.2	11.3	3.4	NA	1.8	NA	1.2	1.7	0	98	344	246	251.02
CC1DCD1D9F	YK2013	81437_1	81256_1	F	HIGH FAT	2023-06-28	2	7	NA	NA	NA	NA	NA	NA	0.0965439	0.810754	0.0758519	0.810259	0.020692	0.000495127	168.701	111.24	54	57	0.3	70	13990.3	53	66	63	38	0	1.9	5.4	2.9	4.2	1.5	NA	1.1	NA	0.6	1.4	0	104	206	102	98.0769
CC1DCD1DA0	YK1975	81255_2	81307_1	F	HIGH FAT	2023-06-08	3	10	NA	NA	NA	NA	NA	NA	0.0797321	0.850789	0.0376503	0.821585	0.0420819	0.029204	677.649	280.266	64	62	0.2	81	15550.7	56	48	56	33	0	1.9	4.7	3.8	4.1	2	0.6	0.6	1.2	0.8	0.9	1	80	225	145	181.25
CC1DCD1DA1	YK2006	80917_2	81013_1	M	HIGH FAT	2023-06-26	5	12	39787	13850	25937	5767.5	5243	524.5	0.240154	0.697609	0.0631579	0.84193	0.176996	-0.144321	1127.45	167.472	81	82	1.8	93	18417.8	53	74	56	37	0	1.9	10.5	17.9	10.1	7.8	1.3	1.2	2.5	1.2	1.5	0	132	389	257	194.697
CC1DCD1DA2	YK2014	81156_2	81317_1	M	LOW FAT	2023-06-30	3	9	NA	NA	NA	NA	NA	NA	0.107971	0.833533	0.0575088	0.84614	0.0504622	-0.0126077	627.273	281.597	114	96	1.4	97	14457.9	75	99	52	33	0	2	10.5	6.4	5.4	3	1.3	1.2	2.5	1.3	1.3	2	102	382	280	274.51
CC1DCD1DA3	YK2057	81418_2	81630_1	F	LOW FAT	2023-07-23	1	13	NA	NA	NA	NA	NA	NA	0.079419	0.826101	0.058179	0.833611	0.0212399	-0.00751019	175.544	100.033	92	85	0.833333	69	11050.6	72	66	61	26	0	1.9	7	3	2.7	NA	0.9	0.8	1.7	NA	NA	0	118	227	109	92.3729
CC1DCD1DA4	YK2018	81257_2	81362_1	M	HIGH FAT	2023-07-03	3	10	NA	NA	NA	NA	NA	NA	0.143371	0.800516	0.0717681	0.823043	0.0716028	-0.022527	516.68	200.247	65	63	1.2	96	15305.2	63	64	55	32	0	1.9	8.8	11.1	8.7	3.4	1.2	1.2	2.4	1.3	1.6	3	139	367	228	164.029
CC1DCD1DA5	YK2062	81432_2	81419_1	M	LOW FAT	2023-07-26	1	9	NA	NA	NA	NA	NA	NA	0.162787	0.766303	0.0854203	0.806029	0.0773671	-0.0397263	476.688	187.694	105	88	1.4	91	12747.6	NA	NA	NA	NA	NA	1.9	10.1	8.9	9.4	NA	1	0.9	1.9	NA	NA	2	134	354	220	164.179
CC1DCD1DA6	YK2044	81420_2	81492_1	M	HIGH FAT	2023-07-18	1	9	34277	14756	19521	4799.5	4230.33	569.167	0.164497	0.811258	0.06272	0.846693	0.101777	-0.0354355	789.626	225.004	91	68	2.1	95	18763.7	73	87	49	30	0	2	10.7	13.8	13.3	5	1.3	1.2	2.5	1.1	1.7	0	149	444	295	197.987
CC1DCD1DA7	YK2047	81492_2	81418_1	F	HIGH FAT	2023-07-18	1	9	34303	16565	17738	4310	4596.67	-286.667	0.100435	0.849354	0.0833333	0.81	0.0171021	0.0393544	170.263	135.137	64	63	0.433333	92	14913.1	68	64	75	32	0	1.8	6.6	3	5.6	1.5	0.8	0.8	1.6	1	1.1	0	111	241	130	117.117
CC1DCD1DA8	YK1983	81013_2	80888_1	F	LOW FAT	2023-06-13	4	11	49311	20343	28968	6233.5	6781.33	-547.833	0.069716	0.830553	0.0907862	0.800409	-0.0210702	0.0301443	61.5518	118.3	82	87	NA	80	15010.7	NA	NA	NA	NA	NA	2	6.9	2.4	4	2	1.1	1.1	2.2	1.1	1.3	0	119	246	127	106.723
CC1DCD1DA9	YK1980	80876_2	80908_1	M	HIGH FAT	2023-06-10	5	5	NA	NA	NA	NA	NA	NA	0.173656	0.751751	0.0652482	0.840745	0.108408	-0.0889935	1128.8	312.831	93	83	0.6	90	16806.2	80	91	47	32	0	2.2	10.8	19.4	9.6	4.9	1.4	1.3	2.7	1.4	1.4	3	119	445	326	273.95
CC1DCD1DAA	YK1970	81437_1	81256_1	M	HIGH FAT	2023-06-04	1	6	NA	NA	NA	NA	NA	NA	0.193372	0.750593	0.0870513	0.810462	0.106321	-0.0598683	629.632	204.198	74	64	2	91	18846.3	61	74	67	41	0	2.1	10.2	18	12.3	6.7	1.1	1.2	2.3	1.4	1.7	3	153	439	286	186.928
CC1DCD1DAB	YK1993	80891_2	80920_1	F	HIGH FAT	2023-06-16	5	8	NA	NA	NA	NA	NA	NA	0.0547765	0.862618	0.0631034	0.821648	-0.00832695	0.0409706	160.413	214.959	63	72	0.366667	84	15903.8	47	54	71	45	0	1.9	6.5	3	4.3	1.4	1.1	1.2	2.3	0.8	1.1	0	103	266	163	158.252
CC1DCD1DAC	YK2010	81259_2	81435_1	M	LOW FAT	2023-06-27	2	12	NA	NA	NA	NA	NA	NA	0.119424	0.818652	0.0635088	0.837865	0.055915	-0.019213	520.212	222.261	117	111	0.7	91	12935.5	96	NA	74	31	NA	2	10.9	8.7	7.3	3.5	1.4	1.3	2.7	1.3	1.3	2	137	398	261	190.511
CC1DCD1DAD	YK2054	81254_2	81257_1	M	HIGH FAT	2023-07-23	3	4	NA	NA	NA	NA	NA	NA	0.192106	0.754167	0.044096	0.85096	0.14801	-0.0967938	1554	236.476	84	75	2.5	99	19124	108	108	61	45	0	1.9	11.5	15.6	15.9	NA	1.2	1.3	2.5	NA	NA	3	137	458	321	234.307
CC1DCD1DAE	YK2051	81438_2	81613_1	F	LOW FAT	2023-07-19	1	10	70629	29537	41092	9217.5	9647.67	-430.167	0.0779298	0.833316	0.054878	0.823415	0.0230518	0.00990116	229.037	134.493	61	62	0.3	93	14800.2	78	66	53	24	0	1.9	5.3	2.6	2.8	0.9	0.8	0.7	1.5	0.8	1	1	98	208	110	112.245
CC1DCD1DAF	YK2002	81317_2	81156_1	M	HIGH FAT	2023-06-22	3	8	NA	NA	NA	NA	NA	NA	0.147027	0.795467	0.0615072	0.840522	0.0855202	-0.0450551	783.412	249.755	72	73	2.1	106	17376.2	97	77	51	36	0	2	12.2	12.1	8.9	5.3	1.4	1.3	2.7	1.5	1.2	3	136	434	298	219.118
CC1DCD1DB0	YK2034	81308_1	81255_1	M	LOW FAT	2023-07-11	4	10	NA	NA	NA	NA	NA	NA	0.1895	0.744237	0.0540453	0.83835	0.135454	-0.0941122	1305.93	255.958	132	113	0.8	102	15148.5	NA	NA	NA	NA	NA	2.1	15.4	12.1	10.3	7.6	1.4	1.2	2.6	1.4	1.6	3	130	425	295	226.923
CC1DCD1DB1	YK2039	81423_2	81472_1	F	HIGH FAT	2023-07-12	1	10	NA	NA	NA	NA	NA	NA	0.163257	0.739113	0.0774118	0.827294	0.0858451	-0.088181	440.881	129.133	64	58	0.5	99	17035.7	68	76	83	53	0	1.9	6.5	4.4	6.6	1.9	0.7	0.7	1.4	0.8	0.4	0	106	233	127	119.811
CC1DCD1DB2	YK1972	80919_2	80891_1	M	HIGH FAT	2023-06-06	4	8	NA	NA	NA	NA	NA	NA	0.180554	0.759333	0.0877778	0.806222	0.0927762	-0.0468889	595.443	218.432	83	74	1.1	88	18245.2	58	65	63	41	0	2	9.3	11.4	9.7	4.8	1.2	1.1	2.3	1.2	1.1	2	123	370	247	200.813
CC1DCD1DB3	YK2036	80920_2	80889_1	M	LOW FAT	2023-07-12	4	6	NA	NA	NA	NA	NA	NA	0.138899	0.779439	0.0582197	0.819205	0.0806796	-0.0397653	770.267	247.066	98	89	1.8	105	14832.1	94	190	64	35	0	2	9	7.1	6.7	4.1	1.2	1.2	2.4	1.2	1.2	0	106	324	218	205.66
CC1DCD1DB4	YK2011	81259_2	81435_1	F	HIGH FAT	2023-06-27	2	12	NA	NA	NA	NA	NA	NA	0.0582796	0.86129	0.0478544	0.847241	0.0104252	0.0140489	160.368	117.338	57	58	NA	72	14545.2	46	54	69	39	0	1.7	4.8	1.3	2.1	1.5	0.6	0.5	1.1	0.5	1.4	0	99	195	96	96.9697
CC1DCD1DB5	YK2005	81254_2	81257_1	F	LOW FAT	2023-06-24	2	13	NA	NA	NA	NA	NA	NA	0.074794	0.815337	0.0540084	0.756245	0.0207856	0.0590924	212.031	142.923	41	58	NA	68	15242.5	49	66	64	29	0	1.7	5.1	1.7	2.3	1.3	0.5	0.6	1.1	0.6	0.6	0	89	179	90	101.124
CC1DCD1DB6	YK2065	81591_2	81401_1	F	HIGH FAT	2023-07-27	1	12	NA	NA	NA	NA	NA	NA	0.0805922	0.824636	0.0577215	0.831983	0.0228707	-0.00734691	248.173	147.165	68	55	0.2	75	16165.4	63	54	56	36	0	1.7	5.8	2	2.9	NA	0.8	0.8	1.6	NA	NA	0	93	202	109	117.204
CC1DCD1DB7	YK2052	81252_2	81263_1	M	HIGH FAT	2023-07-20	4	11	55869	24284	31585	8529.5	6306	2223.5	0.127595	0.843542	0.0692063	0.827651	0.0583891	0.0158909	574.266	272.736	93	67	1.3	95	16385.6	86	76	56	31	0	1.8	9.7	7.5	7.4	2.9	1.3	1.3	2.6	1.3	1.6	1	126	401	275	218.254
CC1DCD1DB8	YK2022	81256_2	81309_1	M	LOW FAT	2023-07-03	3	5	NA	NA	NA	NA	NA	NA	0.0430939	0.879319	0.0539144	0.83055	-0.0108205	0.0487681	165.457	251.611	107	102	0.5	75	12275.2	54	75	50	27	0	2.2	10.8	4.6	4.4	2.3	1.2	1.1	2.3	1.1	1.1	0	134	387	253	188.806
CC1DCD1DB9	YK2041	81508_2	81402_1	F	HIGH FAT	2023-07-13	1	6	NA	NA	NA	NA	NA	NA	0.0863333	0.807061	0.0752846	0.80748	0.0110488	-0.000419069	207.667	168.153	57	59	0.266667	85	13495.6	84	89	60	37	0	1.7	5.8	3	2.8	1.2	0.8	0.7	1.5	0.8	1.4	0	100	229	129	129
CC1DCD1DBA	YK1976	80851_2	81258_1	M	LOW FAT	2023-06-09	4	10	NA	NA	NA	NA	NA	NA	0.141989	0.793486	0.0871084	0.798675	0.0548808	-0.00518904	630.567	345.281	95	86	2	95	15162.9	98	124	54	39	0	1.9	13	10.2	11.4	4.4	1.3	1.2	2.5	1.2	1.7	3	108	391	283	262.037
CC1DCD1DBB	YK2030	80890_2	80879_1	M	HIGH FAT	2023-07-09	5	6	NA	NA	NA	NA	NA	NA	0.197277	0.750996	0.0719892	0.835269	0.125288	-0.0842728	817.14	200.911	87	72	3.5	105	15553.6	102	152	54	35	0	2.1	12.7	16.6	13.2	3.3	1.3	1.4	2.7	1.2	1.2	3	142	433	291	204.93
CC1DCD1DBC	YK2050	81438_2	81613_1	M	HIGH FAT	2023-07-19	1	10	55811	19695	36116	8569	6385.33	2183.67	0.149882	0.810779	0.0648936	0.81617	0.084988	-0.00539112	730.492	257.199	61	54	1.4	100	17082.5	106	103	62	45	0	1.8	7.8	9.9	6	3.2	1.3	1.2	2.5	1.2	1.4	1	112	358	246	219.643
CC1DCD1DBD	YK1981	80876_2	80908_1	F	LOW FAT	2023-06-10	5	5	NA	NA	NA	NA	NA	NA	0.0566337	0.848779	0.0809283	0.804135	-0.0242946	0.0446439	78.9364	169.892	64	79	0.25	77	16900.3	64	95	43	26	0	1.7	6.6	2.2	3.6	1.6	0.8	0.8	1.6	0.9	0.9	0	94	210	116	123.404
CC1DCD1DBE	YK2060	81156_2	81317_1	M	LOW FAT	2023-07-25	4	15	NA	NA	NA	NA	NA	NA	0.152539	0.775373	0.0377778	0.842559	0.114761	-0.0671864	1286.72	216.049	95	89	2.3	82	12155	107	164	182	186	0	1.8	10.2	7.7	4.7	NA	1.1	1.1	2.2	NA	NA	2	118	350	232	196.61
CC1DCD1DBF	YK2073	80982_1	80887_1	F	HIGH FAT	2023-08-02	6	11	NA	NA	NA	NA	NA	NA	0.101841	0.831716	0.058876	0.76845	0.0429648	0.0632668	439.039	237.284	92	75	0.233333	83	13451.4	63	53	77	52	0	1.8	6.3	4.1	7.1	3	0.9	0.9	1.8	1	0.9	0	103	273	170	165.049
CC1DCD1DC0	YK1985	80918_2	80910_1	F	LOW FAT	2023-06-13	5	9	53424	23575	29849	7208.5	6380	828.5	0.126748	0.781206	0.0786139	0.808317	0.0481341	-0.0271109	292.695	135.395	91	153	0.533333	71	11838.5	54	62	45	15	0	1.9	7.2	2.8	3.7	2.9	1	1	2	1	1.7	0	110	269	159	144.545
CC1DCD1DC1	YK2042	81592_2	81628_1	M	HIGH FAT	2023-07-17	1	12	33254	10192	23062	4402.5	4314	88.5	0.188596	0.77293	0.0586364	0.821182	0.129959	-0.048252	1107.6	253.393	105	75	1.8	117	17683.6	74	120	46	32	0	2	11.7	15.5	8.7	5.1	1.3	1.4	2.7	1.2	1.6	1	130	429	299	230
CC1DCD1DC2	YK2024	80919_2	80891_1	M	LOW FAT	2023-07-03	5	6	54022	14080	39942	7570.5	6928.33	642.167	0.165476	0.774954	0.0718548	0.828226	0.0936214	-0.0532716	576.019	174.667	108	102	2	84	14187.8	66	123	67	44	0	2	5.4	9.2	8.1	4.7	1.2	1.1	2.3	1.1	1.6	2	148	390	242	163.514
CC1DCD1DC3	YK2012	81437_1	81256_1	M	LOW FAT	2023-06-28	2	7	NA	NA	NA	NA	NA	NA	0.121597	0.813923	0.0711974	0.843625	0.0503996	-0.0297018	415.682	191.311	65	71	0.4	65	12454.5	69	NA	80	40	NA	2	8	5.2	4.4	2.6	1.1	1.1	2.2	1.2	1.2	0	125	325	200	160
CC1DCD1DC4	YK1984	80918_2	80910_1	M	HIGH FAT	2023-06-13	5	9	39244	12264	26980	6579	4601.67	1977.33	0.239301	0.71457	0.0474837	0.835817	0.191817	-0.121247	2044.32	263.767	104	83	2.2	107	17616.5	79	148	63	36	0	1.9	11.3	17.3	11.8	7.8	1.4	1.3	2.7	1.5	1.5	2	127	470	343	270.079
CC1DCD1DC5	YK2017	80967_2	80914_1	F	HIGH FAT	2023-06-30	5	11	NA	NA	NA	NA	NA	NA	0.0593063	0.849729	0.0806513	0.816322	-0.0213451	0.0334074	66.5083	135.704	59	54	0.266667	78	13270.3	55	48	67	28	0	1.9	5.5	1.1	2.8	0.7	0.8	0.8	1.6	0.9	1.1	0	100	199	99	99
CC1DCD1DC6	YK1995	80945_2	80885_1	F	LOW FAT	2023-06-18	5	4	NA	NA	NA	NA	NA	NA	0.0343333	0.8621	0.0604805	0.828288	-0.0261471	0.0338117	2.28401	87.5353	62	72	0.666667	84	14612.9	88	64	66	29	0	1.8	5.8	0.8	1.8	1.1	0.6	0.7	1.3	0.9	0.8	0	120	208	88	73.3333
CC1DCD1DC7	YK2037	80920_2	80889_1	F	HIGH FAT	2023-07-12	4	6	NA	NA	NA	NA	NA	NA	0.0844186	0.824992	0.0636806	0.830833	0.020738	-0.00584109	196.892	122.384	70	65	0.166667	84	14305.6	84	51	79	34	0	1.9	5.6	2.6	3.7	1.9	0.8	0.8	1.6	0.9	0.9	0	111	220	109	98.1982
CC1DCD1DC8	YK1989	80948_2	81154_1	F	HIGH FAT	2023-06-16	5	3	85189	41510	43679	16399.5	7480.33	8919.17	0.0521212	0.853455	0.0574262	0.837553	-0.00530495	0.0159018	152.755	183.768	70	62	0.27	86	14223.1	112	53	125	72	0	1.9	6.4	2	2.2	1.2	1	0.9	1.9	1.1	0.8	0	100	243	143	143
CC1DCD1DC9	YK2008	80852_2	80924_1	M	HIGH FAT	2023-06-26	5	12	37148	13456	23692	5970.5	4297.67	1672.83	0.150385	0.781278	0.050813	0.851111	0.0995719	-0.0698335	879.307	203.745	105	89	0.8	87	10866	56	46	64	38	0	2	10.9	8.7	9.3	4	1.3	1.3	2.6	1	1.4	2	146	435	289	197.945
CC1DCD1DCA	YK2023	81256_2	81309_1	F	HIGH FAT	2023-07-03	3	5	NA	NA	NA	NA	NA	NA	0.084664	0.833239	0.0530033	0.836832	0.0316607	-0.00359244	292.217	144.49	61	57	0.8	68	13466	93	101	59	34	0	1.8	6.3	3.9	6.4	2.5	0.7	0.8	1.5	1.1	1.4	0	121	254	133	109.917
CC1DCD1DCB	YK2058	80967_2	80914_1	M	LOW FAT	2023-07-26	6	14	NA	NA	NA	NA	NA	NA	0.11892	0.798328	0.0633333	0.830794	0.0555867	-0.0324655	617.544	267.21	96	71	0.4	98	14367.1	NA	NA	NA	NA	NA	2	9.3	6.4	6.9	NA	1.1	1.1	2.2	NA	NA	0	100	325	225	225
CC1DCD1DCC	YK1996	80910_2	80886_1	M	HIGH FAT	2023-06-20	5	9	NA	NA	NA	NA	NA	NA	0.161839	0.768576	0.0692835	0.82433	0.0925556	-0.0557537	723.022	228.506	87	79	0.5	91	17810.5	59	84	99	48	0	2	10.4	9.8	9.9	4.1	1.3	1.2	2.5	1.2	1.5	1	125	384	259	207.2
CC1DCD1DCD	YK2009	80852_2	80924_1	F	LOW FAT	2023-06-26	5	12	NA	NA	NA	NA	NA	NA	0.0477121	0.846136	0.0641742	0.825135	-0.0164621	0.0210012	47.3561	103.243	80	79	0.15	83	13405.7	NA	NA	NA	NA	NA	2	5.2	2.8	1.5	1	1	1	2	1	0.7	0	125	221	96	76.8
CC1DCD1DCE	YK2035	81308_1	81255_1	F	HIGH FAT	2023-07-11	4	10	NA	NA	NA	NA	NA	NA	0.168748	0.759361	0.0548421	0.834772	0.113906	-0.0754105	745.361	149.918	66	67	0.7	106	17103.8	NA	NA	NA	NA	NA	1.8	7.6	7.1	7.7	4.5	0.8	0.9	1.7	1.5	0.8	0	112	279	167	149.107
CC1DCD1DCF	YK2056	81418_2	81630_1	M	HIGH FAT	2023-07-23	1	13	NA	NA	NA	NA	NA	NA	0.129717	0.815367	0.0477236	0.848509	0.0819931	-0.0331428	783.93	212.501	92	83	1.3	89	14668.4	99	112	64	46	0	1.9	11	12.6	6.5	NA	NA	1.9	NA	NA	NA	3	139	417	278	200
CC1DCD1DD0	YK2025	80919_2	80891_1	F	HIGH FAT	2023-07-03	5	6	NA	NA	NA	NA	NA	NA	0.0326599	0.86931	0.0668868	0.820975	-0.0342269	0.0483349	-8.79173	97.7899	62	59	0.1	70	14522.9	50	61	72	35	0	2	5.4	1.5	1.7	1.5	0.8	0.8	1.6	0.8	0.6	0	115	207	92	80
CC1DCD1DD1	YK1978	81364_1	81254_1	M	HIGH FAT	2023-06-09	1	6	NA	NA	NA	NA	NA	NA	0.224326	0.716057	0.090297	0.801056	0.134029	-0.0849994	1056.07	315.969	116	98	2.9	92	18201.8	108	105	64	35	0	2	15.6	23.4	13.8	8.9	1.3	1.2	2.5	1.4	2	NA	120	494	374	311.667
CC1DCD1DD2	YK2003	81317_2	81156_1	F	LOW FAT	2023-06-22	3	8	NA	NA	NA	NA	NA	NA	0.134825	0.755921	0.0762199	0.799931	0.0586055	-0.0440106	282.958	104.584	69	62	0.333333	80	15078	61	93	47	22	0	1.8	6.2	3.3	6.4	1.7	0.6	0.6	1.2	0.8	0.5	0	114	209	95	83.3333
CC1DCD1DD3	YK2016	80967_2	80914_1	M	LOW FAT	2023-06-30	5	11	NA	NA	NA	NA	NA	NA	0.166238	0.759415	0.0675532	0.805638	0.0986846	-0.0462231	795.328	242.955	86	74	0.4	90	15672.7	72	111	67	37	0	2	9.1	9.5	7.2	3.9	1.1	1.1	2.2	1.2	1.2	2	115	346	231	200.87
CC1DCD1DD4	YK2001	80932_2	80904_1	F	HIGH FAT	2023-06-21	5	4	NA	NA	NA	NA	NA	NA	0.113059	0.807531	0.102896	0.786296	0.0101634	0.0212346	169.699	152.083	81	72	0.3	66	15461	44	57	64	30	0	1.7	6.8	3	8.3	2.2	0.9	0.9	1.8	0.9	1.1	0	115	242	127	110.435
CC1DCD1DD5	YK1987	81154_2	80922_1	F	HIGH FAT	2023-06-15	4	4	68671	24032	44639	9859.5	8933.67	925.833	0.0892385	0.813851	0.0725926	0.809428	0.0166459	0.00442297	188.08	135.624	72	71	0.166667	91	14051	82	55	92	65	0	1.8	9	3.6	4.3	1.8	0.9	0.9	1.8	1.2	1	3	118	266	148	125.424
CC1DCD1DD6	YK2072	80982_1	80887_1	M	LOW FAT	2023-08-02	6	11	45975	14270	31705	6931.5	5348	1583.5	0.0541095	0.883851	0.0391209	0.853993	0.0149886	0.0298581	409.176	281.003	108	115	1.1	94	13197.4	NA	NA	NA	NA	NA	2.1	10.1	5.1	4.6	3.9	1.3	1.3	2.6	1.4	1.2	0	108	378	270	250
CC1DCD1DD7	YK1974	81255_2	81307_1	M	LOW FAT	2023-06-08	3	10	NA	NA	NA	NA	NA	NA	0.11923	0.812563	0.0583175	0.839651	0.0609121	-0.0270879	700.272	278.801	119	103	0.3	107	16535.9	90	114	59	33	0	2.1	11.3	10.6	8.4	4.6	1.2	1.2	2.4	1.4	1.9	3	130	419	289	222.308
CC1DCD1DD8	YK1991	80848_2	80854_1	F	HIGH FAT	2023-06-16	5	8	NA	NA	NA	NA	NA	NA	0.026966	0.892449	0.0518992	0.842132	-0.0249332	0.0503172	48.0209	201.905	62	74	NA	89	16316.1	62	44	83	43	0	1.9	7.9	1.2	2.9	1.4	0.9	0.9	1.8	1.2	0.7	2	104	260	156	150
CC1DCD1DD9	YK2031	80890_2	80879_1	F	LOW FAT	2023-07-09	5	6	NA	NA	NA	NA	NA	NA	0.0607051	0.85649	0.0659587	0.749174	-0.00525357	0.107316	69.4097	110.438	72	83	0.133333	73	12123	55	76	67	38	0	2	5.7	2.1	3.1	1.7	1	0.9	1.9	1	1	1	114	213	99	86.8421
CC1DCD1DDA	YK1986	81154_2	80922_1	M	LOW FAT	2023-06-15	4	4	37500	11565	25935	5554	4501.33	1052.67	0.193579	0.748504	0.0789506	0.826698	0.114628	-0.0781931	917.084	275.58	134	102	3	122	22356.5	173	112	686	296	0	2	16.8	22	10.9	6.5	1.5	1.4	2.9	1.4	2.1	3	134	477	343	255.97
CC1DCD1DDB	YK1977	80851_2	81258_1	F	HIGH FAT	2023-06-09	4	10	NA	NA	NA	NA	NA	NA	0.0889083	0.750335	0.0791026	0.768141	0.00980573	-0.0178062	394.976	330.176	59	61	0.3	88	14110.5	64	81	57	48	0	1.8	5.6	2.4	3.4	1.8	0.6	0.7	1.3	0.9	0.5	0	75	211	136	181.333
CC1DCD1DDC	YK2046	81492_2	81418_1	M	LOW FAT	2023-07-18	1	9	NA	NA	NA	NA	NA	NA	0.109784	0.855118	0.0683333	0.846868	0.041451	0.00824983	370.9	195.959	88	79	1	91	17817.5	81	123	52	28	0	1.8	9.7	7.9	5.1	4.8	1	1.1	2.1	1.3	1.2	1	136	350	214	157.353
CC1DCD1DDD	YK2026	81379_1	81252_1	M	HIGH FAT	2023-07-03	3	12	NA	NA	NA	NA	NA	NA	0.13293	0.805877	0.0543333	0.855306	0.0785965	-0.0494284	674.744	198.366	85	86	0.5	76	14165.5	96	69	59	35	0	2	10.2	10.2	6.8	3.6	1.3	1.3	2.6	1.6	1.6	2	138	392	254	184.058
CC1DCD1DDE	YK2043	81592_2	81628_1	F	LOW FAT	2023-07-17	1	12	NA	NA	NA	NA	NA	NA	0.07625	0.861955	0.0530851	0.823085	0.0231649	0.03887	217.836	131.726	62	63	0.166667	84	12693	63	62	58	21	0	1.8	6.7	2.8	3.5	1.7	0.7	0.7	1.4	0.9	0.9	1	111	213	102	91.8919
CC1DCD1DDF	YK2053	81252_2	81263_1	F	LOW FAT	2023-07-20	4	11	NA	NA	NA	NA	NA	NA	0.0298446	0.907893	0.0694815	0.838296	-0.0396369	0.0695966	-7.88913	132.248	79	69	0.133333	69	13577.8	NA	NA	NA	NA	NA	2	5.7	1.2	2.3	0.8	0.7	0.7	1.4	0.9	1.1	1	105	199	94	89.5238
CC1DCD1DE0	YK2063	81432_2	81419_1	F	HIGH FAT	2023-07-26	1	9	NA	NA	NA	NA	NA	NA	0.155802	0.757978	0.0870103	0.819485	0.0687922	-0.0615061	298.736	105.967	52	44	1.2	103	13360.6	61	85	81	48	0	1.6	5.7	3.1	2.6	NA	0.7	0.7	1.4	NA	NA	1	111	210	99	89.1892
CC1DCD1DE1	YK2064	81628_2	81460_1	M	LOW FAT	2023-07-26	1	4	NA	NA	NA	NA	NA	NA	0.0736806	0.867873	0.0677971	0.825652	0.00588345	0.0422211	262.89	250.988	113	92	0.9	86	13400.6	91	91	43	26	0	2.1	11	7	5.5	NA	1.3	1.3	2.6	NA	NA	2	132	402	270	204.545
CC1DCD1DE2	YK2015	81156_2	81317_1	F	HIGH FAT	2023-06-30	3	9	NA	NA	NA	NA	NA	NA	0.0902273	0.818333	0.0640562	0.839799	0.026171	-0.0214659	273.354	158.285	73	75	0.733333	90	15003.1	63	55	55	24	0	1.7	6.9	2.7	5.4	2.1	0.9	1	1.9	1	1.3	0	99	225	126	127.273
CC1DCD1DE3	YK1979	81364_1	81254_1	F	LOW FAT	2023-06-09	1	6	NA	NA	NA	NA	NA	NA	0.0668403	0.83401	0.096037	0.812444	-0.0291968	0.021566	48.4767	118.996	64	81	0.15	72	14312.8	60	68	52	24	0	1.9	5.4	2.3	4.6	1.1	0.7	0.7	1.4	0.9	1.2	0	100	198	98	98
CC1DCD1DE4	YK1992	80891_2	80920_1	M	LOW FAT	2023-06-16	5	8	NA	NA	NA	NA	NA	NA	0.0674113	0.854557	0.0590236	0.834646	0.00838778	0.0199103	333.771	288.858	103	103	0.579	86	14742.8	63	64	60	28	0	2.1	11.1	6.6	5.1	1.7	1.4	1.3	2.7	1.2	1.6	2	120	403	283	235.833
CC1DCD1DE5	YK2070	81472_2	81461_1	M	LOW FAT	2023-08-02	2	12	43794	15399	28395	6045.5	5149.33	896.167	0.12205	0.79824	0.0665248	0.854752	0.0555249	-0.0565116	528.465	219.905	96	94	0.8	82	13002.1	NA	NA	NA	NA	NA	2	9.6	7.3	6.1	2.5	1.3	1.3	2.6	1.2	1.8	2	119	341	222	186.555
CC1DCD1DE6	YK1990	80848_2	80854_1	M	LOW FAT	2023-06-16	5	8	32630	11979	20651	4698.5	3789	909.5	0.105205	0.812457	0.0514236	0.859861	0.0537819	-0.0474045	677.853	259.247	119	101	1.2	100	14795.4	88	72	50	35	0	2.1	13.3	5.7	5.5	2.3	1.4	1.4	2.8	1.4	1.9	0	126	383	257	203.968
CC1DCD1DE7	YK2019	81257_2	81362_1	F	LOW FAT	2023-07-03	3	10	54891	26840	28051	7615	7010.67	604.333	0.0712033	0.84	0.0610692	0.81522	0.0101341	0.0247799	165.088	134.269	74	91	0.4	56	12213.5	NA	NA	NA	NA	NA	1.8	7.6	2.8	5.2	2.5	0.9	0.8	1.7	1	1.5	0	123	265	142	115.447
CC1DCD1DE8	YK2020	80850_2	80945_1	M	HIGH FAT	2023-07-03	4	8	NA	NA	NA	NA	NA	NA	0.169521	0.772781	0.0426455	0.861534	0.126876	-0.0887539	1174.57	187.604	78	65	0.3	87	17465.8	65	69	63	31	0	1.9	10.6	12.3	12.3	4.4	1.3	1.2	2.5	1.3	1.3	3	148	405	257	173.649
CC1DCD1DE9	YK1994	80945_2	80885_1	M	HIGH FAT	2023-06-18	5	4	NA	NA	NA	NA	NA	NA	0.176675	0.761333	0.0766667	0.830199	0.100008	-0.0688657	587.897	173.746	89	71	1.1	94	14203.4	82	105	51	41	0	2.1	10.6	12.1	10.6	5.8	1.3	1.4	2.7	1.5	1.5	0	152	402	250	164.474
CC1DCD1DEA	YK1973	80919_2	80891_1	F	LOW FAT	2023-06-06	4	8	NA	NA	NA	NA	NA	NA	0.109146	0.799404	0.0835514	0.800343	0.0255949	-0.000938885	200.336	129.637	93	81	0.633333	80	15371	70	67	48	23	0	1.9	7.1	3.6	3.9	2.4	1	0.9	1.9	0.9	1	3	121	251	130	107.438
CC1DCD1DEB	YK2007	80917_2	81013_1	F	LOW FAT	2023-06-26	5	12	NA	NA	NA	NA	NA	NA	0.0713754	0.813172	0.0550779	0.743084	0.0162975	0.0700874	149.491	110.682	80	83	NA	86	14965.4	68	65	70	34	0	1.8	5.6	2	3.2	1.5	0.8	0.9	1.7	1	0.7	3	107	206	99	92.5234
CC1DCD1DEC	YK1999	80922_2	81074_1	F	HIGH FAT	2023-06-20	5	6	NA	NA	NA	NA	NA	NA	0.0596716	0.857258	0.0586	0.832	0.00107159	0.0252578	106.712	109.163	47	65	0.3	97	17162.8	40	59	70	56	0	1.8	5.1	1.3	2.1	0.8	0.7	0.7	1.4	0.8	1.1	0	114	204	90	78.9474
CC1DCD1DED	YK2137	81425_2	81405_1	F	HIGH FAT	2023-09-06	3	15	NA	NA	NA	NA	NA	NA	0.0690865	0.839119	0.0759921	0.808929	-0.00690553	0.03019	125.117	156.86	59	46	0.2125	97	14643.1	82	48	64	45	0	1.8	6	2.3	3.9	1.9	0.8	0.8	1.6	1.1	0.9	2	98	214	116	118.367
CC1DCD1DEE	YK2076	81460_2	81422_1	M	HIGH FAT	2023-08-03	2	9	NA	NA	NA	NA	NA	NA	0.121286	0.810362	0.0444086	0.868889	0.0768771	-0.058527	927.845	250.994	92	69	2	90	16377.6	88	115	45	47	0	1.8	8.6	8.6	8.5	3.8	1.1	1	2.1	1.1	0.9	3	114	362	248	217.544
CC1DCD1DEF	YK2146	81420_2	81492_1	M	HIGH FAT	2023-09-12	3	7	38015	17402	20613	4990.5	4858.67	131.833	0.13062	0.81254	0.0593113	0.836088	0.0713085	-0.0235485	702.647	254.198	101	81	2.4	98	20669	88	89	54	39	0	2	11.8	9.6	13.9	4.4	1.5	1.5	3	1.3	1.7	0	142	468	326	229.577
CC1DCD1DF1	YK2102	81678_2	81508_1	M	HIGH FAT	2023-08-20	2	10	NA	NA	NA	NA	NA	NA	0.195722	0.748127	0.0583471	0.824628	0.137375	-0.0765011	1064.35	214.906	85	85	1.1	93	15403.6	110	163	66	54	0	1.8	12.5	15.5	11.3	6.4	1.2	1.1	2.3	1.1	1.6	1	145	484	339	233.793
CC1DCD1DF2	YK2130	81423_2	81472_1	M	LOW FAT	2023-09-05	3	2	NA	NA	NA	NA	NA	NA	0.107489	0.820422	0.0527778	0.836905	0.0547117	-0.0164828	666.165	268.781	114	94	NA	89	13977.1	46	68	51	31	0	1.9	1.8	4.6	4.9	3.2	1.4	1.4	2.8	1.2	1.8	0	101	323	222	219.802
CC1DCD1DF4	YK2122	81679_2	81703_1	M	HIGH FAT	2023-08-29	2	13	NA	NA	NA	NA	NA	NA	0.187857	0.760119	0.0583333	0.855575	0.129524	-0.0954557	1143.74	243.118	95	84	1.6	108	19311.5	68	71	58	39	0	1.9	10.7	17	13.9	5.9	1.2	1	2.2	1.2	1.8	3	133	454	321	241.353
CC1DCD1DF5	YK2082	81560_2	81678_1	M	LOW FAT	2023-08-08	1	8	NA	NA	NA	NA	NA	NA	0.135948	0.795222	0.0810435	0.822435	0.0549045	-0.0272131	535.98	266.586	118	100	1.5	86	14751.3	71	148	53	25	0	2	12.9	7.6	7.6	3.5	1.4	1.4	2.8	1.8	1.8	2	136	443	307	225.735
CC1DCD1DF6	YK2119	81508_2	81402_1	F	HIGH FAT	2023-08-28	3	13	NA	NA	NA	NA	NA	NA	0.150841	0.742898	0.0432	0.842967	0.107641	-0.100069	675.154	95.6463	66	62	0.3	91	14868.3	42	44	70	25	0	1.8	6.1	5.1	7.1	2.3	0.7	0.7	1.4	0.9	0.7	0	116	229	113	97.4138
CC1DCD1DF7	YK2147	81420_2	81492_1	F	LOW FAT	2023-09-12	3	7	NA	NA	NA	NA	NA	NA	0.0659214	0.863496	0.0483754	0.811289	0.0175461	0.0522074	181.702	120.026	83	87	0.4	88	16871	57	49	65	29	0	1.8	6.4	2.1	3.9	1.7	0.8	0.7	1.5	0.9	1	0	132	249	117	88.6364
CC1DCD1DF8	YK2088	81401_2	81591_1	M	LOW FAT	2023-08-09	2	8	NA	NA	NA	NA	NA	NA	0.111033	0.808197	0.083	0.8161	0.0280329	-0.00790282	374.9	251.562	123	104	1	92	15627.6	63	65	46	26	0	2.1	9	7.8	3.7	4.6	1.1	1.1	2.2	1	1.2	1	125	357	232	185.6
CC1DCD1DF9	YK2129	81419_2	81444_1	F	LOW FAT	2023-09-03	3	11	NA	NA	NA	NA	NA	NA	0.0811635	0.830755	0.0733631	0.827589	0.00780043	0.00316543	109.412	90.0097	86	85	0.133333	66	14605.6	58	62	63	30	0	1.9	6.6	2	4.3	1.9	0.9	0.9	1.8	0.8	1.3	0	127	214	87	68.5039
CC1DCD1DFB	YK2095	81559_2	81425_1	F	HIGH FAT	2023-08-13	2	10	43162	17509	25653	5464	5314	150	0.0464706	0.854525	0.036821	0.845864	0.0096496	0.00866069	158.256	106.725	65	64	NA	95	16405.8	67	46	65	45	0	2	7.2	1.4	3.9	1.6	1.2	1.1	2.3	1.2	1.4	0	122	241	119	97.541
CC1DCD1DFD	YK2068	81679_2	81703_1	M	HIGH FAT	2023-08-04	1	7	NA	NA	NA	NA	NA	NA	0.279691	0.67464	0.0829132	0.825434	0.196777	-0.150794	1396.72	262.641	123	92	2.5	99	21120.2	107	154	67	36	0	1.9	14.4	29.3	21.5	14.2	1.3	1.3	2.6	1.6	1.9	3	144	553	409	284.028
CC1DCD1DFE	YK2125	81704_1	81714_1	F	LOW FAT	2023-08-30	1	7	52041	19642	32399	6620	6810.33	-190.333	0.0863105	0.82208	0.0638542	0.828021	0.0224564	-0.00594106	229.473	142.001	84	86	0.8	87	12378.3	NA	NA	NA	NA	NA	2	6.9	2.5	6.1	2.6	0.8	0.8	1.6	0.9	1.4	1	113	254	141	124.779
CC1DCD1E00	YK2136	81425_2	81405_1	M	LOW FAT	2023-09-06	3	15	NA	NA	NA	NA	NA	NA	0.0955493	0.834926	0.068902	0.805765	0.0266474	0.0291608	484.064	336.419	99	90	1.5	99	15575.2	79	131	52	41	0	2	13.2	6.4	7	4.1	1.6	1.5	3.1	1.3	1.8	2	100	371	271	271
CC1DCD1E01	YK2067	80853_2	80882_1	F	LOW FAT	2023-08-03	6	6	40592	17733	22859	6352	4696	1656	0.131111	0.792831	0.0764261	0.81811	0.054685	-0.0252793	345.683	151.766	89	81	0.95	93	13143.7	74	106	50	27	0	1.9	7.7	3.7	7.7	2.9	1	1	2	1.2	1.9	1	113	273	160	141.593
CC1DCD1E02	YK2085	81700_2	81687_1	F	HIGH FAT	2023-08-09	1	7	NA	NA	NA	NA	NA	NA	0.216778	0.702578	0.0687534	0.796802	0.148024	-0.0942244	669.019	115.06	97	79	0.366667	105	15461.8	51	57	86	44	0	2.3	6.4	6.7	11	4.9	1	1	2	1.2	1.3	0	135	295	160	118.519
CC1DCD1E03	YK2133	81794_2	81713_1	F	HIGH FAT	2023-09-04	2	7	NA	NA	NA	NA	NA	NA	0.128894	0.776903	0.0981443	0.786735	0.0307495	-0.00983274	205.987	130.078	65	71	0.1	86	15003.3	77	66	81	38	0	1.8	6.8	5.8	7.3	2.9	0.8	0.8	1.6	0.9	0.8	0	108	238	130	120.37
CC1DCD1E05	YK2104	81432_2	81419_1	M	HIGH FAT	2023-08-21	2	11	NA	NA	NA	NA	NA	NA	0.216919	0.726623	0.0761494	0.829368	0.14077	-0.102744	1034.53	248.936	99	79	2.6	104	19146.8	81	115	58	55	0	1.8	14.5	19.2	11.3	8.9	1.8	1.7	3.5	2.4	2.3	3	142	442	300	211.268
CC1DCD1E06	YK2149	81402_2	81679_1	F	LOW FAT	2023-09-15	3	10	NA	NA	NA	NA	NA	NA	0.0519597	0.845147	0.0516456	0.831435	0.000314137	0.0137119	131.781	134.179	65	77	0.173333	65	11402.6	73	68	62	37	0	1.8	5.6	1.9	2.8	1.2	0.7	0.7	1.4	0.8	1	1	96	186	90	93.75
CC1DCD1E07	YK2128	81419_2	81444_1	M	HIGH FAT	2023-09-03	3	11	NA	NA	NA	NA	NA	NA	0.16754	0.775865	0.0675	0.82875	0.10004	-0.0528846	760.453	224.545	97	94	2.4	92	16828.6	88	165	54	57	0	2.1	11.1	16.8	13.4	6.4	1.4	1.3	2.7	1.1	1.8	1	143	428	285	199.301
CC1DCD1E08	YK2093	81459_2	81559_1	F	LOW FAT	2023-08-13	2	12	NA	NA	NA	NA	NA	NA	0.164568	0.749137	0.071195	0.813208	0.0933734	-0.0640708	447.35	118.136	107	78	0.55	75	15101.2	84	85	55	23	0	2	6.3	4.8	7.7	3.3	0.8	0.8	1.6	1.1	1.1	0	119	245	126	105.882
CC1DCD1E09	YK2118	81508_2	81402_1	M	LOW FAT	2023-08-28	3	13	NA	NA	NA	NA	NA	NA	0.135309	0.78615	0.0621296	0.831944	0.0731797	-0.0457949	627.968	215.86	96	91	1	107	16340.2	119	174	65	43	0	1.7	11.6	7.7	6.5	3.3	1.1	1.2	2.3	1.3	1.7	3	130	407	277	213.077
CC1DCD1E0A	YK2114	81479_1	81463_1	M	HIGH FAT	2023-08-27	3	14	52943	18233	34710	7743	6238	1505	0.178889	0.7566	0.05125	0.842019	0.127639	-0.0854196	1067.98	200.67	81	76	0.7	118	16212.6	93	67	46	41	0	1.9	10.3	12.2	7.8	5.7	1.1	1.1	2.2	1.2	1.2	3	118	372	254	215.254
CC1DCD1E0B	YK2097	81405_2	81533_1	F	HIGH FAT	2023-08-14	2	12	49100	20680	28420	7537.5	5908	1629.5	0.177083	0.738792	0.0782749	0.809415	0.0988085	-0.0706235	376.279	92.1574	72	59	0.4	82	14906	91	61	164	107	0	2.1	7.3	4.5	9.4	3.4	1	1	2	1	1.5	0	130	258	128	98.4615
CC1DCD1E0D	YK2113	81591_2	81401_1	F	HIGH FAT	2023-08-26	2	12	NA	NA	NA	NA	NA	NA	0.0698167	0.831083	0.0669198	0.806835	0.00289684	0.0242479	164.124	160.773	70	69	0.133333	82	14088	41	120	54	29	0	1.7	5.3	1.8	5	1	0.9	1	1.9	0.9	1.1	0	94	205	111	118.085
CC1DCD1E0E	YK2131	81423_2	81472_1	F	HIGH FAT	2023-09-05	3	2	NA	NA	NA	NA	NA	NA	0.0654333	0.835517	0.0761382	0.807764	-0.0107049	0.0277524	109.61	152.282	54	66	0.1	79	13832.9	61	88	62	42	0	1.9	6.9	2.8	3.9	1.4	0.8	0.8	1.6	0.9	0.8	1	96	214	118	122.917
CC1DCD1E0F	YK2124	81704_1	81714_1	M	HIGH FAT	2023-08-30	1	7	NA	NA	NA	NA	NA	NA	0.140578	0.786335	0.0783819	0.82534	0.0621958	-0.0390046	512.923	225.597	79	80	NA	89	18537.6	NA	NA	NA	NA	NA	2.2	9.6	12.8	6	3.6	1.3	1.4	2.7	1.2	0.8	3	128	373	245	191.406
CC1DCD1E10	YK2108	81210_1	81155_1	M	LOW FAT	2023-08-23	7	11	NA	NA	NA	NA	NA	NA	0.0941243	0.841704	0.0483333	0.852438	0.045791	-0.0107339	538.314	223.65	114	108	1	89	15290.1	53	127	55	39	0	1.9	10.5	7.8	6.6	2.5	1.1	1.1	2.2	1.3	1.4	0	130	369	239	183.846
CC1DCD1E12	YK2100	80887_2	80918_1	M	HIGH FAT	2023-08-15	7	10	33624	12731	20893	4820.5	3965.33	855.167	0.0991709	0.842035	0.0493939	0.839933	0.0497769	0.00210252	707.157	303.027	96	84	1.1	93	16550.8	107	77	68	54	0	2	11.4	7.7	8.2	2.9	1.4	1.4	2.8	1.2	1.7	2	117	442	325	277.778
CC1DCD1E13	YK2144	80917_2	81013_1	M	LOW FAT	2023-09-11	8	14	NA	NA	NA	NA	NA	NA	0.103875	0.831975	0.0535417	0.844208	0.0503331	-0.0122338	661.479	286.812	102	83	0.4	98	17359.6	77	101	54	28	0	1.9	9.9	4.6	4.3	2.7	1	1	2	1.1	0.7	3	98	332	234	238.776
CC1DCD1E14	YK2077	81460_2	81422_1	F	LOW FAT	2023-08-03	2	9	64489	31028	33461	8810.5	8407.67	402.833	0.0469802	0.864092	0.0545349	0.843915	-0.00755469	0.0201777	102.345	140.5	85	79	0.3	87	14027.9	64	46	51	22	0	2	4.7	3.4	2.5	1.2	0.7	0.7	1.4	1.2	1.3	0	96	219	123	128.125
CC1DCD1E16	YK2084	81700_2	81687_1	M	LOW FAT	2023-08-09	1	7	NA	NA	NA	NA	NA	NA	0.103005	0.837457	0.0433079	0.849796	0.0596968	-0.0123395	673.443	220.469	136	122	0.5	112	15778.6	59	74	54	27	0	1.9	13	10	7.3	4.5	1.5	1.4	2.9	1.1	2	0	157	431	274	174.522
CC1DCD1E17	YK2098	81422_2	81558_1	M	HIGH FAT	2023-08-14	2	10	47772	21540	26232	6064.5	6123.67	-59.1667	0.101253	0.829907	0.0599234	0.814866	0.0413292	0.0150409	525.384	276.947	69	64	1.1	92	15199.7	70	73	45	33	0	2.1	8.1	7	6.2	1.7	1.1	1.3	2.4	1.2	1.3	2	104	355	251	241.346
CC1DCD1E18	YK2087	81744_1	81682_1	F	HIGH FAT	2023-08-09	1	11	NA	NA	NA	NA	NA	NA	0.0628936	0.844596	0.0595425	0.811863	0.00335113	0.032733	143.359	139.681	68	61	0.333333	78	11965.9	69	66	57	39	0	1.9	6.7	1.8	3	0.6	0.9	0.9	1.8	1	0.4	0	116	230	114	98.2759
CC1DCD1E19	YK2106	81403_2	81406_1	M	LOW FAT	2023-08-23	3	6	NA	NA	NA	NA	NA	NA	0.0548387	0.87614	0.0347959	0.803197	0.0200428	0.0729425	398.534	245.054	94	98	0.6	93	16159.5	66	62	61	37	0	1.9	8.4	4.1	4.7	2.4	1	1.1	2.1	1.2	0.5	2	112	324	212	189.286
CC1DCD1E1A	YK2081	81739_1	81711_1	F	LOW FAT	2023-08-06	1	7	NA	NA	NA	NA	NA	NA	0.062457	0.853208	0.0671181	0.831979	-0.00466109	0.021229	106.467	127.536	84	89	0.133333	71	14403.1	52	68	66	33	0	1.8	6.8	1.7	4.2	1.8	0.9	0.8	1.7	0.9	1.3	0	108	223	115	106.481
CC1DCD1E1B	YK2139	81401_2	81591_1	F	LOW FAT	2023-09-10	3	7	NA	NA	NA	NA	NA	NA	0.069729	0.859458	0.0677222	0.848444	0.00200678	0.0110136	111.075	107.661	77	89	0.233333	88	12416	72	61	76	25	0	1.9	7.1	2.5	4.2	1.4	0.9	0.8	1.7	1	1.2	1	132	248	116	87.8788
CC1DCD1E1C	YK2116	81473_2	81416_1	M	HIGH FAT	2023-08-28	2	12	35773	12820	22953	5145	4357.67	787.333	0.118056	0.824481	0.0452564	0.871538	0.0727991	-0.047057	802.975	227.464	83	81	0.6	96	18012.8	82	86	55	38	0	1.9	9.7	7.2	7.4	4.3	1.2	1.2	2.4	1.1	1.7	3	105	389	284	270.476
CC1DCD1E1D	YK2075	80933_2	81259_1	F	LOW FAT	2023-08-02	5	11	NA	NA	NA	NA	NA	NA	0.11284	0.794604	0.0752564	0.817724	0.0375836	-0.0231205	221.508	108.36	82	85	0.15	79	12738.2	66	58	54	23	0	2	7.8	2.5	5.9	2.3	0.9	0.9	1.8	1	1.8	1	120	247	127	105.833
CC1DCD1E1E	YK2094	81559_2	81425_1	M	LOW FAT	2023-08-13	2	10	NA	NA	NA	NA	NA	NA	0.0830242	0.838686	0.0633898	0.826751	0.0196343	0.0119346	282.932	196.593	107	74	1	93	14277.5	58	84	60	29	0	2.1	11	5.2	5.7	1.8	1.1	1.1	2.2	1.1	1.3	1	138	352	214	155.072
CC1DCD1E1F	YK2111	81417_2	81420_1	F	HIGH FAT	2023-08-25	3	10	NA	NA	NA	NA	NA	NA	0.0725631	0.845206	0.0841497	0.809592	-0.0115866	0.035614	120.857	167.389	53	71	0.6	104	14876.1	NA	NA	NA	NA	NA	1.7	7.3	3.1	6.7	2.3	1	0.9	1.9	1.1	1.3	1	116	258	142	122.414
CC1DCD1E20	YK2112	81591_2	81401_1	M	LOW FAT	2023-08-26	2	12	NA	NA	NA	NA	NA	NA	0.0939687	0.842367	0.0659387	0.811111	0.02803	0.0312562	527.368	357.194	115	109	0.6	86	13625.5	48	48	60	55	0	2.1	16.7	6.7	4.9	2.2	1.4	1.4	2.8	1.3	1.1	3	114	397	283	248.246
CC1DCD1E21	YK2086	81744_1	81682_1	M	LOW FAT	2023-08-09	1	11	NA	NA	NA	NA	NA	NA	0.083493	0.843263	0.0722756	0.837372	0.0112174	0.00589168	270.998	223.413	112	101	0.8	84	13122.3	91	81	54	42	0	1.8	10.9	4.9	4.9	2.5	1.2	1.2	2.4	1	1.4	0	124	339	215	173.387
CC1DCD1E22	YK2117	81473_2	81416_1	F	LOW FAT	2023-08-28	2	12	51405	17384	34021	8016.5	5938	2078.5	0.104476	0.815302	0.0601389	0.845556	0.0443373	-0.030254	280.023	110.923	86	76	0.3	87	13390.5	71	89	64	36	0	1.7	6.5	1.8	5	1.9	0.8	0.8	1.6	1	1	0	96	222	126	131.25
CC1DCD1E23	YK2141	81613_2	81424_1	F	LOW FAT	2023-09-10	2	9	NA	NA	NA	NA	NA	NA	0.0365452	0.877679	0.0497508	0.830561	-0.0132056	0.0471181	69.5679	143.937	96	95	0.133333	83	12618.5	48	58	52	21	0	1.9	7.6	1.9	2.2	1.4	0.8	0.9	1.7	1.3	1.1	1	118	253	135	114.407
CC1DCD1E24	YK2123	81679_2	81703_1	F	LOW FAT	2023-08-29	2	13	42839	19801	23038	5276	5272	4	0.178426	0.746232	0.0556289	0.825377	0.122797	-0.079145	828.943	161.851	86	89	1.66667	98	14261.9	94	89	44	28	0	1.7	9	9.3	12.6	5.1	0.9	0.9	1.8	1.1	1.2	1	121	320	199	164.463
CC1DCD1E25	YK2148	81402_2	81679_1	M	HIGH FAT	2023-09-15	3	10	38561	16324	22237	5603.5	4735.67	867.833	0.150186	0.790984	0.0789968	0.824337	0.0711893	-0.0333521	693.691	300.585	98	94	1.1	83	16003.8	87	102	57	41	0	2.2	12.3	14.7	12	5.5	1.4	1.4	2.8	1.3	2	2	128	472	344	268.75
CC1DCD1E26	YK2099	81422_2	81558_1	F	LOW FAT	2023-08-14	2	10	58684	22287	36397	7911	6482.33	1428.67	0.0630159	0.831323	0.0534211	0.820263	0.00959482	0.0110596	193.35	152.037	69	69	0.266667	79	12190.2	57	54	48	22	0	1.8	5.4	1.8	2.4	1.1	0.8	0.7	1.5	1	0.9	0	92	209	117	127.174
CC1DCD1E27	YK2107	81403_2	81406_1	F	HIGH FAT	2023-08-23	3	6	NA	NA	NA	NA	NA	NA	0.165889	0.750254	0.071004	0.799839	0.0948849	-0.0495854	491.12	137.327	66	60	0.766667	91	18078.1	68	52	82	54	0	1.9	6.7	3.7	8.5	5.6	0.8	0.8	1.6	0.7	1.3	0	96	215	119	123.958
CC1DCD1E28	YK2074	80933_2	81259_1	M	HIGH FAT	2023-08-02	5	11	NA	NA	NA	NA	NA	NA	0.155259	0.796674	0.0704762	0.850476	0.0847829	-0.0538025	649.02	218.491	102	81	2	102	18554.4	61	83	48	31	0	2.1	10.6	14.6	11.3	6.3	1.3	1.3	2.6	1.3	1.5	0	172	481	309	179.651
CC1DCD1E29	YK2115	81479_1	81463_1	F	LOW FAT	2023-08-27	3	14	NA	NA	NA	NA	NA	NA	0.055922	0.840337	0.0503158	0.818316	0.0056062	0.0220211	119.944	103.22	73	80	NA	90	13270.3	NA	NA	NA	NA	NA	1.6	6.7	1.1	2.8	1.9	0.8	0.8	1.6	0.8	1.2	0	93	216	123	132.258
CC1DCD1E2A	YK2134	81713_2	81403_1	M	LOW FAT	2023-09-04	2	9	NA	NA	NA	NA	NA	NA	0.186643	0.749969	0.079972	0.828515	0.106671	-0.0785468	733.52	223.284	122	112	4.5	107	14818.6	122	155	44	32	0	2.1	13.4	14.5	13.5	5.9	1.2	1.2	2.4	1.1	1.9	3	105	436	331	315.238
CC1DCD1E2B	YK2079	81425_2	81405_1	F	LOW FAT	2023-08-06	2	13	NA	NA	NA	NA	NA	NA	0.0334811	0.86156	0.0575945	0.816942	-0.0241134	0.0446184	21.6587	120.708	75	78	0.166667	85	13232.9	64	64	72	37	0	1.9	7	1	2.1	1.4	0.9	0.8	1.7	0.8	1.1	1	112	215	103	91.9643
CC1DCD1E2C	YK2132	81794_2	81713_1	M	LOW FAT	2023-09-04	2	7	NA	NA	NA	NA	NA	NA	NA	NA	NA	NA	NA	NA	NA	NA	119	107	0.6	85	15005.8	78	101	60	30	0	2.1	11.7	6.6	5.8	3.8	1.3	1.3	2.6	1.3	1.7	2	128	416	288	225
CC1DCD1E2D	YK2138	81401_2	81591_1	M	HIGH FAT	2023-09-10	3	7	NA	NA	NA	NA	NA	NA	0.150095	0.789416	0.0444248	0.839882	0.10567	-0.0504662	1060.09	222.731	88	73	1.4	92	16858.2	61	49	44	35	0	2	11.8	8.1	9.4	5.2	1.2	1.2	2.4	1.2	1.5	2	128	414	286	223.438
CC1DCD1E2E	YK2089	81401_2	81591_1	F	HIGH FAT	2023-08-09	2	8	NA	NA	NA	NA	NA	NA	0.0475075	0.876547	0.0594239	0.807695	-0.0119164	0.0688511	119.114	197.437	63	70	0.233333	76	13188.2	42	58	72	51	0	1.8	6.1	1.8	3.9	1.6	0.7	0.7	1.4	1	0.6	0	124	231	107	86.2903
CC1DCD1E2F	YK2069	81679_2	81703_1	F	LOW FAT	2023-08-04	1	7	48835	15230	33605	6764.5	5935.67	828.833	0.0781058	0.833801	0.0748366	0.818072	0.00326918	0.0157288	177.293	170.795	92	91	0.2	70	14013.9	67	50	60	32	0	2	7.3	7.6	10.7	2.1	1.1	1.1	2.2	1.1	1.8	0	118	288	170	144.068
CC1DCD1E30	YK2105	81432_2	81419_1	F	LOW FAT	2023-08-21	2	11	NA	NA	NA	NA	NA	NA	0.112794	0.797127	0.0863333	0.798267	0.0264603	-0.00113968	174.363	109.7	74	68	NA	80	11748	60	66	56	31	0	1.9	6	2.8	5.1	1	0.7	0.7	1.4	0.9	1.4	0	120	209	89	74.1667
CC1DCD1E31	YK2121	81472_2	81461_1	F	HIGH FAT	2023-08-29	3	13	NA	NA	NA	NA	NA	NA	0.0952823	0.79388	0.0542857	0.816429	0.0409966	-0.0225488	282.383	111.84	64	50	2.6	84	13675.1	83	111	60	42	0	1.8	4.9	2.3	4.2	1.3	0.7	0.7	1.4	0.9	0.6	0	92	183	91	98.913
CC1DCD1E32	YK2090	81463_2	81592_1	M	HIGH FAT	2023-08-13	2	12	NA	NA	NA	NA	NA	NA	0.0828547	0.849661	0.0335185	0.853025	0.0493361	-0.00336412	776.611	253.231	83	77	0.5	87	14533	54	63	71	48	0	2	8.7	4.3	4.9	2.7	1.1	1.1	2.2	1.3	1.7	2	128	398	270	210.938
CC1DCD1E33	YK2135	81713_2	81403_1	F	HIGH FAT	2023-09-04	2	9	NA	NA	NA	NA	NA	NA	0.115313	0.796608	0.0605442	0.842109	0.0547687	-0.0455004	345.056	121.048	58	47	0.266667	87	15273.3	NA	NA	NA	NA	NA	1.9	5.1	4	4.9	2.5	0.9	0.9	1.8	0.9	1.2	0	116	231	115	99.1379
CC1DCD1E34	YK2103	81678_2	81508_1	F	LOW FAT	2023-08-20	2	10	NA	NA	NA	NA	NA	NA	0.0706667	0.840713	0.0638746	0.834701	0.00679202	0.00601232	103.301	85.0843	76	77	0.139	79	7765.65	NA	NA	NA	NA	NA	1.8	6.5	2.2	2.8	1.8	0.6	0.7	1.3	0.8	0.9	1	127	223	96	75.5906
CC1DCD1E37	YK2140	81613_2	81424_1	M	HIGH FAT	2023-09-10	2	9	NA	NA	NA	NA	NA	NA	0.0851545	0.859593	0.0436434	0.886382	0.0415111	-0.0267889	520.13	208.224	86	72	1.9	103	15680.9	98	92	47	35	0	2.1	11.4	6.7	7.3	3	1.3	1.3	2.6	1.4	1.6	0	151	424	273	180.795
CC1DCD1E38	YK2110	81417_2	81420_1	M	LOW FAT	2023-08-25	3	10	NA	NA	NA	NA	NA	NA	0.144797	0.79471	0.0754167	0.824263	0.0693799	-0.0295523	686.443	294.929	125	136	1.1	104	14743.6	81	132	59	31	0	2.1	13.3	11.9	11.6	6.5	1.3	1.3	2.6	0.9	0.9	1	129	453	324	251.163
CC1DCD1E3B	YK2101	80887_2	80918_1	F	LOW FAT	2023-08-15	7	10	NA	NA	NA	NA	NA	NA	0.0288942	0.860272	0.0605243	0.817378	-0.0316301	0.0428942	11.5718	145.972	83	92	0.266667	78	13615.4	92	52	98	37	0	1.7	6.3	1.4	1.6	1.2	NA	1.4	NA	1	0.9	0	106	213	107	100.943
CC1DCD1E3C	YK2143	81474_2	81433_1	F	HIGH FAT	2023-09-11	3	5	NA	NA	NA	NA	NA	NA	0.105956	0.808279	0.0644638	0.821507	0.0414925	-0.0132286	248.741	108.757	61	64	0.15	84	14636	70	65	70	67	0	1.9	7.4	2.5	5.8	2.7	0.9	0.9	1.8	0.7	1.4	0	132	266	134	101.515
CC1DCD1E3D	YK2080	81739_1	81711_1	M	HIGH FAT	2023-08-06	1	7	NA	NA	NA	NA	NA	NA	0.109675	0.825639	0.0559502	0.850374	0.0537252	-0.0247353	464.254	179.478	71	67	0.3	69	15206.9	78	72	73	35	0	2	8.5	5.8	4.1	3	1.3	1.4	2.7	1.3	1.3	1	123	328	205	166.667
CC1DCD1E3E	YK2096	81405_2	81533_1	M	LOW FAT	2023-08-14	2	12	NA	NA	NA	NA	NA	NA	0.112849	0.827881	0.050599	0.858411	0.0622502	-0.0305305	631.806	216.455	94	97	0.8	89	14023.5	85	97	151	121	0	2.3	11.4	11.8	6.4	4.9	1.4	1.5	2.9	1.2	1	0	154	428	274	177.922
CC1DCD1E3F	YK2109	81210_1	81155_1	F	HIGH FAT	2023-08-23	7	11	NA	NA	NA	NA	NA	NA	0.159477	0.759779	0.0743667	0.823133	0.0851107	-0.063354	515.464	164.911	85	80	0.4	79	16571.8	45	62	71	63	0	2	7.6	6	14.7	5.6	1	1.2	2.2	1.8	2.8	2	120	294	174	145
CC1DCD1E40	YK2066	80853_2	80882_1	M	HIGH FAT	2023-08-03	6	6	33873	12574	21299	4755	4249	506	0.227384	0.722574	0.074893	0.830765	0.152491	-0.10819	1245.37	285.412	103	90	2.7	110	20887.1	82	129	47	31	0	2	14.7	20	19.5	8.5	1.3	1.4	2.7	1.4	1	3	139	501	362	260.432
CC1DCD1E41	YK2078	81425_2	81405_1	M	HIGH FAT	2023-08-06	2	13	NA	NA	NA	NA	NA	NA	0.116914	0.81761	0.0703741	0.817415	0.0465398	0.000194924	517.061	271.517	74	50	1.3	113	15207.8	87	70	46	35	0	2	10.4	10.3	8.9	4.2	1.1	1.1	2.2	1.1	1	3	113	375	262	231.858
CC1DCD1E43	YK2142	81474_2	81433_1	M	LOW FAT	2023-09-11	3	5	NA	NA	NA	NA	NA	NA	0.0962973	0.836	0.0568022	0.842222	0.0394951	-0.00622222	409.971	198.591	100	80	0.3	90	13105.6	78	78	57	31	0	2	8.2	6.7	5.6	3	NA	2	NA	1	1.8	2	138	371	233	168.841
CC1DCD1E44	YK2120	81472_2	81461_1	M	LOW FAT	2023-08-29	3	13	67590	20416	47174	9125.5	8915.33	210.167	0.121713	0.800602	0.0558252	0.832071	0.0658877	-0.0314693	662.029	236.296	115	104	0.8	98	17007.8	75	98	56	32	0	1.9	12.6	5.9	7.5	2.6	1.3	1.2	2.5	1.3	1.4	3	122	380	258	211.475
CC1DCD1E46	YK2145	80917_2	81013_1	F	HIGH FAT	2023-09-11	8	14	NA	NA	NA	NA	NA	NA	0.133708	0.761049	0.0568889	0.762133	0.076819	-0.00108464	457.812	136.996	52	61	1.2	85	14642.5	58	43	49	31	0	1.7	5.8	2.7	4.3	2	0.7	0.7	1.4	0.7	0.7	0	83	201	118	142.169
CC1DCD1E47	YK2091	81463_2	81592_1	F	LOW FAT	2023-08-13	2	12	NA	NA	NA	NA	NA	NA	0.00331541	0.895251	0.0348667	0.848267	-0.0315513	0.0469842	-82.3136	96.3023	70	64	NA	84	14372.7	NA	NA	NA	NA	NA	2	5.2	0.5	1	0.7	0.7	0.7	1.4	0.8	0.9	0	113	189	76	67.2566
CC1DCD1E49	YK2126	81712_2	81701_1	M	HIGH FAT	2023-09-03	2	13	NA	NA	NA	NA	NA	NA	0.125878	0.814433	0.0457282	0.84	0.0801495	-0.0255674	904.883	253.937	83	60	1.4	106	15635.5	88	93	60	48	0	1.9	9.1	8.1	6.2	2.6	1.1	1.1	2.2	1.4	1.2	2	123	379	256	208.13
CC1DCD1E4A	YK2083	81560_2	81678_1	F	HIGH FAT	2023-08-08	1	8	NA	NA	NA	NA	NA	NA	0.0813793	0.834641	0.074081	0.809969	0.00729831	0.024672	138.183	123.427	66	60	0.166667	87	15378.3	49	51	48	37	0	2.1	6.3	2.9	3.3	1.3	1	1	2	1	1	0	124	228	104	83.871
CC1DCD1E4C	YK2127	81712_2	81701_1	F	LOW FAT	2023-09-03	2	13	NA	NA	NA	NA	NA	NA	0.0310017	0.891105	0.0543023	0.844496	-0.0233006	0.0466092	28.1228	136.805	86	83	0.1	70	13165.3	NA	NA	NA	NA	NA	1.7	5.7	0.8	2.3	1	0.7	0.6	1.3	0.9	0.9	0	100	197	97	97
CC1DCD1E4E	YK2092	81459_2	81559_1	M	HIGH FAT	2023-08-13	2	12	38141	18041	20100	5354	4554.67	799.333	0.22715	0.711466	0.0683073	0.812865	0.158843	-0.101399	1063.9	206.34	100	78	1.5	95	17729.1	97	64	58	43	0	1.8	13.2	20.8	13.3	8.6	1.4	1.4	2.8	1.6	2.5	3	150	471	321	214
E11DCD3239	YK1253	78121_2	79464_1	F	LOW FAT	2022-04-10	1	12	67301	22511	44790	9718	9601.67	116.333	0.0772358	0.829821	0.0438144	0.842955	0.0334213	-0.0131342	272.549	108.047	83	74	NA	76	14190	NA	NA	NA	NA	NA	2	6.8	1.9	3.9	1.7	0.6	0.7	1.3	0.8	1.1	0	108	228	120	111.111
E11DCD329E	YK1250	79124_2	78798_1	M	HIGH FAT	2022-04-09	1	10	36766	11941	24825	5224.5	4648	576.5	0.164853	0.779857	0.0589231	0.829	0.10593	-0.0491432	801.741	203.201	96	71	2	95	14940	64	87	63	51	0	2	7.2	15.3	10.3	5.2	1.2	1.1	2.3	1.2	1.2	0	148	443	295	199.324
E11DCD355E	YK1252	78121_2	79464_1	M	HIGH FAT	2022-04-10	1	12	NA	NA	NA	NA	NA	NA	0.161168	0.765082	0.0480702	0.843275	0.113098	-0.0781932	1099.94	224.709	100	66	1.6	97	18390	61	126	56	34	0	2	9.7	12.2	9.5	4.4	1.3	1.1	2.4	1.1	0.8	0	128	427	299	233.594
E11DCD35AA	YK1251	79124_2	78798_1	F	LOW FAT	2022-04-09	1	10	62054	26641	35413	7660	8266.33	-606.333	0.0802653	0.812968	0.0765732	0.812835	0.00369213	0.0001336	96.9081	87.8813	70	78	0.333333	75	16447.5	63	72	66	29	0	1.8	5.1	2.1	4.6	2	0.7	0.6	1.3	0.9	1	0	121	221	100	82.6446
EE1DCD2A47	YK037	74122_2	74201_1	M	LOW FAT	2019-11-24	6	6	NA	NA	NA	NA	NA	NA	0.0817424	0.833258	NA	NA	NA	NA	NA	NA	NA	NA	1.3	84	15810	NA	NA	NA	NA	NA	2.2	4.3	7.2	8.7	NA	1.3	1.3	2.6	NA	NA	0	229	421	192	83.8428
EE1DCD2A58	YK038	74122_2	74201_1	M	LOW FAT	2019-11-24	6	6	NA	NA	NA	NA	NA	NA	0.113028	0.813138	NA	NA	NA	NA	NA	NA	NA	NA	1.6365	81	15742.5	NA	NA	NA	NA	NA	2.1	4.3	8.5	7.9	NA	1.3	1.3	2.6	NA	NA	0	219	441	222	101.37
EE1DCD2A59	YK040	74133_2	74180_1	F	LOW FAT	2019-11-24	5	7	NA	NA	NA	NA	NA	NA	0.0492747	0.853565	NA	NA	NA	NA	NA	NA	NA	NA	NA	76	13552.5	NA	NA	NA	NA	NA	1.8	2	1	2.6	NA	0.8	0.8	1.6	NA	NA	0	135	228	93	68.8889
EE1DCD2A68	YK044	74528_2	74763_2	F	LOW FAT	2019-11-24	1	10	NA	NA	NA	NA	NA	NA	0.0678989	0.831043	NA	NA	NA	NA	NA	NA	NA	NA	NA	67	14122.5	NA	NA	NA	NA	NA	1.9	2.5	1.7	3.2	NA	0.7	0.8	1.5	NA	NA	0	134	231	97	72.3881
EE1DCD2A6F	YK048	74232_2	74597_1	F	LOWFAT	2019-11-28	6	12	NA	NA	NA	NA	NA	NA	0.0381121	0.865398	NA	NA	NA	NA	NA	NA	NA	NA	0.301	86	13740	NA	NA	NA	NA	NA	1.9	2.2	1.2	2.5	NA	0.8	0.8	1.6	NA	NA	0	117	241	124	105.983
EE1DCD2A76	YK042	74155_2	74207_1	M	HIGH FAT	2019-11-25	5	5	NA	NA	NA	NA	NA	NA	0.175067	0.760337	NA	NA	NA	NA	NA	NA	NA	NA	1.3	98	23520	NA	NA	NA	NA	NA	2	3	7.7	9.2	NA	1.2	1.2	2.4	NA	NA	0	157	354	197	125.478
EE1DCD2A79	YK046	74232_2	74597_1	M	HIGHFAT	2019-11-28	6	12	NA	NA	NA	NA	NA	NA	0.124229	0.804866	NA	NA	NA	NA	NA	NA	NA	NA	0.605	98	18375	NA	NA	NA	NA	NA	1.9	2.9	5.5	6.8	NA	1.2	1.1	2.3	NA	NA	0	127	353	226	177.953
EE1DCD2A7C	YK045	74232_2	74121_1	M	LOW FAT	2019-11-28	6	12	NA	NA	NA	NA	NA	NA	0.110292	0.803469	NA	NA	NA	NA	NA	NA	NA	NA	0.7	88	15232.5	NA	NA	NA	NA	NA	1.9	4.3	4.8	6.6	NA	1.1	1.2	2.3	NA	NA	0	127	349	222	174.803
EE1DCD2A84	YK041	74155_2	74207_1	M	LOW FAT	2019-11-25	5	5	NA	NA	NA	NA	NA	NA	0.167251	0.758509	NA	NA	NA	NA	NA	NA	NA	NA	1.7935	99	17662.5	NA	NA	NA	NA	NA	2	3.3	6.7	8.3	NA	1.2	1.2	2.4	NA	NA	0	187	372	185	98.9305
EE1DCD2A91	YK039	74122_2	74201_1	F	LOW FAT	2019-11-24	6	6	NA	NA	NA	NA	NA	NA	0.0235606	0.867712	NA	NA	NA	NA	NA	NA	NA	NA	0.315	74	14025	NA	NA	NA	NA	NA	2.1	2.4	0.8	2.1	NA	0.9	0.9	1.8	NA	NA	0	148	240	92	62.1622
EE1DCD2A93	YK047	74232_2	74597_1	F	HIGH FAT	2019-11-28	6	12	NA	NA	NA	NA	NA	NA	0.130508	0.785297	NA	NA	NA	NA	NA	NA	NA	NA	0.24375	87	16035	NA	NA	NA	NA	NA	1.8	2.3	2	5.3	NA	0.7	0.7	1.4	NA	NA	0	119	237	118	99.1597
EE1DCD2A9D	YK043	74528_2	74763_2	F	HIGH FAT	2019-11-24	1	10	NA	NA	NA	NA	NA	NA	0.0754762	0.824201	NA	NA	NA	NA	NA	NA	NA	NA	0.334	82	15075	NA	NA	NA	NA	NA	1.9	2.6	1.5	2.4	NA	0.7	0.7	1.4	NA	NA	0	130	213	83	63.8462
EE1DCD2AA8	YK084	74727_1	74594_1	F	LOW FAT	2019-12-29	2	8	NA	NA	NA	NA	NA	NA	NA	NA	NA	NA	NA	NA	NA	NA	NA	NA	NA	NA	NA	NA	NA	NA	NA	NA	NA	NA	NA	NA	NA	NA	NA	NA	NA	NA	NA	120	NA	NA	NA
EE1DCD2AAC	YK059	74203_2	74232_1	F	HIGH FAT	2019-12-14	7	3	NA	NA	NA	NA	NA	NA	NA	NA	NA	NA	NA	NA	NA	NA	NA	NA	NA	NA	NA	NA	NA	NA	NA	NA	NA	NA	NA	NA	NA	NA	NA	NA	NA	NA	NA	138	NA	NA	NA
EE1DCD2AAF	YK103	74708_1	74753_1	F	HIGH FAT	2020-01-25	4	12	NA	NA	NA	NA	NA	NA	NA	NA	NA	NA	NA	NA	NA	NA	NA	NA	NA	NA	NA	NA	NA	NA	NA	NA	NA	NA	NA	NA	NA	NA	NA	NA	NA	NA	NA	144	NA	NA	NA
EE1DCD2AB1	YK070	74193_2	74128_1	M	LOW FAT	2019-12-22	5	9	NA	NA	NA	NA	NA	NA	NA	NA	NA	NA	NA	NA	NA	NA	NA	NA	NA	NA	NA	NA	NA	NA	NA	NA	NA	NA	NA	NA	NA	NA	NA	NA	NA	NA	NA	194	NA	NA	NA
EE1DCD2AB3	YK054	74188_2	74168_1	M	LOWFAT	2019-12-14	7	10	NA	NA	NA	NA	NA	NA	NA	NA	NA	NA	NA	NA	NA	NA	NA	NA	NA	NA	NA	NA	NA	NA	NA	NA	NA	NA	NA	NA	NA	NA	NA	NA	NA	NA	NA	203	NA	NA	NA
EE1DCD2AB5	YK061	74780_1	74552_1	M	LOW FAT	2019-12-21	2	8	NA	NA	NA	NA	NA	NA	NA	NA	NA	NA	NA	NA	NA	NA	NA	NA	NA	NA	NA	NA	NA	NA	NA	NA	NA	NA	NA	NA	NA	NA	NA	NA	NA	NA	NA	191	NA	NA	NA
EE1DCD2AB6	YK085	74208_2	74217_3	M	HIGH FAT	2020-01-04	8	6	NA	NA	NA	NA	NA	NA	NA	NA	NA	NA	NA	NA	NA	NA	NA	NA	NA	NA	NA	NA	NA	NA	NA	NA	NA	NA	NA	NA	NA	NA	NA	NA	NA	NA	NA	160	NA	NA	NA
EE1DCD2AB7	YK049	74125_2	74192_1	M	HIGH FAT	2019-12-14	6	8	NA	NA	NA	NA	NA	NA	NA	NA	NA	NA	NA	NA	NA	NA	NA	NA	NA	NA	NA	NA	NA	NA	NA	NA	NA	NA	NA	NA	NA	NA	NA	NA	NA	NA	NA	196	NA	NA	NA
EE1DCD2ABA	YK091	74207_2	74142_1	F	LOW FAT	2020-01-04	7	7	NA	NA	NA	NA	NA	NA	NA	NA	NA	NA	NA	NA	NA	NA	NA	NA	NA	NA	NA	NA	NA	NA	NA	NA	NA	NA	NA	NA	NA	NA	NA	NA	NA	NA	NA	141	NA	NA	NA
EE1DCD2ABB	YK060	74813_1	74658_1	F	LOWFAT	2019-12-14	2	15	NA	NA	NA	NA	NA	NA	NA	NA	NA	NA	NA	NA	NA	NA	NA	NA	NA	NA	NA	NA	NA	NA	NA	NA	NA	NA	NA	NA	NA	NA	NA	NA	NA	NA	NA	126	NA	NA	NA
EE1DCD2ABC	YK099	74165_2	74177_1	F	HIGH FAT	2020-01-25	9	9	NA	NA	NA	NA	NA	NA	NA	NA	NA	NA	NA	NA	NA	NA	NA	NA	NA	NA	NA	NA	NA	NA	NA	NA	NA	NA	NA	NA	NA	NA	NA	NA	NA	NA	NA	137	NA	NA	NA
EE1DCD2ABE	YK105	74566_2	74599_1	M	HIGH FAT	2020-01-25	4	8	NA	NA	NA	NA	NA	NA	NA	NA	NA	NA	NA	NA	NA	NA	NA	NA	NA	NA	NA	NA	NA	NA	NA	NA	NA	NA	NA	NA	NA	NA	NA	NA	NA	NA	NA	220	NA	NA	NA
EE1DCD2ABF	YK053	74188_2	74168_1	M	HIGH FAT	2019-12-14	7	10	NA	NA	NA	NA	NA	NA	NA	NA	NA	NA	NA	NA	NA	NA	NA	NA	NA	NA	NA	NA	NA	NA	NA	NA	NA	NA	NA	NA	NA	NA	NA	NA	NA	NA	NA	209	NA	NA	NA
EE1DCD2AC1	YK050	74125_2	74192_1	M	HIGH FAT	2019-12-14	6	8	NA	NA	NA	NA	NA	NA	NA	NA	NA	NA	NA	NA	NA	NA	NA	NA	NA	NA	NA	NA	NA	NA	NA	NA	NA	NA	NA	NA	NA	NA	NA	NA	NA	NA	NA	174	NA	NA	NA
EE1DCD2AC3	YK076	74202_2	74127_1	F	LOW FAT	2019-12-29	7	10	NA	NA	NA	NA	NA	NA	NA	NA	NA	NA	NA	NA	NA	NA	NA	NA	NA	NA	NA	NA	NA	NA	NA	NA	NA	NA	NA	NA	NA	NA	NA	NA	NA	NA	NA	137	NA	NA	NA
EE1DCD2AC4	YK096	74686_2	74701_1	F	LOW FAT	2020-01-04	3	13	NA	NA	NA	NA	NA	NA	NA	NA	NA	NA	NA	NA	NA	NA	NA	NA	NA	NA	NA	NA	NA	NA	NA	NA	NA	NA	NA	NA	NA	NA	NA	NA	NA	NA	NA	150	NA	NA	NA
EE1DCD2AC5	YK088	74208_2	74217_3	F	LOW FAT	2020-01-04	8	6	NA	NA	NA	NA	NA	NA	NA	NA	NA	NA	NA	NA	NA	NA	NA	NA	NA	NA	NA	NA	NA	NA	NA	NA	NA	NA	NA	NA	NA	NA	NA	NA	NA	NA	NA	128	NA	NA	NA
EE1DCD2AC6	YK051	74125_2	74192_1	F	HIGH FAT	2019-12-14	6	8	NA	NA	NA	NA	NA	NA	NA	NA	NA	NA	NA	NA	NA	NA	NA	NA	NA	NA	NA	NA	NA	NA	NA	NA	NA	NA	NA	NA	NA	NA	NA	NA	NA	NA	NA	132	NA	NA	NA
EE1DCD2AC7	YK081	74727_1	74594_1	M	LOW FAT	2019-12-29	2	8	NA	NA	NA	NA	NA	NA	NA	NA	NA	NA	NA	NA	NA	NA	NA	NA	NA	NA	NA	NA	NA	NA	NA	NA	NA	NA	NA	NA	NA	NA	NA	NA	NA	NA	NA	136	NA	NA	NA
EE1DCD2AC8	YK056	74188_2	74168_1	F	LOWFAT	2019-12-14	7	10	NA	NA	NA	NA	NA	NA	NA	NA	NA	NA	NA	NA	NA	NA	NA	NA	NA	NA	NA	NA	NA	NA	NA	NA	NA	NA	NA	NA	NA	NA	NA	NA	NA	NA	NA	150	NA	NA	NA
EE1DCD2ACA	YK098	74165_2	74177_1	M	HIGH FAT	2020-01-25	9	9	NA	NA	NA	NA	NA	NA	NA	NA	NA	NA	NA	NA	NA	NA	NA	NA	NA	NA	NA	NA	NA	NA	NA	NA	NA	NA	NA	NA	NA	NA	NA	NA	NA	NA	NA	176	NA	NA	NA
EE1DCD2ACC	YK097	74165_2	74177_1	M	HIGH FAT	2020-01-25	9	9	NA	NA	NA	NA	NA	NA	NA	NA	NA	NA	NA	NA	NA	NA	NA	NA	NA	NA	NA	NA	NA	NA	NA	NA	NA	NA	NA	NA	NA	NA	NA	NA	NA	NA	NA	178	NA	NA	NA
EE1DCD2ACD	YK073	74202_2	74127_1	M	HIGH FAT	2019-12-29	7	10	NA	NA	NA	NA	NA	NA	NA	NA	NA	NA	NA	NA	NA	NA	NA	NA	NA	NA	NA	NA	NA	NA	NA	NA	NA	NA	NA	NA	NA	NA	NA	NA	NA	NA	NA	161	NA	NA	NA
EE1DCD2ACF	YK102	74708_1	74753_1	M	LOW FAT	2020-01-25	4	12	NA	NA	NA	NA	NA	NA	NA	NA	NA	NA	NA	NA	NA	NA	NA	NA	NA	NA	NA	NA	NA	NA	NA	NA	NA	NA	NA	NA	NA	NA	NA	NA	NA	NA	NA	178	NA	NA	NA
EE1DCD2AD1	YK101	74708_1	74753_1	M	HIGH FAT	2020-01-25	4	12	NA	NA	NA	NA	NA	NA	NA	NA	NA	NA	NA	NA	NA	NA	NA	NA	NA	NA	NA	NA	NA	NA	NA	NA	NA	NA	NA	NA	NA	NA	NA	NA	NA	NA	NA	196	NA	NA	NA
EE1DCD2AD2	YK095	74686_2	74701_1	F	HIGH FAT	2020-01-04	3	13	NA	NA	NA	NA	NA	NA	NA	NA	NA	NA	NA	NA	NA	NA	NA	NA	NA	NA	NA	NA	NA	NA	NA	NA	NA	NA	NA	NA	NA	NA	NA	NA	NA	NA	NA	151	NA	NA	NA
EE1DCD2AD3	YK052	74125_2	74192_1	F	HIGH FAT	2019-12-14	6	8	NA	NA	NA	NA	NA	NA	NA	NA	NA	NA	NA	NA	NA	NA	NA	NA	NA	NA	NA	NA	NA	NA	NA	NA	NA	NA	NA	NA	NA	NA	NA	NA	NA	NA	NA	138	NA	NA	NA
EE1DCD2AD5	YK062	74780_1	74552_1	M	HIGH FAT	2019-12-21	2	8	NA	NA	NA	NA	NA	NA	NA	NA	NA	NA	NA	NA	NA	NA	NA	NA	NA	NA	NA	NA	NA	NA	NA	NA	NA	NA	NA	NA	NA	NA	NA	NA	NA	NA	NA	191	NA	NA	NA
EE1DCD2AD7	YK065	74121_2	74196_1	M	LOW FAT	2019-12-22	7	4	NA	NA	NA	NA	NA	NA	NA	NA	NA	NA	NA	NA	NA	NA	NA	NA	NA	NA	NA	NA	NA	NA	NA	NA	NA	NA	NA	NA	NA	NA	NA	NA	NA	NA	NA	141	NA	NA	NA
EE1DCD2AD9	YK087	74208_2	74217_3	F	HIGH FAT	2020-01-04	8	6	NA	NA	NA	NA	NA	NA	NA	NA	NA	NA	NA	NA	NA	NA	NA	NA	NA	NA	NA	NA	NA	NA	NA	NA	NA	NA	NA	NA	NA	NA	NA	NA	NA	NA	NA	127	NA	NA	NA
EE1DCD2ADA	YK071	74193_2	74128_1	F	LOW FAT	2019-12-22	5	9	NA	NA	NA	NA	NA	NA	NA	NA	NA	NA	NA	NA	NA	NA	NA	NA	NA	NA	NA	NA	NA	NA	NA	NA	NA	NA	NA	NA	NA	NA	NA	NA	NA	NA	NA	135	NA	NA	NA
EE1DCD2ADB	YK086	74208_2	74217_3	M	LOW FAT	2020-01-04	8	6	NA	NA	NA	NA	NA	NA	NA	NA	NA	NA	NA	NA	NA	NA	NA	NA	NA	NA	NA	NA	NA	NA	NA	NA	NA	NA	NA	NA	NA	NA	NA	NA	NA	NA	NA	163	NA	NA	NA
EE1DCD2ADC	YK078	74204_2	74145_1	F	HIGH FAT	2019-12-30	8	6	NA	NA	NA	NA	NA	NA	NA	NA	NA	NA	NA	NA	NA	NA	NA	NA	NA	NA	NA	NA	NA	NA	NA	NA	NA	NA	NA	NA	NA	NA	NA	NA	NA	NA	NA	124	NA	NA	NA
EE1DCD2ADD	YK104	74708_1	74753_1	F	HIGH FAT	2020-01-25	4	12	NA	NA	NA	NA	NA	NA	NA	NA	NA	NA	NA	NA	NA	NA	NA	NA	NA	NA	NA	NA	NA	NA	NA	NA	NA	NA	NA	NA	NA	NA	NA	NA	NA	NA	NA	145	NA	NA	NA
EE1DCD2ADF	YK063	74780_1	74552_1	F	HIGH FAT	2019-12-21	2	8	NA	NA	NA	NA	NA	NA	NA	NA	NA	NA	NA	NA	NA	NA	NA	NA	NA	NA	NA	NA	NA	NA	NA	NA	NA	NA	NA	NA	NA	NA	NA	NA	NA	NA	NA	161	NA	NA	NA
EE1DCD2AE1	YK107	74566_2	74599_1	F	HIGH FAT	2020-01-25	4	8	NA	NA	NA	NA	NA	NA	NA	NA	NA	NA	NA	NA	NA	NA	NA	NA	NA	NA	NA	NA	NA	NA	NA	NA	NA	NA	NA	NA	NA	NA	NA	NA	NA	NA	NA	156	NA	NA	NA
EE1DCD2AE2	YK068	74780_1	74552_1	F	LOW FAT	2019-12-21	2	8	NA	NA	NA	NA	NA	NA	NA	NA	NA	NA	NA	NA	NA	NA	NA	NA	NA	NA	NA	NA	NA	NA	NA	NA	NA	NA	NA	NA	NA	NA	NA	NA	NA	NA	NA	148	NA	NA	NA
EE1DCD2AE3	YK075	74202_2	74127_1	F	HIGH FAT	2019-12-29	7	10	NA	NA	NA	NA	NA	NA	NA	NA	NA	NA	NA	NA	NA	NA	NA	NA	NA	NA	NA	NA	NA	NA	NA	NA	NA	NA	NA	NA	NA	NA	NA	NA	NA	NA	NA	118	NA	NA	NA
EE1DCD2AE4	YK067	74728_1	74784_1	F	HIGH FAT	2019-12-21	2	4	NA	NA	NA	NA	NA	NA	NA	NA	NA	NA	NA	NA	NA	NA	NA	NA	NA	NA	NA	NA	NA	NA	NA	NA	NA	NA	NA	NA	NA	NA	NA	NA	NA	NA	NA	150	NA	NA	NA
EE1DCD2AE5	YK094	74686_2	74701_1	M	LOW FAT	2020-01-04	3	13	NA	NA	NA	NA	NA	NA	NA	NA	NA	NA	NA	NA	NA	NA	NA	NA	NA	NA	NA	NA	NA	NA	NA	NA	NA	NA	NA	NA	NA	NA	NA	NA	NA	NA	NA	196	NA	NA	NA
EE1DCD2AE6	YK108	74566_2	74599_1	F	LOW FAT	2020-01-25	4	8	NA	NA	NA	NA	NA	NA	NA	NA	NA	NA	NA	NA	NA	NA	NA	NA	NA	NA	NA	NA	NA	NA	NA	NA	NA	NA	NA	NA	NA	NA	NA	NA	NA	NA	NA	134	NA	NA	NA
EE1DCD2AE8	YK072	74193_2	74128_1	F	LOW FAT	2019-12-22	5	9	NA	NA	NA	NA	NA	NA	NA	NA	NA	NA	NA	NA	NA	NA	NA	NA	NA	NA	NA	NA	NA	NA	NA	NA	NA	NA	NA	NA	NA	NA	NA	NA	NA	NA	NA	156	NA	NA	NA
EE1DCD2AEA	YK055	74188_2	74168_1	F	HIGH FAT	2019-12-14	7	10	NA	NA	NA	NA	NA	NA	NA	NA	NA	NA	NA	NA	NA	NA	NA	NA	NA	NA	NA	NA	NA	NA	NA	NA	NA	NA	NA	NA	NA	NA	NA	NA	NA	NA	NA	147	NA	NA	NA
EE1DCD2AEC	YK077	74204_2	74145_1	M	HIGH FAT	2019-12-30	8	6	NA	NA	NA	NA	NA	NA	NA	NA	NA	NA	NA	NA	NA	NA	NA	NA	NA	NA	NA	NA	NA	NA	NA	NA	NA	NA	NA	NA	NA	NA	NA	NA	NA	NA	NA	138	NA	NA	NA
EE1DCD2AEE	YK100	74165_2	74177_1	F	LOW FAT	2020-01-25	9	9	NA	NA	NA	NA	NA	NA	NA	NA	NA	NA	NA	NA	NA	NA	NA	NA	NA	NA	NA	NA	NA	NA	NA	NA	NA	NA	NA	NA	NA	NA	NA	NA	NA	NA	NA	148	NA	NA	NA
EE1DCD2AEF	YK106	74177_2	74125_1	M	LOW FAT	2020-01-26	8	7	NA	NA	NA	NA	NA	NA	NA	NA	NA	NA	NA	NA	NA	NA	NA	NA	NA	NA	NA	NA	NA	NA	NA	NA	NA	NA	NA	NA	NA	NA	NA	NA	NA	NA	NA	191	NA	NA	NA
EE1DCD2AF6	YK057	74203_2	74232_1	M	HIGH FAT	2019-12-14	7	3	NA	NA	NA	NA	NA	NA	NA	NA	NA	NA	NA	NA	NA	NA	NA	NA	NA	NA	NA	NA	NA	NA	NA	NA	NA	NA	NA	NA	NA	NA	NA	NA	NA	NA	NA	172	NA	NA	NA
EE1DCD2AF8	YK080	74204_2	74145_1	F	HIGH FAT	2019-12-30	8	6	NA	NA	NA	NA	NA	NA	NA	NA	NA	NA	NA	NA	NA	NA	NA	NA	NA	NA	NA	NA	NA	NA	NA	NA	NA	NA	NA	NA	NA	NA	NA	NA	NA	NA	NA	124	NA	NA	NA
EE1DCD2AFA	YK082	74727_1	74594_1	M	LOW FAT	2019-12-29	2	8	NA	NA	NA	NA	NA	NA	NA	NA	NA	NA	NA	NA	NA	NA	NA	NA	NA	NA	NA	NA	NA	NA	NA	NA	NA	NA	NA	NA	NA	NA	NA	NA	NA	NA	NA	124	NA	NA	NA
EE1DCD2AFC	YK079	74204_2	74145_1	M	LOW FAT	2019-12-30	8	6	NA	NA	NA	NA	NA	NA	NA	NA	NA	NA	NA	NA	NA	NA	NA	NA	NA	NA	NA	NA	NA	NA	NA	NA	NA	NA	NA	NA	NA	NA	NA	NA	NA	NA	NA	157	NA	NA	NA
EE1DCD2AFD	YK069	74193_2	74128_1	M	HIGH FAT	2019-12-22	5	9	NA	NA	NA	NA	NA	NA	NA	NA	NA	NA	NA	NA	NA	NA	NA	NA	NA	NA	NA	NA	NA	NA	NA	NA	NA	NA	NA	NA	NA	NA	NA	NA	NA	NA	NA	179	NA	NA	NA
EE1DCD2AFE	YK058	74203_2	74232_1	M	LOWFAT	2019-12-14	7	3	NA	NA	NA	NA	NA	NA	NA	NA	NA	NA	NA	NA	NA	NA	NA	NA	NA	NA	NA	NA	NA	NA	NA	NA	NA	NA	NA	NA	NA	NA	NA	NA	NA	NA	NA	175	NA	NA	NA
EE1DCD2AFF	YK092	74207_2	74142_1	F	LOW FAT	2020-01-04	7	7	NA	NA	NA	NA	NA	NA	NA	NA	NA	NA	NA	NA	NA	NA	NA	NA	NA	NA	NA	NA	NA	NA	NA	NA	NA	NA	NA	NA	NA	NA	NA	NA	NA	NA	NA	159	NA	NA	NA
EE1DCD2B00	YK093	74686_2	74701_1	M	LOW FAT	2020-01-04	3	13	NA	NA	NA	NA	NA	NA	NA	NA	NA	NA	NA	NA	NA	NA	NA	NA	NA	NA	NA	NA	NA	NA	NA	NA	NA	NA	NA	NA	NA	NA	NA	NA	NA	NA	NA	203	NA	NA	NA
EE1DCD2B01	YK066	74121_2	74196_1	M	LOW FAT	2019-12-22	7	4	NA	NA	NA	NA	NA	NA	NA	NA	NA	NA	NA	NA	NA	NA	NA	NA	NA	NA	NA	NA	NA	NA	NA	NA	NA	NA	NA	NA	NA	NA	NA	NA	NA	NA	NA	152	NA	NA	NA
EE1DCD2B04	YK064	74728_1	74784_1	F	LOW FAT	2019-12-21	2	4	NA	NA	NA	NA	NA	NA	NA	NA	NA	NA	NA	NA	NA	NA	NA	NA	NA	NA	NA	NA	NA	NA	NA	NA	NA	NA	NA	NA	NA	NA	NA	NA	NA	NA	NA	123	NA	NA	NA
EE1DCD2B05	YK089	74207_2	74142_1	M	HIGH FAT	2020-01-04	7	7	NA	NA	NA	NA	NA	NA	NA	NA	NA	NA	NA	NA	NA	NA	NA	NA	NA	NA	NA	NA	NA	NA	NA	NA	NA	NA	NA	NA	NA	NA	NA	NA	NA	NA	NA	208	NA	NA	NA
EE1DCD2B06	YK090	74207_2	74142_1	M	LOW FAT	2020-01-04	7	7	NA	NA	NA	NA	NA	NA	NA	NA	NA	NA	NA	NA	NA	NA	NA	NA	NA	NA	NA	NA	NA	NA	NA	NA	NA	NA	NA	NA	NA	NA	NA	NA	NA	NA	NA	195	NA	NA	NA
EE1DCD2B07	YK074	74202_2	74127_1	M	LOW FAT	2019-12-29	7	10	NA	NA	NA	NA	NA	NA	NA	NA	NA	NA	NA	NA	NA	NA	NA	NA	NA	NA	NA	NA	NA	NA	NA	NA	NA	NA	NA	NA	NA	NA	NA	NA	NA	NA	NA	180	NA	NA	NA
EE1DCD2B0A	YK083	74727_1	74594_1	F	HIGH FAT	2019-12-29	2	8	NA	NA	NA	NA	NA	NA	NA	NA	NA	NA	NA	NA	NA	NA	NA	NA	NA	NA	NA	NA	NA	NA	NA	NA	NA	NA	NA	NA	NA	NA	NA	NA	NA	NA	NA	105	NA	NA	NA
EE1DCD2B0C	YK177	75285_2	75078_1	M	LOW FAT	2020-05-24	3	10	NA	NA	NA	NA	NA	NA	0.140905	0.781149	NA	NA	NA	NA	NA	NA	116	51	1.7	100	19245	NA	NA	NA	NA	NA	2	12.2	11.8	7.9	4.5	1.3	1.4	2.7	1.5	1.9	0	162	407	245	151.235
EE1DCD2B0D	YK182	75192_2	75237_1	F	LOW FAT	2020-05-31	3	11	NA	NA	NA	NA	NA	NA	0.0630997	0.844346	NA	NA	NA	NA	NA	NA	61	73	0.3	92	16275	NA	NA	NA	NA	NA	NA	5.6	2.1	3.7	1.1	0.7	0.6	1.3	0.7	1.2	0	116	229	113	97.4138
EE1DCD2B0E	YK166	75066_2	75096_1	F	HIGH FAT	2020-05-11	3	12	NA	NA	NA	NA	NA	NA	0.059188	0.860869	NA	NA	NA	NA	NA	NA	55	NA	0.7	98	16537.5	NA	NA	NA	NA	NA	1.8	7.3	2	3.5	0.7	0.8	0.8	1.6	0.9	1.4	0	138	237	99	71.7391
EE1DCD2B0F	YK218	75287_2	75090_1	F	LOW FAT	2020-07-04	4	8	NA	NA	NA	NA	NA	NA	0.0931389	0.824986	NA	NA	NA	NA	NA	NA	90	98	0.333333	69	17655	NA	NA	NA	NA	NA	2	14.1	1	2.9	2.2	0.8	0.8	1.6	1	1.1	0	120	219	99	82.5
EE1DCD2B11	YK197	75113_2	75187_1	M	LOW FAT	2020-06-14	4	14	NA	NA	NA	NA	NA	NA	0.0909418	0.838381	NA	NA	NA	NA	NA	NA	79	90	NA	84	15802.5	68	118	90	40	0	1.9	10.2	5.5	5.2	3	1.1	1.1	2.2	1.2	1.8	0	111	340	229	206.306
EE1DCD2B12	YK171	75144_2	75164_1	M	HIGH FAT	2020-05-23	4	14	NA	NA	NA	NA	NA	NA	0.140796	0.78702	NA	NA	NA	NA	NA	NA	82	39	1.9	93	18435	NA	NA	NA	NA	NA	1.9	10.6	12.4	9.9	4.9	1.2	1.2	2.4	1.1	1.4	0	142	405	263	185.211
EE1DCD2B13	YK158	75096_2	75147_1	F	LOW FAT	2020-05-09	3	9	NA	NA	NA	NA	NA	NA	0.00424383	0.903981	NA	NA	NA	NA	NA	NA	90	NA	1.162	131	14857.5	NA	NA	NA	NA	NA	1.7	7.1	0.5	0.5	0.1	0.7	0.6	1.3	0.7	1.4	0	127	225	98	77.1654
EE1DCD2B14	YK229	75135_2	75086_1	M	HIGH FAT	2020-07-11	5	11	NA	NA	NA	NA	NA	NA	0.0971737	0.830357	NA	NA	NA	NA	NA	NA	81	63	NA	185	19080	NA	NA	NA	NA	NA	2	9.6	5.8	5.1	3	1.1	1.1	2.2	1	1.5	0	128	357	229	178.906
EE1DCD2B15	YK228	75141_2	75205_1	F	LOW FAT	2020-07-06	5	10	NA	NA	NA	NA	NA	NA	0.0536883	0.867531	NA	NA	NA	NA	NA	NA	81	93	0.633333	110	15360	NA	NA	NA	NA	NA	2	7.1	1.8	3.2	1.8	0.9	0.9	1.8	0.9	1.1	0	124	241	117	94.3548
EE1DCD2B16	YK167	75169_2	75112_1	M	LOW FAT	2020-05-11	3	14	NA	NA	NA	NA	NA	NA	0.210939	0.707375	NA	NA	NA	NA	NA	NA	85	NA	3.1	117	19312.5	NA	NA	NA	NA	NA	1.9	9.3	9.1	9	5.7	1.1	1	2.1	0.8	1.6	0	146	349	203	139.041
EE1DCD2B17	YK212	75826_2	75815_2	F	HIGH FAT	2020-06-21	1	10	NA	NA	NA	NA	NA	NA	0.0784493	0.831406	NA	NA	NA	NA	NA	NA	72	74	0.633333	92	18352.5	NA	NA	NA	NA	NA	1.7	7.9	1.2	3	1.2	0.7	0.7	1.4	1	0.9	0	116	271	155	133.621
EE1DCD2B18	YK194	75079_2	75206_1	F	LOW FAT	2020-06-13	4	12	NA	NA	NA	NA	NA	NA	0.0587135	0.839474	NA	NA	NA	NA	NA	NA	30	50	NA	76	14677.5	89	44	85	34	13	1.7	5.9	1.1	1.7	1.4	0.7	0.7	1.4	0.8	1.1	0	90	196	106	117.778
EE1DCD2B1A	YK150	75128_2	75281_1	F	LOW FAT	2020-05-05	2	11	NA	NA	NA	NA	NA	NA	0.0843874	0.77693	NA	NA	NA	NA	NA	NA	89	122	0.6	94	19170	NA	NA	NA	NA	NA	1.7	7.4	3.8	7.5	2.6	0.8	0.8	1.6	1	1.3	0	103	263	160	155.34
EE1DCD2B1C	YK200	75188_2	75166_1	F	HIGH FAT	2020-06-14	4	15	NA	NA	NA	NA	NA	NA	0.124598	0.78996	NA	NA	NA	NA	NA	NA	84	71	NA	82	18480	66	50	73	38	36.7	1.8	8.6	3.2	7	2.2	0.9	0.8	1.7	0.9	1.4	0	109	265	156	143.119
EE1DCD2B1D	YK219	75771_4	75847_1	M	HIGH FAT	2020-07-08	1	12	NA	NA	NA	NA	NA	NA	0.0856968	0.843023	NA	NA	NA	NA	NA	NA	80	78	1.4	94	16777.5	NA	NA	NA	NA	NA	2	10.2	6.7	5.8	3.8	1.2	1.1	2.3	1.1	1.5	0	115	389	274	238.261
EE1DCD2B1E	YK192	75688_2	75697_1	F	HIGH FAT	2020-06-05	1	9	NA	NA	NA	NA	NA	NA	0.133528	0.783423	NA	NA	NA	NA	NA	NA	60	42	NA	114	18045	NA	NA	NA	NA	NA	1.9	8	3.6	8.4	2.2	1	0.9	1.9	0.8	1.5	0	102	248	146	143.137
EE1DCD2B1F	YK161	75085_2	75129_1	M	LOW FAT	2020-05-10	3	14	NA	NA	NA	NA	NA	NA	0.117952	0.807304	NA	NA	NA	NA	NA	NA	84	NA	2.4	118	16785	NA	NA	NA	NA	NA	2	9.4	6.4	6.5	4.6	1	1	2	0.9	1.3	0	138	326	188	136.232
EE1DCD2B20	YK151	75142_2	75191_1	M	LOW FAT	2020-05-05	3	12	NA	NA	NA	NA	NA	NA	0.167929	0.75863	NA	NA	NA	NA	NA	NA	93	131	1.3	86	14025	NA	NA	NA	NA	NA	1.7	8.5	6.9	5.6	3.6	0.9	0.9	1.8	1.1	1.1	0	124	328	204	164.516
EE1DCD2B21	YK201	75158_2	75133_1	M	HIGH FAT	2020-06-15	4	7	NA	NA	NA	NA	NA	NA	0.142211	0.792752	NA	NA	NA	NA	NA	NA	79	78	1.3	93	16732.5	91	73	61	47	30	2.2	13.3	8.8	10.7	4.9	1.4	1.4	2.8	1.3	1.7	0	159	409	250	157.233
EE1DCD2B22	YK178	75285_2	75078_1	F	HIGH FAT	2020-05-24	3	10	NA	NA	NA	NA	NA	NA	0.090755	0.816937	NA	NA	NA	NA	NA	NA	72	117	0.466667	99	18990	NA	NA	NA	NA	NA	1.8	8	4.1	5.9	2.2	0.9	0.9	1.8	1.1	1.4	0	129	265	136	105.426
EE1DCD2B23	YK195	75136_2	75092_1	M	HIGH FAT	2020-06-14	3	9	NA	NA	NA	NA	NA	NA	0.121598	0.811564	NA	NA	NA	NA	NA	NA	82	89	1.4	112	15630	72	58	74	53	7	1.9	10.8	8.4	8.5	4.5	1.2	1.2	2.4	1.4	2.1	0	140	412	272	194.286
EE1DCD2B24	YK183	75070_2	75185_1	M	HIGH FAT	2020-06-01	3	11	NA	NA	NA	NA	NA	NA	0.177761	0.753489	NA	NA	NA	NA	NA	NA	91	98	1.9	114	19725	NA	NA	NA	NA	NA	1.9	10.9	17.8	11.6	7.7	1	1	2	1.1	1.3	0	121	446	325	268.595
EE1DCD2B25	YK153	75185_2	75132_1	M	HIGH FAT	2020-05-07	3	10	NA	NA	NA	NA	NA	NA	0.112578	0.827767	NA	NA	NA	NA	NA	NA	99	130	1.3	93	17790	NA	NA	NA	NA	NA	1.8	11.9	9.8	9.9	3.6	1.2	1.3	2.5	1.2	1.5	0	112	424	312	278.571
EE1DCD2B26	YK165	75066_2	75096_1	M	LOW FAT	2020-05-11	3	12	NA	NA	NA	NA	NA	NA	0.105959	0.830275	NA	NA	NA	NA	NA	NA	95	NA	2.5	131	18217.5	NA	NA	NA	NA	NA	1.9	9.1	6.1	5.8	2.3	1	1	2	1	1.5	0	160	337	177	110.625
EE1DCD2B27	YK190	75758_3	75708_1	F	HIGH FAT	2020-06-02	1	13	NA	NA	NA	NA	NA	NA	0.0908255	0.825312	NA	NA	NA	NA	NA	NA	59	48	0.866667	82	15540	NA	NA	NA	NA	NA	1.8	6.8	2.9	6	2.4	0.7	0.7	1.4	1	1	0	91	228	137	150.549
EE1DCD2B28	YK211	75826_2	75815_2	M	LOW FAT	2020-06-21	1	10	NA	NA	NA	NA	NA	NA	0.104092	0.826906	NA	NA	NA	NA	NA	NA	91	90	1.2	85	16777.5	NA	NA	NA	NA	NA	2.2	10.3	5.7	5.2	2.7	1	1	2	1	1.5	0	126	347	221	175.397
EE1DCD2B29	YK207	75133_2	75197_1	M	HIGH FAT	2020-06-20	4	14	NA	NA	NA	NA	NA	NA	0.0573822	0.874127	NA	NA	NA	NA	NA	NA	83	81	0.6	79	15825	NA	NA	NA	NA	NA	2.2	10.6	5.8	3.4	3	1.2	1.1	2.3	1.1	1.5	0	137	403	266	194.161
EE1DCD2B2A	YK172	75144_2	75164_1	F	LOW FAT	2020-05-23	4	14	NA	NA	NA	NA	NA	NA	0.0314339	0.87648	NA	NA	NA	NA	NA	NA	70	120	0.9	98	16815	NA	NA	NA	NA	NA	1.7	5.6	1.7	2.2	0.9	0.6	0.7	1.3	0.8	0.9	0	108	211	103	95.3704
EE1DCD2B2B	YK180	75138_2	75067_1	F	HIGH FAT	2020-05-25	3	13	NA	NA	NA	NA	NA	NA	0.0957839	0.8114	NA	NA	NA	NA	NA	NA	70	126	0.733333	94	18480	NA	NA	NA	NA	NA	1.8	7.5	2.7	6.6	2.4	0.8	0.8	1.6	0.9	1.1	0	123	234	111	90.2439
EE1DCD2B2C	YK217	75287_2	75090_1	M	HIGH FAT	2020-07-04	4	8	NA	NA	NA	NA	NA	NA	0.179193	0.751022	NA	NA	NA	NA	NA	NA	112	98	1.8	106	16905	NA	NA	NA	NA	NA	2.1	15.1	14.4	11.4	7.3	1.6	1.5	3.1	1.3	2	0	166	484	318	191.566
EE1DCD2B2E	YK223	75206_2	75114_1	M	LOW FAT	2020-07-06	5	6	NA	NA	NA	NA	NA	NA	0.0729639	0.854184	NA	NA	NA	NA	NA	NA	131	87	0.8	79	18165	NA	NA	NA	NA	NA	2	12.3	6.4	5.8	3.8	1.3	1.3	2.6	1.4	1.6	0	139	410	271	194.964
EE1DCD2B30	YK209	75832_3	75808_1	M	LOW FAT	2020-06-21	1	9	NA	NA	NA	NA	NA	NA	0.134932	0.793756	NA	NA	NA	NA	NA	NA	62	50	2.8	79	14640	NA	NA	NA	NA	NA	1.9	10.5	5.2	4.7	3.8	0.9	1	1.9	1.1	1.5	0	125	303	178	142.4
EE1DCD2B31	YK193	75079_2	75206_1	M	HIGH FAT	2020-06-13	4	12	NA	NA	NA	NA	NA	NA	0.218702	0.707452	NA	NA	NA	NA	NA	NA	77	71	1.6	94	16987.5	69	64	67	49	0	1.9	9.9	12.4	7.9	4.8	1.1	1.1	2.2	1	1.8	0	126	366	240	190.476
EE1DCD2B32	YK169	75076_2	75072_1	M	HIGH FAT	2020-05-23	3	8	NA	NA	NA	NA	NA	NA	0.12771	0.798673	NA	NA	NA	NA	NA	NA	96	31	NA	100	20467.5	NA	NA	NA	NA	NA	1.9	11.8	10.9	10.2	5.8	1.3	1.3	2.6	1.4	1.6	0	144	463	319	221.528
EE1DCD2B34	YK214	75776_4	75799_2	F	HIGH FAT	2020-06-21	1	8	NA	NA	NA	NA	NA	NA	0.133424	0.774042	NA	NA	NA	NA	NA	NA	58	58	0.366667	86	22627.5	NA	NA	NA	NA	NA	1.8	6.7	2.6	5.4	2.3	0.7	0.6	1.3	0.9	1	0	114	238	124	108.772
EE1DCD2B35	YK191	75688_2	75697_1	M	LOW FAT	2020-06-05	1	9	NA	NA	NA	NA	NA	NA	0.0989714	0.824457	NA	NA	NA	NA	NA	NA	90	97	NA	96	13207.5	NA	NA	NA	NA	NA	2	12.1	5.4	6.5	2.9	1.3	1.4	2.7	1.3	2	0	106	370	264	249.057
EE1DCD2B36	YK221	75127_2	75189_1	M	LOW FAT	2020-07-05	5	5	NA	NA	NA	NA	NA	NA	0.114955	0.814624	NA	NA	NA	NA	NA	NA	129	102	1.3	89	15360	NA	NA	NA	NA	NA	2	12.5	7.1	9.6	4.4	1.3	1.3	2.6	1.1	1.7	0	136	398	262	192.647
EE1DCD2B37	YK204	75065_2	75073_1	F	LOW FAT	2020-06-15	4	9	NA	NA	NA	NA	NA	NA	0.118813	0.789102	NA	NA	NA	NA	NA	NA	69	91	0.3	81	13732.5	77	52	64	27	35	1.8	8	1.9	5.1	1.8	NA	1.4	NA	1	1.4	0	114	245	131	114.912
EE1DCD2B38	YK198	75113_2	75187_1	F	HIGH FAT	2020-06-14	4	14	NA	NA	NA	NA	NA	NA	0.101116	0.819487	NA	NA	NA	NA	NA	NA	71	65	NA	95	15682.5	66	43	86	41	7	2	7	2.5	6.3	1.9	0.9	0.9	1.8	1.1	1.4	0	109	239	130	119.266
EE1DCD2B39	YK184	75070_2	75185_1	F	LOW FAT	2020-06-01	3	11	NA	NA	NA	NA	NA	NA	0.0916457	0.822664	NA	NA	NA	NA	NA	NA	101	101	0.65	89	16140	NA	NA	NA	NA	NA	1.9	10.2	3.7	6.8	2.6	0.9	0.8	1.7	0.9	1.4	0	114	265	151	132.456
EE1DCD2B3B	YK196	75136_2	75092_1	F	LOW FAT	2020-06-14	3	9	NA	NA	NA	NA	NA	NA	0.0979477	0.808926	NA	NA	NA	NA	NA	NA	87	76	NA	82	13822.5	100	NA	85	46	NA	1.8	7.3	3.7	3.6	1.7	0.9	0.9	1.8	0.8	1	0	131	256	125	95.4198
EE1DCD2B3C	YK227	75141_2	75205_1	M	HIGH FAT	2020-07-06	5	10	NA	NA	NA	NA	NA	NA	0.203994	0.739891	NA	NA	NA	NA	NA	NA	32	70	2.2	89	28792.5	NA	NA	NA	NA	NA	2.1	11.6	19.6	16.5	8	1.5	1.5	3	1.4	1.9	0	172	484	312	181.395
EE1DCD2B3D	YK188	75731_2	75743_1	F	HIGH FAT	2020-06-02	1	11	NA	NA	NA	NA	NA	NA	0.0407443	0.87254	NA	NA	NA	NA	NA	NA	65	57	NA	55	14535	NA	NA	NA	NA	NA	2	6.9	1.7	3.6	1.2	0.7	0.7	1.4	0.8	1.2	0	96	243	147	153.125
EE1DCD2B3E	YK160	75236_2	75285_1	F	LOW FAT	2020-05-10	3	6	NA	NA	NA	NA	NA	NA	0.0907738	0.82186	NA	NA	NA	NA	NA	NA	59	NA	1.5	113	16215	NA	NA	NA	NA	NA	1.9	7	3.5	5.2	3.1	0.7	0.7	1.4	0.7	1.4	0	117	238	121	103.419
EE1DCD2B3F	YK157	75096_2	75147_1	M	HIGH FAT	2020-05-09	3	9	NA	NA	NA	NA	NA	NA	0.130135	0.802425	NA	NA	NA	NA	NA	NA	70	NA	1.8	101	14992.5	NA	NA	NA	NA	NA	1.8	8.5	7.4	9	5	1.1	1.1	2.2	1	1.6	0	136	363	227	166.912
EE1DCD2B40	YK149	75128_2	75281_1	M	HIGH FAT	2020-05-05	2	11	NA	NA	NA	NA	NA	NA	0.231384	0.710871	NA	NA	NA	NA	NA	NA	115	133	2.2	109	19860	NA	NA	NA	NA	NA	1.9	12.1	18.1	13.1	9.1	1.2	1.3	2.5	1.2	2.1	0	122	462	340	278.689
EE1DCD2B41	YK146	75217_2	75261_1	F	LOW FAT	2020-05-04	4	12	NA	NA	NA	NA	NA	NA	0.159378	0.81971	NA	NA	NA	NA	NA	NA	76	131	0.4	85	12180	NA	NA	NA	NA	NA	1.7	8.8	2.8	5.1	3.7	0.8	0.8	1.6	0.9	1.2	0	114	265	151	132.456
EE1DCD2B42	YK216	75696_1	75760_1	F	HIGH FAT	2020-06-22	1	14	NA	NA	NA	NA	NA	NA	0.155333	0.75803	NA	NA	NA	NA	NA	NA	67	54	0.8	86	14962.5	NA	NA	NA	NA	NA	1.8	6.6	3.6	7.8	2.7	0.8	0.6	1.4	0.8	1.3	0	101	240	139	137.624
EE1DCD2B43	YK162	75085_2	75129_1	F	HIGH FAT	2020-05-10	3	14	NA	NA	NA	NA	NA	NA	0.0901986	0.835078	NA	NA	NA	NA	NA	NA	66	NA	0.733333	102	14640	NA	NA	NA	NA	NA	1.9	7.1	2.4	5.6	2.7	0.9	0.7	1.6	0.8	1.3	0	128	239	111	86.7188
EE1DCD2B44	YK147	75112_2	75071_1	M	LOW FAT	2020-05-04	3	5	NA	NA	NA	NA	NA	NA	0.115308	0.810265	NA	NA	NA	NA	NA	NA	88	139	1.8	101	16072.5	NA	NA	NA	NA	NA	1.7	11.5	5.7	5.4	3.1	1.1	1.1	2.2	1.1	1.7	0	130	335	205	157.692
EE1DCD2B45	YK187	75731_2	75743_1	M	LOW FAT	2020-06-02	1	11	NA	NA	NA	NA	NA	NA	0.101672	0.837547	NA	NA	NA	NA	NA	NA	106	87	1.4	98	19965	NA	NA	NA	NA	NA	1.8	10.7	7.8	4.8	3.3	1	1	2	1	1.8	0	116	367	251	216.379
EE1DCD2B47	YK226	75157_2	75070_1	F	LOW FAT	2020-07-06	5	10	NA	NA	NA	NA	NA	NA	0.0781973	0.834728	NA	NA	NA	NA	NA	NA	61	53	0.2	85	16732.5	NA	NA	NA	NA	NA	1.7	6.1	1	2.7	1.4	0.8	0.8	1.6	0.8	1.3	0	115	209	94	81.7391
EE1DCD2B48	YK154	75185_2	75132_1	F	LOW FAT	2020-05-07	3	10	NA	NA	NA	NA	NA	NA	0.0981978	0.778979	NA	NA	NA	NA	NA	NA	65	127	0.233333	80	15105	NA	NA	NA	NA	NA	1.5	7.9	3.1	5	2	0.8	0.8	1.6	0.9	1.5	0	101	234	133	131.683
EE1DCD2B49	YK179	75138_2	75067_1	M	LOW FAT	2020-05-25	3	13	NA	NA	NA	NA	NA	NA	0.0545213	0.8632	NA	NA	NA	NA	NA	NA	117	61	NA	84	13635	NA	NA	NA	NA	NA	2	12	9.7	NA	2.1	1.2	1.2	2.4	1.3	1.9	0	135	405	270	200
EE1DCD2B4A	YK225	75157_2	75070_1	M	HIGH FAT	2020-07-06	5	10	NA	NA	NA	NA	NA	NA	0.0817848	0.845608	NA	NA	NA	NA	NA	NA	88	80	1	94	16380	NA	NA	NA	NA	NA	1.9	9.9	6	5.1	2.5	1.3	1.3	2.6	1.2	1.4	0	146	397	251	171.918
EE1DCD2B4B	YK159	75236_2	75285_1	M	HIGH FAT	2020-05-10	3	6	NA	NA	NA	NA	NA	NA	0.139117	0.805652	NA	NA	NA	NA	NA	NA	79	NA	4	117	18525	NA	NA	NA	NA	NA	2	10.7	9.1	9.7	5.6	1.1	1.3	2.4	1.3	1.5	0	147	420	273	185.714
EE1DCD2B4C	YK155	75142_2	75191_1	M	HIGH FAT	2020-05-05	3	12	NA	NA	NA	NA	NA	NA	0.140168	0.785608	NA	NA	NA	NA	NA	NA	70	110	1.5	80	17265	NA	NA	NA	NA	NA	1.9	10.8	11.5	10.8	4.7	1.2	1.3	2.5	1.1	2.1	0	135	389	254	188.148
EE1DCD2B4D	YK205	75203_2	75068_1	M	HIGH FAT	2020-06-20	4	10	NA	NA	NA	NA	NA	NA	0.140918	0.800435	NA	NA	NA	NA	NA	NA	83	78	2.5	92	16897.5	NA	NA	NA	NA	NA	2	11.4	11.5	11.4	4.3	1.3	1.3	2.6	1.2	1.8	0	154	433	279	181.169
EE1DCD2B4E	YK208	75133_2	75197_1	F	LOW FAT	2020-06-20	4	14	NA	NA	NA	NA	NA	NA	0.0209014	0.887262	NA	NA	NA	NA	NA	NA	74	80	0.166667	61	8782.5	NA	NA	NA	NA	NA	1.8	6.4	1.1	2.1	1.3	0.7	0.7	1.4	0.7	1.2	0	110	228	118	107.273
EE1DCD2B4F	YK163	75187_2	75143_1	M	LOW FAT	2020-05-11	3	12	NA	NA	NA	NA	NA	NA	0.132058	0.799424	NA	NA	NA	NA	NA	NA	90	NA	2.1	125	16110	NA	NA	NA	NA	NA	2	9.3	9.6	7.7	4.7	0.9	0.8	1.7	1	1	0	129	333	204	158.14
EE1DCD2B51	YK152	75142_2	75191_1	F	HIGH FAT	2020-05-05	3	12	NA	NA	NA	NA	NA	NA	0.0881646	0.834251	NA	NA	NA	NA	NA	NA	67	112	NA	93	14415	NA	NA	NA	NA	NA	1.7	7.3	2.9	3.8	2.3	NA	1.3	NA	0.8	1.3	0	112	245	133	118.75
EE1DCD2B52	YK202	75158_2	75133_1	F	LOW FAT	2020-06-15	4	7	NA	NA	NA	NA	NA	NA	0.0344591	0.879503	NA	NA	NA	NA	NA	NA	77	73	0.1	76	14940	50	48	64	27	43.3	1.9	7.5	1.1	3.1	1.3	0.9	0.9	1.8	0.9	1.4	0	138	249	111	80.4348
EE1DCD2B54	YK206	75203_2	75068_1	F	LOW FAT	2020-06-20	4	10	NA	NA	NA	NA	NA	NA	0.0664039	0.835731	NA	NA	NA	NA	NA	NA	70	83	0.9	71	14092.5	NA	NA	NA	NA	NA	1.9	6.2	1.3	3.2	1.7	NA	1.1	NA	0.8	1.2	0	130	222	92	70.7692
EE1DCD2B56	YK210	75832_3	75808_1	F	HIGH FAT	2020-06-21	1	9	NA	NA	NA	NA	NA	NA	0.146015	0.778504	NA	NA	NA	NA	NA	NA	63	70	1.76667	80	15607.5	NA	NA	NA	NA	NA	1.7	7.5	2.3	7.1	2.1	0.8	0.7	1.5	0.9	1.5	0	118	241	123	104.237
EE1DCD2B57	YK181	75192_2	75237_1	M	HIGH FAT	2020-05-31	3	11	NA	NA	NA	NA	NA	NA	0.159918	0.769891	NA	NA	NA	NA	NA	NA	86	81	1.8	112	18720	NA	NA	NA	NA	NA	2	10.2	11.5	10.9	4.8	1.1	1.1	2.2	1.2	1.4	0	145	391	246	169.655
EE1DCD2B58	YK185	75706_2	75698_1	M	LOW FAT	2020-06-02	1	9	NA	NA	NA	NA	NA	NA	0.0993247	0.831628	NA	NA	NA	NA	NA	NA	112	90	1.3	100	15697.5	NA	NA	NA	NA	NA	2.3	13.5	7.6	6.8	3.6	1.2	1.3	2.5	1.2	2.4	0	135	402	267	197.778
EE1DCD2B59	YK189	75758_3	75708_1	M	LOW FAT	2020-06-02	1	13	NA	NA	NA	NA	NA	NA	0.125232	0.800811	NA	NA	NA	NA	NA	NA	95	92	NA	103	19215	NA	NA	NA	NA	NA	2.1	12.5	8.6	9	5.2	1.1	1.1	2.2	1.3	2.2	0	113	377	264	233.628
EE1DCD2B5B	YK222	75127_2	75189_1	F	HIGH FAT	2020-07-05	5	5	NA	NA	NA	NA	NA	NA	0.153467	0.758688	NA	NA	NA	NA	NA	NA	80	51	1.03333	89	15810	NA	NA	NA	NA	NA	2	8.2	3.6	8.1	2.6	0.9	0.9	1.8	0.9	1	0	120	247	127	105.833
EE1DCD2B5D	YK199	75188_2	75166_1	M	LOW FAT	2020-06-14	4	15	NA	NA	NA	NA	NA	NA	0.0913399	0.820697	NA	NA	NA	NA	NA	NA	108	100	NA	79	14790	51	95	82	36	0	2.1	8.7	5.3	3.6	3.1	NA	1.5	NA	2.1	1.4	0	117	334	217	185.47
EE1DCD2B5E	YK215	75696_1	75760_1	M	LOW FAT	2020-06-22	1	14	NA	NA	NA	NA	NA	NA	0.101328	0.83192	NA	NA	NA	NA	NA	NA	111	87	1.6	87	13777.5	NA	NA	NA	NA	NA	1.6	11.8	7.1	7	4.1	1	1	2	1	1.5	0	124	369	245	197.581
EE1DCD2B5F	YK203	75065_2	75073_1	M	HIGH FAT	2020-06-15	4	9	NA	NA	NA	NA	NA	NA	0.134533	0.794018	NA	NA	NA	NA	NA	NA	80	74	0.8	66	16072.5	100	77	56	52	43.3	1.9	10.3	9.7	7.2	4.5	NA	2	NA	1.2	1.7	0	138	381	243	176.087
EE1DCD2B60	YK220	75771_4	75847_1	F	LOW FAT	2020-07-08	1	12	NA	NA	NA	NA	NA	NA	0.0622274	0.849268	NA	NA	NA	NA	NA	NA	73	86	0.3	69	13920	NA	NA	NA	NA	NA	1.7	NA	1.2	1.7	1.7	0.7	0.7	1.4	0.9	0.8	0	91	211	120	131.868
EE1DCD2B61	YK176	75235_2	75188_1	F	LOW FAT	2020-05-23	3	3	NA	NA	NA	NA	NA	NA	0.0837975	0.8082	NA	NA	NA	NA	NA	NA	80	143	0.5	87	18787.5	NA	NA	NA	NA	NA	1.9	8.2	3.7	7.8	3.1	0.8	0.8	1.6	1.1	1.3	0	115	258	143	124.348
EE1DCD2B62	YK168	75169_2	75112_1	F	HIGH FAT	2020-05-11	3	14	NA	NA	NA	NA	NA	NA	0.0886312	0.81306	NA	NA	NA	NA	NA	NA	58	NA	0.9	103	14842.5	NA	NA	NA	NA	NA	1.7	5.5	2.1	4.2	1.8	0.7	0.7	1.4	0.7	1	0	128	208	80	62.5
EE1DCD2B63	YK213	75776_4	75799_2	M	LOW FAT	2020-06-21	1	8	NA	NA	NA	NA	NA	NA	0.144854	0.785136	NA	NA	NA	NA	NA	NA	96	95	1.9	85	15787.5	NA	NA	NA	NA	NA	1.9	11.3	6.7	7.7	4.9	1.3	1.2	2.5	1.2	1.2	0	134	380	246	183.582
EE1DCD2B64	YK148	75112_2	75071_1	F	HIGH FAT	2020-05-04	3	5	NA	NA	NA	NA	NA	NA	0.159592	0.788495	NA	NA	NA	NA	NA	NA	74	114	0.615	101	14040	NA	NA	NA	NA	NA	1.6	8.4	9.7	6.2	2.6	1	0.9	1.9	0.9	1.5	0	133	256	123	92.4812
EE1DCD2B65	YK170	75076_2	75072_1	F	LOW FAT	2020-05-23	3	8	NA	NA	NA	NA	NA	NA	0.0776316	0.813123	NA	NA	NA	NA	NA	NA	73	124	NA	92	14497.5	NA	NA	NA	NA	NA	1.8	5.6	2.5	4.4	1.6	0.8	0.8	1.6	0.8	1.3	0	107	210	103	96.2617
EE1DCD2B67	YK175	75235_2	75188_1	M	HIGH FAT	2020-05-23	3	3	NA	NA	NA	NA	NA	NA	NA	NA	NA	NA	NA	NA	NA	NA	94	NA	NA	NA	NA	NA	NA	NA	NA	NA	NA	NA	NA	NA	NA	NA	NA	NA	NA	NA	NA	165	NA	NA	NA
EE1DCD2B68	YK156	75142_2	75191_1	F	LOW FAT	2020-05-05	3	12	NA	NA	NA	NA	NA	NA	0.070198	0.868218	NA	NA	NA	NA	NA	NA	47	107	NA	90	14595	NA	NA	NA	NA	NA	1.7	5.6	2	4.8	1	0.8	0.8	1.6	0.8	1.5	0	114	212	98	85.9649
EE1DCD2B69	YK224	75206_2	75114_1	F	HIGH FAT	2020-07-06	5	6	NA	NA	NA	NA	NA	NA	0.051874	0.836406	NA	NA	NA	NA	NA	NA	65	60	0.433333	88	16942.5	NA	NA	NA	NA	NA	1.9	6.4	1	1.9	0.9	0.8	0.8	1.6	0.9	0.8	0	114	216	102	89.4737
EE1DCD2B6A	YK164	75187_2	75143_1	F	HIGH FAT	2020-05-11	3	12	NA	NA	NA	NA	NA	NA	0.0783704	0.837896	NA	NA	NA	NA	NA	NA	81	NA	0.5	99	14827.5	NA	NA	NA	NA	NA	1.7	6.3	2.7	5.4	2.3	0.8	0.8	1.6	0.8	1.6	0	126	227	101	80.1587
EE1DCD2B6C	YK173	75068_2	75080_1	M	HIGH FAT	2020-05-23	3	7	NA	NA	NA	NA	NA	NA	0.0768085	0.84961	NA	NA	NA	NA	NA	NA	78	78	NA	91	15630	NA	NA	NA	NA	NA	1.9	9.6	7.2	6.5	3.5	1.2	1.1	2.3	1.4	1.7	0	167	399	232	138.922
EE1DCD2B6D	YK174	75068_2	75080_1	F	LOW FAT	2020-05-23	3	7	NA	NA	NA	NA	NA	NA	0.0453037	0.869156	NA	NA	NA	NA	NA	NA	76	137	NA	98	17085	NA	NA	NA	NA	NA	1.8	7.3	3	5.5	2.4	0.7	0.7	1.4	0.9	1.3	0	115	270	155	134.783
EE1DCD2B6E	YK145	75217_2	75261_1	M	HIGH FAT	2020-05-04	4	12	NA	NA	NA	NA	NA	NA	0.163515	0.76075	NA	NA	NA	NA	NA	NA	92	127	1.6	90	19320	NA	NA	NA	NA	NA	2.1	11.25	12.7	11.7	4.8	1.2	1.2	2.4	1.1	2.3	0	142	431	289	203.521
EE1DCD2B6F	YK186	75706_2	75698_1	F	HIGH FAT	2020-06-02	1	9	NA	NA	NA	NA	NA	NA	0.161107	0.751444	NA	NA	NA	NA	NA	NA	73	65	1.73333	102	15735	NA	NA	NA	NA	NA	2	8.9	6.2	11.1	4.1	1	1	2	0.8	1.8	0	128	292	164	128.125
EE1DCD2B70	YK278	75840_2	75741_1	F	LOW FAT	2020-08-22	3	14	NA	NA	NA	NA	NA	NA	0.0836893	0.836197	0.0715789	0.835811	0.0121104	0.000386007	58.4559	35.5889	72	67	0.266667	86	16117.5	NA	NA	NA	NA	NA	1.8	5.5	2	5.6	1.8	0.7	0.7	1.4	0.9	1	0	149	218	69	46.3087
EE1DCD2B71	YK258	75828_3	75826_1	F	HIGH FAT	2020-07-26	2	12	NA	NA	NA	NA	NA	NA	0.216318	0.712753	0.13502	0.777627	0.0812986	-0.0648748	170.476	54.7392	50	31	0.633333	89	17137.5	NA	NA	NA	NA	NA	1.8	6.2	5.7	10.1	3.3	0.9	0.8	1.7	1	1.3	0	158	290	132	83.5443
EE1DCD2B72	YK280	75754_4	75694_1	F	LOW FAT	2020-08-23	3	10	NA	NA	NA	NA	NA	NA	0.0662787	0.851695	0.0452469	0.858724	0.0210318	-0.00702888	109.777	42.0377	95	91	0.333333	73	13170	NA	NA	NA	NA	NA	1.8	6.7	1.7	2.9	1.4	0.8	0.8	1.6	1.1	0.7	0	158	259	101	63.9241
EE1DCD2B73	YK290	75710_2	75692_1	F	LOW FAT	2020-08-29	4	11	NA	NA	NA	NA	NA	NA	0.0745426	0.833008	0.0667778	0.849778	0.00776486	-0.01677	60	40.5047	58	NA	0.3	68	14190	NA	NA	NA	NA	NA	1.8	5.7	1.7	3.8	1.8	0.8	0.8	1.6	0.8	1.1	0	145	232	87	60
EE1DCD2B75	YK235	75755_4	75736_1	M	LOW FAT	2020-07-12	2	6	NA	NA	NA	NA	NA	NA	0.19194	0.733772	NA	NA	NA	NA	NA	NA	116	82	3.1	83	16372.5	NA	NA	NA	NA	NA	1.9	8.7	12.4	7	3.8	0.9	0.9	1.8	1.2	1.5	0	137	362	225	164.234
EE1DCD2B76	YK316	75694_2	75757_1	F	LOW FAT	2020-09-19	5	8	NA	NA	NA	NA	NA	NA	0.0669243	0.847391	0.0437903	0.858333	0.023134	-0.010942	155.126	64.8074	75	100	0.7	87	17220	NA	NA	NA	NA	NA	1.8	6	1.8	5.2	1.9	0.9	0.9	1.8	0.9	0.9	0	120	245	125	104.167
EE1DCD2B78	YK259	75701_2	75798_1	M	LOW FAT	2020-07-26	2	12	NA	NA	NA	NA	NA	NA	0.20691	0.723854	0.0488652	0.851152	0.158044	-0.127298	764.877	73.7069	90	73	2.2	84	17520	NA	NA	NA	NA	NA	2.1	10.4	10.4	9.9	5.3	1.1	1.1	2.2	1.4	1.3	0	175	402	227	129.714
EE1DCD2B79	YK236	75755_4	75736_1	F	HIGH FAT	2020-07-12	2	6	NA	NA	NA	NA	NA	NA	0.18535	0.746111	NA	NA	NA	NA	NA	NA	77	74	NA	99	19492.5	NA	NA	NA	NA	NA	1.9	8.2	6	10.6	3.2	1	0.8	1.8	1	1.5	0	126	303	177	140.476
EE1DCD2B7A	YK283	75798_3	75702_1	M	LOW FAT	2020-08-24	3	11	NA	NA	NA	NA	NA	NA	0.144916	0.784101	0.052204	0.855592	0.0927117	-0.0714909	440.021	78.2807	95	87	1	85	14902.5	NA	NA	NA	NA	NA	2	9.3	7.5	8	3.9	1	1	2	1.1	1.4	0	170	368	198	116.471
EE1DCD2B7B	YK297	75756_3	75701_1	M	HIGH FAT	2020-08-29	3	13	NA	NA	NA	NA	NA	NA	0.168259	0.768612	0.0656623	0.851266	0.102597	-0.0826539	354.312	60.0783	68	NA	1.9	86	11865	NA	NA	NA	NA	NA	2	9.6	10.7	9.3	5.3	1.1	1.1	2.2	1	1.9	0	217	414	197	90.7834
EE1DCD2B7C	YK269	75752_3	75805_1	M	LOW FAT	2020-08-16	3	8	NA	NA	NA	NA	NA	NA	0.182642	0.749587	0.0863743	0.824288	0.0962674	-0.0747016	329.09	84.5339	107	90	1.6	95	15667.5	NA	NA	NA	NA	NA	2	9.5	9.6	8.3	4.4	1	1	2	1.4	1.9	0	160	363	203	126.875
EE1DCD2B7E	YK248	75137_2	75142_1	F	HIGH FAT	2020-07-19	5	9	NA	NA	NA	NA	NA	NA	0.0361395	0.876752	0.0409195	0.856466	-0.00478008	0.0202862	49.2275	72.9676	58	52	0.433333	93	15622.5	NA	NA	NA	NA	NA	1.8	6.4	1	1.4	1.3	0.8	0.8	1.6	0.8	1.2	0	109	213	104	95.4128
EE1DCD2B7F	YK277	75840_2	75741_1	M	HIGH FAT	2020-08-22	3	14	NA	NA	NA	NA	NA	NA	0.204508	0.720694	0.113391	0.783565	0.0911167	-0.062871	210.671	58.4331	59	52	NA	118	17760	NA	NA	NA	NA	NA	1.9	6.5	8.8	7	3.3	0.9	0.9	1.8	1.3	1	0	156	303	147	94.2308
EE1DCD2B82	YK291	75698_2	75825_2	M	HIGH FAT	2020-08-29	3	11	NA	NA	NA	NA	NA	NA	0.125974	0.819325	0.0488527	0.881628	0.0771213	-0.0623032	361.758	66.4152	73	NA	0.6	101	19762.5	NA	NA	NA	NA	NA	1.9	10.2	9.3	6.6	2.6	1.2	1.3	2.5	1.1	1.8	0	197	402	205	104.061
EE1DCD2B83	YK289	75710_2	75692_1	M	HIGH FAT	2020-08-29	4	11	NA	NA	NA	NA	NA	NA	0.153263	0.771024	0.0800647	0.849498	0.0731986	-0.0784748	254.042	67.8661	73	NA	1.6	99	14707.5	NA	NA	NA	NA	NA	1.9	9.6	9.3	7.1	4.7	1	1.1	2.1	1.3	1.6	0	191	389	198	103.665
EE1DCD2B84	YK231	75953_3	75759_2	M	HIGH FAT	2020-07-12	1	12	NA	NA	NA	NA	NA	NA	0.13498	0.791202	NA	NA	NA	NA	NA	NA	92	76	NA	208	18285	NA	NA	NA	NA	NA	1.8	7.9	6.5	7.6	3.1	1	1	2	1.1	0.9	0	112	334	222	198.214
EE1DCD2B85	YK247	75137_2	75142_1	M	LOW FAT	2020-07-19	5	9	NA	NA	NA	NA	NA	NA	0.146491	0.785789	0.0487686	0.860552	0.0977227	-0.0747625	554.332	98.9095	108	80	3	84	14497.5	NA	NA	NA	NA	NA	2	10.3	7.4	6.3	4	1	1	2	1	1.5	0	145	356	211	145.517
EE1DCD2B86	YK239	75700_2	75714_1	M	LOW FAT	2020-07-13	2	8	NA	NA	NA	NA	NA	NA	0.0851532	0.844429	NA	NA	NA	NA	NA	NA	118	88	1.9	83	12652.5	NA	NA	NA	NA	NA	2	12.3	5.9	5.8	2.7	1.1	1.1	2.2	1.2	1.9	0	129	372	243	188.372
EE1DCD2B87	YK294	75924_2	75742_1	F	HIGH FAT	2020-08-29	3	14	NA	NA	NA	NA	NA	NA	0.144697	0.784432	0.095144	0.821975	0.0495529	-0.0375435	147.837	55.5197	30	NA	0.366667	94	15487.5	NA	NA	NA	NA	NA	1.9	6.6	3.4	9.6	3.2	0.8	0.8	1.6	1.2	1.5	0	154	266	112	72.7273
EE1DCD2B88	YK292	75698_2	75825_2	F	LOW FAT	2020-08-29	3	11	NA	NA	NA	NA	NA	NA	0.0468437	0.864248	0.0465161	0.859914	0.000327529	0.00433381	46.8331	46.5413	58	NA	0.0173333	67	14947.5	NA	NA	NA	NA	NA	1.8	6.2	1.2	1.9	1.1	0.7	0.8	1.5	0.8	0.8	0	155	239	84	54.1935
EE1DCD2B89	YK287	75775_4	75810_2	M	LOW FAT	2020-08-24	3	13	NA	NA	NA	NA	NA	NA	0.119951	0.809376	0.0487329	0.866608	0.0712183	-0.057232	392.28	86.7917	109	80	1.8	88	14677.5	NA	NA	NA	NA	NA	1.9	10.3	7.3	5.3	2.4	1.3	1.2	2.5	1	1.2	0	161	354	193	119.876
EE1DCD2B8B	YK272	75830_3	75811_2	F	HIGH FAT	2020-08-16	3	3	NA	NA	NA	NA	NA	NA	0.123801	0.798131	0.0665365	0.849271	0.0572642	-0.05114	211.076	57.1201	61	57	0.566667	81	17205	NA	NA	NA	NA	NA	1.7	5.9	3.5	6.7	2	0.8	0.7	1.5	0.8	1.1	0	121	235	114	94.2149
EE1DCD2B8C	YK284	75798_3	75702_1	F	HIGH FAT	2020-08-24	3	11	NA	NA	NA	NA	NA	NA	0.159066	0.743688	0.0948	0.818453	0.064266	-0.0747657	177.862	50.4724	57	57	0.266667	86	14767.5	NA	NA	NA	NA	NA	1.7	4.8	2.4	6.1	1.6	0.6	0.6	1.2	0.8	1.2	0	119	206	87	73.1092
EE1DCD2B8D	YK267	75891_3	75866_1	M	HIGH FAT	2020-08-16	2	8	NA	NA	NA	NA	NA	NA	0.145038	0.785695	0.0701754	0.834893	0.0748627	-0.0491975	323.028	92.6173	66	49	1.8	97	18397.5	NA	NA	NA	NA	NA	1.9	8.2	10	5.8	4	1	1	2	1.1	1.5	0	151	365	214	141.722
EE1DCD2B8E	YK274	75736_2	75800_1	F	LOW FAT	2020-08-17	4	12	NA	NA	NA	NA	NA	NA	0.0868812	0.842574	0.0551887	0.852264	0.0316925	-0.00968989	200	88.3994	47	52	0.1	101	17527.5	NA	NA	NA	NA	NA	1.8	6.2	1.9	4.7	1.7	0.7	0.7	1.4	0.9	1.2	0	103	227	124	120.388
EE1DCD2B90	YK232	75953_3	75759_2	F	LOW FAT	2020-07-12	1	12	NA	NA	NA	NA	NA	NA	0.0432796	0.869086	NA	NA	NA	NA	NA	NA	72	71	0.166667	90	15982.5	NA	NA	NA	NA	NA	1.6	5.4	1.1	2	1	0.7	0.7	1.4	0.9	1	0	95	207	112	117.895
EE1DCD2B91	YK286	75896_4	75756_2	F	HIGH FAT	2020-08-24	3	10	NA	NA	NA	NA	NA	NA	0.0767254	0.827489	0.0659823	0.834945	0.0107431	-0.00745583	74.8076	48.9887	66	52	0.366667	90	15712.5	NA	NA	NA	NA	NA	1.9	5.6	2.6	5.1	1.4	0.7	0.8	1.5	1	1.3	0	140	234	94	67.1429
EE1DCD2B93	YK241	75230_1	75204_1	M	HIGH FAT	2020-07-18	5	10	NA	NA	NA	NA	NA	NA	0.203443	0.737329	0.098918	0.806021	0.104525	-0.068692	393.172	119.355	94	73	5.1	117	27390	NA	NA	NA	NA	NA	2	14	16.2	NA	8.1	1.2	1.2	2.4	1.2	1.6	0	171	476	305	178.363
EE1DCD2B94	YK249	75771_3	75711_1	M	HIGH FAT	2020-07-19	2	3	NA	NA	NA	NA	NA	NA	0.147352	0.797945	0.0731337	0.843932	0.0742179	-0.0459869	340.366	106.653	71	74	1.9	115	21045	NA	NA	NA	NA	NA	2.1	9.2	8.5	7.9	5.6	1.1	1.1	2.2	1.2	1.8	0	150	389	239	159.333
EE1DCD2B95	YK264	75756_3	75701_1	F	HIGH FAT	2020-07-26	2	13	NA	NA	NA	NA	NA	NA	0.0463801	0.875656	0.0507752	0.843721	-0.0043951	0.0319352	56.4885	77.8023	57	52	0.466667	83	18727.5	NA	NA	NA	NA	NA	1.7	5.8	1.2	2.4	1.1	0.9	0.9	1.8	0.8	0.7	0	118	251	133	112.712
EE1DCD2B97	YK253	75749_3	75834_1	M	HIGH FAT	2020-07-25	2	13	NA	NA	NA	NA	NA	NA	0.196879	0.733319	0.0995798	0.811639	0.0972991	-0.0783195	291.266	78.8028	111	NA	NA	NA	NA	NA	NA	NA	NA	NA	NA	NA	NA	NA	NA	NA	NA	NA	NA	NA	0	215	NA	NA	NA
EE1DCD2B98	YK244	75143_2	75170_1	F	LOW FAT	2020-07-19	6	14	NA	NA	NA	NA	NA	NA	0.0892355	0.822339	0.0460504	0.860476	0.0431851	-0.0381367	254.988	75.0741	62	67	0.533333	93	17107.5	NA	NA	NA	NA	NA	1.6	8.75	2.7	3	0.5	0.9	0.8	1.7	1	1.8	0	113	244	131	115.929
EE1DCD2B99	YK243	75143_2	75170_1	M	HIGH FAT	2020-07-19	6	14	NA	NA	NA	NA	NA	NA	0.206051	0.73231	0.0734921	0.752945	0.132559	-0.0206352	518.599	114.588	90	60	2.1	120	22042.5	NA	NA	NA	NA	NA	1.9	12	13.5	13	5.8	1.3	1.3	2.6	1.3	1.8	0	152	428	276	181.579
EE1DCD2B9C	YK275	75806_3	75823_1	M	HIGH FAT	2020-08-17	3	13	NA	NA	NA	NA	NA	NA	0.149783	0.781215	0.0551214	0.845276	0.094662	-0.0640612	537.044	116.67	82	74	1.5	92	15487.5	NA	NA	NA	NA	NA	2	9.6	7.1	6.9	3.3	1.1	1.1	2.2	1.2	1.5	0	134	379	245	182.836
EE1DCD2B9D	YK230	75135_2	75086_1	F	LOW FAT	2020-07-11	5	11	NA	NA	NA	NA	NA	NA	0.0486538	0.874054	NA	NA	NA	NA	NA	NA	75	76	0.2	54	14895	NA	NA	NA	NA	NA	1.9	7	1	3.2	1.4	0.7	0.6	1.3	1	1.2	0	117	229	112	95.7265
EE1DCD2B9E	YK313	75798_4	75800_2	M	HIGH FAT	2020-09-19	4	10	NA	NA	NA	NA	NA	NA	0.186267	0.748067	0.0805921	0.83682	0.105675	-0.0887535	508.218	135.247	87	69	2.5	99	13777.5	NA	NA	NA	NA	NA	2	10	14.3	10	4.9	1.1	1.2	2.3	1.2	1.8	0	139	417	278	200
EE1DCD2B9F	YK257	75828_3	75826_1	M	LOW FAT	2020-07-26	2	12	NA	NA	NA	NA	NA	NA	0.135565	0.790756	0.0523689	0.853046	0.0831958	-0.0622898	380.937	72.2206	88	74	1.4	90	15307.5	NA	NA	NA	NA	NA	2.2	9.9	7.3	6.5	3.6	1	1	2	1.1	1.6	0	184	379	195	105.978
EE1DCD2BA0	YK246	75762_3	75820_1	F	HIGH FAT	2020-07-19	2	12	NA	NA	NA	NA	NA	NA	0.126275	0.784721	0.0674555	0.835038	0.058819	-0.0503172	215.805	58.5367	67	57	0.766667	93	16807.5	NA	NA	NA	NA	NA	1.8	6.6	3.5	5.9	2.3	0.8	0.8	1.6	0.8	1.7	0	126	233	107	84.9206
EE1DCD2BA1	YK268	75891_3	75866_1	F	LOW FAT	2020-08-16	2	8	NA	NA	NA	NA	NA	NA	0.0873071	0.821248	0.0398667	0.852507	0.0474404	-0.0312587	255.652	56.4453	62	47	0.766667	90	14775	NA	NA	NA	NA	NA	1.8	5.9	2	3.8	2.1	0.6	0.7	1.3	0.7	0.9	0	119	233	114	95.7983
EE1DCD2BA2	YK250	75771_3	75711_1	F	LOW FAT	2020-07-19	2	3	NA	NA	NA	NA	NA	NA	0.136291	0.776201	0.087541	0.801175	0.0487503	-0.0249737	183.302	76.2951	66	60	0.766667	99	15870	NA	NA	NA	NA	NA	1.8	8.4	2.9	7.1	2.7	0.8	0.8	1.6	0.8	1.3	0	121	244	123	101.653
EE1DCD2BA3	YK276	75806_3	75823_1	F	LOW FAT	2020-08-17	3	13	NA	NA	NA	NA	NA	NA	0.089984	0.821282	0.0537815	0.846583	0.0362025	-0.0253006	192.448	69.5662	83	71	1	87	13440	NA	NA	NA	NA	NA	1.9	6.2	1.9	4.5	1.8	0.8	0.8	1.6	0.9	1.2	0	114	221	107	93.8596
EE1DCD2BA6	YK296	75816_3	75680_1	F	HIGH FAT	2020-08-29	3	10	NA	NA	NA	NA	NA	NA	0.136082	0.794316	0.0734839	0.844409	0.0625985	-0.0500925	199.883	52.329	30	NA	0.633333	82	15607.5	NA	NA	NA	NA	NA	2	6.3	3.1	6.7	2	0.9	0.9	1.8	0.9	1.7	0	148	256	108	72.973
EE1DCD2BA7	YK314	75798_4	75800_2	F	LOW FAT	2020-09-19	4	10	NA	NA	NA	NA	NA	NA	0.0733122	0.827954	0.0695098	0.836111	0.00380243	-0.00815752	63.3756	53.3907	39	50	0.4	90	15547.5	NA	NA	NA	NA	NA	1.7	4.7	1.2	2.3	1.4	0.6	0.6	1.2	0.9	1	0	102	203	101	99.0196
EE1DCD2BA8	YK293	75924_2	75742_1	M	LOW FAT	2020-08-29	3	14	NA	NA	NA	NA	NA	NA	0.158649	0.790667	0.0566501	0.869585	0.101999	-0.0789187	429.45	71.8972	121	NA	1.4	89	19140	NA	NA	NA	NA	NA	2	10.8	10.3	7.4	4.1	1.1	1.2	2.3	1.4	1.7	0	190	384	194	102.105
EE1DCD2BA9	YK270	75752_3	75805_1	F	HIGH FAT	2020-08-16	3	8	NA	NA	NA	NA	NA	NA	0.0991204	0.810679	0.0622739	0.833566	0.0368465	-0.0228869	166.515	62.8445	63	70	0.533333	114	17902.5	NA	NA	NA	NA	NA	1.9	6.7	2.2	5.3	2	0.9	0.8	1.7	1	1.5	0	124	234	110	88.7097
EE1DCD2BAB	YK271	75830_3	75811_2	M	LOW FAT	2020-08-16	3	3	NA	NA	NA	NA	NA	NA	0.169373	0.759087	0.0555062	0.84037	0.113867	-0.0812835	584.875	102.735	83	72	2.1	81	14542.5	NA	NA	NA	NA	NA	1.9	7.8	8.9	4.5	3.5	0.9	0.8	1.7	0.9	1.5	0	125	329	204	163.2
EE1DCD2BAC	YK237	75953_4	75939_2	M	LOW FAT	2020-07-12	1	8	NA	NA	NA	NA	NA	NA	0.21726	0.71953	NA	NA	NA	NA	NA	NA	134	111	2.3	110	16747.5	NA	NA	NA	NA	NA	2	14.6	14.7	16.9	9.5	1.4	1.4	2.8	1.5	1.5	0	160	456	296	185
EE1DCD2BAE	YK234	75922_2	75921_1	F	HIGH FAT	2020-07-12	1	11	NA	NA	NA	NA	NA	NA	0.0661563	0.83311	NA	NA	NA	NA	NA	NA	60	61	0.616	101	16365	NA	NA	NA	NA	NA	1.8	6.2	0.8	2.2	0.6	0.8	0.8	1.6	0.9	1.3	0	121	213	92	76.0331
EE1DCD2BB0	YK254	75749_3	75834_1	F	LOW FAT	2020-07-25	2	13	NA	NA	NA	NA	NA	NA	0.0593928	0.8627	0.0465143	0.861962	0.0128785	0.000738354	88.2473	47.5549	81	88	NA	98	17167.5	NA	NA	NA	NA	NA	1.9	8.3	2.2	5.3	1.9	1.1	1	2.1	0.8	1.5	0	163	278	115	70.5521
EE1DCD2BB1	YK279	75754_4	75694_1	M	HIGH FAT	2020-08-23	3	10	NA	NA	NA	NA	NA	NA	0.185985	0.729609	0.12521	0.802297	0.0607745	-0.0726881	191.054	78.1933	72	NA	NA	NA	NA	NA	NA	NA	NA	NA	NA	NA	NA	NA	NA	NA	NA	NA	NA	NA	0	199	NA	NA	NA
EE1DCD2BB2	YK242	75230_1	75204_1	F	LOW FAT	2020-07-18	5	10	NA	NA	NA	NA	NA	NA	0.0626522	0.851304	0.068951	0.841748	-0.00629888	0.0095561	46.146	62.6651	74	71	0.466667	99	14685	NA	NA	NA	NA	NA	1.8	6.9	1.5	2.8	1.6	0.8	0.8	1.6	0.9	1.1	0	136	241	105	77.2059
EE1DCD2BB3	YK262	75744_2	75811_1	F	HIGH FAT	2020-07-26	2	14	NA	NA	NA	NA	NA	NA	0.153765	0.773512	0.081784	0.809249	0.0719808	-0.0357369	196.584	50.7803	57	45	0.3	91	20565	NA	NA	NA	NA	NA	1.7	5.8	3.7	6.9	2.2	0.8	0.8	1.6	0.9	1.3	0	138	233	95	68.8406
EE1DCD2BB4	YK299	75799_4	75776_2	M	HIGH FAT	2020-08-29	4	6	NA	NA	NA	NA	NA	NA	0.156988	0.784314	0.0697934	0.855041	0.0871948	-0.0707276	295.027	61.0929	68	NA	0.9	95	16102.5	NA	NA	NA	NA	NA	2.1	11.2	9.9	10.4	6.1	1.3	1.3	2.6	1.4	2.3	0	220	450	230	104.545
EE1DCD2BB5	YK260	75701_2	75798_1	F	HIGH FAT	2020-07-26	2	12	NA	NA	NA	NA	NA	NA	0.0926037	0.838126	0.060939	0.84439	0.0316648	-0.00626378	149.345	62.8673	60	54	NA	73	16327.5	NA	NA	NA	NA	NA	1.9	5.1	1.3	3.5	1.2	0.7	0.8	1.5	0.9	1.1	0	130	229	99	76.1538
EE1DCD2BB6	YK245	75762_3	75820_1	M	LOW FAT	2020-07-19	2	12	NA	NA	NA	NA	NA	NA	0.183135	0.754715	0.03501	0.879521	0.148125	-0.124806	1109.06	98.3388	124	81	1.4	104	17542.5	NA	NA	NA	NA	NA	2	11.4	10.8	8.8	5.3	1.2	1.2	2.4	1.3	2	0	156	405	249	159.615
EE1DCD2BB7	YK265	75759_3	75824_2	M	HIGH FAT	2020-08-15	3	8	NA	NA	NA	NA	NA	NA	0.257033	0.679446	0.0936093	0.81724	0.163424	-0.137794	583.829	107.053	81	73	4	134	19192.5	NA	NA	NA	NA	NA	2	10.6	13.9	13.8	6.6	1.1	1.1	2.2	1.1	1.6	0	141	417	276	195.745
EE1DCD2BBA	YK251	75740_2	75775_1	M	HIGH FAT	2020-07-20	2	8	NA	NA	NA	NA	NA	NA	0.113813	0.825889	0.0643434	0.847919	0.0494696	-0.02203	332.025	137.897	95	78	3	96	17325	NA	NA	NA	NA	NA	2	11.5	8.1	11.4	4.2	1.5	1.5	3	1.2	2.1	0	144	423	279	193.75
EE1DCD2BBB	YK240	75700_2	75714_1	F	HIGH FAT	2020-07-13	2	8	NA	NA	NA	NA	NA	NA	0.0429072	0.8521	NA	NA	NA	NA	NA	NA	66	66	0.266667	77	16470	NA	NA	NA	NA	NA	1.9	6.6	1.5	2.9	1.4	0.7	0.7	1.4	0.9	1.1	0	114	241	127	111.404
EE1DCD2BBC	YK263	75756_3	75701_1	M	LOW FAT	2020-07-26	2	13	NA	NA	NA	NA	NA	NA	0.0784808	0.85689	0.0324121	0.887739	0.0460687	-0.0308486	353.85	80.9238	75	67	1	87	16102.5	NA	NA	NA	NA	NA	1.9	10.2	6.1	5	2.7	1.2	1.1	2.3	1	1.2	0	184	388	204	110.87
EE1DCD2BBD	YK285	75896_4	75756_2	M	LOW FAT	2020-08-24	3	10	NA	NA	NA	NA	NA	NA	0.0855139	0.845952	0.0566186	0.870096	0.0288953	-0.0241444	170.846	74.3508	97	71	0.9	89	16582.5	NA	NA	NA	NA	NA	2.1	11.1	6.9	5.4	2.8	1.3	1.2	2.5	1.3	1.9	0	197	396	199	101.015
EE1DCD2BBE	YK233	75922_2	75921_1	M	LOW FAT	2020-07-12	1	11	NA	NA	NA	NA	NA	NA	0.138841	0.785588	NA	NA	NA	NA	NA	NA	91	77	2.4	81	16927.5	NA	NA	NA	NA	NA	2.1	11.5	9.8	6	4.1	1.1	1.1	2.2	1.2	1.3	0	156	400	244	156.41
EE1DCD2BBF	YK238	75953_4	75939_2	F	HIGH FAT	2020-07-12	1	8	NA	NA	NA	NA	NA	NA	0.201727	0.733478	NA	NA	NA	NA	NA	NA	72	70	0.0775	117	19755	NA	NA	NA	NA	NA	1.6	8.6	6.2	13.6	5	1	1	2	1	1.2	0	128	304	176	137.5
EE1DCD2BC0	YK273	75736_2	75800_1	M	HIGH FAT	2020-08-17	4	12	NA	NA	NA	NA	NA	NA	0.138963	0.799815	0.0622055	0.840802	0.0767574	-0.0409872	504.674	157.482	80	66	2.6	106	20520	NA	NA	NA	NA	NA	1.9	9.5	8	7.6	3.9	1.2	1.1	2.3	1.2	1.99	0	117	391	274	234.188
EE1DCD2BC1	YK315	75694_2	75757_1	M	HIGH FAT	2020-09-19	5	8	NA	NA	NA	NA	NA	NA	0.259994	0.688579	0.0831841	0.837828	0.17681	-0.149249	724.143	116.71	106	86	NA	102	20370	NA	NA	NA	NA	NA	2.1	13.1	23.8	18.5	13.5	1.5	1.6	3.1	1.4	1.6	0	175	547	372	212.571
EE1DCD2BC2	YK252	75740_2	75775_1	F	LOW FAT	2020-07-20	2	8	NA	NA	NA	NA	NA	NA	0.0671795	0.838365	0.0683473	0.814958	-0.00116785	0.0234074	71.8033	79.8103	65	65	0.633333	79	12375	NA	NA	NA	NA	NA	1.7	6.7	1.6	3	1.2	0.8	0.9	1.7	0.9	1.1	0	109	225	116	106.422
EE1DCD2BC3	YK261	75744_2	75811_1	M	LOW FAT	2020-07-26	2	14	NA	NA	NA	NA	NA	NA	0.153865	0.788317	0.0615298	0.85525	0.0923353	-0.0669321	407.38	87.0196	91	73	1.5	94	18262.5	NA	NA	NA	NA	NA	2.1	11.2	11	7.8	4.2	1.1	1.3	2.4	1.1	1.6	0	193	426	233	120.725
EE1DCD2BC4	YK288	75775_4	75810_2	F	HIGH FAT	2020-08-24	3	13	NA	NA	NA	NA	NA	NA	0.0909772	0.805087	0.0704922	0.836242	0.0204851	-0.0311546	115.678	60.8882	72	77	0.366667	86	15435	NA	NA	NA	NA	NA	1.9	7	2.5	4.3	1.2	0.9	0.9	1.8	0.9	1.1	0	139	254	115	82.7338
EE1DCD2BC5	YK281	75755_3	75896_1	M	LOW FAT	2020-08-24	3	10	NA	NA	NA	NA	NA	NA	0.190437	0.745923	0.0561979	0.866806	0.13424	-0.120883	572.444	70.7639	84	74	1.7	94	18270	NA	NA	NA	NA	NA	2	10.5	11.6	6.6	6.5	1.1	1	2.1	1.3	1.4	0	183	394	211	115.301
EE1DCD2BC8	YK295	75816_3	75680_1	M	LOW FAT	2020-08-29	3	10	NA	NA	NA	NA	NA	NA	0.124477	0.817854	0.0290047	0.908152	0.095472	-0.0902977	670.861	61.7611	121	NA	1.2	87	13957.5	NA	NA	NA	NA	NA	2.1	10.7	8.4	8.2	3.5	1.2	1.1	2.3	1.2	1.9	0	206	396	190	92.233
EE1DCD2BC9	YK300	75799_4	75776_2	F	LOW FAT	2020-08-29	4	6	NA	NA	NA	NA	NA	NA	0.0763713	0.834909	0.0397619	0.860974	0.0366094	-0.0260654	195.591	49.237	60	NA	0.433333	67	15180	NA	NA	NA	NA	NA	2	7.3	1.7	4.7	2.4	0.8	0.9	1.7	0.9	1.6	0	147	272	125	85.034
EE1DCD2BCA	YK256	75753_3	75830_2	F	LOW FAT	2020-07-26	1	5	NA	NA	NA	NA	NA	NA	0.0329234	0.869412	0.032459	0.842978	0.000464335	0.0264336	55.4714	58.0851	56	67	0.1	75	11055	NA	NA	NA	NA	NA	2	5.2	0.4	0.9	0.4	0.7	0.7	1.4	0.8	1.2	0	119	210	91	76.4706
EE1DCD2BCC	YK266	75759_3	75824_2	F	LOW FAT	2020-08-15	3	8	NA	NA	NA	NA	NA	NA	0.134133	0.78917	0.0716548	0.826312	0.0624779	-0.0371416	193.402	49.6924	68	82	0.366667	77	15892.5	NA	NA	NA	NA	NA	1.9	6.4	2.7	7.2	1.7	0.8	0.8	1.6	0.8	1.2	0	132	235	103	78.0303
EE1DCD2BCF	YK255	75753_3	75830_2	M	HIGH FAT	2020-07-26	1	5	NA	NA	NA	NA	NA	NA	0.11543	0.826017	0.0732138	0.842451	0.0422166	-0.0164342	201.184	87.3048	83	72	1.8	86	16035	NA	NA	NA	NA	NA	2.2	10.7	8.1	7.1	3.2	1.2	1.2	2.4	1.3	1.9	0	202	422	220	108.911
EE1DCD2BD0	YK282	75755_3	75896_1	F	HIGH FAT	2020-08-24	3	10	NA	NA	NA	NA	NA	NA	0.0496547	0.866697	0.0746711	0.836075	-0.0250164	0.0306221	-2.87812	51.402	54	52	0.5	92	17932.5	NA	NA	NA	NA	NA	1.9	6.3	1.2	2.5	1.2	0.9	0.9	1.8	1	1.2	0	148	239	91	61.4865
EE1DCD2BD1	YK298	75756_3	75701_1	F	LOW FAT	2020-08-29	3	13	NA	NA	NA	NA	NA	NA	0.0933333	0.833823	0.0454409	0.860817	0.0478925	-0.0269946	188.878	36.2346	60	NA	0.6975	86	12960	NA	NA	NA	NA	NA	1.8	5.8	2.1	4.2	1.8	0.7	0.7	1.4	0.8	1.2	0	151	224	73	48.3444
EE1DCD2BD4	YK326	75834_3	75749_1	F	LOW FAT	2020-09-26	3	10	NA	NA	NA	NA	NA	NA	0.0341312	0.872766	0.0466949	0.852062	-0.0125637	0.0207038	16.4549	63.1933	67	NA	0.4	95	15217.5	62	45	73	32	0	1.8	5.2	0.8	1.7	0.8	0.7	0.8	1.5	0.8	1.2	0	116	194	78	67.2414
EE1DCD2BD5	YK401	76080_2	76060_1	M	LOW FAT	2020-11-08	2	13	NA	NA	NA	NA	NA	NA	0.120749	0.805727	0.0428571	0.868711	0.0778923	-0.0629844	605.556	132.264	61	49	1.5	93	NA	98	161	57	30	0	1.9	8	6.1	4.8	2.9	0.8	0.9	1.7	1.1	1.3	0	134	302	168	125.373
EE1DCD2BD6	YK348	75703_2	75822_1	F	LOW FAT	2020-10-05	5	8	NA	NA	NA	NA	NA	NA	0.0993333	0.806667	0.0585645	0.846253	0.0407689	-0.0395864	178.563	56.551	73	74	0.55	88	15037.5	60	66	46	29	0	2	7.1	3.1	6.2	2.4	0.8	0.8	1.6	1	1.2	0	130	227	97	74.6154
EE1DCD2BD7	YK338	75802_2	75822_2	F	LOW FAT	2020-10-04	5	11	NA	NA	NA	NA	NA	NA	0.0447302	0.862286	0.0405067	0.851627	0.00422349	0.010659	85.5168	70.1027	86	80	0.2	84	14055	75	76	64	39	0	1.8	6.3	1.1	3.1	1.6	0.8	0.8	1.6	1	1.3	0	121	213	92	76.0331
EE1DCD2BD8	YK396	75810_3	75738_1	F	LOW FAT	2020-11-02	6	11	NA	NA	NA	NA	NA	NA	0.0229167	0.895374	0.0491975	0.858056	-0.0262809	0.037318	0.0627353	124.157	91	80	1.1185	78	13950	65	53	73	30	0	1.8	7.4	4.8	2.5	NA	0.9	0.9	1.8	NA	NA	0	121	243	122	100.826
EE1DCD2BD9	YK327	75801_3	75809_1	M	HIGH FAT	2020-09-27	5	10	NA	NA	NA	NA	NA	NA	0.122314	0.814495	0.0669757	0.842185	0.0553381	-0.0276907	354.746	140.819	91	NA	1.2	91	15487.5	73	54	57	51	0	2	10.5	8.5	8.6	3.9	1.3	1.2	2.5	1.4	1.9	0	133	387	254	190.977
EE1DCD2BDA	YK336	75808_4	75804_2	F	HIGH FAT	2020-09-29	5	10	NA	NA	NA	NA	NA	NA	0.146282	0.788989	0.046307	0.863381	0.0999746	-0.0743921	529.518	82.1098	73	NA	0.35	88	15262.5	57	50	72	49	0	2	5.6	5.1	9.8	3	0.9	0.9	1.8	1	1.6	0	130	282	152	116.923
EE1DCD2BDB	YK347	75703_2	75822_1	M	HIGH FAT	2020-10-05	5	8	NA	NA	NA	NA	NA	NA	0.244421	0.680504	0.077047	0.83443	0.167374	-0.153926	604.733	81.1684	88	51	2.6	176	34230	111	138	55	40	0	1.9	9.1	13.9	7.2	5.9	0.9	1	1.9	1.6	1.4	0	125	348	223	178.4
EE1DCD2BDC	YK408	75714_2	75754_1	F	HIGH FAT	2020-11-09	6	12	NA	NA	NA	NA	NA	NA	0.13203	0.78317	0.0743464	0.822582	0.0576832	-0.0394113	291.736	110.019	63	50	0.2	77	NA	85	57	59	40	0	1.8	5.8	3.3	6.1	2	0.8	0.7	1.5	0.8	1.7	0	114	225	111	97.3684
EE1DCD2BDD	YK445	76115_2	76240_1	M	HIGH FAT	2020-12-05	3	10	NA	NA	NA	NA	NA	NA	0.139274	0.799989	0.0368391	0.854253	0.102435	-0.0542634	933.151	155.917	53	44	2.3	106	16612.5	83	104	54	69	0	1.9	7.7	8.1	6.5	2.5	1	1.1	2.1	1.1	1.4	0	131	322	191	145.802
EE1DCD2BDE	YK351	76056_2	76280_1	M	HIGH FAT	2020-10-10	1	10	NA	NA	NA	NA	NA	NA	0.162245	0.776273	0.0545625	0.852875	0.107682	-0.076602	639.672	126.408	94	85	4	88	21382.5	77	100	99	85	0	1.85	11.5	11.7	12.4	8.55	1.15	1.15	2.3	1.5	1.45	0	144	414	270	187.5
EE1DCD2BDF	YK340	75823_3	75803_1	F	LOW FAT	2020-10-04	5	7	NA	NA	NA	NA	NA	NA	0.0363113	0.87291	0.0284824	0.869729	0.00782895	0.00318132	104.186	60.7484	57	84	0.75	79	14332.5	77	48	82	38	0	1.9	5.4	1.2	2.4	1.1	0.7	0.7	1.4	0.9	0.7	0	124	214	90	72.5806
EE1DCD2BE0	YK358	76163_2	76217_1	F	HIGH FAT	2020-10-11	1	11	NA	NA	NA	NA	NA	NA	0.0385741	0.865352	0.0594895	0.834625	-0.0209154	0.0307272	5.14891	68.1323	48	42	0.2	79	18525	80	60	77	58	0	1.7	5.45	0.95	1.8	0.8	0.65	0.6	1.25	0.6	0.95	0	101	186	85	84.1584
EE1DCD2BE1	YK339	75823_3	75803_1	M	HIGH FAT	2020-10-04	5	7	NA	NA	NA	NA	NA	NA	NA	NA	0.0498824	0.852529	NA	NA	NA	NA	NA	NA	NA	NA	NA	NA	NA	NA	NA	NA	NA	NA	NA	NA	NA	NA	NA	NA	NA	NA	0	155	NA	NA	NA
EE1DCD2BE2	YK350	76059_2	76224_1	F	LOW FAT	2020-10-10	1	10	NA	NA	NA	NA	NA	NA	0.133412	0.795708	0.0691954	0.835603	0.0642165	-0.0398959	252.367	74.0328	68	43	0.7	85	16972.5	90	65	58	25	0	1.8	6.4	3.3	6.8	2.3	0.7	0.6	1.3	0.8	1	0	112	215	103	91.9643
EE1DCD2BE3	YK344	75775_3	75825_1	F	HIGH FAT	2020-10-05	5	6	NA	NA	NA	NA	NA	NA	0.0947184	0.820868	0.0606767	0.843434	0.0340417	-0.022566	157.043	60.2561	57	49	0.5	92	13447.5	67	58	60	50	0	1.7	6.6	2.5	5.2	1.7	0.8	0.8	1.6	0.8	1.2	0	126	224	98	77.7778
EE1DCD2BE4	YK355	75750_4	75854_2	M	LOW FAT	2020-10-11	5	8	NA	NA	NA	NA	NA	NA	0.168198	0.772919	0.0564979	0.858776	0.1117	-0.0858576	642.382	124.436	119	91	1.7	98	20115	156	195	48	30	0	2.2	13.7	10.6	8.2	5.5	1.3	1.3	2.6	1.1	1.4	0	147	400	253	172.109
EE1DCD2BE5	YK448	76167_2	76187_1	F	LOW FAT	2020-12-06	3	14	NA	NA	NA	NA	NA	NA	0.0562338	0.862193	0.0394253	0.864425	0.0168085	-0.00223193	184.038	98.6238	80	75	0.3	97	18217.5	70	54	57	30	0	1.7	5.7	2.1	3.5	1.3	0.7	0.8	1.5	1	1.2	0	128	238	110	85.9375
EE1DCD2BE7	YK451	76464_2	76454_1	M	LOW FAT	2020-12-06	1	8	NA	NA	NA	NA	NA	NA	0.14495	0.790352	0.0572599	0.848305	0.0876904	-0.0579528	691.613	191.349	93	74	1.8	91	17197.5	83	109	51	33	0	2.1	10.4	9.4	6.1	3.9	1.2	1.3	2.5	1.2	1.8	0	138	377	239	173.188
EE1DCD2BE9	YK405	76182_2	76270_1	M	LOW FAT	2020-11-09	2	14	NA	NA	NA	NA	NA	NA	0.150846	0.779185	0.0489667	0.859067	0.10188	-0.0798819	895.031	192.965	75	56	1.1	85	NA	61	96	61	42	0	1.9	8.4	7.3	8.8	4	0.9	1	1.9	0.9	1.5	0	115	322	207	180
EE1DCD2BEA	YK360	76113_2	76147_1	F	HIGH FAT	2020-10-11	1	11	NA	NA	NA	NA	NA	NA	0.0349267	0.865165	0.0342453	0.844277	0.000681457	0.0208881	75.1148	75.9461	62	50	NA	76	17280	60	51	80	45	0	1.8	5.2	0.55	1.6	0.7	0.7	0.75	1.45	0.65	1	0	102	185	83	81.3725
EE1DCD2BEB	YK322	75752_4	75749_2	F	LOW FAT	2020-09-19	5	10	NA	NA	NA	NA	NA	NA	0.11257	0.800166	0.0916944	0.802	0.020876	-0.00183416	105.635	67.1169	60	72	0.566667	106	18322.5	NA	NA	NA	NA	NA	1.9	5.9	2.3	5	2	0.8	0.8	1.6	0.9	1.1	0	122	213	91	74.5902
EE1DCD2BEC	YK334	75820_3	75731_1	F	HIGH FAT	2020-09-29	3	11	NA	NA	NA	NA	NA	NA	0.0718841	0.842576	0.0386377	0.858725	0.0332464	-0.0161481	234.884	76.6151	60	NA	0.55	95	18255	82	47	54	47	0	1.8	4.9	1.8	4.1	1.4	0.7	0.7	1.4	0.7	1	0	107	210	103	96.2617
EE1DCD2BED	YK359	76113_2	76147_1	M	LOW FAT	2020-10-11	1	11	NA	NA	NA	NA	NA	NA	0.0762403	0.858585	0.0375591	0.884751	0.0386813	-0.0261654	449.825	162.856	86	83	1	86	16305	83	92	65	44	0	2.1	9.9	5.8	4.6	2.5	1	0.9	1.9	0.9	1.6	0	125	357	232	185.6
EE1DCD2BEE	YK419	76228_2	76113_1	M	HIGH FAT	2020-11-16	2	8	NA	NA	NA	NA	NA	NA	0.203458	0.731564	0.0720448	0.83437	0.131413	-0.102805	789.93	176.298	66	46	2.1	85	15037.5	85	147	55	72	0	2	9.2	14	8.4	4.7	1	1	2	1.1	1.5	0	136	380	244	179.412
EE1DCD2BEF	YK400	76432_2	76425_1	F	LOW FAT	2020-11-07	1	11	NA	NA	NA	NA	NA	NA	0.0854209	0.834428	0.0408974	0.857276	0.0445234	-0.022848	297.649	85.3105	70	66	0.25	83	NA	64	52	70	33	0	1.9	5.2	2.8	2.6	1.6	0.6	0.7	1.3	0.7	0.8	0	116	201	85	73.2759
EE1DCD2BF1	YK393	76055_2	76241_1	M	HIGH FAT	2020-11-02	2	12	NA	NA	NA	NA	NA	NA	0.130958	0.811544	0.0522392	0.858931	0.0787189	-0.0473874	705.65	203.644	86	68	2.6	104	15810	68	96	50	46	0	2	9.1	12.5	7.6	NA	1.2	1.3	2.5	NA	NA	0	158	428	270	170.886
EE1DCD2BF3	YK390	76040_2	76226_1	F	HIGH FAT	2020-11-01	2	10	NA	NA	NA	NA	NA	NA	0.0812273	0.843138	0.060283	0.853019	0.0209443	-0.00988079	203.808	122.86	63	50	0.55	83	15307.5	NA	NA	NA	NA	NA	2	6.6	3	4.5	NA	0.8	0.7	1.5	NA	NA	0	115	243	128	111.304
EE1DCD2BF4	YK446	76115_2	76240_1	F	LOW FAT	2020-12-05	3	10	NA	NA	NA	NA	NA	NA	0.0400317	0.875651	0.0317845	0.884108	0.00824723	-0.00845695	167.161	110.092	55	62	0.466667	97	14932.5	55	47	64	30	0	1.8	5.6	1.4	3.8	1.5	0.7	0.7	1.4	0.7	1.5	0	109	221	112	102.752
EE1DCD2BF5	YK410	76160_2	76062_1	F	LOW FAT	2020-11-14	2	9	NA	NA	NA	NA	NA	NA	0.0679911	0.859658	0.0536697	0.870979	0.0143213	-0.0113209	160.342	102.833	82	70	0.433333	76	14745	65	89	57	35	0	1.8	6.3	2.1	3.3	1.7	0.8	0.8	1.6	1	1.3	0	121	239	118	97.5207
EE1DCD2BF6	YK319	75797_3	75685_1	M	LOW FAT	2020-09-19	4	11	NA	NA	NA	NA	NA	NA	0.0562973	0.880322	0.0360628	0.881087	0.0202345	-0.000764987	298.192	154.851	104	78	1	83	17580	NA	NA	NA	NA	NA	2.1	10.9	4.3	4	2.5	1.1	1.1	2.2	1.1	1.4	0	132	381	249	188.636
EE1DCD2BF7	YK349	76059_2	76224_1	M	HIGH FAT	2020-10-10	1	10	NA	NA	NA	NA	NA	NA	0.243326	0.691985	0.115155	0.798295	0.128171	-0.106309	452.827	126.787	100	76	3.8	120	27105	109	229	61	64	0	1.95	11.95	17.3	17.75	9.85	1.2	1.15	2.35	1.1	1.45	0	149	450	301	202.013
EE1DCD2BF8	YK453	76109_2	76144_1	M	LOW FAT	2020-12-06	3	8	NA	NA	NA	NA	NA	NA	0.080981	0.856048	0.042906	0.851282	0.038075	0.00476557	464.608	200.82	90	72	0.7	95	17227.5	71	69	65	36	0	2	10.8	7.2	8	4	1.2	1.2	2.4	1.4	2.4	0	129	370	241	186.822
EE1DCD2BFA	YK412	76166_2	76195_1	F	LOW FAT	2020-11-14	2	9	NA	NA	NA	NA	NA	NA	0.0537862	0.868579	0.0511382	0.871436	0.00264795	-0.0028577	126.603	114.741	82	80	0.166667	66	13785	53	104	60	28	0	2	6.5	2.8	5.3	2.1	0.8	0.9	1.7	0.8	1	0	138	280	142	102.899
EE1DCD2BFB	YK389	76040_2	76226_1	M	LOW FAT	2020-11-01	2	10	NA	NA	NA	NA	NA	NA	0.141842	0.791977	0.0572222	0.868207	0.0846196	-0.0762304	596.69	156.383	104	88	2.2	88	17055	88	166	91	59	0	2.2	9.2	8.1	6.8	NA	1.2	1.2	2.4	NA	NA	0	155	374	219	141.29
EE1DCD2BFC	YK354	76092_2	76275_1	F	HIGH FAT	2020-10-10	1	9	NA	NA	NA	NA	NA	NA	0.0763736	0.833791	0.0491667	0.832644	0.027207	0.00114753	143.717	57.1128	49	40	0.366	93	15082.5	54	55	78	37	0	1.8	NA	1.1	3.05	1.3	0.55	0.6	1.15	0.65	1.1	0	110	186	76	69.0909
EE1DCD2BFD	YK335	75808_4	75804_2	M	LOW FAT	2020-09-29	5	10	NA	NA	NA	NA	NA	NA	0.175548	0.762978	0.0342337	0.882529	0.141314	-0.119551	1226.19	123.587	116	NA	2.7	97	18802.5	97	155	57	40	0	2.3	12.1	13.8	10	6.7	1.3	1.3	2.6	1.3	2.5	0	163	457	294	180.368
EE1DCD2BFE	YK484	76054_2	76182_1	F	LOW FAT	2020-12-27	4	11	NA	NA	NA	NA	NA	NA	0.0653363	0.848231	0.0618485	0.843697	0.00348777	0.00453402	118.961	108.387	75	80	0.433333	86	17970	70	54	67	28	0	1.8	7.1	2.1	2.9	1.2	0.9	0.9	1.8	0.8	1	0	119	232	113	94.958
EE1DCD2BFF	YK333	75820_3	75731_1	M	LOW FAT	2020-09-29	3	11	NA	NA	NA	NA	NA	NA	0.0810449	0.841693	0.0196063	0.871785	0.0614386	-0.030092	938.286	142.511	90	NA	1.1	99	16207.5	88	95	72	50	0	2	8.5	5.9	4.2	3.3	1.1	1.1	2.2	1	1.9	0	116	329	213	183.621
EE1DCD2C00	YK323	75841_2	75739_1	M	HIGH FAT	2020-09-19	4	11	NA	NA	NA	NA	NA	NA	0.111996	0.820841	0.0692889	0.826711	0.0427068	-0.00586969	232.97	104.537	71	58	2.3725	99	16290	NA	NA	NA	NA	NA	2	7.7	4.6	4.5	2.3	1	1	2	1	1.5	0	136	314	178	130.882
EE1DCD2C01	YK497	76339_3	76047_1	M	LOW FAT	2021-01-04	4	5	NA	NA	NA	NA	NA	NA	0.124509	0.808114	0.0582073	0.85465	0.0663015	-0.0465358	583.061	201.94	118	87	3.4	94	18442.5	82	212	60	48	0	2.1	12.4	7.1	7.4	4.3	1.1	1.1	2.2	1.2	1.7	0	145	392	247	170.345
EE1DCD2C02	YK391	75738_2	75828_1	M	LOW FAT	2020-11-01	6	5	NA	NA	NA	NA	NA	NA	0.126348	0.809956	0.06672	0.858347	0.0596275	-0.048391	469.624	183.842	116	98	1.8	91	14437.5	67	173	57	37	0	2.1	11.6	8	7.6	NA	1.4	1.3	2.7	NA	NA	0	143	392	249	174.126
EE1DCD2C03	YK406	76182_2	76270_1	F	HIGH FAT	2020-11-09	2	14	NA	NA	NA	NA	NA	NA	0.0962069	0.814353	0.0393939	0.857652	0.056813	-0.0432981	543.846	150.327	63	48	NA	80	NA	52	43	56	42	0	1.9	7.4	4.6	6.8	3.4	0.8	0.8	1.6	0.8	1.8	0	99	252	153	154.545
EE1DCD2C04	YK399	76432_2	76425_1	M	HIGH FAT	2020-11-07	1	11	NA	NA	NA	NA	NA	NA	0.15657	0.783149	0.040767	0.878437	0.115803	-0.0952874	1069.18	171.403	87	79	1.6	95	NA	83	58	62	38	0	2	8.5	9.9	7.6	5.7	1	1	2	1	1.7	0	132	360	228	172.727
EE1DCD2C05	YK455	76278_2	76159_1	M	LOW FAT	2020-12-07	2	3	NA	NA	NA	NA	NA	NA	0.192273	0.761176	0.0665333	0.854613	0.12574	-0.0934369	961.162	227.053	124	111	2.4115	99	20745	126	134	123	112	0	2.1	15.7	15.6	12.3	7	1.3	1.3	2.6	1.3	2.8	1	149	485	336	225.503
EE1DCD2C06	YK320	75797_3	75685_1	F	HIGH FAT	2020-09-19	4	11	NA	NA	NA	NA	NA	NA	0.0261421	0.88022	0.0338596	0.872661	-0.00771752	0.00755915	33.4197	74.3039	58	50	NA	86	14827.5	NA	NA	NA	NA	NA	2	5	1.4	2.6	1	0.6	0.6	1.2	0.7	1	0	110	216	106	96.3636
EE1DCD2C07	YK357	76163_2	76217_1	M	LOW FAT	2020-10-11	1	11	NA	NA	NA	NA	NA	NA	0.108044	0.829733	0.0263889	0.895718	0.0816556	-0.0659843	966.228	141.233	112	97	1.6	90	18742.5	94	125	55	31	0	2.1	11.1	8.2	7.7	3.6	1.2	1.3	2.5	1.3	1.6	0	141	383	242	171.631
EE1DCD2C08	YK456	76278_2	76159_1	F	HIGH FAT	2020-12-07	2	3	NA	NA	NA	NA	NA	NA	0.190906	0.73095	0.0775945	0.831684	0.113312	-0.100734	478.299	106.582	71	60	0.7	100	18562.5	51	66	57	25	0	1.8	7.3	4.5	7.8	3.2	0.8	0.7	1.5	0.9	1.8	0	110	238	128	116.364
EE1DCD2C09	YK321	75752_4	75749_2	M	HIGH FAT	2020-09-19	5	10	NA	NA	NA	NA	NA	NA	0.19989	0.736572	0.0884706	0.82051	0.111419	-0.0839375	463.52	123.897	80	88	3.5	134	21750	NA	NA	NA	NA	NA	2.1	12.8	13.1	13.3	6.5	1.2	1.3	2.5	1.3	1.6	0	158	440	282	178.481
EE1DCD2C0A	YK353	76092_2	76275_1	M	LOW FAT	2020-10-10	1	9	NA	NA	NA	NA	NA	NA	0.120095	0.827105	0.0298473	0.887888	0.0902479	-0.0607833	975.021	148.885	96	82	1.2	82	17355	90	100	58	31	0	2.1	9.8	6.8	5.9	3.5	1.1	1.1	2.2	1.1	1.7	0	126	361	235	186.508
EE1DCD2C0B	YK330	75821_3	75896_2	F	HIGH FAT	2020-09-27	5	9	NA	NA	NA	NA	NA	NA	0.0703687	0.848065	0.0532414	0.849839	0.0171273	-0.00177456	97.7979	49.3427	56	NA	0.55	95	16065	65	57	95	54	0	1.9	5.9	3	4.3	1.9	0.8	0.8	1.6	0.8	1.4	0	139	225	86	61.8705
EE1DCD2C0C	YK403	76114_2	76208_1	M	LOW FAT	2020-11-08	2	12	NA	NA	NA	NA	NA	NA	0.0855426	0.842626	0.0433013	0.868173	0.0422414	-0.0255471	553.442	221.036	94	86	0.7	85	NA	69	88	62	35	0	2	9.4	5.6	7.2	2.8	1	1.1	2.1	1.1	2.1	0	127	361	234	184.252
EE1DCD2C0D	YK388	76151_2	76157_1	F	LOW FAT	2020-11-01	1	5	NA	NA	NA	NA	NA	NA	0.098183	0.834824	0.0746133	0.85864	0.0235697	-0.0238165	168.442	98.3416	89	79	1	80	13710	52	63	58	31	0	1.8	7.4	2.6	7.7	NA	0.9	0.8	1.7	NA	NA	0	142	258	116	81.6901
EE1DCD2C0E	YK318	75811_3	75744_1	F	HIGH FAT	2020-09-19	4	15	NA	NA	NA	NA	NA	NA	0.14842	0.769052	0.059587	0.848732	0.0888332	-0.0796794	365.099	69.1957	47	36	0.5	99	20430	NA	NA	NA	NA	NA	1.8	5.6	4.1	5.8	1.9	0.8	0.8	1.6	0.8	1.2	0	104	216	112	107.692
EE1DCD2C0F	YK397	76159_2	76059_1	M	HIGH FAT	2020-11-07	2	8	NA	NA	NA	NA	NA	NA	0.2295	0.706425	0.0738243	0.837494	0.155676	-0.131068	832.622	153.05	82	72	1.8	88	NA	92	65	65	55	0	1.9	10.2	18.5	9.3	7.2	1.1	1.1	2.2	1.2	1.5	0	149	400	251	168.456
EE1DCD2C10	YK478	75822_3	75705_1	F	HIGH FAT	2020-12-21	7	9	53563	18745	34859	8093.5	7989.67	103.833	0.0514667	0.858519	0.0501124	0.853783	0.00135431	0.00473575	159.641	154.211	67	68	0.233333	97	18675	54	60	57	40	0	1.8	6.5	1.1	3.2	1	0.8	0.9	1.7	0.9	1.4	0	99	236	137	138.384
EE1DCD2C11	YK420	76228_2	76113_1	F	LOW FAT	2020-11-16	2	8	NA	NA	NA	NA	NA	NA	0.0169744	0.89465	0.0485455	0.867545	-0.0315711	0.0271041	-38.015	82.8111	69	80	0.2	79	14205	81	49	56	29	0	2.1	5.7	1.3	3.2	1.6	0.8	0.8	1.6	0.9	1.3	0	121	220	99	81.8182
EE1DCD2C12	YK452	76464_2	76454_1	F	HIGH FAT	2020-12-06	1	8	NA	NA	NA	NA	NA	NA	0.0997139	0.830944	0.0427393	0.870264	0.0569746	-0.0393198	438.224	120.27	71	60	0.233333	88	20062.5	73	44	83	66	0	1.9	5.8	4.2	6.4	2.2	0.8	0.8	1.6	1.2	1.3	0	115	248	133	115.652
EE1DCD2C13	YK346	75708_2	75842_1	F	LOW FAT	2020-10-05	4	9	NA	NA	NA	NA	NA	NA	0.131124	0.800902	0.0540104	0.852135	0.0771138	-0.0512335	383.655	87.241	73	53	0.55	92	15150	73	43	80	65	0	1.9	5.2	2.7	7.1	2.4	0.8	0.8	1.6	0.9	1.4	0	123	245	122	99.187
EE1DCD2C14	YK329	75821_3	75896_2	M	LOW FAT	2020-09-27	5	9	NA	NA	NA	NA	NA	NA	0.122944	0.817475	0.0370694	0.869709	0.0858748	-0.0522341	643.452	110.698	98	NA	1.2	84	13905	73	90	78	46	0	2.2	8.9	10.3	8.1	4.8	1.2	1.2	2.4	1.3	1.4	0	138	354	216	156.522
EE1DCD2C15	YK385	76324_2	76189_1	M	HIGH FAT	2020-10-31	1	13	NA	NA	NA	NA	NA	NA	0.157927	0.790138	0.0383196	0.870771	0.119607	-0.0806331	1296.48	207.466	85	75	2.1	93	13440	92	84	56	52	0	1.9	10.7	15	7.9	NA	1.2	1.2	2.4	NA	NA	0	149	408	259	173.826
EE1DCD2C16	YK450	76165_2	76203_1	F	HIGH FAT	2020-12-06	3	15	NA	NA	NA	NA	NA	NA	0.0258031	0.876097	0.0384192	0.873677	-0.0126161	0.00241974	33.6315	99.5201	52	46	0.466667	94	17715	68	57	80	37	0	1.8	5.1	1	1.7	1.1	0.6	0.6	1.2	0.7	1.3	0	113	205	92	81.4159
EE1DCD2C17	YK415	76213_1	76063_1	M	LOW FAT	2020-11-15	2	7	NA	NA	NA	NA	NA	NA	0.072794	0.868457	0.0351515	0.881303	0.0376424	-0.0128456	481.724	176.815	86	67	0.6	79	14505	62	105	62	34	0	2	8.9	6.2	4	3.2	1.1	1.1	2.2	1.2	1.5	0	122	345	223	182.787
EE1DCD2C18	YK386	76324_2	76189_1	F	LOW FAT	2020-10-31	1	13	NA	NA	NA	NA	NA	NA	0.0381031	0.877072	0.04	0.86957	-0.00189687	0.00750193	85.3943	96.3027	71	71	0.133333	72	16747.5	NA	NA	NA	NA	NA	1.7	5.3	0.9	1.9	NA	0.7	0.6	1.3	NA	NA	0	106	192	86	81.1321
EE1DCD2C19	YK404	76114_2	76208_1	F	HIGH FAT	2020-11-08	2	12	NA	NA	NA	NA	NA	NA	0.154249	0.759027	0.0676825	0.830159	0.0865664	-0.0711315	405.722	102.891	64	58	0.45	84	NA	55	59	59	40	0	1.9	5.6	3.8	6.9	2.6	0.8	0.8	1.6	0.9	1.2	0	118	228	110	93.2203
EE1DCD2C1A	YK342	75741_2	75799_1	F	HIGH FAT	2020-10-05	5	11	NA	NA	NA	NA	NA	NA	0.0685568	0.854355	0.0491847	0.861127	0.0193722	-0.00677205	161.726	86.2931	70	65	0.35	92	18922.5	75	60	59	58	0	1.9	6.9	1.9	4.5	1.9	NA	1.8	NA	1.1	1.8	0	130	264	134	103.077
EE1DCD2C1B	YK395	75810_3	75738_1	M	HIGH FAT	2020-11-02	6	11	NA	NA	NA	NA	NA	NA	0.0904261	0.834244	0.0448958	0.866875	0.0455302	-0.0326311	527.842	199.985	91	71	2.2	86	15750	86	77	60	51	0	2.1	11.7	7.5	7.6	NA	1.4	1.4	2.8	NA	NA	0	155	411	256	165.161
EE1DCD2C1C	YK325	75834_3	75749_1	M	HIGH FAT	2020-09-26	3	10	NA	NA	NA	NA	NA	NA	0.24283	0.700546	0.0852222	0.823963	0.157608	-0.123417	644.003	122.001	100	NA	4.163	117	20677.5	119	94	62	65	0	2.2	11.7	26.1	17.1	9.5	1.3	1.3	2.6	1.3	1.9	0	157	496	339	215.924
EE1DCD2C1D	YK418	76152_2	76115_1	F	LOW FAT	2020-11-16	2	10	NA	NA	NA	NA	NA	NA	0.0380927	0.866738	0.0524919	0.857476	-0.0143992	0.00926224	31.7509	83.5145	68	72	0.3	84	14415	82	67	61	34	0	1.8	5.7	1	1.9	1.1	0.7	0.7	1.4	0.8	1.1	0	114	197	83	72.807
EE1DCD2C1E	YK411	76166_2	76195_1	M	HIGH FAT	2020-11-14	2	9	NA	NA	NA	NA	NA	NA	0.162498	0.781574	0.0485496	0.872341	0.113948	-0.0907667	960.325	183.832	76	64	1.5	94	18787.5	61	83	59	44	0	2.3	9.7	13.8	7.7	4.6	1.2	1.2	2.4	1.4	1.8	0	155	432	277	178.71
EE1DCD2C1F	YK417	76152_2	76115_1	M	HIGH FAT	2020-11-16	2	10	NA	NA	NA	NA	NA	NA	0.24601	0.700182	0.0719014	0.850728	0.174109	-0.150545	1001.14	164.88	111	154	3.9	133	33540	84	196	48	52	0	2	10.7	19.3	15.2	8.4	1.2	1.1	2.3	1.4	1.8	0	162	464	302	186.42
EE1DCD2C20	YK394	76055_2	76241_1	F	LOW FAT	2020-11-02	2	12	NA	NA	NA	NA	NA	NA	0.0629662	0.845756	0.0546547	0.86991	0.00831157	-0.0241537	135.604	98.8263	57	63	0.233333	89	17325	78	72	66	33	0	2	6.5	2.2	3.6	NA	0.8	0.7	1.5	NA	NA	0	126	237	111	88.0952
EE1DCD2C21	YK409	76160_2	76062_1	M	HIGH FAT	2020-11-14	2	9	NA	NA	NA	NA	NA	NA	0.124575	0.816601	0.0388221	0.880175	0.0857531	-0.0635741	761.33	149.033	78	51	2	99	16552.5	70	105	49	41	0	2.1	8.1	7.6	6.6	3.5	1.1	1.1	2.2	1.3	1.7	0	157	371	214	136.306
EE1DCD2C22	YK398	76159_2	76059_1	F	LOW FAT	2020-11-07	2	8	NA	NA	NA	NA	NA	NA	0.0640315	0.848153	0.0405	0.860625	0.0235315	-0.0124718	192.49	82.3191	50	53	NA	76	NA	66	56	81	36	0	1.8	4.2	0.8	2.6	1.3	0.6	0.6	1.2	0.6	1.1	0	89	156	67	75.2809
EE1DCD2C23	YK341	75741_2	75799_1	M	LOW FAT	2020-10-05	5	11	NA	NA	NA	NA	NA	NA	0.133635	0.807228	0.0499796	0.852658	0.0836553	-0.0454307	552.864	131.162	121	98	1.3	91	17010	76	134	58	44	0	1.9	11.1	10	10.6	3.9	1.3	1.2	2.5	1.3	1.9	0	150	396	246	164
EE1DCD2C24	YK416	76213_1	76063_1	F	HIGH FAT	2020-11-15	2	7	NA	NA	NA	NA	NA	NA	0.127589	0.79473	0.0393137	0.857908	0.0882752	-0.0631786	704.988	129.773	70	53	0.9	78	16200	77	91	55	42	0	1.9	6.8	4.3	7.3	4.1	0.9	0.9	1.8	0.9	1.6	0	112	263	151	134.821
EE1DCD2C25	YK392	75738_2	75828_1	F	HIGH FAT	2020-11-01	6	5	NA	NA	NA	NA	NA	NA	0.116252	0.798661	0.0449074	0.869321	0.0713443	-0.0706597	496.838	111.816	69	67	0.533333	80	12697.5	68	72	84	32	0	1.9	6.4	4.8	9.4	NA	0.8	0.9	1.7	NA	NA	0	126	261	135	107.143
EE1DCD2C26	YK387	76151_2	76157_1	M	HIGH FAT	2020-11-01	1	5	NA	NA	NA	NA	NA	NA	0.202483	0.739933	0.0624113	0.850355	0.140072	-0.110421	937.727	178.324	94	76	4.9065	85	16095	60	78	59	52	0	2	10.6	23.3	13.2	NA	1.4	1.3	2.7	NA	NA	0	167	469	302	180.838
EE1DCD2C27	YK447	76167_2	76187_1	M	HIGH FAT	2020-12-06	3	14	NA	NA	NA	NA	NA	NA	0.154403	0.781251	0.0416541	0.873985	0.112749	-0.0927339	1028.76	172.201	87	77	2.6	90	20662.5	79	54	65	47	0	1.9	10	13.8	15.4	6	1.1	1.1	2.2	1.2	2.2	0	157	419	262	166.879
EE1DCD2C28	YK407	75714_2	75754_1	M	LOW FAT	2020-11-09	6	12	NA	NA	NA	NA	NA	NA	0.147632	0.789187	0.0619774	0.847373	0.0856544	-0.0581861	652.963	194.396	109	94	1.4	85	NA	110	124	63	32	0	2.1	11.6	8.6	8.3	5	1.1	1.1	2.2	1.1	2.2	0	139	379	240	172.662
EE1DCD2C29	YK337	75802_2	75822_2	M	HIGH FAT	2020-10-04	5	11	NA	NA	NA	NA	NA	NA	NA	NA	0.0903578	0.830923	NA	NA	NA	NA	NA	NA	NA	NA	NA	NA	NA	NA	NA	NA	NA	NA	NA	NA	NA	NA	NA	NA	NA	NA	0	154	NA	NA	NA
EE1DCD2C2A	YK345	75708_2	75842_1	M	HIGH FAT	2020-10-05	4	9	NA	NA	NA	NA	NA	NA	0.270641	0.669538	0.107012	0.814004	0.163629	-0.144466	533.808	106.132	77	46	3.2	111	20490	95	172	78	77	0	1.8	9.5	16.7	13.2	8.8	1.1	1.1	2.2	1.1	1.9	0	142	395	253	178.169
EE1DCD2C2B	YK454	76109_2	76144_1	F	HIGH FAT	2020-12-06	3	8	NA	NA	NA	NA	NA	NA	0.0808133	0.838373	0.0332471	0.893333	0.0475662	-0.05496	423.855	102.258	72	62	0.333333	88	15202.5	64	45	68	39	0	1.8	7	1.9	4.6	2.2	NA	1.2	NA	1	1.8	0	129	250	121	93.7984
EE1DCD2C2C	YK449	76165_2	76203_1	M	LOW FAT	2020-12-06	3	15	NA	NA	NA	NA	NA	NA	0.0866577	0.839441	0.0479427	0.86625	0.0387149	-0.0268086	422.488	180.117	93	97	1.2	93	12060	45	86	58	37	0	2	10.5	6.8	6.9	3.5	1.1	1.1	2.2	1	1.9	0	148	389	241	162.838
EE1DCD2C2D	YK332	75807_3	75806_1	F	HIGH FAT	2020-09-28	5	10	NA	NA	NA	NA	NA	NA	0.223375	0.700611	0.0740885	0.830573	0.149286	-0.129962	465.308	58.1614	80	NA	0.8	100	19155	68	63	60	39	0	1.8	6.5	5.1	12.6	4.3	0.8	0.8	1.6	1.1	1.5	0	120	251	131	109.167
EE1DCD2C2E	YK324	75841_2	75739_1	F	LOW FAT	2020-09-19	4	11	NA	NA	NA	NA	NA	NA	0.0988082	0.812812	0.0666967	0.826517	0.0321115	-0.0137046	138.901	58.5874	60	47	0.566667	86	14595	NA	NA	NA	NA	NA	1.8	4.5	2.2	2.7	1.6	NA	1.1	NA	0.7	1	0	110	190	80	72.7273
EE1DCD2C2F	YK356	75750_4	75854_2	F	HIGH FAT	2020-10-11	5	8	NA	NA	NA	NA	NA	NA	0.0492609	0.864646	0.0623913	0.845604	-0.0131304	0.0190417	26.4421	63.7511	69	60	0.35	86	16440	72	47	65	38	0	1.95	6.75	1.85	3.05	1.3	0.8	0.75	1.55	0.8	1.35	0	130	226	96	73.8462
EE1DCD2C30	YK328	75801_3	75809_1	F	LOW FAT	2020-09-27	5	10	NA	NA	NA	NA	NA	NA	0.0622535	0.870908	0.048547	0.86416	0.0137065	0.00674812	133.451	83.4729	66	NA	0.2	81	13500	74	79	71	47	0	1.9	6.3	1.4	3.2	1.2	0.9	0.8	1.7	0.8	0.9	0	114	229	115	100.877
EE1DCD2C31	YK331	75807_3	75806_1	M	LOW FAT	2020-09-28	5	10	NA	NA	NA	NA	NA	NA	0.144781	0.791437	0.0392187	0.882005	0.105562	-0.0905679	843.094	129.236	83	NA	2.2	89	14332.5	76	172	54	40	0	2	8.3	9.3	6.7	4.1	1	1	2	1.4	1.1	0	124	338	214	172.581
EE1DCD2C32	YK343	75775_3	75825_1	M	LOW FAT	2020-10-05	5	6	NA	NA	NA	NA	NA	NA	0.141902	0.783248	0.0467347	0.853515	0.095167	-0.0702669	544.444	94.7715	91	76	2.2	100	16747.5	85	87	53	45	0	1.9	8	8.4	5.4	2.7	1.1	1.1	2.2	1.1	1.9	0	138	315	177	128.261
EE1DCD2C33	YK402	76080_2	76060_1	F	HIGH FAT	2020-11-08	2	13	NA	NA	NA	NA	NA	NA	0.167641	0.765452	0.0502516	0.856258	0.11739	-0.0908059	642.741	99.0304	54	50	1.2	94	NA	93	53	53	30	0	1.8	6.9	4.4	7.7	3.2	0.8	0.8	1.6	0.8	1.3	0	122	233	111	90.9836
EE1DCD2C34	YK413	76190_2	76163_1	M	LOW FAT	2020-11-15	2	12	NA	NA	NA	NA	NA	NA	0.119004	0.826526	0.0513056	0.867444	0.067698	-0.0409189	630.644	200.141	104	83	1.4	89	21150	70	102	53	33	0	1.9	10.1	11.9	7.9	4.6	1	1	2	1.3	1.2	0	141	400	259	183.688
EE1DCD2C35	YK352	76056_2	76280_1	F	LOW FAT	2020-10-10	1	10	NA	NA	NA	NA	NA	NA	0.0708333	0.831737	0.0386226	0.872975	0.0322107	-0.0412379	257.703	85.8279	72	64	0.7	77	16275	62	54	100	35	0	1.8	6.4	3	3.1	2	0.8	0.8	1.6	0.9	1.5	0	121	232	111	91.7355
EE1DCD2C36	YK414	76190_2	76163_1	F	HIGH FAT	2020-11-15	2	12	NA	NA	NA	NA	NA	NA	0.0355095	0.877375	0.0338562	0.86866	0.00165329	0.00871465	98.4556	91.114	61	134	0.5795	78	17722.5	70	85	61	50	0	1.9	5.5	0.8	1.9	0.6	0.7	0.7	1.4	0.8	1.2	0	110	196	86	78.1818
EE1DCD2C37	YK317	75811_3	75744_1	M	LOW FAT	2020-09-19	4	15	NA	NA	NA	NA	NA	NA	0.0724566	0.870571	0.0347586	0.875287	0.037698	-0.00471664	479.365	176.433	119	95	1	97	13320	NA	NA	NA	NA	NA	2.1	11.7	8.3	5.6	3.3	1.4	1.3	2.7	1.2	1.7	0	131	427	296	225.954
EE1DCD2C38	YK474	76388_5	76242_1	F	HIGH FAT	2020-12-20	3	12	54702	26360	28424	8569	7706	863	0.101077	0.801949	0.0428938	0.852894	0.0581832	-0.0509451	404.953	101.486	62	49	0.266667	96	14182.5	64	40	59	53	0	1.7	5.3	2.7	5.4	1.7	0.8	0.7	1.5	0.8	1.4	0	100	207	107	107
EE1DCD2C39	YK383	76240_2	76244_1	M	LOW FAT	2020-10-26	1	10	NA	NA	NA	NA	NA	NA	0.0939666	0.833896	0.0461782	0.872098	0.0477884	-0.0382015	564.841	212.412	100	91	1.2	98	18367.5	91	135	51	32	0	1.9	11.8	8.7	5	NA	1.3	1.2	2.5	NA	NA	0	138	393	255	184.783
EE1DCD2C3A	YK502	76148_2	76206_1	F	HIGH FAT	2021-01-04	4	8	NA	NA	NA	NA	NA	NA	0.0811867	0.826614	0.066734	0.830539	0.0144527	-0.00392441	134.712	92.0177	50	4	0.566667	99	15330	71	59	52	30	0	2	6	1.1	2.4	0.9	0.7	0.7	1.4	0.8	1.3	0	110	209	99	90
EE1DCD2C3B	YK479	76348_2	76239_1	M	LOW FAT	2020-12-21	3	11	36934	20734	16261	5456	5437.67	18.3333	0.154754	0.788571	0.0309357	0.874211	0.123818	-0.0856391	1712.29	226.791	105	80	3	95	19275	110	119	47	28	0	2	11.3	12.2	7.8	5.8	1.3	1.3	2.6	1.5	2.1	0	136	428	292	214.706
EE1DCD2C3C	YK458	75804_3	75839_1	F	LOW FAT	2020-12-12	7	12	NA	NA	NA	NA	NA	NA	0.089616	0.82341	0.0487467	0.8552	0.0408693	-0.0317899	219.147	67.1469	67	50	0.266667	82	15855	63	60	58	48	0	1.9	6.2	2.9	5.4	1.9	0.7	0.7	1.4	1	1.5	0	125	225	100	80
EE1DCD2C3D	YK471	76207_2	76339_2	M	HIGH FAT	2020-12-19	3	13	36186	16122	20103	5621	5157.33	463.667	0.179429	0.756952	0.0435965	0.866287	0.135833	-0.109334	1080.55	150.64	46	50	1.1	102	20047.5	95	53	53	37	0	1.9	8.8	9.2	4.9	3	1.1	1	2.1	1.1	1.6	0	129	336	207	160.465
EE1DCD2C3E	YK379	76083_2	76432_1	M	LOW FAT	2020-10-25	1	7	NA	NA	NA	NA	NA	NA	0.0753763	0.860152	0.0416517	0.883093	0.0337247	-0.0229408	506.489	226.429	109	98	1.6	87	14565	85	114	67	37	0	2.1	9.6	6.5	4.1	NA	1.1	1.1	2.2	NA	NA	0	136	380	244	179.412
EE1DCD2C3F	YK483	76054_2	76182_1	M	HIGH FAT	2020-12-27	4	11	NA	NA	NA	NA	NA	NA	0.180557	0.763956	0.0576437	0.85342	0.122913	-0.0894638	999.003	214.081	94	82	2.1	96	16597.5	90	82	58	48	0	2	11.8	17.3	14.5	5.7	1.4	1.4	2.8	1.3	1.6	0	140	427	287	205
EE1DCD2C40	YK424	75920_3	75709_1	F	LOW FAT	2020-11-23	6	10	NA	NA	NA	NA	NA	NA	0.111859	0.803518	0.0712585	0.828912	0.0406008	-0.025394	218.759	96.8404	58	54	NA	98	18435	87	56	72	38	0	1.8	5.1	2.7	4.4	1.7	0.7	0.7	1.4	0.9	1	0	111	200	89	80.1802
EE1DCD2C41	YK499	76082_2	76160_1	M	LOW FAT	2021-01-03	4	12	NA	NA	NA	NA	NA	NA	0.104963	0.822865	0.0515888	0.854174	0.0533739	-0.0313097	495.169	181.801	97	89	1.4	90	12532.5	NA	NA	NA	NA	NA	1.9	10	5.5	5.6	2.9	1.2	1.2	2.4	1.1	1.2	0	125	335	210	168
EE1DCD2C43	YK426	76280_2	76148_1	F	HIGH FAT	2020-11-23	2	10	NA	NA	NA	NA	NA	NA	0.0785561	0.840169	0.0748185	0.837426	0.00373759	0.00274323	125.584	115.555	47	55	0.166667	92	17092.5	49	56	77	52	0	1.8	5.7	2.2	3.8	2.1	0.8	0.8	1.6	0.9	1.4	0	114	223	109	95.614
EE1DCD2C44	YK380	76083_2	76432_1	F	HIGH FAT	2020-10-25	1	7	NA	NA	NA	NA	NA	NA	0.0516438	0.878021	0.0428889	0.869238	0.00875495	0.00878321	151.147	110.679	63	46	0.233333	84	16582.5	NA	NA	NA	NA	NA	1.9	5.1	1.4	2	NA	0.7	0.7	1.4	NA	NA	0	116	215	99	85.3448
EE1DCD2C45	YK371	75824_3	75797_2	M	HIGH FAT	2020-10-19	6	13	NA	NA	NA	NA	NA	NA	0.163731	0.762005	0.055976	0.862342	0.107755	-0.100337	938.251	213.654	104	87	2.4	122	17572.5	90	71	62	44	0	2	10.9	10.9	14.4	5.8	1.4	1.2	2.6	1.1	1.7	0	132	400	268	203.03
EE1DCD2C46	YK438	76377_1	76156_1	F	HIGH FAT	2020-11-29	2	10	NA	NA	NA	NA	NA	NA	0.0798194	0.832278	0.0466355	0.860498	0.0331839	-0.0282207	283.901	116.943	61	62	0.166667	87	20100	95	55	73	47	0	2	5.8	2.2	4.7	1.9	0.7	0.7	1.4	0.9	1.1	0	124	232	108	87.0968
EE1DCD2C47	YK473	76388_5	76242_1	M	LOW FAT	2020-12-20	3	12	37928	17075	21288	5278	5919.67	-641.667	0.178464	0.764579	0.0790058	0.828041	0.0994586	-0.0634623	605.403	188.347	99	62	3	90	16935	114	117	58	37	0	1.9	12.5	9.6	8.8	4.2	1.1	1.1	2.2	1.2	2.2	0	133	358	225	169.173
EE1DCD2C48	YK432	75691_2	75752_1	F	HIGH FAT	2020-11-24	6	13	NA	NA	NA	NA	NA	NA	0.189875	0.740292	0.059899	0.850808	0.129976	-0.110516	668.465	110.934	58	37	0.933333	97	19222.5	51	66	63	24	0	1.9	6.7	4.7	10.9	3.2	0.9	0.9	1.8	0.9	1.8	0	110	251	141	128.182
EE1DCD2C49	YK431	75691_2	75752_1	M	LOW FAT	2020-11-24	6	13	NA	NA	NA	NA	NA	NA	0.144472	0.790191	0.0624843	0.839434	0.0819875	-0.0492427	698.339	225.028	82	41	2.4	95	16642.5	106	127	50	38	0	2.1	11	7.8	9.7	3.9	1.3	1.3	2.6	1.3	1.7	0	126	370	244	193.651
EE1DCD2C4A	YK482	76193_2	76114_1	F	LOW FAT	2020-12-26	3	11	NA	NA	NA	NA	NA	NA	0.125651	0.787095	0.0896667	0.814061	0.0359841	-0.0269654	167.523	84.5853	67	59	0.233333	81	15922.5	62	56	55	27	0	1.9	6.1	3.3	4.7	2.1	0.7	0.6	1.3	0.8	1.2	0	117	212	95	81.1966
EE1DCD2C4B	YK364	76149_2	76109_1	F	LOW FAT	2020-10-18	1	10	NA	NA	NA	NA	NA	NA	0.0884835	0.821006	0.0466981	0.858019	0.0417854	-0.0370129	296.835	100.399	41	84	0.95	69	13282.5	99	64	59	25	0	1.8	7.3	4	5.3	2	0.9	0.9	1.8	0.8	1.2	0	121	231	110	90.9091
EE1DCD2C4C	YK429	76448_2	76184_1	M	LOW FAT	2020-11-23	2	14	NA	NA	NA	NA	NA	NA	0.0674845	0.874472	0.0590667	0.84576	0.00841781	0.028712	194.312	166.345	101	109	1.1	105	15232.5	57	60	61	39	0	2.1	7.8	6.1	5.4	2.5	1	1.1	2.1	1.1	1.3	0	145	337	192	132.414
EE1DCD2C4E	YK365	76057_2	76055_1	M	LOW FAT	2020-10-18	1	6	NA	NA	NA	NA	NA	NA	0.0830146	0.840073	0.0512022	0.87153	0.0318124	-0.0314572	386.393	189.172	105	82	0.8	93	15255	63	60	73	37	0	1.9	9.4	6.6	5	3.3	1	1.1	2.1	1.1	1.4	0	142	365	223	157.042
EE1DCD2C4F	YK459	75800_3	75707_1	M	HIGH FAT	2020-12-12	7	6	NA	NA	NA	NA	NA	NA	0.211768	0.73471	0.0588671	0.858606	0.152901	-0.123895	941.599	147.762	75	62	1.6	96	22267.5	98	98	55	48	0	2	11.3	17.6	12.8	6.4	1.2	1.2	2.4	1.7	2.6	0	157	455	298	189.809
EE1DCD2C50	YK436	76058_2	76232_1	F	LOW FAT	2020-11-29	3	9	NA	NA	NA	NA	NA	NA	0.0482996	0.866991	0.0311111	0.875058	0.0171885	-0.00806793	236.372	114.669	89	77	0.133333	79	14640	98	63	72	30	0	1.9	7.2	1.3	4	1.3	0.9	0.8	1.7	1.7	1.3	0	129	246	117	90.6977
EE1DCD2C51	YK372	75824_3	75797_2	F	LOW FAT	2020-10-19	6	13	NA	NA	NA	NA	NA	NA	0.0925586	0.798991	0.0557255	0.843098	0.0368331	-0.044107	261.506	106.261	63	63	0.6	92	17415	87	57	58	27	0	1.8	4.7	1.8	3.5	1.2	0.7	0.6	1.3	0.7	1.2	0	92	184	92	100
EE1DCD2C52	YK421	76242_2	76211_1	M	HIGH FAT	2020-11-21	2	13	NA	NA	NA	NA	NA	NA	0.140134	0.800469	0.0449708	0.872193	0.0951632	-0.071724	987.906	220.413	83	75	1.2	98	17362.5	89	92	67	50	0	2	10.1	12.8	8.8	4	1.2	1.1	2.3	1	1.5	0	137	414	277	202.19
EE1DCD2C53	YK444	76368_1	76165_1	F	LOW FAT	2020-11-29	2	11	NA	NA	NA	NA	NA	NA	0.0703876	0.836357	0.0381667	0.850667	0.0322209	-0.0143101	296.507	111.383	76	43	0.466667	74	14835	84	75	52	31	0	1.8	5.8	1.7	2.9	1.4	0.8	0.7	1.5	1	1.2	0	114	214	100	87.7193
EE1DCD2C54	YK428	75739_2	75750_1	F	HIGH FAT	2020-11-23	5	8	NA	NA	NA	NA	NA	NA	0.114547	0.800773	0.0603303	0.861201	0.0542163	-0.0604279	327.626	109.422	72	75	0.433333	90	16972.5	78	64	63	42	0	2	7.2	3.4	6	2.1	1	0.9	1.9	0.8	1.4	0	129	258	129	100
EE1DCD2C55	YK439	75825_3	75925_1	M	LOW FAT	2020-11-29	7	14	NA	NA	NA	NA	NA	NA	0.112136	0.825015	0.0502419	0.858844	0.0618944	-0.0338289	691.974	240.862	128	88	1.9	92	15210	99	149	100	77	0	2.2	11.3	8.4	8.7	3.7	1.5	1.5	3	1.3	1.9	0	150	436	286	190.667
EE1DCD2C56	YK422	76242_2	76211_1	F	LOW FAT	2020-11-21	2	13	NA	NA	NA	NA	NA	NA	0.0271036	0.88199	0.0439934	0.866601	-0.0168898	0.0153896	25.6564	107.582	69	63	NA	85	18315	59	60	70	27	0	2	5.3	1.1	1.7	1.2	0.7	0.7	1.4	0.8	1.7	0	113	213	100	88.4956
EE1DCD2C57	YK362	75702_2	75831_1	F	LOW FAT	2020-10-17	5	14	NA	NA	NA	NA	NA	NA	0.109892	0.82236	0.0600333	0.793033	0.0498586	0.029327	238.645	91.8415	61	54	0.7	101	14430	76	70	67	38	0	1.6	5.7	2.4	3.5	1.7	0.8	0.8	1.6	0.7	0.9	0	107	189	82	76.6355
EE1DCD2C58	YK374	76282_2	76083_1	F	LOW FAT	2020-10-24	1	9	NA	NA	NA	NA	NA	NA	0.0172531	0.90804	0.0342899	0.872174	-0.0170368	0.0358662	-5.49451	95.55	77	97	NA	74	15450	50	55	70	33	0	2	5.9	0.6	1.9	NA	0.8	0.8	1.6	NA	NA	0	127	226	99	77.9528
EE1DCD2C59	YK423	75920_3	75709_1	M	HIGH FAT	2020-11-23	6	10	NA	NA	NA	NA	NA	NA	0.223114	0.728057	0.0609901	0.852442	0.162124	-0.124385	1167.69	195.97	66	47	2	98	20940	107	151	60	52	0	2	9.8	13	12.3	4.9	1	1	2	1	1.6	0	121	350	229	189.256
EE1DCD2C5A	YK480	76348_2	76239_1	F	HIGH FAT	2020-12-21	3	11	55959	25410	30671	8484.5	7715	769.5	0.121025	0.799326	0.0450943	0.865472	0.0759303	-0.0661461	550.697	123.923	77	58	0.4	98	17595	73	57	56	34	0	1.9	6.3	3	5.9	2.1	0.8	0.8	1.6	0.9	1.8	0	122	260	138	113.115
EE1DCD2C5B	YK378	76268_2	76278_1	F	HIGH FAT	2020-10-24	1	6	NA	NA	NA	NA	NA	NA	0.129662	0.786377	0.0612264	0.826478	0.0684354	-0.0401012	313.559	85.8078	45	49	0.866667	94	12825	64	54	59	39	0	1.8	6	3.5	5.2	NA	0.7	0.7	1.4	NA	NA	0	116	216	100	86.2069
EE1DCD2C5C	YK489	76412_2	76282_1	M	HIGH FAT	2020-12-28	3	13	NA	NA	NA	NA	NA	NA	0.116332	0.817438	0.0440187	0.862118	0.0723138	-0.0446805	860.793	244.71	81	79	1.4	93	16200	68	87	61	46	0	2	10	11.4	11.2	5.2	1.2	1.3	2.5	1.2	1.2	0	129	408	279	216.279
EE1DCD2C5D	YK503	75854_3	75829_2	M	LOW FAT	2021-01-04	6	3	NA	NA	NA	NA	NA	NA	0.0956733	0.843731	0.0437984	0.853876	0.0518748	-0.0101453	667.08	246.99	89	84	0.74	75	14115	71	102	69	43	0	2.1	9.5	3.9	4	2.2	1.1	1.1	2.2	1.5	1.5	0	105	319	214	203.81
EE1DCD2C5E	YK463	76472_2	76061_1	M	LOW FAT	2020-12-12	3	11	NA	NA	NA	NA	NA	NA	0.13175	0.789842	0.0671655	0.843878	0.0645849	-0.0540358	377.718	127.943	112	89	1.2	96	15127.5	134	86	52	27	0	2	10.9	7.4	7.8	3.9	1.3	1.2	2.5	1.1	1.5	0	147	363	216	146.939
EE1DCD2C5F	YK500	76082_2	76160_1	F	HIGH FAT	2021-01-03	4	12	NA	NA	NA	NA	NA	NA	0.122829	0.8051	0.0506785	0.856873	0.0721502	-0.0517736	438.359	108.703	76	58	0.633333	83	11730	61	56	59	45	0	1.8	6.9	2.6	5.2	1.9	0.9	0.9	1.8	1	1.6	0	126	256	130	103.175
EE1DCD2C60	YK367	76187_2	76082_1	M	LOW FAT	2020-10-18	1	12	NA	NA	NA	NA	NA	NA	0.0908832	0.829316	0.0427273	0.863939	0.0481559	-0.0346232	578.723	206.303	96	74	1.5	82	15907.5	58	101	82	70	0	1.8	10.3	5.4	5.4	2.9	1.1	1.1	2.2	1.3	1.5	0	127	351	224	176.378
EE1DCD2C61	YK384	76240_2	76244_1	F	HIGH FAT	2020-10-26	1	10	NA	NA	NA	NA	NA	NA	0.0984351	0.812879	0.053569	0.84596	0.044866	-0.0330801	295.349	106.738	73	57	0.533333	82	18510	NA	NA	NA	NA	NA	1.7	5.8	3	5.5	NA	0.9	0.8	1.7	NA	NA	0	112	222	110	98.2143
EE1DCD2C62	YK366	76057_2	76055_1	F	HIGH FAT	2020-10-18	1	6	NA	NA	NA	NA	NA	NA	0.0794922	0.840156	0.0435537	0.870909	0.0359385	-0.0307528	286.148	104.099	82	67	0.35	76	14385	54	48	80	49	0	1.8	6.1	2.6	4.8	2.1	0.8	0.8	1.6	0.9	1.5	0	136	264	128	94.1176
EE1DCD2C63	YK433	75750_3	75834_2	M	HIGH FAT	2020-11-29	7	11	NA	NA	NA	NA	NA	NA	0.297929	0.651746	0.0566133	0.854667	0.241316	-0.202921	1845.03	181.847	97	75	2.9	83	19027.5	98	72	47	51	0	2.1	11.8	20.1	17.6	11.1	1.3	1.4	2.7	1.2	1.7	0	148	469	321	216.892
EE1DCD2C64	YK430	76448_2	76184_1	F	HIGH FAT	2020-11-23	2	14	NA	NA	NA	NA	NA	NA	0.0539199	0.86618	0.0522419	0.872153	0.001678	-0.00597313	112.818	104.783	56	48	0.2	96	14017.5	50	49	81	37	0	2	6.3	1.7	3.5	1.5	0.8	0.8	1.6	0.8	1.2	0	128	235	107	83.5938
EE1DCD2C65	YK488	76535_2	76215_1	F	HIGH FAT	2020-12-28	1	14	NA	NA	NA	NA	NA	NA	0.0777469	0.84071	0.0320675	0.868101	0.0456794	-0.0273914	562.895	164.791	53	49	0.333333	87	15240	63	57	73	46	0	1.8	5.3	1.5	3.3	1.2	0.6	0.8	1.4	0.9	0.9	0	90	214	124	137.778
EE1DCD2C66	YK495	76046_2	76190_1	M	HIGH FAT	2021-01-02	4	11	NA	NA	NA	NA	NA	NA	0.0731933	0.862979	0.0306183	0.882796	0.042575	-0.0198172	588.235	181.44	94	84	1.1	102	16117.5	96	55	76	68	0	2.1	8.8	5.7	7.8	2.3	1.2	1.2	2.4	1.2	1.6	0	146	366	220	150.685
EE1DCD2C67	YK361	75702_2	75831_1	M	HIGH FAT	2020-10-17	5	14	NA	NA	NA	NA	NA	NA	0.248392	0.697635	0.0626764	0.847372	0.185715	-0.149738	1224.88	175.232	87	65	1.27	84	17025	148	156	380	315	0	1.9	12.2	25.9	16.4	10.1	1.3	1.3	2.6	1.4	1.6	0	160	462	302	188.75
EE1DCD2C68	YK427	75739_2	75750_1	M	LOW FAT	2020-11-23	5	8	NA	NA	NA	NA	NA	NA	0.0905469	0.844826	0.0480741	0.862716	0.0424728	-0.0178897	435.747	178.546	115	86	1.7	95	16042.5	88	102	51	38	0	2.1	11.8	6.1	5.3	2.9	1.3	1.3	2.6	1.4	1.9	0	159	389	230	144.654
EE1DCD2C69	YK465	76275_2	76154_1	M	HIGH FAT	2020-12-13	2	10	NA	NA	NA	NA	NA	NA	0.166772	0.766763	0.064092	0.856575	0.10268	-0.0898113	580.129	133.974	70	52	1.6	90	18315	72	88	56	55	0	1.9	8.8	11.7	10.1	3.6	1.1	1.1	2.2	1.3	2.2	0	146	391	245	167.808
EE1DCD2C6A	YK425	76280_2	76148_1	M	LOW FAT	2020-11-23	2	10	NA	NA	NA	NA	NA	NA	0.11244	0.827902	0.0491195	0.87478	0.0633203	-0.0468783	616.965	196.423	96	49	1.9	101	16185	104	151	48	40	0	2	11.8	6.4	5.6	3.3	1.2	1.2	2.4	1.3	1.8	0	126	338	212	168.254
EE1DCD2C6B	YK363	76149_2	76109_1	M	HIGH FAT	2020-10-18	1	10	NA	NA	NA	NA	NA	NA	0.144315	0.793548	0.0553221	0.850504	0.0889931	-0.0569563	785.62	216.761	100	79	2.4	85	14122.5	105	146	48	51	0	1.9	11.7	16.4	11.1	5.1	1.5	1.5	3	1.4	1.8	0	143	414	271	189.51
EE1DCD2C6C	YK462	75704_2	75807_1	F	HIGH FAT	2020-12-12	7	10	NA	NA	NA	NA	NA	NA	0.167978	0.742896	0.0824074	0.828968	0.0855707	-0.0860721	294.735	73.544	62	57	0.3	93	16597.5	47	50	59	50	0	1.8	7.5	5	9.8	3.3	0.9	1	1.9	1	1.7	0	129	253	124	96.124
EE1DCD2C6D	YK370	75735_2	75801_1	F	LOW FAT	2020-10-19	5	14	NA	NA	NA	NA	NA	NA	0.118409	0.789141	0.0462305	0.857103	0.0721786	-0.0679614	531.941	127.165	89	73	0.766667	91	17842.5	75	82	71	32	0	2	7.9	3.3	8.5	3	0.9	0.9	1.8	1	1.2	0	123	262	139	113.008
EE1DCD2C6E	YK481	76193_2	76114_1	M	HIGH FAT	2020-12-26	3	11	NA	NA	NA	NA	NA	NA	0.229323	0.707927	0.0644928	0.831478	0.16483	-0.123551	1118.25	191.7	80	75	2.8	99	17820	81	59	52	39	0	1.8	11.1	16.2	15.5	8.8	1.2	1.1	2.3	1.2	1.2	0	130	410	280	215.385
EE1DCD2C6F	YK505	75711_2	75920_1	M	HIGH FAT	2021-01-10	8	6	NA	NA	NA	NA	NA	NA	0.242914	0.696214	0.0660436	0.852181	0.17687	-0.155967	1292.17	209.23	79	52	1.7	122	18975	87	117	63	35	0	1.9	10.7	18.2	13.2	6.6	1.2	1.1	2.3	1	1.7	0	126	409	283	224.603
EE1DCD2C70	YK486	76188_2	76058_1	F	HIGH FAT	2020-12-27	3	9	NA	NA	NA	NA	NA	NA	0.0893852	0.836434	0.0543386	0.862884	0.0350466	-0.0264492	218.549	87.715	58	62	0.833333	105	17047.5	51	37	51	25	0	1.9	6.7	2.5	4.4	1.7	0.9	0.9	1.8	0.9	1	0	137	243	106	77.3723
EE1DCD2C71	YK477	75822_3	75705_1	M	LOW FAT	2020-12-21	7	9	38223	18492	19758	5427	5614.67	-187.667	0.0684517	0.865774	0.0456695	0.882479	0.0227822	-0.0167045	368.871	206.899	111	104	0.9	92	16245	59	75	87	46	0	2.1	11	4.6	4.8	2.5	1.3	1.2	2.5	1.1	1.9	0	144	378	234	162.5
EE1DCD2C72	YK490	76412_2	76282_1	F	LOW FAT	2020-12-28	3	13	NA	NA	NA	NA	NA	NA	0.0506239	0.865312	0.0658095	0.846889	-0.0151856	0.0184231	36.9995	81.9695	63	61	0.233333	77	16942.5	NA	NA	NA	NA	NA	1.8	5.7	1.3	3	1.4	0.7	0.7	1.4	0.7	1.1	0	119	193	74	62.1849
EE1DCD2C73	YK504	75854_3	75829_2	F	HIGH FAT	2021-01-04	6	3	NA	NA	NA	NA	NA	NA	0.0373	0.873233	0.0438039	0.85149	-0.00650392	0.0217431	100.358	141.302	61	61	NA	75	14212.5	NA	NA	NA	NA	NA	2	6.5	1.2	2.2	1.1	0.8	0.8	1.6	0.9	1.2	0	97	222	125	128.866
EE1DCD2C74	YK501	76148_2	76206_1	M	LOW FAT	2021-01-04	4	8	NA	NA	NA	NA	NA	NA	0.0980823	0.837613	0.0723664	0.836285	0.0257159	0.00132818	319.023	209.651	102	84	1.1	102	17872.5	94	105	112	53	0	2	13.3	6.3	5.6	3	1.2	1.2	2.4	1.3	1.6	0	154	414	260	168.831
EE1DCD2C76	YK440	75825_3	75925_1	F	HIGH FAT	2020-11-29	7	14	NA	NA	NA	NA	NA	NA	0.108288	0.806144	0.0444118	0.859869	0.0638758	-0.0537255	509.566	134.38	63	60	0.266667	78	14295	85	57	62	32	0	2	6.2	2.8	5.9	1.4	0.8	0.8	1.6	0.9	1.2	0	122	245	123	100.82
EE1DCD2C77	YK496	76046_2	76190_1	F	LOW FAT	2021-01-02	4	11	NA	NA	NA	NA	NA	NA	0.0340444	0.875407	0.0424484	0.866903	-0.00840393	0.00850475	59.6942	101.068	85	91	NA	85	16455	56	50	79	39	0	1.9	2.2	2.1	2.5	0.9	1	1	2	1.1	1	0	124	249	125	100.806
EE1DCD2C78	YK485	76188_2	76058_1	M	LOW FAT	2020-12-27	3	9	NA	NA	NA	NA	NA	NA	0.133933	0.796979	0.0665977	0.84846	0.067335	-0.0514811	463.1	163.011	99	81	1.2	98	17542.5	74	109	48	25	0	2.1	11.6	10.9	7.6	4.9	1.3	1.2	2.5	1.3	1.6	0	170	414	244	143.529
EE1DCD2C79	YK464	76472_2	76061_1	F	HIGH FAT	2020-12-12	3	11	NA	NA	NA	NA	NA	NA	0.101572	0.812814	0.0536391	0.851621	0.0479332	-0.0388063	268.301	85.6327	47	43	NA	85	15832.5	87	55	97	60	0	1.9	5.8	1.9	4.5	1.2	0.8	0.8	1.6	0.7	1.2	0	112	207	95	84.8214
EE1DCD2C7A	YK381	76277_2	76268_1	M	LOW FAT	2020-10-25	1	9	NA	NA	NA	NA	NA	NA	0.160149	0.786211	0.056821	0.864599	0.103328	-0.0783882	949.104	238.475	130	121	1.7	102	19815	79	152	55	32	0	1.9	11.7	12.8	7.9	NA	1.2	1.2	2.4	NA	NA	0	130	420	290	223.077
EE1DCD2C7B	YK467	76217_2	76348_1	M	HIGH FAT	2020-12-15	3	16	NA	NA	NA	NA	NA	NA	0.129062	0.809453	0.0363682	0.879751	0.0926943	-0.0702981	916.963	163.668	83	63	1.7	93	16245	97	69	46	45	0	2	10.9	10.1	8.9	4.4	1.3	1.3	2.6	1.1	2	0	139	399	260	187.05
EE1DCD2C7C	YK491	76504_7	76092_1	M	HIGH FAT	2020-12-28	2	10	NA	NA	NA	NA	NA	NA	0.202175	0.734326	0.0475	0.868387	0.154675	-0.134061	1351.95	188.466	75	70	2.6	96	16545	75	93	64	47	0	2.1	11.4	16.8	14	7.7	NA	2	NA	1.2	2	0	152	444	292	192.105
EE1DCD2C7D	YK460	75800_3	75707_1	F	LOW FAT	2020-12-12	7	6	NA	NA	NA	NA	NA	NA	0.0755512	0.841569	0.0493333	0.864026	0.0262179	-0.0224563	202.755	92.5542	73	65	0.333333	91	17355	84	52	61	38	0	1.8	7.3	3.8	5.2	1.8	1	0.9	1.9	1.1	1.2	0	130	264	134	103.077
EE1DCD2C7E	YK469	76223_2	76228_1	M	HIGH FAT	2020-12-20	3	7	39665	16470	23214	5773	5887	-114	0.164663	0.774503	0.0473491	0.875459	0.117314	-0.100956	984.368	175.854	85	69	1.8	104	22125	86	65	61	51	0	2.1	10.8	11.9	7.5	4.9	1.2	1.2	2.4	1.2	2.4	0	153	416	263	171.895
EE1DCD2C80	YK377	76268_2	76278_1	M	LOW FAT	2020-10-24	1	6	NA	NA	NA	NA	NA	NA	0.147717	0.788565	0.059697	0.861736	0.0880196	-0.0731704	679.142	188.14	104	75	2.5	101	18990	115	151	57	32	0	2	13	11.6	9.3	NA	1.1	1.1	2.2	NA	NA	0	143	389	246	172.028
EE1DCD2C81	YK382	76277_2	76268_1	F	HIGH FAT	2020-10-25	1	9	NA	NA	NA	NA	NA	NA	0.0918966	0.837098	0.0380272	0.871701	0.0538693	-0.034603	472.093	127.337	65	64	0.45	90	16852.5	51	63	70	40	0	2	6.3	2.8	5.1	NA	0.9	0.7	1.6	NA	NA	0	111	248	137	123.423
EE1DCD2C82	YK375	76241_2	76412_1	M	HIGH FAT	2020-10-24	1	13	NA	NA	NA	NA	NA	NA	0.228421	0.716829	0.057402	0.848211	0.171019	-0.131382	1283.99	193.923	110	89	3.148	106	21772.5	87	133	57	43	0	2	11.2	26.4	11.9	NA	1.4	1.5	2.9	NA	NA	0	164	497	333	203.049
EE1DCD2C83	YK475	76189_2	76080_1	M	LOW FAT	2020-12-20	3	6	35051	15746	19685	5748	4682.33	1065.67	0.214196	0.722664	0.0764775	0.824965	0.137718	-0.102301	760.093	169.011	125	102	2.3	105	21112.5	102	152	51	29	0	2	13.5	14.6	10.9	6.4	1.3	1.2	2.5	1.3	2	0	162	445	283	174.691
EE1DCD2C84	YK457	75804_3	75839_1	M	HIGH FAT	2020-12-12	7	12	NA	NA	NA	NA	NA	NA	0.144103	0.7903	0.0542716	0.852864	0.0898317	-0.0625637	598.226	143.673	87	60	0.8	97	18097.5	99	83	58	50	0	2	8.9	9.4	6.3	3.9	1	0.9	1.9	1.2	1.7	0	136	363	227	166.912
EE1DCD2C85	YK441	75772_3	75753_1	M	HIGH FAT	2020-11-29	5	5	NA	NA	NA	NA	NA	NA	0.146484	0.799887	0.0520476	0.854857	0.0944368	-0.05497	671.958	156.648	74	72	1.5	86	14400	108	93	58	57	0	2	9.3	12.5	8.4	4.3	1	1	2	1.1	1.8	0	158	393	235	148.734
EE1DCD2C86	YK368	76187_2	76082_1	F	HIGH FAT	2020-10-18	1	12	NA	NA	NA	NA	NA	NA	0.116977	0.811323	0.0672013	0.822296	0.0497758	-0.0109731	305.615	129.909	62	53	1.1	85	16912.5	52	55	56	43	0	1.7	5.9	3.1	7	2	0.7	0.8	1.5	0.9	1.1	0	115	249	134	116.522
EE1DCD2C87	YK498	76339_3	76047_1	F	HIGH FAT	2021-01-04	4	5	NA	NA	NA	NA	NA	NA	0.168943	0.74855	0.0888701	0.829266	0.080073	-0.0807154	296.313	88.183	69	83	1.43333	94	17235	89	104	49	40	0	1.9	8.1	3.9	6.5	3.2	0.9	0.9	1.8	1.1	1.2	0	132	254	122	92.4242
EE1DCD2C88	YK476	76189_2	76080_1	F	HIGH FAT	2020-12-20	3	6	55963	26099	29960	8617.5	7374.33	1243.17	0.151745	0.769455	0.0524242	0.851424	0.0993203	-0.0819694	463.121	75.8159	52	56	NA	86	15045	97	70	77	35	0	1.8	5.4	3.3	6.6	1.8	NA	1.2	NA	0.9	1.2	0	124	224	100	80.6452
EE1DCD2C89	YK376	76241_2	76412_1	F	LOW FAT	2020-10-24	1	13	NA	NA	NA	NA	NA	NA	0.111518	0.81734	0.0577778	0.836013	0.0537402	-0.0186735	303.054	104.159	70	69	0.55	84	15262.5	68	59	64	39	0	1.5	6.5	3.3	5.2	NA	0.8	0.8	1.6	NA	NA	0	112	220	108	96.4286
EE1DCD2C8A	YK494	76144_2	76223_1	F	LOW FAT	2021-01-02	4	12	NA	NA	NA	NA	NA	NA	0.0415426	0.850443	0.0482818	0.848247	-0.00673923	0.00219584	66.7616	94.3162	72	76	NA	84	16417.5	75	177	65	53	0	1.7	5	0.9	1.7	1.1	0.8	0.7	1.5	0.8	1.2	0	109	207	98	89.9083
EE1DCD2C8B	YK443	76368_1	76165_1	M	HIGH FAT	2020-11-29	2	11	NA	NA	NA	NA	NA	NA	0.0963144	0.839502	0.0333022	0.876386	0.0630123	-0.0368846	948.737	247.355	84	74	2.2	85	13785	84	81	51	44	0	2.1	10.1	8.2	8.3	3.4	1.2	1.2	2.4	1.2	1.4	0	128	402	274	214.062
EE1DCD2C8C	YK470	76223_2	76228_1	F	LOW FAT	2020-12-20	3	7	58885	26330	32982	9921.5	8225.33	1696.17	0.0287279	0.881626	0.0531987	0.85835	-0.0244708	0.0232762	12.9114	114.761	60	80	0.2	82	18847.5	53	52	52	22	0	1.8	5.3	0.9	1.6	0.9	0.7	0.7	1.4	0.9	1.5	0	110	228	118	107.273
EE1DCD2C8D	YK461	75704_2	75807_1	M	LOW FAT	2020-12-12	7	10	NA	NA	NA	NA	NA	NA	0.236194	0.699679	0.0855128	0.83156	0.150681	-0.13188	636.557	124.375	76	33	3.06	105	18315	156	105	412	457	0	1.9	11.9	16.8	11.9	7	1.3	1.3	2.6	1.5	2.3	0	158	404	246	155.696
EE1DCD2C8E	YK487	76535_2	76215_1	M	LOW FAT	2020-12-28	1	14	NA	NA	NA	NA	NA	NA	0.153118	0.781729	0.0490643	0.860439	0.104054	-0.0787092	918.355	196.466	102	78	1	86	17700	73	92	56	25	0	2	8.7	11.2	5.2	3.9	1	1	2	1.1	1.1	0	138	383	245	177.536
EE1DCD2C8F	YK493	76144_2	76223_1	M	HIGH FAT	2021-01-02	4	12	NA	NA	NA	NA	NA	NA	NA	NA	0.0445872	0.873242	NA	NA	NA	NA	65	NA	NA	NA	NA	NA	NA	NA	NA	NA	NA	NA	NA	NA	NA	NA	NA	NA	NA	NA	0	128	NA	NA	NA
EE1DCD2C90	YK373	76282_2	76083_1	M	HIGH FAT	2020-10-24	1	9	NA	NA	NA	NA	NA	NA	0.096747	0.857534	0.0361728	0.881827	0.0605741	-0.024293	722.184	198.939	91	66	1.4	87	20775	87	76	61	41	0	2.2	11.2	7.6	7.8	NA	1.5	1.4	2.9	NA	NA	0	159	430	271	170.44
EE1DCD2C91	YK468	76217_2	76348_1	F	LOW FAT	2020-12-13	3	16	NA	NA	NA	NA	NA	NA	0.0171159	0.881986	0.0478553	0.866357	-0.0307394	0.0156289	-36.2311	81.511	80	92	NA	89	17160	NA	NA	NA	NA	NA	2	7.1	1.2	3	1.5	0.9	0.9	1.8	0.8	1.5	0	134	241	107	79.8507
EE1DCD2C92	YK507	76060_2	76153_1	M	HIGH FAT	2021-01-10	4	8	NA	NA	NA	NA	NA	NA	0.128281	0.795302	0.0643658	0.838171	0.0639155	-0.042869	464.39	168.702	84	69	0.8465	100	15727.5	72	43	56	41	0	2	8.1	5.2	4.7	2.6	1.1	1.1	2.2	1.2	1.5	0	127	330	203	159.843
EE1DCD2C93	YK369	75735_2	75801_1	M	HIGH FAT	2020-10-19	5	14	NA	NA	NA	NA	NA	NA	0.167695	0.767387	0.0561944	0.838306	0.111501	-0.0709182	1004.15	238.699	86	61	2.4	108	18825	108	74	58	38	0	2	12.1	14.2	11.2	8.3	1.4	1.4	2.8	1.1	1.6	0	140	444	304	217.143
EE1DCD2C94	YK437	76377_1	76156_1	M	LOW FAT	2020-11-29	2	10	NA	NA	NA	NA	NA	NA	0.148475	0.778886	0.0623168	0.862459	0.0861578	-0.0835724	597.876	164.525	114	95	2.3	98	14130	81	161	42	32	0	2.1	10.4	10.3	10.1	2.7	1.3	1.2	2.5	1.2	1.8	0	170	413	243	142.941
EE1DCD2C95	YK472	76207_2	76339_2	F	LOW FAT	2020-12-19	3	13	47424	15720	31950	6984.5	7064.33	-79.8333	0.0522848	0.854883	0.036994	0.851875	0.0152908	0.00300763	168.785	90.85	66	84	0.266667	76	14685	77	83	74	37	0	1.9	5.5	1.7	2.6	0.8	0.8	0.8	1.6	0.8	1	0	118	240	122	103.39
EE1DCD2C96	YK442	75772_3	75753_1	F	LOW FAT	2020-11-29	5	5	NA	NA	NA	NA	NA	NA	0.0716741	0.836338	0.0446789	0.868654	0.0269952	-0.0323166	228.2	96.9759	62	58	0.166667	73	14962.5	82	81	54	26	0	1.9	6.3	2	3.1	1.7	0.8	0.8	1.6	0.9	1.1	0	125	213	88	70.4
EE1DCD2C97	YK434	75750_3	75834_2	F	LOW FAT	2020-11-29	7	11	NA	NA	NA	NA	NA	NA	0.0899239	0.835403	0.0734277	0.840975	0.0164962	-0.00557149	153.019	105.235	76	88	0.233333	78	13515	63	56	45	25	0	1.9	6.4	2.1	5.1	2.2	0.7	0.8	1.5	0.9	1.2	0	118	227	109	92.3729
EE1DCD2C98	YK492	76504_7	76092_1	F	LOW FAT	2020-12-28	2	10	NA	NA	NA	NA	NA	NA	0.0949741	0.804041	0.0616993	0.85183	0.0332747	-0.0477886	191.261	78.6005	55	61	1.1	94	17430	65	53	55	32	0	1.9	6.2	2	3.7	1.8	0.7	0.8	1.5	0.7	1	0	115	201	86	74.7826
EE1DCD2C9A	YK466	76275_2	76154_1	F	LOW FAT	2020-12-14	2	10	NA	NA	NA	NA	NA	NA	0.0293047	0.890164	0.055	0.856242	-0.0256953	0.0339218	-14.8544	66.1349	56	69	NA	80	13012.5	66	39	61	38	0	1.7	5.1	0.9	2.2	1.2	0.7	0.7	1.4	0.8	1	0	103	180	77	74.7573
EE1DCD2C9B	YK435	76058_2	76232_1	M	HIGH FAT	2020-11-29	3	9	NA	NA	NA	NA	NA	NA	0.168032	0.771524	0.0466927	0.866563	0.121339	-0.0950382	1018.96	176.836	88	73	NA	92	18442.5	87	71	52	45	0	2	10.9	13.5	9.3	5.1	1.2	1.2	2.4	1.3	1.6	0	146	408	262	179.452
EE1DCD2C9C	YK551	76224_2	76372_1	M	LOW FAT	2021-02-01	5	9	37457	12256	25384	5347.5	4960.67	386.833	0.141962	0.782879	0.0901075	0.817392	0.0518543	-0.0345133	366.289	183.471	102	81	2.5	97	17677.5	89	75	48	33	0	2.1	10.4	9.1	9.9	4.9	1.4	1.4	2.8	1	1.8	0	134	388	254	189.552
EE1DCD2C9D	YK581	76811_2	76790_1	M	LOW FAT	2021-02-24	2	12	36849	15890	20959	5656	4414.33	1241.67	0.101704	0.819808	0.0426214	0.859968	0.0590826	-0.0401593	625.133	189.693	91	80	0.8	90	17242.5	131	288	44	30	0	2	8.5	6.3	4.6	2.8	1	1.1	2.1	1	1.4	0	118	322	204	172.881
EE1DCD2C9E	YK532	76795_2	76789_3	F	LOW FAT	2021-01-24	5	13	NA	NA	NA	NA	NA	NA	0.0716588	0.86079	0.0550741	0.86063	0.0165847	0.00016026	205.044	134.488	77	59	0.4	72	16837.5	51	47	69	29	0	1.8	6.4	2	3.6	1	0.8	0.7	1.5	1.1	1.3	0	102	218	116	113.725
EE1DCD2C9F	YK579	76844_2	76837_1	M	HIGH FAT	2021-02-22	2	13	NA	NA	NA	NA	NA	NA	NA	NA	0.0306107	0.879695	NA	NA	NA	NA	NA	NA	NA	NA	NA	NA	NA	NA	NA	NA	NA	NA	NA	NA	NA	NA	NA	NA	NA	NA	0	NA	NA	NA	NA
EE1DCD2CA0	YK550	76184_2	76448_1	F	HIGH FAT	2021-02-01	5	10	60008	20983	39556	7870.5	8356.67	-486.167	0.111058	0.814787	0.0588298	0.853865	0.0522287	-0.0390785	323.749	114.195	48	45	0.533333	106	17377.5	46	29	65	47	0	1.9	5.8	3.3	5.5	2.2	0.8	0.7	1.5	0.8	1.3	0	103	230	127	123.301
EE1DCD2CA1	YK545	76766_2	76792_1	M	LOW FAT	2021-02-01	1	7	29483	13049	16497	4410.5	3854.33	556.167	0.144255	0.788186	0.0722969	0.84591	0.0719576	-0.0577242	488.532	174.83	108	91	2.4	92	16560	91	192	58	37	0	2	11.2	11	8.1	4.8	1.1	1.1	2.2	1.3	1.5	0	140	369	229	163.571
EE1DCD2CA2	YK549	76184_2	76448_1	M	LOW FAT	2021-02-01	5	10	40524	13289	27329	5932	5342.67	589.333	0.0914328	0.839861	0.0614521	0.849109	0.0299807	-0.00924821	393.502	228.071	89	73	2.4	98	16222.5	102	98	133	100	0	2	10.3	7.1	4.9	3.4	1.1	1.1	2.2	1.2	1.8	2	105	362	257	244.762
EE1DCD2CA3	YK561	76221_2	76056_1	M	HIGH FAT	2021-02-09	2	12	NA	NA	NA	NA	NA	NA	0.197534	0.736739	0.0650712	0.840114	0.132463	-0.103375	976.751	211.055	78	61	3.2	113	26917.5	72	68	67	45	0	1.9	11	17.6	11.4	6.5	1.3	1.3	2.6	1.2	2	0	133	430	297	223.308
EE1DCD2CA4	YK506	75711_2	75920_1	F	LOW FAT	2021-01-10	8	6	NA	NA	NA	NA	NA	NA	0.157075	0.747131	0.0738511	0.833074	0.0832234	-0.0859436	389.395	106.359	73	73	1	85	16627.5	67	87	44	17	0	1.8	7.4	4.6	8.4	3.4	0.8	0.9	1.7	0.8	1.3	0	115	231	116	100.87
EE1DCD2CA5	YK568	76889_2	76820_1	F	LOW FAT	2021-02-13	1	10	NA	NA	NA	NA	NA	NA	0.0867852	0.833733	0.0667797	0.854605	0.0200055	-0.0208712	147.8	86.0212	88	104	0.833333	71	15075	85	56	49	34	0	1.9	7.9	2.9	5.8	2.8	1.1	1	2.1	0.9	1.4	0	134	249	115	85.8209
EE1DCD2CA6	YK518	76168_2	76149_1	F	LOW FAT	2021-01-17	4	8	46507	22933	23779	7446	6156.67	1289.33	0.134552	0.765323	0.0792079	0.816172	0.0553441	-0.050849	212.833	72.685	52	40	0.666667	77	18375	95	95	77	40	0	1.9	5	2.6	4.2	2	0.7	0.7	1.4	0.7	1	0	110	202	92	83.6364
EE1DCD2CA7	YK515	75757_3	75691_1	M	HIGH FAT	2021-01-11	8	8	NA	NA	NA	NA	NA	NA	0.160562	0.761706	0.0850292	0.824825	0.0755329	-0.0631184	459.869	173.803	78	64	2.2	95	15532.5	73	133	50	39	0	1.9	9.1	9.5	7.1	2.8	1.1	1.1	2.2	1	1.4	0	130	342	212	163.077
EE1DCD2CA8	YK538	76154_2	76151_1	F	LOW FAT	2021-01-27	1	10	NA	NA	NA	NA	NA	NA	0.107559	0.792911	0.0820275	0.825464	0.0255312	-0.0325531	187.935	110.928	73	59	0.85	83	15127.5	58	48	60	29	0	2	6.6	3.5	5.7	2.3	0.8	0.8	1.6	0.8	1.2	0	110	217	107	97.2727
EE1DCD2CA9	YK523	75815_3	75706_1	M	LOW FAT	2021-01-22	8	11	40362	18958	21447	5454.5	5317	137.5	0.120423	0.802394	0.0521368	0.854103	0.0682858	-0.0517082	951.23	327.574	120	92	1.5	91	12982.5	80	151	108	82	0	2	10	6.9	5.5	3.4	2	NA	NA	1.1	1.6	0	99	368	269	271.717
EE1DCD2CAA	YK572	76961_2	76804_1	F	HIGH FAT	2021-02-16	1	10	NA	NA	NA	NA	NA	NA	0.0827071	0.813495	0.0499206	0.844444	0.0327864	-0.0309495	225.437	89.2293	48	45	0.4	103	16672.5	NA	NA	NA	NA	NA	1.6	4.8	1.4	3.5	1.5	0.7	0.6	1.3	0.7	1.1	0	94	170	76	80.8511
EE1DCD2CAB	YK547	76270_2	76045_1	M	LOW FAT	2021-02-01	5	5	35368	14712	20683	4753.5	5084.67	-331.167	0.200619	0.737257	0.0756481	0.830679	0.124971	-0.0934219	759.445	187.627	104	87	3.3	96	17962.5	136	219	57	50	0	1.9	11.1	10.7	9.2	5.2	1	1	2	1.2	1.7	2	128	375	247	192.969
EE1DCD2CAC	YK541	76750_2	76791_1	M	HIGH FAT	2021-01-30	1	11	33691	12153	21612	4813	4465	348	0.109887	0.820101	0.0513522	0.860409	0.0585352	-0.0403075	497.551	166.164	63	60	1.1	94	15412.5	75	95	61	62	0	1.9	9.1	7.6	5.4	3.4	1.1	1	2.1	0.9	1.3	0	120	320	200	166.667
EE1DCD2CAD	YK580	76844_2	76837_1	F	LOW FAT	2021-02-22	2	13	51990	23505	28485	5685	7824.33	-2139.33	0.0724127	0.850286	0.0405667	0.8433	0.031846	0.00698571	274.856	111.74	90	91	0.4	67	14662.5	99	56	74	74	0	1.7	6.7	2.4	3.9	1.6	0.8	0.8	1.6	0.9	0.9	0	104	233	129	124.038
EE1DCD2CAE	YK513	76226_2	76277_1	M	HIGH FAT	2021-01-11	4	11	NA	NA	NA	NA	NA	NA	0.144061	0.791225	0.0703	0.859167	0.0737608	-0.067942	641.821	233.373	77	68	NA	102	14220	76	80	52	41	0	2	8.9	9	7.2	4.2	1.1	1.2	2.3	1.2	1.2	0	121	377	256	211.57
EE1DCD2CAF	YK527	76425_2	76057_1	M	LOW FAT	2021-01-22	4	5	56106	17102	39158	8386	7544	842	0.0938674	0.823419	0.062254	0.856603	0.0316134	-0.0331837	455.737	254.293	122	112	1.9	96	17340	60	157	80	53	0	2	12	6.1	4.3	3.9	1.2	1.2	2.4	1.4	1.2	0	122	406	284	232.787
EE1DCD2CB0	YK533	76790_2	76795_1	M	LOW FAT	2021-01-27	5	11	NA	NA	NA	NA	NA	NA	0.118359	0.817274	0.0631373	0.854314	0.0552221	-0.0370394	605.745	260.148	99	72	1.7	96	17107.5	80	78	54	38	0	2	12.6	8.8	6.6	4.2	1.1	1.1	2.2	1.3	1.6	2	123	400	277	225.203
EE1DCD2CB1	YK563	76232_2	76464_1	M	HIGH FAT	2021-02-09	5	12	NA	NA	NA	NA	NA	NA	0.149603	0.787823	0.0492464	0.854638	0.100357	-0.0668149	943.437	216.625	94	66	1.8	105	21052.5	46	49	76	46	0	2	9.9	11.5	9.1	5	1.3	1.2	2.5	1.2	1.4	1	131	410	279	212.977
EE1DCD2CB2	YK567	76889_2	76820_1	M	HIGH FAT	2021-02-13	1	10	NA	NA	NA	NA	NA	NA	0.166658	0.764519	0.0538983	0.849661	0.11276	-0.0851425	961.268	208.827	105	88	NA	132	22005	53	56	73	48	0	2.1	12.9	15.5	14.7	7.3	1.3	1.1	2.4	1.1	1.8	2	133	439	306	230.075
EE1DCD2CB3	YK554	76215_2	76193_1	F	LOW FAT	2021-02-08	5	10	NA	NA	NA	NA	NA	NA	0.0818466	0.836322	0.0428655	0.847602	0.0389811	-0.01128	256.753	84.3556	81	62	0.4	84	15652.5	46	33	56	21	0	1.8	7.3	1.9	5.7	2.1	0.8	0.8	1.6	0.8	1.2	0	119	229	110	92.437
EE1DCD2CB4	YK555	76081_2	76324_1	M	HIGH FAT	2021-02-08	3	8	NA	NA	NA	NA	NA	NA	0.139035	0.776113	0.0456929	0.853146	0.0933419	-0.0770328	785.492	164.735	60	54	1.4	102	17025	46	30	66	50	0	1.7	6.3	5.6	3.7	2.6	0.9	0.8	1.7	1.3	1.4	0	101	258	157	155.446
EE1DCD2CB5	YK560	76208_2	76168_1	F	HIGH FAT	2021-02-09	5	12	NA	NA	NA	NA	NA	NA	0.0789623	0.828003	0.0504127	0.861841	0.0285496	-0.0338381	216.247	93.9775	58	43	0.118667	89	19230	NA	NA	NA	NA	NA	2	5.6	1.8	4.4	1.5	0.8	0.8	1.6	0.8	1.4	1.5	114	211	97	85.0877
EE1DCD2CB6	YK573	76842_2	76729_3	M	LOW FAT	2021-02-16	1	12	NA	NA	NA	NA	NA	NA	0.176667	0.758498	0.0419094	0.882654	0.134757	-0.124156	1434.75	212.866	115	74	2.2	101	21525	93	104	62	34	0	2.1	10.2	7.8	8.3	4.8	1	1.1	2.1	1	2.1	0	128	384	256	200
EE1DCD2CB7	YK585	76803_2	76816_1	M	HIGH FAT	2021-02-22	2	7	35438	14858	20580	4990.5	4493.33	497.167	0.083884	0.836755	0.0367514	0.871186	0.0471326	-0.0344313	555.726	175.934	61	56	0.9	90	18892.5	55	65	57	38	0	2.1	8.5	6.9	5.3	2.5	1	1	2	1.2	1.4	0	133	351	218	163.91
EE1DCD2CB8	YK552	76224_2	76372_1	F	HIGH FAT	2021-02-01	5	9	39479	14746	24908	6513.5	5233	1280.5	0.211416	0.720631	0.0733607	0.839208	0.138055	-0.118577	511.806	82.2986	63	64	1.743	110	20445	99	114	105	81	0	1.9	6.9	7	11.2	4.6	0.9	0.9	1.8	0.8	1.4	0	138	273	135	97.8261
EE1DCD2CB9	YK596	76153_2	76054_1	F	HIGH FAT	2021-02-28	5	7	NA	NA	NA	NA	NA	NA	0.170692	0.75483	0.0949344	0.825092	0.0757574	-0.0702617	275.173	90.8926	72	NA	0.333333	82	16020	87	50	59	45	0	1.8	7.8	5.7	10.1	3	1	1	2	1	1.4	0	141	268	127	90.0709
EE1DCD2CBA	YK588	76826_2	76775_1	F	LOW FAT	2021-02-24	2	10	NA	44197	NA	26382	NA	NA	0.0729185	0.835363	0.0668199	0.84249	0.0060986	-0.00712746	182.225	156.433	92	118	0.266667	96	14895	125	214	56	29	0	1.9	7.9	1.7	4.9	1.9	0.8	0.9	1.7	1.1	1.3	0	93	250	157	168.817
EE1DCD2CBB	YK599	76857_2	76910_1	M	HIGH FAT	2021-03-01	2	12	NA	NA	NA	NA	NA	NA	0.16686	0.762495	0.0473064	0.847609	0.119554	-0.0851148	1004.48	181.687	70	NA	1.6	89	15870	55	63	60	32	0	1.9	8.1	12.2	7.3	4.7	0.9	0.9	1.8	2.2	1.5	0	116	314	198	170.69
EE1DCD2CBC	YK524	75815_3	75706_1	F	HIGH FAT	2021-01-22	8	11	55056	25065	30147	9273.5	7043.67	2229.83	0.119724	0.792611	0.0755251	0.830959	0.0441984	-0.0383475	371.221	183.542	81	72	0.366667	84	19005	57	60	59	40	0	1.9	5.7	2.9	5.3	2.7	0.7	0.8	1.5	0.8	0.7	0	84	230	146	173.81
EE1DCD2CBD	YK603	76211_2	76040_1	M	HIGH FAT	2021-03-08	6	14	33891	14242	19649	5211.5	4451.67	759.833	0.0977236	0.830849	0.0429595	0.867944	0.0547641	-0.0370948	684.482	230.121	89	71	1.5	90	18067.5	53	49	71	48	0	2.1	9.15	9	7.2	NA	1	1	2	NA	NA	0	129	392	263	203.876
EE1DCD2CBE	YK530	76795_2	76789_3	F	LOW FAT	2021-01-24	4	4	NA	NA	NA	NA	NA	NA	0.0269394	0.8925	0.0349838	0.877799	-0.00804442	0.0147006	64.4773	117.169	70	82	0.166667	64	15420	51	64	62	27	0	1.8	6.7	1.1	2.9	1.3	0.8	0.8	1.6	0.9	1.1	0	115	226	111	96.5217
EE1DCD2CBF	YK595	76153_2	76054_1	M	LOW FAT	2021-02-28	5	7	NA	NA	NA	NA	NA	NA	0.106432	0.821285	0.0789209	0.831607	0.0275107	-0.0103221	285.172	182.066	98	92	0.9	82	17700	69	81	56	36	0	2	11.1	7.4	9	4.4	1.5	1.5	3	1.4	1.3	0	160	411	251	156.875
EE1DCD2CC0	YK564	76232_2	76464_1	F	LOW FAT	2021-02-09	5	12	NA	NA	NA	NA	NA	NA	0.100491	0.814993	0.0622654	0.844239	0.0382252	-0.0292467	261.954	116.502	92	78	NA	91	18930	49	46	57	28	0	2.1	6.4	3.5	6.7	3	0.7	0.8	1.5	0.8	1.6	1.5	115	241	126	109.565
EE1DCD2CC1	YK569	76722_3	76840_1	M	LOW FAT	2021-02-14	1	11	NA	NA	NA	NA	NA	NA	0.104282	0.819904	0.0533051	0.872797	0.0509765	-0.0528924	476.948	177.043	84	67	1.3	88	15217.5	98	73	72	38	0	2.1	9.1	7.2	6.2	3.2	0.9	1	1.9	1.1	1.5	0	140	352	212	151.429
EE1DCD2CC2	YK534	76147_2	76081_1	F	HIGH FAT	2021-01-27	5	11	NA	NA	NA	NA	NA	NA	0.0470558	0.855415	0.0335833	0.877542	0.0134725	-0.0221271	245.037	140.041	54	50	0.3	82	13575	54	40	57	31	0	1.8	5.8	1.4	3.2	1.6	0.6	0.6	1.2	0.8	1.1	0	92	213	121	131.522
EE1DCD2CC3	YK583	76047_2	76205_1	M	LOW FAT	2021-02-22	6	6	43073	16324	26749	6734	4805.33	1928.67	0.150254	0.774013	0.0529867	0.8528	0.097267	-0.0787873	734.826	167.201	111	69	3.7	99	18292.5	60	55	54	22	0	1.9	12.6	9.9	9.6	3.9	1.1	1.1	2.2	1.2	1.5	0	140	NA	NA	NA
EE1DCD2CC4	YK586	76803_2	76816_1	F	LOW FAT	2021-02-22	2	7	55227	23702	31525	8879	6522.67	2356.33	0.0545856	0.840718	0.0416508	0.862508	0.0129348	-0.0217897	125.915	68.0261	60	52	0.35	82	15442.5	65	38	72	32	0	1.9	4.8	1.6	2.7	1.7	0.6	0.6	1.2	0.9	1	0	110	197	87	79.0909
EE1DCD2CC5	YK509	75685_2	75804_1	M	LOW FAT	2021-01-11	8	7	NA	NA	NA	NA	NA	NA	NA	NA	0.0480952	0.877407	NA	NA	NA	NA	NA	NA	NA	NA	NA	NA	NA	NA	NA	NA	NA	NA	NA	NA	NA	NA	NA	NA	NA	NA	0	147	NA	NA	NA
EE1DCD2CC6	YK601	76244_2	76472_1	M	HIGH FAT	2021-03-08	6	13	27793	10567	17226	4287	3601.67	685.333	0.133728	0.799412	0.0434323	0.869967	0.090296	-0.0705547	954.787	214.791	79	59	0.5	94	17535	NA	NA	NA	NA	NA	2.1	9.1	8.5	9.1	NA	1.2	1.1	2.3	NA	NA	0	120	369	249	207.5
EE1DCD2CC7	YK562	76221_2	76056_1	F	LOW FAT	2021-02-09	2	12	NA	NA	NA	NA	NA	NA	0.0893863	0.825579	0.0498397	0.851795	0.0395466	-0.0262161	312.154	122.735	67	63	0.45	108	18667.5	74	36	99	42	0	1.9	7.3	5.5	7.9	3.6	0.8	0.8	1.6	0.8	1.8	0	116	260	144	124.138
EE1DCD2CC8	YK535	76790_2	76795_1	M	LOW FAT	2021-01-27	5	9	NA	NA	NA	NA	NA	NA	0.122786	0.812563	0.0655556	0.848431	0.05723	-0.0358687	559.222	237.081	95	76	1.4	88	15787.5	69	94	52	28	0	2.1	11	7.3	7.9	4	1.3	1.4	2.7	1.1	0.9	0	119	371	252	211.765
EE1DCD2CC9	YK558	76205_2	76167_1	F	HIGH FAT	2021-02-08	5	3	NA	NA	NA	NA	NA	NA	0.0665492	0.851483	0.0517664	0.869858	0.0147828	-0.0183744	149.422	89.9188	67	52	0.233333	93	NA	70	70	56	57	0	1.9	6.3	2	4.6	1.5	0.8	0.8	1.6	0.9	1.1	0	128	235	107	83.5938
EE1DCD2CCA	YK514	76226_2	76277_1	F	LOW FAT	2021-01-11	4	11	NA	NA	NA	NA	NA	NA	0.0687037	0.855247	0.0555449	0.852276	0.0131588	0.00297127	156.896	108.416	68	62	0.233333	85	16050	57	46	61	27	0	1.9	5.1	1.2	2.8	0.9	0.7	0.7	1.4	0.8	1.2	0	119	210	91	76.4706
EE1DCD2CCC	YK590	76794_2	76839_1	F	LOW FAT	2021-02-27	2	12	NA	NA	NA	NA	NA	NA	0.132639	0.771128	0.055193	0.849263	0.0774459	-0.0781347	385.696	83.511	65	54	0.45	88	17175	87	80	65	33	0	1.7	5.7	2.9	6	2.7	0.8	0.8	1.6	0.8	1.2	0	108	198	90	83.3333
EE1DCD2CCD	YK559	76208_2	76168_1	M	LOW FAT	2021-02-09	5	12	NA	NA	NA	NA	NA	NA	0.160396	0.760234	0.0694737	0.832251	0.0909227	-0.0720177	564.268	162.822	54	47	0.3	92	15705	NA	NA	NA	NA	NA	2	8.7	7.6	6.5	3.8	1.1	1.1	2.2	1	1.2	0	128	324	196	153.125
EE1DCD2CCE	YK593	76202_2	76188_1	M	LOW FAT	2021-02-27	5	11	NA	NA	NA	NA	NA	NA	0.143026	0.794063	0.0715702	0.841129	0.0714557	-0.0470661	473.095	170.73	100	74	1.6	105	17430	71	76	53	26	0	1.9	10.8	8.6	6.6	3.7	1.3	1.3	2.6	1.1	1.7	0	142	345	203	142.958
EE1DCD2CCF	YK546	76766_2	76792_1	F	HIGH FAT	2021-02-01	1	7	55029	23169	32377	7653	8375	-722	0.0754045	0.843479	0.0587973	0.858832	0.0166073	-0.0153527	172.355	108.575	82	56	0.5	89	15240	47	35	62	31	0	1.7	5.6	2.1	3.3	1.5	0.7	0.6	1.3	1.6	1.2	0	110	220	110	100
EE1DCD2CD0	YK543	76156_2	76202_1	M	HIGH FAT	2021-01-30	4	5	NA	NA	NA	NA	NA	NA	0.095942	0.841467	0.0681975	0.846173	0.0277445	-0.00470545	283.49	171.077	88	74	1	92	17895	63	61	54	32	0	2.2	9.2	6.6	8.3	3.5	1.3	1.2	2.5	1.4	1.4	0	158	385	227	143.671
EE1DCD2CD1	YK597	76817_2	76800_1	M	HIGH FAT	2021-03-01	2	10	NA	NA	NA	NA	NA	NA	0.0775508	0.853537	0.0339623	0.873742	0.0435885	-0.0202056	606.574	202.278	85	NA	1	98	15075	77	50	65	45	0	1.9	7.6	6.2	4.9	2.9	1.1	1.1	2.2	1.1	1.9	0	124	345	221	178.226
EE1DCD2CD2	YK604	76211_2	76040_1	F	LOW FAT	2021-03-08	6	14	58279	20377	37902	8736.5	8249	487.5	0.0294502	0.887388	0.0309848	0.868523	-0.00153468	0.0188656	109.535	125.243	87	82	0.1	79	13995	92	110	73	59	0	1.8	5.3	0.6	1.4	NA	0.8	0.9	1.7	NA	NA	0	99	214	115	116.162
EE1DCD2CD3	YK516	75757_3	75691_1	F	LOW FAT	2021-01-11	8	8	NA	NA	NA	NA	NA	NA	0.128209	0.774105	0.120722	0.793361	0.00748714	-0.0192564	114.174	96.7718	78	74	0.4	91	14700	88	72	60	28	0	1.9	6.7	3	6.6	2.3	0.8	0.9	1.7	0.9	1.4	0	132	248	116	87.8788
EE1DCD2CD4	YK537	76062_2	76112_1	M	HIGH FAT	2021-01-27	1	10	NA	NA	NA	NA	NA	NA	0.13763	0.797729	0.0627619	0.843524	0.0748684	-0.0457952	607.992	205.329	72	60	1.4	89	18450	89	80	57	41	0	2	9.3	10.7	9.1	5	1.1	1.1	2.2	1	1.5	2	118	362	244	206.78
EE1DCD2CD5	YK529	76203_2	76355_1	M	HIGH FAT	2021-01-24	4	4	NA	NA	NA	NA	NA	NA	0.144361	0.787873	0.0483607	0.868361	0.0960004	-0.0804876	812.655	177.399	80	66	2.1	94	18907.5	64	94	53	34	0	2	9.1	9.7	10.6	3.8	1.1	1.1	2.2	1.1	1.5	0	139	380	241	173.381
EE1DCD2CD6	YK594	76202_2	76188_1	F	HIGH FAT	2021-02-27	5	11	NA	NA	NA	NA	NA	NA	0.0756504	0.835081	0.0607233	0.858396	0.0149271	-0.0233149	189.125	125.772	83	NA	0.3	100	17167.5	53	55	58	57	0	1.9	7.4	3.1	6.3	2.3	0.9	0.9	1.8	0.9	1.4	0	118	257	139	117.797
EE1DCD2CD7	YK525	76112_2	76046_1	M	LOW FAT	2021-01-22	5	12	42718	13844	28993	6491	5347.67	1143.33	0.120104	0.810801	0.0614539	0.844255	0.0586505	-0.0334546	696.307	291.301	120	100	2.5	102	18930	100	176	62	34	0	2	13.5	7.5	5.7	5.3	1.3	1.4	2.7	1.5	1.6	0	113	403	290	256.637
EE1DCD2CD8	YK553	76215_2	76193_1	M	HIGH FAT	2021-02-08	5	10	NA	NA	NA	NA	NA	NA	0.187133	0.740071	0.0557692	0.855919	0.131364	-0.115848	915.249	161.612	100	78	NA	93	16125	65	51	65	53	0	2	11.4	14.5	10.9	6.2	1.4	1.4	2.8	1.4	1.9	0	170	475	305	179.412
EE1DCD2CD9	YK539	76062_2	76112_1	M	HIGH FAT	2021-01-27	1	10	NA	NA	NA	NA	NA	NA	0.0932418	0.834954	0.046875	0.855139	0.0463668	-0.0201847	654.222	270.217	97	80	0.3	96	14947.5	129	55	65	59	0	2.1	11.7	6.7	7.3	4.3	1.4	1.4	2.8	1.1	1.6	3	116	373	257	221.552
EE1DCD2CDA	YK520	76355_2	76221_1	F	LOW FAT	2021-01-19	4	11	NA	NA	NA	NA	NA	NA	0.0996483	0.814526	0.0595341	0.843871	0.0401143	-0.029345	292.354	126.257	86	75	0.333333	73	17190	68	72	57	24	0	1.9	6.1	2.8	5.3	2.3	0.8	0.8	1.6	0.8	1.2	0	106	234	128	120.755
EE1DCD2CDB	YK540	76154_2	76151_1	F	LOW FAT	2021-01-27	1	10	NA	NA	NA	NA	NA	NA	0.0503994	0.848817	0.0536594	0.860725	-0.00326003	-0.0119074	121.54	132.606	92	87	0.3	77	18120	NA	NA	NA	NA	NA	1.9	7.1	2.1	4.1	1.4	0.9	0.9	1.8	0.8	1.2	0	106	230	124	116.981
EE1DCD2CDC	YK566	76914_2	76798_1	F	LOW FAT	2021-02-13	1	11	NA	NA	NA	NA	NA	NA	0.090582	0.829929	0.0585358	0.837414	0.0320462	-0.00748488	173.337	75.0567	60	72	0.3	90	14700	79	83	53	32	0	1.8	5.4	2.8	5.3	2.4	0.6	0.7	1.3	0.8	1.2	0	115	209	94	81.7391
EE1DCD2CDD	YK544	76156_2	76202_1	F	LOW FAT	2021-01-30	4	5	NA	NA	NA	NA	NA	NA	0.0429833	0.869767	0.0568142	0.851976	-0.0138308	0.0177903	33.9045	80.6869	76	74	0.233333	86	16950	81	64	90	47	0	1.9	5.7	1.7	2.2	1.2	0.9	0.8	1.7	0.8	1.2	0	123	230	107	86.9919
EE1DCD2CDE	YK591	76846_2	76821_1	M	HIGH FAT	2021-02-27	2	8	NA	NA	NA	NA	NA	NA	0.181571	0.749491	0.06247	0.849233	0.119101	-0.0997412	667.409	133.019	70	69	1.9	102	17130	86	53	66	45	0	2.1	9.6	12.4	11.7	5.1	1.1	1.1	2.2	1.3	1.2	2	157	386	229	145.86
EE1DCD2CDF	YK582	76811_2	76790_1	F	HIGH FAT	2021-02-24	2	12	46947	22982	23965	5137	6949.67	-1812.67	0.101502	0.799799	0.0657364	0.85186	0.0357654	-0.0520619	226.769	98.6941	53	45	NA	88	18435	NA	NA	NA	NA	NA	1.9	5.2	2.5	4.5	1.2	0.7	0.8	1.5	0.5	1	0	98	197	99	101.02
EE1DCD2CE0	YK511	76217_2	76348_1	M	LOW FAT	2021-01-11	4	10	NA	NA	NA	NA	NA	NA	NA	NA	NA	NA	NA	NA	NA	NA	NA	NA	NA	NA	NA	NA	NA	NA	NA	NA	NA	NA	NA	NA	NA	NA	NA	NA	NA	NA	0	NA	NA	NA	NA
EE1DCD2CE1	YK571	76961_2	76804_1	M	LOW FAT	2021-02-16	1	10	NA	NA	NA	NA	NA	NA	0.0827677	0.825121	0.0435599	0.873625	0.0392078	-0.0485034	508.767	202.6	93	72	1.4	90	14902.5	73	79	75	40	0	2	9	4.8	4.7	3.1	1.2	1.1	2.3	1.1	1.5	0	120	331	211	175.833
EE1DCD2CE2	YK510	75685_2	75804_1	F	HIGH FAT	2021-01-11	8	7	NA	NA	NA	NA	NA	NA	NA	NA	0.0682514	0.838989	NA	NA	NA	NA	NA	NA	NA	NA	NA	NA	NA	NA	NA	NA	NA	NA	NA	NA	NA	NA	NA	NA	NA	NA	0	136	NA	NA	NA
EE1DCD2CE3	YK512	76217_2	76348_1	F	HIGH FAT	2021-01-11	4	10	NA	NA	NA	NA	NA	NA	NA	NA	NA	NA	NA	NA	NA	NA	NA	NA	NA	NA	NA	NA	NA	NA	NA	NA	NA	NA	NA	NA	NA	NA	NA	NA	NA	NA	0	NA	NA	NA	NA
EE1DCD2CE4	YK517	76168_2	76149_1	M	HIGH FAT	2021-01-17	4	8	36030	20168	15941	4839	5148.67	-309.667	0.260748	0.662804	0.0902381	0.830506	0.17051	-0.167702	728.166	128.733	51	47	NA	96	20437.5	81	68	77	37	0	2	8.4	10.3	6	4.9	0.9	0.9	1.8	1	1.2	2	124	333	209	168.548
EE1DCD2CE5	YK548	76270_2	76045_1	F	HIGH FAT	2021-02-01	5	5	47375	17730	30039	7653	6269	1384	0.149919	0.755593	0.101889	0.801333	0.0480298	-0.0457398	235.151	114.776	60	57	0.5	96	16597.5	63	52	61	37	0	1.9	5.5	3.2	6.8	2.1	0.8	0.7	1.5	0.7	1.2	0	100	225	125	125
EE1DCD2CE6	YK542	76750_2	76791_1	F	LOW FAT	2021-01-30	1	11	38651	18555	20286	5232	5727.33	-495.333	0.0870076	0.828807	0.0688148	0.83437	0.0181928	-0.00556355	147.255	94.2516	53	53	0.5	87	15855	41	45	62	30	0	1.7	5.1	1.8	4	1.3	0.7	0.6	1.3	0.6	0.9	0	98	194	96	97.9592
EE1DCD2CE7	YK592	76846_2	76821_1	F	LOW FAT	2021-02-27	2	8	NA	NA	NA	NA	NA	NA	0.0840133	0.814312	0.0748214	0.835565	0.00919184	-0.0212537	101.512	74.8994	75	68	0.4	75	12765	96	68	67	55	0	1.9	5.6	2.4	3.9	1.6	0.8	0.8	1.6	1	1.1	0	120	205	85	70.8333
EE1DCD2CE8	YK576	76239_2	76207_1	F	HIGH FAT	2021-02-17	5	11	NA	NA	NA	NA	NA	NA	0.0927723	0.818845	0.0566667	0.854667	0.0361056	-0.0358218	248.111	103.72	52	44	0.5	92	17700	115	88	52	33	0	1.9	5.3	2.5	4.4	1.1	0.7	0.7	1.4	1	1.1	0	110	210	100	90.9091
EE1DCD2CE9	YK575	76239_2	76207_1	M	LOW FAT	2021-02-17	5	11	NA	NA	NA	NA	NA	NA	0.138645	0.782601	0.0650303	0.843909	0.0736144	-0.0613084	605.499	206.869	95	71	1.5	92	16740	71	131	73	51	0	1.9	11.5	7.4	5.4	3.7	1.3	1.3	2.6	1.3	1.7	0	126	377	251	199.206
EE1DCD2CEA	YK526	76112_2	76046_1	F	HIGH FAT	2021-01-22	5	12	56949	20206	36825	8144	7597.33	546.667	0.152807	0.77188	0.052567	0.847854	0.10024	-0.0759747	788.776	178.35	77	75	0.866667	92	14910	63	64	58	34	0	2	7.4	5	9.1	3.6	0.9	0.9	1.8	1.1	1.5	0	104	292	188	180.769
EE1DCD2CEB	YK584	76047_2	76205_1	F	HIGH FAT	2021-02-22	6	6	62269	22618	39651	9432	7657.67	1774.33	0.203582	0.706692	0.0578142	0.84806	0.145768	-0.141369	673.535	83.0536	85	53	2.005	108	20017.5	64	91	43	34	0	2	7.5	6.3	9.1	3.8	1	0.9	1.9	0.8	1.2	0	132	268	136	103.03
EE1DCD2CEC	YK578	76840_2	77082_1	F	LOW FAT	2021-02-21	1	10	49451	18789	30662	6490.5	5264.67	1225.83	0.0375837	0.871616	0.0403333	0.864194	-0.00274964	0.00742128	77.8237	92.4721	90	85	NA	79	15420	NA	NA	NA	NA	NA	1.9	5.6	1.4	4	1.2	0.7	0.8	1.5	1	1.3	0	128	245	117	91.4062
EE1DCD2CED	YK508	76060_2	76153_1	F	LOW FAT	2021-01-10	4	8	NA	NA	NA	NA	NA	NA	0.10151	0.807274	0.0636667	0.825433	0.0378435	-0.0181589	188.586	77.0181	70	50	0.4	91	14565	47	40	45	24	0	1.7	5.1	1.3	3.5	1.5	0.7	0.6	1.3	0.7	1.2	0	112	186	74	66.0714
EE1DCD2CEE	YK570	76722_3	76840_1	F	HIGH FAT	2021-02-14	1	11	NA	NA	NA	NA	NA	NA	0.0923661	0.824539	0.0392593	0.866061	0.0531068	-0.0415219	432.333	115.415	63	52	0.3	98	16642.5	47	45	65	47	0	1.9	6.8	2.5	6	2	0.8	0.8	1.6	0.9	1.6	0	112	230	118	105.357
EE1DCD2CEF	YK556	76081_2	76324_1	F	LOW FAT	2021-02-08	3	8	NA	NA	NA	NA	NA	NA	0.0497719	0.850842	0.0559649	0.845439	-0.00619298	0.00540351	77.8683	101.278	99	68	0.4	81	14752.5	74	49	49	49	0	1.8	5.2	1.1	2.5	1.5	0.8	0.8	1.6	0.9	0.9	0	110	196	86	78.1818
EE1DCD2CF0	YK536	76147_2	76081_1	F	HIGH FAT	2021-01-27	5	9	NA	NA	NA	NA	NA	NA	0.060268	0.846181	0.0527407	0.857593	0.00752727	-0.0114117	152.669	118.169	60	55	0.2	75	15585	61	34	66	45	0	1.9	5.6	2.1	4.4	1.6	0.8	0.8	1.6	0.8	1.2	0	105	212	107	101.905
EE1DCD2CF1	YK574	76842_2	76729_3	F	HIGH FAT	2021-02-16	1	12	NA	NA	NA	NA	NA	NA	0.0802041	0.831483	0.0398	0.858533	0.0404041	-0.0270503	393.719	137.281	75	50	0.6	101	21502.5	61	58	65	51	0	1.8	6.3	2.3	5.3	2.5	0.8	0.7	1.5	0.7	1.3	0	115	258	143	124.348
EE1DCD2CF2	YK519	76355_2	76221_1	M	HIGH FAT	2021-01-19	4	11	26057	11310	14855	3436	3674	-238	0.247338	0.686994	0.0748667	0.830767	0.172472	-0.143773	1211.58	228.295	90	81	2.2	109	23400	105	70	52	39	0	2.1	10.2	18.9	13	7	1.3	1.1	2.4	1.1	1.5	0	118	419	301	255.085
EE1DCD2CF4	YK589	76794_2	76839_1	M	HIGH FAT	2021-02-27	2	12	NA	NA	NA	NA	NA	NA	0.140665	0.780987	0.060744	0.852024	0.0799205	-0.0710373	563.694	162.711	78	59	2.2	100	18915	90	81	66	56	0	1.8	9.6	9	6.9	4.1	1.1	1	2.1	1.2	1.4	2	134	334	200	149.254
EE1DCD2CF5	YK531	76203_2	76355_1	M	HIGH FAT	2021-01-24	5	13	NA	NA	NA	NA	NA	NA	0.120395	0.817024	0.0596812	0.858754	0.0607143	-0.0417291	520.981	192.868	83	56	1.6	86	17415	NA	NA	NA	NA	NA	2	9.8	8.1	5.7	3.4	1.2	1.1	2.3	1.2	1.6	0	137	365	228	166.423
EE1DCD2CF6	YK577	76840_2	77082_1	M	HIGH FAT	2021-02-21	1	10	NA	NA	NA	NA	NA	NA	NA	NA	0.0524762	0.863929	NA	NA	NA	NA	NA	NA	NA	NA	NA	NA	NA	NA	NA	NA	NA	NA	NA	NA	NA	NA	NA	NA	NA	NA	0	NA	NA	NA	NA
EE1DCD2CF7	YK600	76857_2	76910_1	F	LOW FAT	2021-03-01	2	12	NA	NA	NA	NA	NA	NA	0.0941039	0.811738	0.0475862	0.853218	0.0465177	-0.04148	322.786	103.399	72	68	0.55	87	14422.5	101	115	49	26	0	1.8	5.7	2.7	5.2	1.9	0.6	0.6	1.2	1.4	1	0	98	200	102	104.082
EE1DCD2CF8	YK587	76826_2	76775_1	M	HIGH FAT	2021-02-24	2	10	38292	14560	23732	5363	4926.33	436.667	0.0981052	0.882778	0.0444554	0.854587	0.0536497	0.0281903	634.15	243.647	94	70	NA	80	15855	45	52	59	32	0	2.1	10	5.9	6.9	2.8	1.2	1.2	2.4	1.1	1.7	1.5	112	373	261	233.036
EE1DCD2CF9	YK557	76205_2	76167_1	M	LOW FAT	2021-02-08	5	3	NA	NA	NA	NA	NA	NA	0.138135	0.788899	0.0541604	0.855163	0.0839745	-0.0662641	544.331	133.056	43	76	1.3	96	14497.5	NA	NA	NA	NA	NA	1.9	8.8	7.4	6.5	3.6	0.9	0.9	1.8	1	1.2	0	149	337	188	126.174
EE1DCD2CFA	YK521	75842_3	75756_1	M	LOW FAT	2021-01-21	8	7	31714	15854	15892	4709.5	3893.33	816.167	0.152516	0.786846	0.0535849	0.871604	0.0989308	-0.0847574	896.185	215.965	95	74	1.8	99	18480	76	159	55	27	0	2	11.7	11.1	9.8	6.9	1	1	2	1.1	1.9	0	126	388	262	207.937
EE1DCD2CFB	YK602	76244_2	76472_1	F	LOW FAT	2021-03-08	6	13	47069	16507	30562	7738.5	5563.33	2175.17	0.117568	0.785935	0.0635974	0.837624	0.0539707	-0.0516884	258.744	82.0843	65	49	0.2	77	14025	67	43	77	42	0	1.9	4.9	2.2	4.7	NA	0.65	0.65	1.3	NA	NA	0	113	204	91	80.531
EE1DCD2CFC	YK528	76425_2	76057_1	F	HIGH FAT	2021-01-22	4	5	NA	NA	NA	NA	NA	NA	0.109592	0.809039	0.073405	0.832903	0.0361874	-0.0238639	267.627	139.182	66	59	0.4	81	17940	74	104	88	69	0	1.8	5.9	3.6	3.7	1.9	0.7	0.7	1.4	0.9	0.8	0	105	243	138	131.429
EE1DCD2CFD	YK598	76817_2	76800_1	F	LOW FAT	2021-03-01	2	10	NA	NA	NA	NA	NA	NA	0.0441156	0.852517	0.0371	0.874167	0.00701565	-0.0216497	133.064	91.1459	57	43	0.5365	90	15472.5	69	81	60	31	0	1.8	5.8	0.6	1.7	1	0.8	0.8	1.6	0.9	1.1	0	113	197	84	74.3363
EE1DCD2CFE	YK565	76914_2	76798_1	M	HIGH FAT	2021-02-13	1	11	NA	NA	NA	NA	NA	NA	0.160303	0.750899	0.0657738	0.847202	0.0945292	-0.0963037	594.163	152.445	70	56	3.5	120	16905	89	77	55	33	0	2	9.3	8.9	5.1	4.3	1	1	2	1.1	1.7	2	124	329	205	165.323
EE1DCD2CFF	YK522	75842_3	75756_1	F	HIGH FAT	2021-01-21	8	7	61330	27670	33771	9797.5	8841.33	956.167	0.0704374	0.850558	0.0500725	0.861051	0.0203649	-0.0104927	237.916	137.29	51	55	0.533333	92	18367.5	58	45	57	42	0	1.7	6.6	1.9	3.5	1.6	0.9	0.8	1.7	0.8	1.4	0	107	240	133	124.299
EE1DCD2D00	YK674	76789_4	76734_1	F	LOW FAT	2021-04-18	3	8	NA	NA	NA	NA	NA	NA	0.0414833	0.85925	0.0480198	0.85165	-0.00653647	0.00759983	71.0653	99.7869	74	66	NA	75	15172.5	62	67	45	32	0	1.8	5.1	1.1	2.4	0.9	0.8	0.7	1.5	0.7	1.2	0	117	202	85	72.6496
EE1DCD2D01	YK664	76797_2	76914_1	F	LOW FAT	2021-04-12	3	11	48310	26446	21864	6742.5	5931.33	811.167	0.0519216	0.857275	0.0456818	0.852235	0.00623975	0.00503966	119.569	94.3242	54	63	NA	86	19747.5	67	65	69	44	0	1.7	4.7	1.8	1.5	1.5	0.6	0.6	1.2	0.8	0.7	0	98	194	96	97.9592
EE1DCD2D02	YK702	76839_2	76818_1	F	HIGH FAT	2021-05-02	3	10	59999	23181	36818	8882	7663.33	1218.67	0.137727	0.788787	0.0523423	0.857297	0.0853843	-0.0685106	518.703	116.344	69	69	NA	86	17085	100	96	52	32	0	1.9	7.6	2.6	8.5	2.5	0.8	0.8	1.6	0.9	1.5	0	122	273	151	123.77
EE1DCD2D03	YK639	76843_2	76812_1	M	HIGH FAT	2021-03-28	3	13	37828	13029	24799	5250	4721.33	528.667	0.11406	0.861841	0.0553825	0.853224	0.0586772	0.00861675	465.516	177.363	84	77	1.3	105	25035	62	54	64	47	0	1.8	8.1	7.3	5.6	4	1.1	1	2.1	1.9	1.9	2	138	355	217	157.246
EE1DCD2D04	YK611	76791_2	76886_1	M	HIGH FAT	2021-03-10	2	11	36073	13702	22371	5502.5	4715	787.5	0.193564	0.726117	0.0817901	0.847531	0.111774	-0.121414	723.925	198.274	68	68	3.4	100	16192.5	78	44	54	22	0	2	10.6	10.4	8.8	NA	1.3	1	2.3	NA	NA	0	129	402	273	211.628
EE1DCD2D05	YK673	76789_4	76734_1	M	HIGH FAT	2021-04-18	3	8	NA	NA	NA	NA	NA	NA	0.0736765	0.859804	0.0552339	0.854591	0.0184426	0.00521328	297.83	200.065	72	63	2.1355	99	18990	94	91	57	48	NA	2	8.2	4.3	5.1	2.4	1.2	1.2	2.4	1.1	1.5	0	129	358	229	177.519
EE1DCD2D06	YK627	76820_2	76728_4	M	HIGH FAT	2021-03-24	2	9	NA	NA	NA	NA	NA	NA	0.0946339	0.843471	0.0501366	0.856967	0.0444973	-0.0134961	498.747	212.217	89	76	1.7	86	14850	65	39	60	45	0	2.3	10.75	9.8	8.2	4	1.35	1.35	2.7	1.5	1.8	0	145	405	260	179.31
EE1DCD2D07	YK704	76801_2	76884_1	F	HIGH FAT	2021-05-03	4	9	45817	17083	28734	5570.5	6182.67	-612.167	0.142832	0.779634	0.0555655	0.838095	0.0872665	-0.0584611	464.596	104.322	76	63	0.5	79	17827.5	97	84	52	44	0	2	6.8	3.6	6.3	2.8	0.9	0.9	1.8	1.2	1.5	0	124	256	132	106.452
EE1DCD2D08	YK649	76887_2	76754_1	M	HIGH FAT	2021-04-03	2	11	NA	NA	NA	NA	NA	NA	0.178144	0.760118	0.055036	0.855276	0.123108	-0.0951582	824.488	153.834	74	58	1.2	93	15877.5	56	57	57	36	0	2	10.4	14.1	12.1	5.7	1.4	1.3	2.7	1.3	1.4	2	163	405	242	148.466
EE1DCD2D09	YK628	76820_2	76728_4	F	LOW FAT	2021-03-24	2	9	NA	NA	NA	NA	NA	NA	0.0349436	0.879614	0.0447163	0.863121	-0.00977267	0.016493	72.0856	124.421	92	94	0.166667	63	12240	110	99	63	27	0	1.9	6.1	1	1.9	0.9	0.7	0.7	1.4	0.8	0.8	0	102	205	103	100.98
EE1DCD2D0A	YK678	76886_2	76815_1	F	HIGH FAT	2021-04-20	4	11	NA	NA	NA	NA	NA	NA	0.110312	0.805405	0.0582927	0.857114	0.0520188	-0.0517088	393.863	145.231	50	47	0.35	88	17895	72	52	56	38	NA	1.8	5.3	2.4	3.6	1.5	NA	1.3	NA	0.7	0.9	0	99	203	104	105.051
EE1DCD2D0B	YK626	76799_2	76961_1	F	LOW FAT	2021-03-23	2	11	NA	NA	NA	NA	NA	NA	0.0882465	0.823316	0.0742484	0.848072	0.0139982	-0.0247559	123.724	82.7405	74	76	0.366667	78	15435	75	46	76	45	0	1.9	5.9	2.8	4.5	2.1	0.9	0.8	1.7	1	1.1	0	114	198	84	73.6842
EE1DCD2D0C	YK685	76749_2	76811_1	M	HIGH FAT	2021-04-24	3	10	44091	18000	26091	6536	4815	1721	0.240736	0.695477	0.0873846	0.807487	0.153351	-0.11201	677.729	143.147	74	60	2.2	108	19755	108	160	55	38	0	2	10.7	14.4	11.2	5.8	1.1	2.2	3.3	1	1.7	3	143	379	236	165.035
EE1DCD2D0D	YK606	76858_2	76722_2	F	HIGH FAT	2021-03-09	2	10	46779	19110	27669	7164	6478.67	685.333	0.0617209	0.846047	0.0551812	0.846703	0.00653977	-0.000656387	161.392	133.514	67	57	0.2	86	14152.5	64	32	74	33	0	1.7	5.15	1.6	4	NA	NA	1.1	NA	NA	NA	0	104	232	128	123.077
EE1DCD2D0E	YK692	76884_2	76838_1	F	HIGH FAT	2021-04-27	4	11	47477	20013	27464	5510	6769.67	-1259.67	0.117748	0.806428	0.057563	0.852325	0.0601854	-0.0458973	355.523	110.697	85	67	0.35	78	21412.5	58	43	60	32	0	2	7.1	2.8	4.7	1.8	0.9	0.9	1.8	0.8	1.6	0	131	272	141	107.634
EE1DCD2D0F	YK690	76814_2	77216_1	F	HIGH FAT	2021-04-26	2	10	49457	20391	29066	5225	7654	-2429	0.110316	0.815213	0.054966	0.84585	0.05535	-0.0306371	332.116	107.508	55	47	NA	85	16650	51	28	76	39	0	1.7	6.4	2.5	4.1	1.4	0.8	0.7	1.5	1	1.2	0	108	234	126	116.667
EE1DCD2D10	YK666	76912_2	76766_1	F	HIGH FAT	2021-04-12	3	12	59820	25809	34011	7761	8300.33	-539.333	0.158392	0.773972	0.0583951	0.844722	0.0999974	-0.0707506	608.245	139.241	64	60	1.33333	110	15532.5	74	54	67	43	0	1.7	4.9	4.4	8.2	3.3	1	1	2	0.9	1.4	0	127	300	173	136.22
EE1DCD2D11	YK636	76776_2	76756_1	F	LOW FAT	2021-03-25	1	12	NA	NA	NA	NA	NA	NA	0.0555676	0.915387	0.0369534	0.862294	0.0186142	0.0530935	199.127	111.173	64	67	0.133333	82	17242.5	59	64	60	26	0	1.8	5.2	1.1	1.7	1.3	0.7	0.6	1.3	0.8	1.1	0	106	193	87	82.0755
EE1DCD2D12	YK618	76793_2	76855_1	F	HIGH FAT	2021-03-14	2	10	32850	14433	18417	4191.5	4696	-504.5	0.158127	0.766033	0.0735849	0.842893	0.0845418	-0.07686	390.598	107.484	67	66	NA	107	17707.5	71	41	56	34	0	1.9	6.1	5.3	9.6	1.9	0.7	0.9	1.6	0.8	1.5	0	116	253	137	118.103
EE1DCD2D13	YK665	76912_2	76766_1	M	LOW FAT	2021-04-12	3	12	51896	27484	24412	7687	6680.67	1006.33	0.11181	0.824451	0.0551818	0.868121	0.056628	-0.0436706	564.964	211.673	94	80	1.8	102	15577.5	80	143	56	32	0	2.2	11.5	6.8	4.7	3.2	1.1	1.1	2.2	1.2	1.9	0	134	377	243	181.343
EE1DCD2D14	YK641	76818_2	76854_1	M	LOW FAT	2021-03-28	3	10	46773	19084	27689	7138	5280.67	1857.33	0.154595	0.831462	0.0550129	0.859897	0.0995824	-0.0284345	734.335	187.082	NA	60	2.4	104	18532.5	85	84	58	47	0	2	10	9.9	6.7	4.6	1	1	2	1	1.8	0	156	389	233	149.359
EE1DCD2D15	YK613	76748_2	76888_1	M	HIGH FAT	2021-03-13	2	10	43371	14349	29022	7461	5085	2376	0.25569	0.687749	0.0796328	0.82452	0.176057	-0.136771	846.932	145.995	65	66	2.4	103	19800	76	48	89	67	0	2	8.6	17.4	7.6	4.4	1	1	2	1.2	1.3	0	140	360	220	157.143
EE1DCD2D16	YK651	76838_2	76803_1	M	HIGH FAT	2021-04-04	3	11	NA	NA	NA	NA	NA	NA	0.105724	0.82801	0.0521311	0.868005	0.0535927	-0.0399959	481.813	173.666	78	86	1.2	88	16417.5	83	59	157	48	0	1.9	11.2	9.2	6.7	3.8	1.1	1.1	2.2	1.3	1.5	2.5	141	382	241	170.922
EE1DCD2D17	YK694	76770_2	76843_1	F	HIGH FAT	2021-04-27	4	12	55519	21307	34212	7903	7046.33	856.667	0.0787521	0.821215	0.0566667	0.856465	0.0220854	-0.0352495	184.967	96.6112	62	59	NA	96	16972.5	63	60	58	31	0	1.8	6.5	2.6	4.7	1.9	1	1	2	0.9	1.6	0	107	225	118	110.28
EE1DCD2D18	YK693	76770_2	76843_1	M	LOW FAT	2021-04-27	4	12	51492	18542	32950	7556	6236.67	1319.33	0.0718437	0.859177	0.0483489	0.846324	0.0234948	0.0128531	344.394	203.607	106	113	0.3	93	14827.5	88	57	73	33	0	1.9	8.5	5.2	4.3	2.7	1.2	1.3	2.5	1.1	1.7	0	118	343	225	190.678
EE1DCD2D19	YK648	76195_2	76166_1	F	HIGH FAT	2021-03-31	7	9	47162	20078	27084	6979	5801.67	1177.33	0.109937	0.841053	0.0621032	0.845198	0.0478339	-0.00414495	346.773	151.143	57	56	0.1685	81	15217.5	62	37	61	30	0	1.9	6	4	3.7	1.7	0.8	0.7	1.5	0.9	1	0	99	229	130	131.313
EE1DCD2D1A	YK698	77155_2	76727_4	F	LOW FAT	2021-05-02	3	14	47840	18999	28841	6109	6363.67	-254.667	0.125973	0.790256	0.080944	0.825516	0.0450289	-0.0352598	204.373	87.2217	70	83	0.65	73	13477.5	54	46	53	23	0	1.8	7.3	2.8	7.4	2.2	0.8	0.8	1.6	1	1	0	125	240	115	92
EE1DCD2D1B	YK625	76799_2	76961_1	M	HIGH FAT	2021-03-23	2	11	NA	NA	NA	NA	NA	NA	0.121108	0.819108	0.0347436	0.879391	0.0863646	-0.0602828	1190.41	244.815	97	79	2.1	78	19470	102	86	62	69	0	2	10.8	8.8	12	4.9	1.3	1.2	2.5	1.3	1.8	0	126	398	272	215.873
EE1DCD2D1C	YK661	77081_4	76730_5	M	HIGH FAT	2021-04-11	2	7	40361	16761	23600	5288.5	5532.33	-243.833	0.182779	0.756386	0.0754743	0.836423	0.107305	-0.0800372	717.092	205.113	78	46	3	112	19500	104	106	69	58	0	1.8	10.8	13	12.4	5.6	1.2	1.3	2.5	1.2	1.8	2	141	421	280	198.582
EE1DCD2D1D	YK699	76765_2	76894_1	M	HIGH FAT	2021-05-02	4	8	33414	13927	19487	4332.5	4533	-200.5	0.202	0.739106	0.0655297	0.836279	0.13647	-0.0971734	879.732	180.899	79	73	2.7	106	17917.5	55	59	65	41	0	2	8.6	13.3	9.6	6.8	1.1	1.2	2.3	1.2	1	0	148	435	287	193.919
EE1DCD2D1E	YK675	76792_2	76750_1	M	HIGH FAT	2021-04-19	4	14	NA	NA	NA	NA	NA	NA	0.113018	0.817663	0.0473016	0.858508	0.0657162	-0.0408452	669.128	206.59	82	74	1.5	103	18750	69	77	44	31	0	2.1	9.7	6.7	5.2	2.5	1.2	1.2	2.4	1.1	1.5	0	125	345	220	176
EE1DCD2D1F	YK701	76839_2	76818_1	M	LOW FAT	2021-05-02	3	10	43627	17901	25726	6748	5347.67	1400.33	0.182026	0.76081	0.0607895	0.83617	0.121236	-0.0753593	850.842	188.925	79	47	1.7	84	14752.5	135	264	65	31	NA	2	10.8	10.5	7.1	4.7	0.9	0.9	1.8	1.1	1.7	0	131	360	229	174.809
EE1DCD2D20	YK634	77197_2	76846_1	F	LOW FAT	2021-03-25	1	12	NA	NA	NA	NA	NA	NA	0.0532149	0.858071	0.0432922	0.876584	0.00992271	-0.0185133	198.954	138.073	63	64	0.3	84	14595	66	55	67	36	0	1.8	5.3	1.4	2.6	1	0.7	0.7	1.4	1	1	0	95	194	99	104.211
EE1DCD2D21	YK668	76856_2	76732_3	F	HIGH FAT	2021-04-12	3	13	56238	26187	30051	7939	6706.67	1232.33	0.0849798	0.834818	0.0580189	0.839811	0.0269609	-0.00499351	241.301	131.633	70	70	0.533333	104	19845	71	32	76	55	0	1.9	6.4	3.5	6.3	2.3	1	1	2	1.2	1.2	0	119	263	144	121.008
EE1DCD2D22	YK689	76814_2	77216_1	M	LOW FAT	2021-04-26	2	10	115858	58919	56939	13781	16639	-2858	0.186061	0.752877	0.0647475	0.859545	0.121314	-0.106668	823.05	181.35	81	70	1.7	102	18922.5	103	101	51	28	0	1.9	12.3	12.4	10.3	5.1	1.4	1.3	2.7	1.4	1.3	0	150	437	287	191.333
EE1DCD2D23	YK646	76854_2	76841_1	F	HIGH FAT	2021-03-30	3	15	37798	15990	21808	5225	4540	685	0.05437	0.898357	0.0589691	0.846014	-0.00459906	0.0523435	98.6597	128.795	55	54	NA	76	19245	NA	NA	NA	NA	NA	1.7	5.6	1.9	3.9	1.6	0.8	0.7	1.5	0.8	1.3	0	108	229	121	112.037
EE1DCD2D24	YK688	77216_2	76814_1	F	LOW FAT	2021-04-25	2	17	51471	25566	25905	6504.5	6954.67	-450.167	0.121318	0.910426	0.0676703	0.840896	0.0536476	0.0695303	231.568	100.239	51	67	NA	86	13875	NA	NA	NA	NA	NA	1.8	4.9	1.5	2.7	1	0.8	0.7	1.5	0.6	0.9	0	100	193	93	93
EE1DCD2D25	YK609	76796_2	76733_3	M	HIGH FAT	2021-03-10	2	11	32287	14501	17786	5221.5	4008.33	1213.17	0.135274	0.79997	0.0842708	0.82684	0.0510036	-0.0268708	448.455	230.563	74	66	1.3	106	17370	92	126	53	31	0	1.8	8.4	8.8	7.5	NA	1	1	2	NA	NA	0	113	344	231	204.425
EE1DCD2D26	YK705	76753_2	76802_1	M	HIGH FAT	2021-05-03	4	12	41805	12689	29116	5782.5	5304	478.5	0.199384	0.733156	0.0686333	0.842067	0.13075	-0.108911	937.105	210.827	72	67	1.4	96	17077.5	56	69	51	35	0	2	11.2	12.1	8.2	5.2	1.2	1.1	2.3	1.3	1.3	0	119	381	262	220.168
EE1DCD2D27	YK654	76819_2	76765_1	F	HIGH FAT	2021-04-04	3	13	NA	NA	NA	NA	NA	NA	0.0782716	0.835062	0.0667552	0.846962	0.0115164	-0.0118999	124.127	88.4648	54	55	NA	88	18165	NA	NA	NA	NA	NA	1.8	5.2	2.1	4	1.6	0.7	0.6	1.3	0.9	1.1	0	124	216	92	74.1935
EE1DCD2D28	YK707	76855_2	76799_1	M	HIGH FAT	2021-05-03	4	14	50468	17107	33361	7244.5	6375	869.5	0.164348	0.765959	0.0433333	0.851821	0.121015	-0.085862	1157.19	198.069	85	69	1.1	88	17197.5	59	86	58	52	0	2.1	12	12	9.5	3.7	1.4	1.4	2.8	1.4	0.9	0	132	392	260	196.97
EE1DCD2D29	YK658	76061_2	76388_4	F	LOW FAT	2021-04-06	7	4	NA	NA	NA	NA	NA	NA	0.0862617	0.828209	0.0726389	0.832465	0.0136228	-0.00425656	164.723	121.777	64	57	0.75	108	14317.5	54	73	57	33	0	1.7	5.3	2.2	4.3	1.5	0.8	0.8	1.6	0.9	1.4	0	109	218	109	100
EE1DCD2D2A	YK663	76797_2	76914_1	M	HIGH FAT	2021-04-12	3	11	35892	14347	21545	4979	4383.67	595.333	0.141662	0.802593	0.0453333	0.855267	0.0963286	-0.0526741	996.838	229.383	78	67	2.5	113	17962.5	83	88	65	63	0	2	9.2	12.3	7.1	2.3	1.2	1.1	2.3	1.2	1.2	0	118	373	255	216.102
EE1DCD2D2B	YK624	76755_2	76827_1	F	HIGH FAT	2021-03-14	2	10	55257	24817	30440	7665	7885.67	-220.667	0.0899377	0.829283	0.0547525	0.850528	0.0351852	-0.0212446	248.041	106.589	60	63	0.366667	95	18292.5	114	170	305	319	0	2	6.2	2.5	5.4	1.8	0.9	0.9	1.8	0.8	1.1	0	116	230	114	98.2759
EE1DCD2D2C	YK700	76765_2	76894_1	F	LOW FAT	2021-05-02	4	8	52899	21791	31108	7485	6778	707	0.0873275	0.785037	0.0699353	0.832201	0.0173922	-0.0471639	175.197	107.898	63	61	0.65	99	16575	98	124	43	33	0	1.7	6.3	2.4	6	1.9	0.8	0.8	1.6	0.8	1.3	0	115	236	121	105.217
EE1DCD2D2D	YK657	76061_2	76388_4	M	HIGH FAT	2021-04-06	7	4	NA	NA	NA	NA	NA	NA	0.122184	0.809449	0.0468502	0.864618	0.0753341	-0.0551685	739.817	201.471	78	70	1.5	103	19282.5	87	91	46	36	NA	1.9	9.8	9	5.5	3.3	1.2	1.2	2.4	12.1	1.3	3	127	362	235	185.039
EE1DCD2D2E	YK632	76045_2	76152_1	F	HIGH FAT	2021-03-24	6	5	NA	NA	NA	NA	NA	NA	0.115844	0.810029	0.0829167	0.819792	0.0329277	-0.0097623	230.36	133.643	54	60	0.5	88	14130	102	71	56	38	0	1.8	6.3	3	7	2.3	0.8	0.8	1.6	1	1.3	0	113	248	135	119.469
EE1DCD2D2F	YK697	77155_2	76727_4	M	HIGH FAT	2021-05-02	3	14	31476	12217	19259	4499.5	3837.33	662.167	0.268085	0.68604	0.0790299	0.835896	0.189055	-0.149855	1072.08	183.579	91	70	3.2	116	29677.5	80	87	50	39	0	1.9	14.1	21.8	17.1	10.5	1.4	1.4	2.8	1.5	1.9	3	163	476	313	192.025
EE1DCD2D30	YK629	76754_2	76757_1	M	LOW FAT	2021-03-24	3	11	NA	NA	NA	NA	NA	NA	0.0611667	0.876902	0.053	0.861633	0.00816667	0.0152686	292.39	246.025	97	97	0.8	81	16725	107	194	49	31	0	2.1	9.3	5.3	4.1	2.7	1.1	1	2.1	1.3	1.4	0	123	353	230	186.992
EE1DCD2D31	YK662	77081_4	76730_5	F	LOW FAT	2021-04-11	2	7	54847	27350	27497	7172	7633	-461	0.0392746	0.869603	0.0591358	0.841327	-0.0198612	0.0282756	18.6848	84.7096	71	89	0.3	87	15187.5	83	77	61	28	0	1.8	4.7	1.5	4	1.6	0.8	0.7	1.5	0.9	1.4	0	121	221	100	82.6446
EE1DCD2D32	YK647	76195_2	76166_1	M	LOW FAT	2021-03-31	7	9	34193	21615	12578	4940	4296.33	643.667	0.141375	0.820033	0.0619414	0.844725	0.0794337	-0.0246923	659.965	223.234	NA	51	0.8	89	16125	78	127	67	38	0	2	8.6	9.1	4.8	3.1	0.95	0.95	1.9	1.3	1.6	0	104	328	224	215.385
EE1DCD2D33	YK612	76791_2	76886_1	F	LOW FAT	2021-03-10	2	11	36791	17534	19257	5250	4543.33	706.667	0.113546	0.790833	0.0598936	0.853121	0.0536521	-0.0622872	311.427	101.176	64	62	0.233333	73	16342.5	NA	NA	NA	NA	NA	1.9	5.05	2.1	4.1	NA	0.65	0.5	1.15	NA	NA	0	111	213	102	91.8919
EE1DCD2D34	YK644	76747_2	76819_1	F	HIGH FAT	2021-03-30	3	3	66846	20865	45981	9249	9267	-18	0.0146416	0.938118	0.0357613	0.85321	-0.0211197	0.0849084	-5.98389	152.482	53	61	0.4015	83	15472.5	73	61	82	40	0	1.8	5.8	0.6	0.9	0.8	0.7	0.7	1.4	0.8	1.1	0	90	213	123	136.667
EE1DCD2D35	YK633	77197_2	76846_1	M	HIGH FAT	2021-03-25	1	12	NA	NA	NA	NA	NA	NA	0.202689	0.737661	0.0622222	0.843819	0.140467	-0.106158	1094.42	220.537	72	59	2.3	100	19147.5	67	70	63	47	0	2	9.6	9.7	8.2	4.2	1.1	1.1	2.2	1.3	1.2	0	118	349	231	195.763
EE1DCD2D36	YK605	76858_2	76722_2	M	LOW FAT	2021-03-09	2	10	46374	21548	24826	6788.5	6195.33	593.167	0.12759	0.810504	0.0432993	0.862585	0.0842904	-0.0520808	1072.66	273.931	110	91	1.5	99	17445	66	65	78	38	0	1.9	10.75	10.9	7.4	NA	1.1	1.3	2.4	NA	NA	0	120	411	291	242.5
EE1DCD2D37	YK616	76845_2	76823_1	F	LOW FAT	2021-03-14	2	8	59226	25915	33311	9294.5	7857.33	1437.17	0.0952401	0.83363	0.0328526	0.863045	0.0623875	-0.0294149	557.854	119.189	65	64	0.2	93	19320	78	59	58	38	0	1.8	6.6	2.3	4	2	0.7	0.7	1.4	0.9	1.1	0	122	252	130	106.557
EE1DCD2D38	YK659	76821_2	77146_1	M	HIGH FAT	2021-04-06	2	9	NA	NA	NA	NA	NA	NA	0.191326	0.750196	0.0706918	0.852736	0.120634	-0.10254	811.521	196.294	71	57	0.8	98	17760	105	135	69	47	0	1.8	10.8	8.9	13.9	2.9	1.3	1.1	2.4	1	1.1	0	124	364	240	193.548
EE1DCD2D39	YK614	76748_2	76888_1	F	LOW FAT	2021-03-13	2	10	45642	19303	26339	6488	6666.33	-178.333	0.108571	0.808243	0.0702244	0.83375	0.0383471	-0.025507	201.78	89.2208	64	62	0.833333	94	16267.5	NA	NA	NA	NA	NA	1.8	6.1	3.4	5.4	2.2	0.7	0.7	1.4	0.8	1	0	113	224	111	98.2301
EE1DCD2D3A	YK655	76816_2	76887_1	M	LOW FAT	2021-04-04	3	12	NA	NA	NA	NA	NA	NA	0.12463	0.812567	0.0501977	0.860339	0.0744324	-0.0477715	705.853	206.554	110	104	3.7	111	18202.5	83	125	46	28	0	1.8	14.2	8.7	6.4	4.5	1.2	1.2	2.4	1.4	1.3	0	140	406	266	190
EE1DCD2D3B	YK607	76752_2	76826_1	M	LOW FAT	2021-03-10	2	15	47899	17244	30655	7119	6312	807	0.0602107	0.86499	0.054031	0.853721	0.00617972	0.0112695	350.933	309.993	108	112	0.683	83	15817.5	78	83	67	27	0	1.9	9.6	4	5.1	NA	1.1	1.3	2.4	NA	NA	0	111	374	263	236.937
EE1DCD2D3C	YK677	76886_2	76815_1	M	LOW FAT	2021-04-20	4	11	NA	NA	NA	NA	NA	NA	0.181508	0.750317	0.068479	0.845502	0.113029	-0.095185	821.267	208.444	116	80	3.7	105	18862.5	112	162	68	48	0	1.9	11.6	8.1	8.8	5.7	1.1	1	2.1	1.1	1.8	0	126	362	236	187.302
EE1DCD2D3D	YK669	77003_1	76889_1	M	LOW FAT	2021-04-12	3	13	49675	21197	28478	7073.5	6521.33	552.167	0.09	0.848735	0.0592832	0.833799	0.0307168	0.0149356	394.619	231.643	84	78	0.8	95	15532.5	76	105	61	38	0	2	9	6.2	4.7	2.9	1	1	2	1	1.4	0	109	325	216	198.165
EE1DCD2D3E	YK619	76187_2	76082_1	M	LOW FAT	2021-03-14	2	12	42059	13038	29021	6536.5	5189	1347.5	0.104172	0.819834	0.0546218	0.854258	0.0495497	-0.0344234	448.103	175.814	111	114	1.4	102	17977.5	44	38	76	31	0	2.1	9.4	7.8	6.5	3.3	1.2	1.2	2.4	1.2	2	0	141	366	225	159.574
EE1DCD2D3F	YK608	76752_2	76826_1	F	HIGH FAT	2021-03-10	2	15	51202	22762	28440	7440	6591.33	848.667	0.0476572	0.860708	0.0462025	0.853924	0.0014547	0.0067835	176.804	170.486	65	62	0.566667	93	18600	77	44	57	39	0	1.55	6.1	0.9	2.15	NA	0.07	0.6	0.67	NA	NA	0	94	229	135	143.617
EE1DCD2D40	YK623	76755_2	76827_1	M	LOW FAT	2021-03-14	2	10	39753	15851	23902	6569.5	4596.33	1973.17	0.153798	0.783936	0.054071	0.855027	0.0997274	-0.0710911	802.274	190.838	108	78	2	98	15787.5	126	257	97	62	0	1.9	12	9.5	10.2	4.2	1.4	1.5	2.9	1.3	1.9	0	148	404	256	172.973
EE1DCD2D42	YK695	77146_2	76749_1	M	LOW FAT	2021-04-28	3	11	53575	20353	33222	6701.5	7442.33	-740.833	0.107559	0.821275	0.043	0.851333	0.0645588	-0.0300588	750.465	227.995	120	97	1.6	97	14220	55	88	41	26	0	1.6	9.4	6	5.4	4	1.1	1.1	2.2	1.5	1.4	0	114	353	239	209.649
EE1DCD2D43	YK643	76747_2	76819_1	M	LOW FAT	2021-03-30	3	3	50584	18066	32518	7080.5	6073.33	1007.17	0.0512281	0.907462	0.0300709	0.867943	0.0211571	0.0395187	416.509	216.996	NA	96	1.457	87	16207.5	79	96	62	22	0	1.9	7.7	2.6	3	1.4	0.95	1	1.95	1.3	1.2	0	113	300	187	165.487
EE1DCD2D44	YK622	76911_2	76857_1	F	HIGH FAT	2021-03-14	2	8	40984	17291	23693	6758	5013.67	1744.33	0.174003	0.753091	0.0469048	0.855446	0.127098	-0.102355	675.063	83.93	52	42	0.766667	112	16830	63	38	64	45	0	1.7	5.7	5.4	8.7	2.1	0.8	0.7	1.5	0.9	1.4	0	123	241	118	95.935
EE1DCD2D45	YK620	76187_2	76082_1	F	HIGH FAT	2021-03-14	2	12	47392	16289	31103	7416	6234	1182	0.124886	0.794771	0.0469825	0.849895	0.0779032	-0.0551235	470.799	100.809	57	50	0.333333	116	17640	48	39	63	37	0	1.8	6.2	2.7	5.4	1.6	0.8	0.8	1.6	0.8	1.2	0	105	212	107	101.905
EE1DCD2D46	YK652	76838_2	76803_1	F	LOW FAT	2021-04-04	3	11	NA	NA	NA	NA	NA	NA	0.115261	0.799982	0.0671895	0.829118	0.0480717	-0.0291357	211.138	74.999	41	47	0.266667	77	14662.5	63	51	73	26	0	1.8	4.6	1.8	3.9	1.3	0.6	0.6	1.2	0.7	1	0	112	186	74	66.0714
EE1DCD2D47	YK631	76045_2	76152_1	M	LOW FAT	2021-03-24	6	5	NA	NA	NA	NA	NA	NA	0.169048	0.760385	0.0782292	0.830625	0.0908185	-0.0702395	561.784	180.353	76	69	2.4	97	17505	80	52	61	29	0	2.1	9.3	9.1	6.8	3.3	1	1	2	1.2	1.4	0	111	304	193	173.874
EE1DCD2D48	YK676	76792_2	76750_1	F	LOW FAT	2021-04-19	4	14	NA	NA	NA	NA	NA	NA	0.0479373	0.865264	0.037193	0.877053	0.0107443	-0.0117886	174.057	109.774	71	80	NA	81	15765	69	49	51	24	0	1.9	5.8	1.5	1.3	0.2	0.7	0.7	1.4	0.9	0.9	0	106	203	97	91.5094
EE1DCD2D49	YK615	76845_2	76823_1	M	HIGH FAT	2021-03-14	2	8	38556	15760	22796	6033.5	4961.33	1072.17	0.111414	0.830477	0.0420054	0.869946	0.069409	-0.0394683	697.871	187.166	90	63	0.5	97	17295	111	59	94	52	0	2.2	10.1	6.4	7.4	3.9	1.2	1.2	2.4	1.3	1.7	0	146	392	246	168.493
EE1DCD2D4A	YK650	76887_2	76754_1	F	LOW FAT	2021-04-03	2	11	NA	NA	NA	NA	NA	NA	0.0523381	0.861043	0.0509366	0.855234	0.00140143	0.00580849	79.1779	75.5645	76	71	0.366667	83	15720	66	68	69	26	0	1.9	5.2	1.4	3.2	1.8	0.8	0.8	1.6	1	1	0	134	217	83	61.9403
EE1DCD2D4B	YK687	77216_2	76814_1	M	HIGH FAT	2021-04-25	2	17	47780	18053	29727	6956	5785.33	1170.67	0.162682	0.766807	0.054697	0.860606	0.107985	-0.0937991	810.295	172.702	92	84	1	88	14670	58	28	52	32	0	2.2	9	15.5	11.3	4.9	1.2	2.3	3.5	1.1	1.5	0	147	416	269	182.993
EE1DCD2D4C	YK637	76894_2	76844_1	M	HIGH FAT	2021-03-27	3	9	35917	14668	21249	5029.5	4502.67	526.833	0.152895	0.813205	0.033799	0.875049	0.119096	-0.0618442	1366.86	201.347	91	77	2.4	111	17152.5	58	94	65	42	0	1.9	10.7	11.4	12.4	5.6	1.2	1.3	2.5	1.3	2	0	161	450	289	179.503
EE1DCD2D4D	YK635	76734_2	77155_1	M	HIGH FAT	2021-03-24	3	5	NA	NA	NA	NA	NA	NA	0.133255	0.80941	0.0440816	0.858299	0.089173	-0.0488893	945.679	226.215	75	75	1.9	86	16507.5	72	63	65	25	0	1.9	9.1	8.6	8.6	5	1.2	1.1	2.3	1	1.4	1	112	353	241	215.179
EE1DCD2D4E	YK696	77146_2	76749_1	F	HIGH FAT	2021-04-28	3	11	50504	21414	29090	6672	6654	18	0.0450709	0.871489	0.0452381	0.864008	-0.000167173	0.00748143	122.982	125.747	60	61	NA	76	14902.5	NA	NA	NA	NA	NA	1.8	5.1	1.5	2	0.8	0.9	0.8	1.7	1	0.9	0	94	210	116	123.404
EE1DCD2D4F	YK686	76749_2	76811_1	F	LOW FAT	2021-04-24	3	10	64515	31681	32834	8108.5	8655	-546.5	0.0550673	0.724141	0.0858757	0.823446	-0.0308084	-0.0993049	7.59868	47.5609	60	74	0.7	81	13027.5	73	113	54	39	0	1.9	5.6	2.9	5.6	2.1	0.8	0.8	1.6	0.8	1.2	0	125	216	91	72.8
EE1DCD2D50	YK630	76754_2	76757_1	F	HIGH FAT	2021-03-24	3	11	NA	NA	NA	NA	NA	NA	0.0903857	0.828347	0.0677	0.829	0.0226857	-0.000652893	223.092	141.809	66	61	0.5	84	15825	69	53	72	37	0	1.9	5.9	3.4	7	2.3	0.8	0.8	1.6	1	1.3	0	119	232	113	94.958
EE1DCD2D51	YK672	76732_4	76848_1	F	HIGH FAT	2021-04-13	3	11	50006	23681	26325	6721	6150.33	570.667	0.187319	0.748066	0.0686164	0.834843	0.118703	-0.0867763	623.694	137.54	86	69	1.9555	119	19327.5	46	37	56	22	0	1.9	7.1	6.2	11.4	4.4	1	1	2	0.9	1	0	122	288	166	136.066
EE1DCD2D52	YK645	76854_2	76841_1	M	LOW FAT	2021-03-30	3	15	35014	15034	19980	5319	4355	964	0.125769	0.833042	0.0490071	0.856383	0.0767617	-0.0233415	710.854	207.346	NA	61	0.7	82	12637.5	NA	NA	NA	NA	NA	2.1	7.9	7.25	3.65	3.4	1	1	2	1	1.3	0	114	316	202	177.193
EE1DCD2D53	YK679	76910_2	76856_1	M	LOW FAT	2021-04-22	4	12	NA	NA	NA	NA	NA	NA	0.16105	0.776133	0.0658416	0.862937	0.0952083	-0.0868043	822.707	239.282	110	91	1.5	96	16455	98	200	60	23	0	2	11.5	10.4	9	5	1.4	1.4	2.8	1.4	2	0	118	398	280	237.288
EE1DCD2D54	YK671	76732_4	76848_1	M	LOW FAT	2021-04-13	3	11	36887	16420	20467	4912.5	4800.33	112.167	0.135819	0.799693	0.0639339	0.851682	0.0718854	-0.0519889	585.157	202.835	97	80	NA	95	17085	93	89	57	33	0	1.9	11.4	8.4	8.1	3.8	1.1	1.1	2.2	1.1	1.6	3	132	370	238	180.303
EE1DCD2D55	YK640	76843_2	76812_1	F	LOW FAT	2021-03-28	3	13	40768	17517	23251	5906	5073.67	832.333	0.0829481	0.869966	0.0535135	0.852913	0.0294346	0.0170536	177.89	82.8639	NA	77	NA	81	13395	90	86	64	36	0	1.8	5.4	2.4	4.7	2	0.7	0.7	1.4	0.8	1.1	0	122	222	100	81.9672
EE1DCD2D56	YK642	76818_2	76854_1	F	HIGH FAT	2021-03-28	3	10	41022	15419	25603	5775.5	5040.67	734.833	0.17774	0.780631	0.0573746	0.847847	0.120365	-0.0672153	623.753	115.107	62	52	0.533333	104	21127.5	84	60	66	41	0	1.9	7.1	5	10.3	3.2	0.8	0.8	1.6	0.8	1.5	0	126	270	144	114.286
EE1DCD2D57	YK610	76796_2	76733_3	F	LOW FAT	2021-03-10	2	11	49920	23531	26389	6145	6335.33	-190.333	0.0949447	0.823681	0.072674	0.841832	0.0222707	-0.0181506	202.923	126.869	81	107	0.266667	79	12600	81	80	67	46	0	1.85	5.5	2.5	3.7	NA	0.85	0.8	1.65	NA	NA	0	106	231	125	117.925
EE1DCD2D58	YK691	76884_2	76838_1	M	LOW FAT	2021-04-27	4	11	41837	16938	24899	5403	5420	-17	0.103905	0.828274	0.0513514	0.847628	0.0525537	-0.0193536	463.275	172.022	105	99	0.3	95	22297.5	66	38	59	34	0	1.9	7.9	6	5.4	2.4	1	1	2	1.4	1.3	0	127	333	206	162.205
EE1DCD2D59	YK680	76910_2	76856_1	F	HIGH FAT	2021-04-22	4	12	NA	NA	NA	NA	NA	NA	0.103468	0.825088	0.0775627	0.833548	0.0259056	-0.00846067	254.298	162.896	79	71	NA	106	20265	76	49	55	28	0	1.8	7.1	3.8	6.5	3	0.9	0.8	1.7	0.9	1.5	0	103	252	149	144.66
EE1DCD2D5A	YK653	76819_2	76765_1	M	LOW FAT	2021-04-04	3	13	NA	NA	NA	NA	NA	NA	0.091781	0.843486	0.0411559	0.856935	0.050625	-0.0134498	529.458	177.828	98	96	0.9	100	15952.5	105	72	57	34	0	1.7	10.1	5.4	5.7	3.4	1.2	1.2	2.4	1.1	0.9	0	145	354	209	144.138
EE1DCD2D5B	YK682	76756_2	76776_1	F	LOW FAT	2021-04-22	4	11	NA	NA	NA	NA	NA	NA	NA	NA	NA	NA	NA	NA	NA	NA	NA	NA	NA	NA	NA	NA	NA	NA	NA	NA	NA	NA	NA	NA	NA	NA	NA	NA	NA	NA	0	NA	NA	NA	NA
EE1DCD2D5C	YK660	76821_2	77146_1	F	LOW FAT	2021-04-06	2	9	NA	NA	NA	NA	NA	NA	0.0768132	0.826648	0.0544815	0.860852	0.0223317	-0.0342035	185.112	94.1875	61	51	0.6	88	16485	NA	NA	NA	NA	NA	1.9	5.1	1.2	3	1.2	0.7	0.7	1.4	0.8	0.9	0	104	183	79	75.9615
EE1DCD2D5D	YK621	76911_2	76857_1	M	LOW FAT	2021-03-14	2	8	29305	11206	18099	4781	3488.33	1292.67	0.200646	0.743174	0.0698718	0.837462	0.130774	-0.0942877	823.339	185.337	107	94	3.437	103	20932.5	125	157	45	33	0	2	12.5	20.7	12.3	6.4	1.3	1.2	2.5	1.5	1.7	0	148	440	292	197.297
EE1DCD2D5E	YK703	76801_2	76884_1	M	LOW FAT	2021-05-03	4	9	36802	15301	21501	4985.5	4751	234.5	0.113171	0.823306	0.0620602	0.860394	0.051111	-0.0370872	368.557	145.869	106	85	1.7	93	15802.5	89	41	62	37	0	2.1	10.4	7.2	5.2	3.1	1.2	1.2	2.4	1.3	1.5	0	172	380	208	120.93
EE1DCD2D5F	YK670	77003_1	76889_1	F	HIGH FAT	2021-04-12	3	13	64265	29202	35063	8586	8679.67	-93.6667	0.0735312	0.854475	0.0572982	0.838877	0.016233	0.0155977	195.836	134.813	64	86	NA	99	19357.5	82	29	74	41	0	1.7	NA	2.2	5	1.6	0.8	0.8	1.6	0.8	1.2	1.5	106	241	135	127.358
EE1DCD2D60	YK656	76816_2	76887_1	F	HIGH FAT	2021-04-04	3	12	NA	NA	NA	NA	NA	NA	0.0932887	0.823259	0.0537908	0.846013	0.0394978	-0.0227541	280.863	113.701	71	83	0.4	97	16005	103	54	106	50	NA	1.8	7.4	2.6	4.8	2.3	0.7	0.7	1.4	0.8	1	1.5	111	235	124	111.712
EE1DCD2D61	YK638	76894_2	76844_1	F	LOW FAT	2021-03-27	3	9	53342	20098	33244	6182	7343	-1161	0.0742395	0.868657	0.0664912	0.825936	0.00774825	0.0427213	101.759	90.0485	NA	70	0.333333	89	13575	70	76	59	31	0	1.6	5.2	1.9	3.6	1.4	0.7	0.7	1.4	0.8	1.1	0	126	224	98	77.7778
EE1DCD2D62	YK667	76856_2	76732_3	M	LOW FAT	2021-04-12	3	13	37531	15001	22530	5284	4744	540	0.128556	0.802938	0.0599688	0.846417	0.068587	-0.0434798	575.169	198.774	82	74	2.2	87	17340	60	41	59	33	0	2	9	7.5	7.2	3.4	1.1	1.1	2.2	1	1.4	0	124	347	223	179.839
EE1DCD2D63	YK617	76793_2	76855_1	M	LOW FAT	2021-03-14	2	10	31320	12958	18362	4895.5	3613.67	1281.83	0.184391	0.756009	0.0761692	0.827289	0.108222	-0.0712797	577.466	155.739	97	90	2.1	114	20497.5	90	90	54	36	0	2	11.1	14.4	10.6	5.2	1.1	1	2.1	1.2	1.8	0	154	393	239	155.195
EE1DCD2D64	YK796	77404_2	77503_1	F	HIGH FAT	2021-06-26	2	6	NA	NA	NA	NA	NA	NA	0.0664322	0.847923	0.080506	0.826667	-0.0140738	0.0212563	46.6174	82.2473	61	52	0.3	87	16657.5	66	48	63	29	0	1.9	5.2	2.3	2.2	1.4	0.7	0.7	1.4	0.9	1.2	0	119	200	81	68.0672
EE1DCD2D65	YK802	76798_2	76911_1	M	HIGH FAT	2021-07-04	6	7	NA	NA	NA	NA	NA	NA	0.186207	0.750782	0.0839418	0.844365	0.102266	-0.0935828	590.136	176.63	130	76	4.7	128	22605	75	56	58	53	0	2.1	10.6	13.2	12	4.3	1.2	1.2	2.4	1.3	1.6	0	145	402	257	177.241
EE1DCD2D66	YK709	76847_2	76842_1	M	HIGH FAT	2021-05-08	4	8	NA	NA	NA	NA	NA	NA	0.199067	0.736132	0.0658201	0.833148	0.133247	-0.0970158	843.328	175.585	70	42	1.6	103	25035	74	103	69	49	0	2.2	10.7	12.9	10.7	5.3	1.2	1.2	2.4	1.3	1.9	0	138	397	259	187.681
EE1DCD2D67	YK782	77432_2	77664_1	F	HIGH FAT	2021-06-20	1	11	NA	NA	NA	NA	NA	NA	0.0929283	0.838318	0.0628667	0.848567	0.0300617	-0.0102489	216.331	111.415	60	73	0.433333	96	18232.5	48	39	79	58	0	1.8	6.5	2.6	5.6	2.4	0.8	0.8	1.6	0.9	1	0	145	243	98	67.5862
EE1DCD2D68	YK757	77578_2	77488_1	M	LOW FAT	2021-06-05	1	10	NA	NA	NA	NA	NA	NA	0.169874	0.758649	0.0868504	0.868084	0.0830233	-0.109435	428.256	136.031	76	82	0.5	98	15690	97	125	60	39	0	1.9	10.5	9.1	6.7	3.4	1.1	1.1	2.2	1.1	1.9	0	130	363	233	179.231
EE1DCD2D69	YK788	77434_2	77478_1	F	HIGH FAT	2021-06-21	2	10	NA	NA	NA	NA	NA	NA	0.125806	0.791625	0.0581481	0.846465	0.0676574	-0.0548396	424.493	126.718	66	71	0.366667	88	19612.5	86	71	49	47	0	1.9	7	3.4	6.1	1.9	0.9	0.9	1.8	1.1	1.4	0	128	261	133	103.906
EE1DCD2D6A	YK774	77412_2	77403_1	F	LOW FAT	2021-06-14	1	10	NA	NA	NA	NA	NA	NA	0.0468741	0.872178	0.0613514	0.851381	-0.0144773	0.0207964	54.8703	107.654	65	68	0.2	93	15952.5	40	39	60	26	0	1.9	6.7	1.6	3.9	2.5	0.8	0.7	1.5	1.5	1.4	0	125	242	117	93.6
EE1DCD2D6B	YK773	77668_2	77406_1	M	HIGH FAT	2021-06-14	1	10	NA	NA	NA	NA	NA	NA	0.145033	0.795261	0.0632527	0.855161	0.08178	-0.0598999	654.441	205.985	78	82	1.9	104	19507.5	62	58	65	47	0	2.1	13.9	13.1	12.6	6.3	1.5	1.5	3	1.6	1.2	3	150	433	283	188.667
EE1DCD2D6C	YK775	77668_2	77406_1	M	HIGH FAT	2021-06-14	2	9	NA	NA	NA	NA	NA	NA	0.0921294	0.845903	0.0319048	0.88631	0.0602246	-0.0404066	856.53	216.148	92	74	1.2	102	16890	86	40	51	50	0	2	8.7	7.4	8.3	3.8	1.5	1.4	2.9	1.6	1.9	3	135	400	265	196.296
EE1DCD2D6D	YK769	77666_2	77379_1	M	LOW FAT	2021-06-12	1	10	NA	NA	NA	NA	NA	NA	0.0915595	0.834571	0.0445397	0.861302	0.0470198	-0.0267302	448.182	158.391	62	61	0.7	84	17062.5	68	74	56	39	0	1.2	7.6	4.3	3.1	2.8	0.9	1	1.9	1	1.3	1	122	298	176	144.262
EE1DCD2D6E	YK780	76969_3	76753_1	F	LOW FAT	2021-06-20	6	3	NA	NA	NA	NA	NA	NA	0.141128	0.753101	0.145936	0.782164	-0.00480798	-0.0290626	70.5069	69.7645	47	58	1.85	76	14385	60	103	53	24	0	1.9	5.4	4	5.9	2.1	0.7	0.7	1.4	0.8	1	0	102	215	113	110.784
EE1DCD2D6F	YK713	76823_2	76751_1	M	LOW FAT	2021-05-11	3	10	NA	NA	NA	NA	NA	NA	0.0747204	0.861215	0.0411702	0.854468	0.0335502	0.00674697	498.536	232.391	105	92	0.9	96	17767.5	55	93	56	31	0	1.7	8.6	3.3	3.7	2.3	1.1	1.1	2.2	1.1	1.1	0	108	324	216	200
EE1DCD2D70	YK721	76794_2	76839_1	M	LOW FAT	2021-05-16	3	9	37430	15549	21881	5307.5	4050.33	1257.17	0.101254	0.829934	0.0545017	0.851649	0.0467524	-0.0217155	480.328	204.406	73	74	0.9	91	15637.5	82	110	55	29	0	1.9	8.6	6.5	4.2	3	1.1	1.1	2.2	1	1.3	0	113	325	212	187.611
EE1DCD2D71	YK799	76729_4	77197_1	M	HIGH FAT	2021-06-27	3	13	NA	NA	NA	NA	NA	NA	0.130509	0.795838	0.0288988	0.863274	0.10161	-0.0674355	1246.76	174.919	72	63	1.4	90	17340	83	105	58	50	0	2	8	9.1	2.5	2	1	0.9	1.9	0.9	1.3	0	128	343	215	167.969
EE1DCD2D72	YK762	77035_3	76801_1	F	HIGH FAT	2021-06-06	5	11	NA	NA	NA	NA	NA	NA	0.0805255	0.827147	0.0754403	0.867484	0.00508527	-0.0403371	123.551	99.6955	64	66	0.8	89	20137.5	81	47	64	34	0	1.9	6	2.2	4.2	1.7	0.9	0.8	1.7	0.8	1	0	120	234	114	95
EE1DCD2D73	YK797	77495_2	77411_1	M	HIGH FAT	2021-06-26	2	12	NA	NA	NA	NA	NA	NA	0.12144	0.816064	0.0389303	0.876468	0.0825094	-0.0604035	891.693	196.001	113	77	2.4	93	15472.5	56	62	53	51	0	2	11.4	8.3	7.3	5.9	1.3	1.3	2.6	1.3	1.2	0	158	433	275	174.051
EE1DCD2D74	YK728	76841_2	76770_1	F	LOW FAT	2021-05-19	4	10	63993	25168	38825	7644.5	8303.67	-659.167	0.150633	0.763179	0.0763551	0.850031	0.0742778	-0.0868525	336.965	98.8639	70	64	0.788	74	14610	68	58	44	22	0	1.9	7.3	4.2	10.3	2.9	0.8	0.9	1.7	0.7	1.4	2	122	269	147	120.492
EE1DCD2D75	YK784	76804_2	76858_1	F	HIGH FAT	2021-06-21	4	4	NA	NA	NA	NA	NA	NA	0.108443	0.819141	0.066789	0.840367	0.0416535	-0.0212258	241.117	104.785	82	64	0.266667	83	17700	78	42	97	70	0	NA	6.5	4.2	3.2	1.5	0.9	0.9	1.8	0.9	1.3	0	146	251	105	71.9178
EE1DCD2D76	YK801	77483_2	77415_1	M	HIGH FAT	2021-07-04	2	12	NA	NA	NA	NA	NA	NA	0.143617	0.792083	0.0388714	0.871155	0.104746	-0.0790715	993.856	169.19	132	79	1.9	96	19897.5	89	84	63	49	0	2	10.2	9.9	5.8	4.6	1.2	1.2	2.4	1.2	1.9	0	146	388	242	165.753
EE1DCD2D77	YK794	77486_2	77533_1	F	HIGH FAT	2021-06-26	2	8	NA	NA	NA	NA	NA	NA	0.089494	0.828333	0.0745646	0.827928	0.0149295	0.000405405	142.207	101.901	76	63	0.3	75	16065	92	79	97	39	0	1.8	7.1	2.8	5.8	1.7	0.8	0.9	1.7	1	1.2	0	131	228	97	74.0458
EE1DCD2D78	YK748	77488_2	77481_1	F	HIGH FAT	2021-05-30	1	13	49266	21412	27854	5955.5	6694.67	-739.167	0.112847	0.808111	0.052087	0.85513	0.0607603	-0.0470193	352.142	97.2205	68	63	NA	79	11707.5	53	50	56	29	0	1.8	6.8	3.2	5.7	2	0.9	0.8	1.7	0.9	1.3	0	127	254	127	100
EE1DCD2D79	YK754	77453_2	77670_1	F	LOW FAT	2021-06-05	1	11	NA	NA	NA	NA	NA	NA	0.0469787	0.869557	0.0730241	0.874983	-0.0260454	-0.00542617	34.6353	107.981	87	83	NA	72	14482.5	56	54	66	24	0	1.8	4.9	1.6	2.7	1.9	0.7	0.7	1.4	0.9	0.9	0	108	221	113	104.63
EE1DCD2D7A	YK761	77035_3	76801_1	M	LOW FAT	2021-06-06	5	11	NA	NA	NA	NA	NA	NA	0.097806	0.828691	0.0764738	0.870386	0.0213322	-0.0416945	274.171	178.547	98	89	1.7	99	18765	110	117	217	175	0	2	10.9	6.9	7.9	2.7	1.2	1.3	2.5	1.2	1.2	0	140	370	230	164.286
EE1DCD2D7B	YK732	77470_2	77457_1	F	LOW FAT	2021-05-22	1	9	48745	19720	29025	7670.5	6152.67	1517.83	0.0961167	0.821867	0.0802564	0.826859	0.0158603	-0.00499231	130.312	91.1466	71	69	NA	98	15592.5	72	63	59	30	0	1.8	6	2.7	4.7	2.1	0.6	0.6	1.2	0.9	1.2	0	115	219	104	90.4348
EE1DCD2D7C	YK768	77452_2	77420_1	F	LOW FAT	2021-06-12	1	9	NA	NA	NA	NA	NA	NA	0.0806373	0.84299	0.0580528	0.858746	0.0225844	-0.0157557	180.557	98.2744	76	65	0.3	77	12217.5	51	39	87	53	0	1.8	5.5	3.2	2.6	0.6	0.8	0.8	1.6	0.9	0.7	0	112	223	111	99.1071
EE1DCD2D7D	YK723	76837_2	76845_1	M	LOW FAT	2021-05-16	4	6	46372	19155	27217	5897.5	5838.33	59.1667	0.0691501	0.857677	0.0421144	0.877637	0.0270357	-0.0199598	332.546	157.442	98	99	0.7	94	15735	66	31	69	53	0	2	10.1	4.8	4.3	3.4	1.8	NA	NA	1.1	1.1	0	156	384	228	146.154
EE1DCD2D7E	YK715	76802_2	76748_1	M	LOW FAT	2021-05-11	4	10	NA	NA	NA	NA	NA	NA	0.103271	0.825635	0.0545192	0.849103	0.0487516	-0.0234671	482.834	199.188	95	92	0.6	92	18667.5	35	68	54	28	0	1.8	9.6	4.9	5.1	2.1	1.2	1.1	2.3	1.2	1.5	0	125	338	213	170.4
EE1DCD2D7F	YK730	77476_2	77495_1	F	LOW FAT	2021-05-22	1	7	38198	13964	24234	5173	4632.33	540.667	0.1109	0.798383	0.0503976	0.85789	0.0605024	-0.0595066	303.762	70.7589	56	54	NA	95	13965	56	58	63	29	0	1.8	5.9	2.5	5.1	2.1	0.7	0.7	1.4	0.8	0.8	0	119	215	96	80.6723
EE1DCD2D80	YK736	76730_6	76796_1	F	HIGH FAT	2021-05-23	5	6	66739	21440	45299	8740	8744.33	-4.33333	0.153641	0.760215	0.0997971	0.805565	0.0538435	-0.0453502	190.502	78.0728	46	46	NA	90	17145	41	40	51	35	0	2	6.4	3.4	7.4	1.5	0.9	0.9	1.8	0.8	1.3	0	126	246	120	95.2381
EE1DCD2D83	YK706	76753_2	76802_1	F	LOW FAT	2021-05-03	4	12	48385	18480	29905	7431.5	5895.67	1535.83	0.0332397	0.878689	0.0422344	0.86978	-0.00899473	0.00890892	53.9462	97.6079	67	77	0.15	95	15322.5	46	81	48	25	0	1.8	5.9	0.8	2.2	1.1	0.6	0.6	1.2	0.8	1	0	106	197	91	85.8491
EE1DCD2D84	YK764	77217_2	76847_1	F	HIGH FAT	2021-06-07	3	8	NA	NA	NA	NA	NA	NA	0.109321	0.797484	0.07375	0.855744	0.0355708	-0.0582598	250.726	120.499	77	74	NA	102	22515	32	38	56	30	0	1.9	8.5	3.4	6.7	2.3	1	1	2	1.2	1.8	2	125	282	157	125.6
EE1DCD2D85	YK739	77407_2	77410_1	M	LOW FAT	2021-05-23	1	10	NA	NA	NA	NA	NA	NA	0.158993	0.774652	0.0635897	0.856809	0.0954029	-0.0821571	677.867	181.28	99	90	1.4	89	17857.5	77	73	51	33	0	2	11.8	9.8	7.6	4.3	1.3	1.3	2.6	1.2	1.3	2	135	372	237	175.556
EE1DCD2D86	YK760	77425_2	77577_1	F	HIGH FAT	2021-06-06	1	11	NA	NA	NA	NA	NA	NA	0.114851	0.806993	0.0508696	0.893659	0.0639815	-0.0866665	476.709	130.663	76	73	0.333333	89	17572.5	40	49	74	41	0	1.8	6	2.9	5.4	2.4	0.8	0.8	1.6	1.5	1.2	0	101	245	144	142.574
EE1DCD2D87	YK731	77470_2	77457_1	M	HIGH FAT	2021-05-22	1	9	36820	20051	16769	4612	4689.33	-77.3333	0.193151	0.73925	0.0633333	0.848161	0.129818	-0.108911	764.973	147.202	71	52	2.3	98	15405	74	81	58	67	0	2.1	8.6	12.7	9.2	3.9	1.1	1.1	2.2	1.2	1.7	0	131	344	213	162.595
EE1DCD2D88	YK765	77409_2	77668_1	M	HIGH FAT	2021-06-12	1	4	NA	NA	NA	NA	NA	NA	0.109064	0.829449	0.0375	0.883548	0.0715639	-0.0540996	793.62	188.445	80	60	1	83	17820	87	72	59	57	0	2	9.2	8	6.8	2.3	1.2	1.2	2.4	1.3	1.4	0	145	388	243	167.586
EE1DCD2D89	YK741	76815_2	76747_1	M	HIGH FAT	2021-05-29	5	5	38759	14125	24634	5160.5	5282.67	-122.167	0.197174	0.737961	0.0601089	0.874052	0.137066	-0.136092	772.599	124.594	73	73	2.7	115	22470	106	125	47	21	0	2.1	12.8	13.4	10.5	5.6	1.4	1.3	2.7	1.2	1.4	3	171	429	258	150.877
EE1DCD2D8B	YK752	77577_2	77504_1	F	LOW FAT	2021-05-31	1	10	NA	NA	NA	NA	NA	NA	0.0969085	0.815751	0.0603901	0.851773	0.0365184	-0.0360218	229.477	96.6361	64	61	0.3	83	18262.5	71	NA	73	26	NA	1.8	5.7	2	3.3	1.5	0.8	0.7	1.5	0.8	1	0	102	204	102	100
EE1DCD2D8C	YK720	77403_2	77412_1	F	LOW FAT	2021-05-19	1	11	59483	24290	35193	9093	6953.67	2139.33	0.0833155	0.828093	0.0711828	0.828387	0.0121327	-0.000294405	135.347	101.004	40	51	NA	98	17985	58	60	50	34	0	1.8	5.3	3.7	2.6	1.3	0.7	0.7	1.4	0.8	1.1	0	105	206	101	96.1905
EE1DCD2D8D	YK793	77486_2	77533_1	M	LOW FAT	2021-06-26	2	8	NA	NA	NA	NA	NA	NA	0.118373	0.805291	0.0492835	0.86	0.06909	-0.0547088	645.259	190.542	99	86	2.4	106	16110	84	157	60	37	0	2.1	11	7.4	7.5	4	1.3	1.4	2.7	1.3	1.4	0	125	332	207	165.6
EE1DCD2D8E	YK803	77426_2	77671_1	M	LOW FAT	2021-07-05	2	8	NA	NA	NA	NA	NA	NA	0.168759	0.769156	0.0646995	0.848306	0.10406	-0.0791497	761.613	199.507	123	110	4.1	109	18217.5	118	174	60	38	0	2	12	13.1	8.6	5.6	1.3	1.3	2.6	1.2	1.7	2	145	412	267	184.138
EE1DCD2D8F	YK747	77488_2	77481_1	M	LOW FAT	2021-05-30	1	13	53615	23498	30117	7578.5	6173.67	1404.83	0.132348	0.79482	0.0442373	0.868983	0.0881112	-0.074163	792.465	172.846	74	59	1.9	88	18517.5	74	168	58	23	0	1.5	10.3	8.2	7.6	3.3	1	1	2	1.1	1.5	0	133	364	231	173.684
EE1DCD2D90	YK791	77420_2	77381_1	M	HIGH FAT	2021-06-26	2	11	NA	NA	NA	NA	NA	NA	0.122252	0.81672	0.0418579	0.870191	0.0803941	-0.053471	792.95	186.951	101	86	2.2	114	22215	99	87	74	53	0	2.2	8.1	8.2	7.4	4.6	NA	1.9	NA	1.1	1.6	0	140	383	243	173.571
EE1DCD2D91	YK746	77402_2	77483_1	F	HIGH FAT	2021-05-30	1	10	49985	23736	26249	5903.5	7323.67	-1420.17	0.156925	0.750503	0.0817544	0.821433	0.0751709	-0.0709299	290.629	85.936	63	55	NA	96	16522.5	83	55	58	34	0	1.2	7.9	5.3	9	3.1	0.8	0.8	1.6	0.8	1.2	0	121	266	145	119.835
EE1DCD2D92	YK770	77414_2	77665_1	F	HIGH FAT	2021-06-12	1	10	NA	NA	NA	NA	NA	NA	0.0855657	0.830183	0.0605387	0.856465	0.025027	-0.0262812	211.235	113.445	61	58	0.4	107	17595	73	32	65	62	0	1.7	6.1	1.5	3.2	1.2	0.9	0.7	1.6	0.3	0.6	0	112	234	122	108.929
EE1DCD2D93	YK795	77404_2	77503_1	M	LOW FAT	2021-06-26	2	6	NA	NA	NA	NA	NA	NA	0.151217	0.781281	0.0500952	0.862	0.101122	-0.0807192	803.422	171.26	138	124	1.9	102	19672.5	66	139	50	32	0	2.2	13.2	10.5	9.7	6.2	1.2	1.2	2.4	1.4	1.8	0	162	431	269	166.049
EE1DCD2D94	YK778	77496_2	77494_1	F	LOW FAT	2021-06-19	2	9	NA	NA	NA	NA	NA	NA	0.0625355	0.840957	0.0632653	0.861633	-0.000729845	-0.0206752	89.6237	87.2335	60	69	0.233333	73	15900	79	63	56	25	0	1.8	5.7	1.5	3.2	1.2	0.7	0.7	1.4	0.8	1.1	0	102	206	104	101.961
EE1DCD2D95	YK733	77454_2	77450_1	M	LOW FAT	2021-05-22	1	9	34241	14629	19612	4434	4287.33	146.667	0.150297	0.784686	0.0775956	0.841093	0.0727014	-0.0564064	381.056	131.705	70	68	2.8	90	17085	98	133	56	39	0	1.9	7.6	7.4	5.6	3.4	0.9	0.9	1.8	1.1	1.3	0	139	308	169	121.583
EE1DCD2D96	YK779	76969_3	76753_1	M	HIGH FAT	2021-06-20	6	3	NA	NA	NA	NA	NA	NA	0.182337	0.746397	0.0801462	0.822251	0.102191	-0.0758548	614.447	185.065	83	67	1.7	80	19245	90	78	56	35	0	2	10.5	9.4	9.5	4.3	1.3	1.3	2.6	1.1	1.5	0	150	375	225	150
EE1DCD2D97	YK755	77379_2	77496_1	M	HIGH FAT	2021-06-05	1	10	NA	NA	NA	NA	NA	NA	0.14876	0.786149	0.0427119	0.900989	0.106048	-0.114839	1098.35	200.213	92	85	0.5	111	19395	48	82	57	39	0	2	12.7	13.2	13.1	5.2	1.3	1.3	2.6	1.1	1.9	2	137	432	295	215.328
EE1DCD2D98	YK772	77414_2	77665_1	F	HIGH FAT	2021-06-14	2	12	NA	NA	NA	NA	NA	NA	0.0629514	0.857483	0.0485227	0.865455	0.0144287	-0.00797191	183.06	116.172	56	59	0.6	87	17062.5	66	51	52	37	0	1.8	6.3	1.1	3.3	1.1	0.8	0.8	1.6	0.7	1	0	96	213	117	121.875
EE1DCD2D99	YK737	76757_2	76794_1	M	LOW FAT	2021-05-23	5	3	49130	19131	29999	6606	5928	678	0.104356	0.822576	0.0392284	0.888426	0.0651276	-0.0658497	735.012	190.624	109	93	0.4	91	14662.5	70	119	49	33	0	2	9.8	6.2	6.5	3.2	1.2	1.2	2.4	1.2	1.7	0	128	363	235	183.594
EE1DCD2D9A	YK711	76775_2	77217_1	M	HIGH FAT	2021-05-10	1	10	NA	NA	NA	NA	NA	NA	0.222095	0.721706	0.0648348	0.845646	0.157261	-0.123939	1063.46	189.862	86	74	2.2	97	18690	60	40	62	49	0	1.9	10.5	14.8	11.2	4.6	1.1	1.1	2.2	1.2	1.7	0	132	386	254	192.424
EE1DCD2D9B	YK786	77406_2	77405_1	F	HIGH FAT	2021-06-21	2	8	NA	NA	NA	NA	NA	NA	0.0520379	0.863902	0.0561565	0.849966	-0.00411855	0.0139361	99.5154	118.836	61	63	0.333333	89	17550	60	42	177	114	0	1.7	6.7	1.6	2.7	1.2	0.5	0.5	1	0.8	1.3	0	83	236	153	184.337
EE1DCD2D9C	YK742	76815_2	76747_1	F	LOW FAT	2021-05-29	5	5	45123	20246	24877	6204	6076.33	127.667	0.0829187	0.816434	0.0537006	0.852712	0.0292182	-0.0362774	163.019	63.0922	57	63	0.266667	80	18907.5	95	83	74	21	NA	1.9	6	2.3	3.8	2	0.7	0.7	1.4	0.8	1.1	0	125	222	97	77.6
EE1DCD2D9D	YK743	77082_2	76912_1	M	HIGH FAT	2021-05-30	5	12	29865	10965	18900	4550.5	3576	974.5	0.21787	0.716041	0.0592063	0.857566	0.158664	-0.141525	1097.41	171.696	95	77	2.8	96	20977.5	127	233	54	48	0	1.9	9.9	13.8	10.3	5.7	1.1	1	2.1	1.2	1.6	2	145	415	270	186.207
EE1DCD2D9E	YK749	77665_2	77508_1	M	HIGH FAT	2021-05-31	1	8	32555	13385	19170	4339.5	4095.33	244.167	0.194633	0.753442	0.0793736	0.842931	0.11526	-0.0894884	655.383	175.35	87	74	1.4	100	22260	80	67	65	37	0	2.1	10.3	17.9	14.9	5.9	1.3	1.3	2.6	1.5	1.3	1	168	471	303	180.357
EE1DCD2D9F	YK745	77402_2	77483_1	M	LOW FAT	2021-05-30	1	10	43462	19042	24420	4986.5	5608.67	-622.167	0.0255556	0.901278	0.0292063	0.881376	-0.00365079	0.0199021	108.333	143.472	120	138	1.117	100	14850	78	60	55	22	0	2.2	7.4	2.4	2.9	1.9	1.1	1.2	2.3	1.1	1.4	0	141	344	203	143.972
EE1DCD2DA0	YK714	76823_2	76751_1	F	HIGH FAT	2021-05-11	3	10	NA	NA	NA	NA	NA	NA	0.0291667	0.880736	0.0505417	0.838042	-0.021375	0.0426948	24.0725	125.953	52	46	NA	74	14835	52	54	59	44	0	1.7	4.6	0.8	1.3	0.8	0.7	0.7	1.4	0.7	0.9	0	91	180	89	97.8022
EE1DCD2DA1	YK759	77425_2	77577_1	M	LOW FAT	2021-06-06	1	11	NA	NA	NA	NA	NA	NA	0.0870637	0.851348	0.0437432	0.902213	0.0433205	-0.050865	488.944	179.219	104	93	0.9	86	16627.5	55	100	159	140	0	2.1	11.8	7.2	3.2	3.6	1.2	1.2	2.4	1.2	1.3	0	121	390	269	222.314
EE1DCD2DA2	YK719	77403_2	77412_1	M	HIGH FAT	2021-05-19	1	11	85556	39461	46095	7115	14857.7	-7742.67	0.104522	0.823689	0.0747967	0.826992	0.0297256	-0.00330285	458.967	298.402	77	77	1.3	108	17122.5	51	36	67	57	0	2	10.1	5.9	7.1	2.9	1.1	1	2.1	1.1	1.3	0	93	362	269	289.247
EE1DCD2DA3	YK735	76730_6	76796_1	M	LOW FAT	2021-05-23	5	6	NA	NA	NA	NA	NA	NA	0.0992898	0.834574	0.0872431	0.832356	0.0120467	0.00221797	201.207	165.367	103	67	1.5	106	17092.5	119	123	50	37	0	2	10.8	6	4.7	2.5	1.3	1.2	2.5	1.1	1.5	0	151	369	218	144.371
EE1DCD2DA4	YK744	77082_2	76912_1	F	LOW FAT	2021-05-30	5	12	38049	18147	19902	5433	4890.67	542.333	0.0958998	0.826009	0.0497312	0.86672	0.0461687	-0.040711	231.243	63.7057	58	62	0.466667	80	18495	64	NA	44	18	NA	1.9	6.1	2.3	4.8	1.4	0.9	0.9	1.8	0.9	1.4	0	132	231	99	75
EE1DCD2DA5	YK708	76855_2	76799_1	F	LOW FAT	2021-05-03	4	14	72485	32965	39520	11907	8372	3535	0.0672063	0.848159	0.0657	0.8367	0.00150635	0.0114587	114.815	112.876	86	92	0.733333	70	12600	100	143	54	35	0	1.9	6.6	2.4	4.7	1.8	0.8	0.8	1.6	0.8	0.9	0	117	239	122	104.274
EE1DCD2DA6	YK787	77434_2	77478_1	M	LOW FAT	2021-06-21	2	10	NA	NA	NA	NA	NA	NA	0.226206	0.711413	0.0550529	0.852778	0.171153	-0.141365	1269.63	178.077	125	94	3.583	128	21345	115	187	52	29	0	2	14	15.4	13.1	6.6	1.3	1.3	2.6	1.6	1.9	0	131	434	303	231.298
EE1DCD2DA7	YK751	77577_2	77504_1	M	HIGH FAT	2021-05-31	1	10	47727	18256	29471	6698	6074.67	623.333	0.143825	0.78187	0.054932	0.856463	0.0888934	-0.074593	624.025	152.446	69	60	0.9	96	20730	73	63	70	45	0	1.9	6.8	8.2	4.4	3.2	1	0.9	1.9	0.8	0.6	0	106	286	180	169.811
EE1DCD2DA8	YK756	77379_2	77496_1	F	LOW FAT	2021-06-05	1	10	NA	NA	NA	NA	NA	NA	0.0462434	0.839859	0.0427063	0.885413	0.00353712	-0.0455536	102.628	77.5011	67	71	NA	83	14175	40	39	72	29	0	NA	6.5	1.6	1.2	0.8	0.8	0.8	1.6	0.9	1	0	112	212	100	89.2857
EE1DCD2DA9	YK753	77453_2	77670_1	M	HIGH FAT	2021-06-05	1	11	NA	NA	NA	NA	NA	NA	0.126019	0.794317	0.0498947	0.88386	0.0761238	-0.0895425	665.682	172.445	78	66	2.2	93	15270	82	61	64	53	0	1.8	7.8	5.8	5.3	2.6	1	1	2	1	1.1	0	111	305	194	174.775
EE1DCD2DAA	YK710	76847_2	76842_1	F	LOW FAT	2021-05-08	4	8	NA	NA	NA	NA	NA	NA	0.103719	0.812469	0.0576751	0.843529	0.0460441	-0.0310603	226.421	74.829	77	55	NA	78	18337.5	64	38	59	29	0	1.9	5.6	2.7	5	2	0.7	0.8	1.5	0.8	1.3	0	129	219	90	69.7674
EE1DCD2DAB	YK783	76804_2	76858_1	M	LOW FAT	2021-06-21	4	4	NA	NA	NA	NA	NA	NA	0.138316	0.78014	0.0966915	0.820373	0.0416243	-0.0402335	307.795	171.094	80	55	1.5	87	13665	100	93	62	43	0	2.1	10.6	9.7	5.7	4.1	1.1	1.4	2.5	1.2	1.7	0	118	386	268	227.119
EE1DCD2DAC	YK790	77477_2	77456_1	F	LOW FAT	2021-06-26	2	13	NA	NA	NA	NA	NA	NA	0.0333776	0.87944	0.0578237	0.843168	-0.0244461	0.0362715	7.81324	94.8116	70	79	0.133333	89	14580	NA	NA	NA	NA	NA	1.9	6.8	1.5	2.6	2	0.8	0.8	1.6	1	1.2	0	138	236	98	71.0145
EE1DCD2DAD	YK740	77407_2	77410_1	F	HIGH FAT	2021-05-23	1	10	65761	23662	42099	8462	8686.67	-224.667	0.0982399	0.825997	0.0428431	0.855098	0.0553967	-0.0291012	381.083	102.664	64	65	NA	96	19995	57	30	58	41	0	1.9	6.5	4.2	2.5	1.5	0.7	0.8	1.5	0.8	0.9	0	112	234	122	108.929
EE1DCD2DAE	YK781	77432_2	77664_1	M	LOW FAT	2021-06-20	1	11	NA	NA	NA	NA	NA	NA	0.145971	0.786618	0.0645763	0.852627	0.0813942	-0.0660096	679.659	218.212	118	87	1.5	121	22672.5	76	97	56	48	0	2	13.1	10.6	8.2	6	1.3	1.3	2.6	1.2	1.7	0	111	420	309	278.378
EE1DCD2DAF	YK777	77496_2	77494_1	M	HIGH FAT	2021-06-19	2	9	NA	NA	NA	NA	NA	NA	0.209868	0.727081	0.06	0.849101	0.149868	-0.12202	1049.71	181.46	80	63	3	103	18592.5	98	103	52	29	0	1.8	9.2	12.5	11.3	6.2	1	1	2	1.1	1.2	0	149	386	237	159.06
EE1DCD2DB0	YK738	76757_2	76794_1	F	HIGH FAT	2021-05-23	5	3	58797	23148	35649	7716.5	7941	-224.5	0.0643537	0.850119	0.0415447	0.879512	0.022809	-0.0293931	270.254	131.036	55	54	NA	97	16920	51	33	94	59	0	1.8	5.6	1.5	3.2	1.4	0.7	0.8	1.5	0.9	1	0	95	210	115	121.053
EE1DCD2DB1	YK789	77477_2	77456_1	M	HIGH FAT	2021-06-26	2	13	NA	NA	NA	NA	NA	NA	0.132108	0.800908	0.0558133	0.857653	0.0762946	-0.056745	636.598	190.61	101	88	1.1	98	18480	74	70	62	54	0	2	12.5	9.3	12.2	5.3	1.3	1.3	2.6	1.1	1.4	0	153	404	251	164.052
EE1DCD2DB2	YK767	77409_2	77668_1	M	HIGH FAT	2021-06-12	1	9	NA	NA	NA	NA	NA	NA	0.140602	0.799838	0.0574074	0.850912	0.0831946	-0.0510734	676.625	198.061	78	71	1.5	106	20265	66	79	61	49	0	1.4	9.6	9.6	8.6	3.4	0.8	1	1.8	0.9	1	2	135	384	249	184.444
EE1DCD2DB3	YK734	77454_2	77450_1	F	HIGH FAT	2021-05-22	1	9	51217	23069	28148	7265.5	6677	588.5	0.0863388	0.8349	0.0589899	0.84899	0.0273489	-0.0140901	170.548	81.7807	48	48	NA	96	13095	72	27	54	36	0	1.8	5.9	2.4	4.5	1.4	0.7	0.7	1.4	0.8	1.3	0	106	209	103	97.1698
EE1DCD2DB4	YK722	76794_2	76839_1	F	HIGH FAT	2021-05-16	3	9	55932	25700	30232	7281.5	7477	-195.5	0.0749907	0.809423	0.0418315	0.857546	0.0331592	-0.0481231	252.627	85.6649	50	49	0.3	81	14775	44	59	66	45	0	1.8	4.6	1.7	1.8	1.1	0.7	0.7	1.4	0.7	0.9	0	101	189	88	87.1287
EE1DCD2DB5	YK800	76729_4	77197_1	F	LOW FAT	2021-06-27	3	13	NA	NA	NA	NA	NA	NA	0.0321495	0.879579	0.0419551	0.867372	-0.0098056	0.0122076	57.6776	108.665	71	64	0.733333	82	17602.5	61	41	62	38	0	1.7	5.9	1.1	2.6	1.1	0.7	0.7	1.4	0.8	1.1	0	118	219	101	85.5932
EE1DCD2DB6	YK766	77452_2	77420_1	F	LOW FAT	2021-06-12	1	4	NA	NA	NA	NA	NA	NA	0.0814853	0.849689	0.0480065	0.863595	0.0334788	-0.0139057	221.171	86.1689	50	52	0.266667	93	14617.5	68	73	66	36	0	1.7	4.8	2.2	5.7	1.3	0.7	0.7	1.4	0.7	1.1	0	115	218	103	89.5652
EE1DCD2DB7	YK792	77420_2	77381_1	F	LOW FAT	2021-06-26	2	11	NA	NA	NA	NA	NA	NA	0.0398049	0.862634	0.0535942	0.86029	-0.0137893	0.00234429	32.3959	78.7466	82	74	0.15	70	14317.5	63	53	68	32	0	2	6	1.1	3	1.5	0.8	0.7	1.5	0.9	1.2	0	128	218	90	70.3125
EE1DCD2DB8	YK750	77665_2	77508_1	F	LOW FAT	2021-05-31	1	8	60597	27538	33059	7494.5	7778.33	-283.833	0.0587931	0.844195	0.05	0.864271	0.0087931	-0.0200754	113.125	77.0399	73	78	0.1	86	17385	75	42	62	27	0	2	6.4	2.1	3.6	1.3	0.8	0.9	1.7	0.9	1.1	0	135	241	106	78.5185
EE1DCD2DB9	YK776	77412_2	77403_1	F	LOW FAT	2021-06-14	2	9	NA	NA	NA	NA	NA	NA	0.0374127	0.86254	0.0433333	0.855579	-0.00592063	0.00696074	90.8502	122.851	74	86	0.2	87	13282.5	60	47	60	25	0	1.7	6.2	1.2	2.1	1.1	0.9	1	1.9	0.7	0.6	0	106	236	130	122.642
EE1DCD2DBA	YK729	77476_2	77495_1	M	HIGH FAT	2021-05-22	1	7	35411	18857	16554	4765.5	4239.67	525.833	0.184322	0.75639	0.0551969	0.854094	0.129126	-0.0977048	786.115	134.999	62	64	3.8	89	16395	70	67	57	46	0	1.9	8.5	12.2	7	4.7	1	1	2	1	1.5	0	142	353	211	148.592
EE1DCD2DBB	YK712	76775_2	77217_1	F	LOW FAT	2021-05-10	1	10	NA	NA	NA	NA	NA	NA	0.0566667	0.853297	0.0528315	0.848746	0.00383513	0.00455138	111.058	97.8294	89	69	NA	81	12607.5	79	113	58	39	0	1.8	4.7	1.7	1.5	1.1	0.6	0.6	1.2	0.9	0.8	0	103	187	84	81.5534
EE1DCD2DBC	YK726	77480_2	77476_1	F	LOW FAT	2021-05-19	1	12	57284	23311	33973	7355.5	6745.33	610.167	0.0757601	0.837378	0.0754902	0.831451	0.000269915	0.00592698	182.182	183.181	88	89	NA	76	13290	53	44	45	21	0	1.8	8.3	2.2	4.6	2.3	1	0.9	1.9	1	1.2	0	99	270	171	172.727
EE1DCD2DBD	YK798	77495_2	77411_1	F	LOW FAT	2021-06-26	2	12	NA	NA	NA	NA	NA	NA	0.0261574	0.878889	0.032716	0.863981	-0.00655864	0.0149074	59.9057	103.451	92	85	0.166667	55	14557.5	50	39	68	32	0	1.8	6.1	1	2.1	1.8	0.7	0.7	1.4	0.8	1	0	124	214	90	72.5806
EE1DCD2DBE	YK763	77217_2	76847_1	M	LOW FAT	2021-06-07	3	8	NA	NA	NA	NA	NA	NA	0.148229	0.781362	0.0882677	0.85294	0.0599615	-0.0715775	450.074	200.071	124	116	0.8	108	18577.5	80	128	59	29	0	2	13.8	11.5	11.4	4.3	1.5	1.5	3	1.7	2.2	1	148	446	298	201.351
EE1DCD2DBF	YK725	77480_2	77476_1	M	HIGH FAT	2021-05-19	1	12	54520	16346	38174	7238.5	7473.33	-234.833	0.151484	0.784648	0.0512745	0.870098	0.100209	-0.0854502	928.235	213.859	76	56	NA	96	23805	109	100	101	49	0	2.1	10	8.2	8.6	3.7	1.2	1.2	2.4	1.2	1.7	0	127	373	246	193.701
EE1DCD2DC0	YK717	76728_5	76885_1	M	HIGH FAT	2021-05-16	3	11	43818	21176	22642	5336.5	6258.33	-921.833	0.0926398	0.83066	0.0436996	0.862784	0.0489402	-0.0321239	594.216	215.28	84	64	0.652	96	15810	NA	NA	NA	NA	NA	1.6	9.3	5	4	2.7	1	1	2	1	1.3	0	105	313	208	198.095
EE1DCD2DC1	YK727	76841_2	76770_1	M	HIGH FAT	2021-05-19	4	10	36187	12539	23648	4655.5	5040.67	-385.167	0.131873	0.803071	0.0651111	0.845833	0.0667615	-0.0427622	651.067	252.085	83	62	1	110	19762.5	93	79	61	44	0	2	12.4	11.8	11.2	5.7	1.3	1.3	2.6	1.3	1.9	0	141	473	332	235.461
EE1DCD2DC2	YK758	77578_2	77488_1	F	HIGH FAT	2021-06-05	1	10	NA	NA	NA	NA	NA	NA	0.102821	0.801704	0.0526923	0.894936	0.0501282	-0.0932315	314.659	90.3624	66	62	NA	88	18480	65	55	57	35	0	1.8	5.7	2.5	3.9	1.3	0.7	0.7	1.4	0.9	1.2	0	116	227	111	95.6897
EE1DCD2DC3	YK718	76728_5	76885_1	F	LOW FAT	2021-05-16	3	11	57804	19390	38414	7906.5	8304.33	-397.833	0.0264931	0.902135	0.0342593	0.869111	-0.0077662	0.0330243	64.973	121.44	66	60	NA	87	17010	NA	NA	NA	NA	NA	1.7	5.3	1.3	2.7	1.3	0.7	0.7	1.4	0.7	0.9	0	101	213	112	110.891
EE1DCD2DC4	YK785	77406_2	77405_1	M	LOW FAT	2021-06-21	2	8	NA	NA	NA	NA	NA	NA	0.107793	0.827288	0.0504533	0.870027	0.0573395	-0.0427384	532.4	181.46	89	83	1.7	103	18682.5	98	110	83	51	0	2	10.9	6.9	5.3	3.4	1.1	1.1	2.2	1.4	1.9	0	130	388	258	198.462
EE1DCD2DC5	YK724	76837_2	76845_1	F	HIGH FAT	2021-05-16	4	6	60005	26856	33149	7876	7687	189	0.0304651	0.866609	0.0460507	0.842899	-0.0155856	0.02371	23.6821	92.2154	52	50	NA	89	15750	57	81	59	27	0	1.7	5.4	1	1	1.1	0.6	0.6	1.2	0.7	1.1	0	102	200	98	96.0784
EE1DCD2DC6	YK771	77666_2	77379_1	M	LOW FAT	2021-06-14	2	12	NA	NA	NA	NA	NA	NA	0.0827292	0.850729	0.050462	0.858779	0.0322671	-0.00804971	419.424	213.862	103	98	1.2	75	15870	76	104	57	32	0	2	9.7	4.8	3.8	2.3	1.2	1.2	2.4	1	0.9	0	118	345	227	192.373
EE1DCD2DC7	YK716	76802_2	76748_1	F	HIGH FAT	2021-05-11	4	10	NA	NA	NA	NA	NA	NA	0.0841794	0.838832	0.0610653	0.847835	0.0231141	-0.00900256	179.966	100.936	64	58	NA	71	15105	64	59	58	32	0	1.8	5.6	1.8	4.6	1.2	0.8	0.7	1.5	0.8	1	0	106	203	97	91.5094
EE1DCD2DC8	YK812	76888_2	76752_1	F	LOW FAT	2021-07-11	6	5	NA	NA	NA	NA	NA	NA	0.0868627	0.841729	0.0667361	0.844722	0.0201266	-0.00299317	153.538	94.1014	50	49	0.4	76	14115	67	92	72	44	0	1.9	5	1.7	3.3	1.9	NA	1.1	NA	0.8	1.2	0	105	193	88	83.8095
EE1DCD2DC9	YK805	77371_2	77661_1	M	LOW FAT	2021-07-05	2	10	NA	NA	NA	NA	NA	NA	0.1738	0.758077	0.0514286	0.85591	0.122372	-0.0978338	913.834	165.709	98	56	1	104	16125	123	163	76	51	0	2	11.6	8.3	5.5	3	1.1	1.1	2.2	1.2	1.3	3	138	352	214	155.072
EE1DCD2DCA	YK823	77478_2	77546_1	M	HIGH FAT	2021-07-19	3	13	NA	NA	NA	NA	NA	NA	0.125829	0.819055	0.0503672	0.868588	0.0754616	-0.0495323	691.812	198.875	87	63	1.2	104	20820	92	94	78	73	0	1.9	9.6	10.3	9	NA	1.1	1	2.1	1.5	1.4	0	139	389	250	179.856
EE1DCD2DCB	YK819	77643_1	77477_1	M	HIGH FAT	2021-07-13	2	11	NA	NA	NA	NA	NA	NA	0.177331	0.763661	0.0738272	0.840216	0.103504	-0.0765552	669.523	191.18	76	66	0.6	94	17122.5	78	75	67	63	0	1.8	8.7	11.1	11	3.8	1	1	2	1.4	1.8	0	126	358	232	184.127
EE1DCD2DCC	YK846	77663_2	77376_3	F	LOW FAT	2021-07-28	2	10	NA	NA	NA	NA	NA	NA	0.0465327	0.858861	0.0563333	0.84163	-0.00980067	0.0172313	82.643	125.638	48	77	0.6	81	16410	84	58	81	49	0	1.8	3.7	1.3	2.3	NA	1	0.9	1.9	NA	NA	0	102	212	110	107.843
EE1DCD2DCD	YK877	77493_2	77662_1	M	LOW FAT	2021-08-26	4	9	NA	NA	NA	NA	NA	NA	NA	NA	0.0567708	0.855035	NA	NA	NA	NA	130	NA	NA	NA	NA	NA	NA	NA	NA	NA	NA	NA	NA	NA	NA	NA	NA	NA	NA	NA	0	121	NA	NA	NA
EE1DCD2DCE	YK811	76888_2	76752_1	M	HIGH FAT	2021-07-11	6	5	NA	NA	NA	NA	NA	NA	0.146715	0.796675	0.0638929	0.854891	0.0828218	-0.0582158	597.258	182.972	86	50	2.4	92	18652.5	82	93	70	50	0	1.9	10	8.6	7.8	4.8	1.3	1.3	2.6	1.5	1.8	0	155	410	255	164.516
EE1DCD2DCF	YK890	76912_2	76766_1	F	LOW FAT	2021-08-30	8	12	NA	NA	NA	NA	NA	NA	0.088534	0.832531	0.0517687	0.86	0.0367652	-0.0274691	276.938	113.368	81	90	NA	88	14977.5	121	57	145	53	0	1.7	6.4	2.5	5.9	2	0.8	0.8	1.6	0.8	1.1	0	112	215	103	91.9643
EE1DCD2DD0	YK828	77473_2	77493_1	F	HIGH FAT	2021-07-19	3	13	NA	NA	NA	NA	NA	NA	0.0809498	0.8319	0.0535249	0.857969	0.0274249	-0.0260697	223.336	107.297	43	49	0.466667	95	17707.5	51	45	78	62	0	1.5	6.1	2	4.8	NA	0.8	0.7	1.5	0.8	1.3	0	98	205	107	109.184
EE1DCD2DD1	YK894	77484_2	77452_1	F	LOW FAT	2021-09-07	5	13	NA	NA	NA	NA	NA	NA	0.0539668	0.864661	0.0537449	0.840782	0.000221962	0.0238787	173.966	180.588	97	100	NA	67	13020	74	62	74	27	0	1.8	5.9	2.5	3.1	1.9	0.7	0.7	1.4	0.7	1.1	0	94	231	137	145.745
EE1DCD2DD2	YK878	77493_2	77662_1	F	HIGH FAT	2021-08-26	4	9	NA	NA	NA	NA	NA	NA	0.0443286	0.868578	0.0564912	0.839825	-0.0121626	0.0287536	117.857	187.137	64	63	0.266667	81	13687.5	84	66	69	37	0	1.8	7.2	1	1.8	NA	1	1	2	NA	NA	0	93	212	119	127.957
EE1DCD2DD3	YK838	76885_2	76817_1	F	LOW FAT	2021-07-26	5	5	NA	NA	NA	NA	NA	NA	0.0986325	0.806724	0.0582051	0.835673	0.0404274	-0.0289494	281.278	117.206	81	102	0.25	84	12435	92	48	84	36	0	1.7	7.2	2.8	7	NA	0.8	0.8	1.6	NA	NA	0	116	232	116	100
EE1DCD2DD4	YK827	77473_2	77493_1	M	LOW FAT	2021-07-19	3	13	NA	NA	NA	NA	NA	NA	0.0917284	0.844074	0.0505556	0.871405	0.0411728	-0.0273312	476.341	207.684	66	63	0.6	89	16800	85	79	54	29	0	1.9	11.3	4.5	4.8	NA	1.2	1.4	2.6	1.1	1.3	0	121	333	212	175.207
EE1DCD2DD5	YK847	77456_2	77375_1	M	HIGH FAT	2021-07-31	3	12	NA	NA	NA	NA	NA	NA	0.11173	0.833856	0.0665459	0.863333	0.0451838	-0.0294775	350.163	158.961	80	64	1.3	105	17775	61	47	70	46	0	2	10.8	8	6.5	3.7	1.3	1.3	2.6	1.3	1.8	0	159	390	231	145.283
EE1DCD2DD6	YK899	77474_2	77370_1	M	HIGH FAT	2021-09-08	5	9	NA	NA	NA	NA	NA	NA	0.139465	0.795927	0.0680906	0.823689	0.0713746	-0.0277624	643.726	250.868	97	69	1.3	94	21697.5	80	92	50	31	0	2.1	11.9	11.5	9.3	3.6	1.1	1.2	2.3	1	1.6	0	121	388	267	220.661
EE1DCD2DD7	YK804	77426_2	77671_1	F	HIGH FAT	2021-07-05	2	8	NA	NA	NA	NA	NA	NA	0.0985041	0.805252	0.0417014	0.870556	0.0568027	-0.0653035	404.413	97.5231	65	60	NA	91	15907.5	71	52	67	50	0	1.8	5.6	3.1	6	2.1	0.7	0.7	1.4	0.8	1.2	0	110	212	102	92.7273
EE1DCD2DD8	YK869	77662_2	77455_1	M	HIGH FAT	2021-08-23	4	9	NA	NA	NA	NA	NA	NA	0.149942	0.780146	0.0573394	0.851284	0.0926021	-0.0711382	720.48	187.542	89	85	1.1	87	18255	61	81	63	34	0	2	10.7	11.1	7.6	NA	1.4	1.3	2.7	NA	NA	0	128	381	253	197.656
EE1DCD2DD9	YK809	76732_4	76848_1	M	LOW FAT	2021-07-07	6	10	NA	NA	NA	NA	NA	NA	0.0908939	0.848054	0.0696117	0.837896	0.0212822	0.0101576	353.835	251.786	114	94	0.9	92	15000	61	106	56	36	0	2	9	6.2	3.9	2.1	1.4	1.3	2.7	1	0.6	0	120	373	253	210.833
EE1DCD2DDA	YK858	77533_2	77660_1	F	LOW FAT	2021-08-08	3	8	NA	NA	NA	NA	NA	NA	0.0926977	0.841441	0.0496855	0.854119	0.0430122	-0.0126788	315.38	119.337	90	95	0.233333	76	11325	61	83	58	37	0	1.7	7.2	1.3	3.6	1.9	1	1	2	0.9	1.1	0	119	235	116	97.479
EE1DCD2DDB	YK813	77502_2	77404_1	M	HIGH FAT	2021-07-11	2	5	NA	NA	NA	NA	NA	NA	0.234766	0.718627	0.0667725	0.859788	0.167994	-0.141162	1152.89	197.843	116	107	1.3	96	18352.5	67	93	69	35	0	2	10.6	15.5	13.8	6	1.1	1.2	2.3	1.3	1.8	0	146	466	320	219.178
EE1DCD2DDC	YK836	77550_2	77484_1	F	LOW FAT	2021-07-26	3	11	NA	NA	NA	NA	NA	NA	0.0706881	0.850596	0.0441667	0.870769	0.0265214	-0.0201729	235.486	104.759	79	92	0.45	78	14085	76	67	54	26	0	1.8	6.4	1.8	4.6	NA	0.8	0.8	1.6	NA	NA	0	118	213	95	80.5085
EE1DCD2DDD	YK834	77446_2	77414_1	F	HIGH FAT	2021-07-20	3	12	NA	NA	NA	NA	NA	NA	0.149856	0.763955	0.0792884	0.836816	0.0705681	-0.0728611	343.836	114.385	54	55	0.2	83	17557.5	47	63	80	42	0	1.9	5.8	5.5	5.7	NA	0.9	0.9	1.8	0.7	1.2	0	98	217	119	121.429
EE1DCD2DDE	YK897	77661_2	77663_1	M	LOW FAT	2021-09-08	3	11	NA	NA	NA	NA	NA	NA	0.166185	0.773438	0.0599383	0.852901	0.106247	-0.0794629	878.115	219.91	114	91	1.6	97	22560	94	156	45	32	0	1.9	12.6	9.9	6.8	3.8	1.5	1.4	2.9	1.2	1.8	0	128	399	271	211.719
EE1DCD2DDF	YK896	77489_2	77371_1	F	HIGH FAT	2021-09-08	4	11	NA	NA	NA	NA	NA	NA	0.156901	0.765746	0.0641288	0.843371	0.0927718	-0.0776256	533.904	135.244	64	52	0.566667	84	19050	83	71	76	29	0	1.8	6.8	7.4	4.2	2.8	0.8	0.8	1.6	1.9	1	0	101	240	139	137.624
EE1DCD2DE1	YK883	76750_2	76791_1	M	LOW FAT	2021-08-29	7	6	NA	NA	NA	NA	NA	NA	0.147607	0.781635	0.0809722	0.825278	0.0666346	-0.0436432	373.962	146.25	111	73	1.9	99	12952.5	85	172	72	55	0	1.8	9.8	8	5.1	2.9	1	1	2	1.1	1.3	0	131	319	188	143.511
EE1DCD2DE2	YK855	77670_2	77667_1	M	HIGH FAT	2021-08-08	1	14	NA	NA	NA	NA	NA	NA	0.142023	0.798654	0.0398087	0.870683	0.102214	-0.0720287	1008.3	184.956	86	70	1.9	83	19215	74	71	64	50	0	1.8	9.7	11.1	12	4.7	1.2	1.2	2.4	1.1	1.6	0	145	395	250	172.414
EE1DCD2DE3	YK822	77381_2	77407_1	F	LOW FAT	2021-07-13	3	12	NA	NA	NA	NA	NA	NA	0.0736086	0.842768	0.0334375	0.867778	0.0401711	-0.0250102	399.896	120.539	69	70	0	76	14932.5	62	51	78	30	0	1.7	6.2	2.2	6	1.6	0.7	0.7	1.4	0.8	1.3	0	108	229	121	112.037
EE1DCD2DE5	YK817	77401_1	77446_1	M	LOW FAT	2021-07-12	2	10	NA	NA	NA	NA	NA	NA	0.138121	0.800762	0.051092	0.85908	0.0870287	-0.0583188	685.377	170.795	70	62	1	88	14002.5	77	91	62	35	0	2	7.7	9.6	4.7	3.8	1	1	2	0.9	0.8	0	134	336	202	150.746
EE1DCD2DE6	YK818	77401_1	77446_1	F	HIGH FAT	2021-07-12	2	10	NA	NA	NA	NA	NA	NA	0.0761315	0.837875	0.0657983	0.842577	0.0103332	-0.00470241	111.963	82.1709	53	59	0.233333	92	14752.5	56	50	71	54	0	1.9	5.3	2.7	5.7	1.9	0.8	0.7	1.5	0.7	0.9	0	134	226	92	68.6567
EE1DCD2DE7	YK861	77405_2	77534_1	M	LOW FAT	2021-08-08	1	13	NA	NA	NA	NA	NA	NA	0.0943225	0.844135	0.0426111	0.873028	0.0517113	-0.0288933	521.643	171.539	89	100	1.2	90	15975	65	89	65	38	0	2	10.3	6.4	4.3	2	1.1	1.1	2.2	1.2	1.4	0	141	361	220	156.028
EE1DCD2DE8	YK862	77370_2	77480_1	F	HIGH FAT	2021-08-08	1	13	NA	NA	NA	NA	NA	NA	0.0767884	0.848067	0.0661006	0.848585	0.0106878	-0.000517935	140.01	106.478	76	76	0.25	80	14775	58	76	64	37	0	1.9	7.2	2.5	4.7	1.8	0.8	0.7	1.5	0.8	1.2	0	119	234	115	96.6387
EE1DCD2DE9	YK807	77546_2	77380_1	M	LOW FAT	2021-07-06	2	10	NA	NA	NA	NA	NA	NA	0.0719436	0.850584	0.0484098	0.86893	0.0235338	-0.0183456	351.295	197.258	121	93	1.1	101	19785	78	90	58	45	0	2.1	8.6	4.7	5.9	3.2	1	1	2	1.1	1.5	0	131	340	209	159.542
EE1DCD2DEA	YK820	77643_1	77477_1	F	LOW FAT	2021-07-13	2	11	NA	NA	NA	NA	NA	NA	0.0895699	0.82361	0.0518213	0.851512	0.0377486	-0.0279022	286.671	116.381	61	65	NA	93	12682.5	101	60	84	40	0	1.8	6.3	3.1	7.4	2.4	0.8	0.8	1.6	1	1.1	0	111	227	116	104.505
EE1DCD2DEB	YK895	77489_2	77371_1	M	LOW FAT	2021-09-08	4	11	NA	NA	NA	NA	NA	NA	0.13727	0.800374	0.0746032	0.823016	0.0626669	-0.0226423	509.83	222.311	96	78	0.6	94	20782.5	71	94	61	24	0	2.2	9.6	8.6	4.3	3.1	1.1	1	2.1	1.2	1.6	0	126	362	236	187.302
EE1DCD2DEC	YK864	77451_2	77659_1	F	LOW FAT	2021-08-10	4	9	NA	NA	NA	NA	NA	NA	0.0595736	0.853372	0.038853	0.853441	0.0207206	-6.87672e-05	183.579	84.9313	66	61	0.2	86	15202.5	60	79	70	41	0	1.9	5.4	1.3	2.6	0.9	0.6	0.6	1.2	1	1	0	108	183	75	69.4444
EE1DCD2DED	YK833	77446_2	77414_1	M	LOW FAT	2021-07-20	3	12	NA	NA	NA	NA	NA	NA	0.115244	0.824302	0.0596078	0.860224	0.0556365	-0.0359222	520.63	207.603	100	112	1.6	87	14617.5	74	69	82	57	0	2.1	10.4	9.6	7.9	NA	1.2	1.1	2.3	1.1	1.8	0	141	394	253	179.433
EE1DCD2DEE	YK865	77659_2	77451_1	M	HIGH FAT	2021-08-10	3	3	NA	NA	NA	NA	NA	NA	0.142698	0.782786	0.0685185	0.84114	0.0741799	-0.0583539	647.609	234.071	96	92	1.1	97	17647.5	79	60	58	42	0	2.1	12.5	10.8	10.4	5.9	1.5	1.5	3	1.3	1.4	2	141	430	289	204.965
EE1DCD2DEF	YK825	77433_2	77429_1	M	HIGH FAT	2021-07-19	3	13	NA	NA	NA	NA	NA	NA	0.130265	0.811647	0.0323469	0.871803	0.0979178	-0.0601557	1297.16	222.999	70	62	3.4	112	22545	95	61	59	33	0	2	7.7	8.7	7.6	NA	1	1	2	1.3	1.1	0	117	357	240	205.128
EE1DCD2DF0	YK887	77453_2	77670_1	M	LOW FAT	2021-08-30	4	12	NA	NA	NA	NA	NA	NA	0.133779	0.870474	0.0778616	0.830126	0.0559171	0.0403484	276.05	129.506	76	56	1.2	76	13177.5	88	133	58	28	0	1.8	5.9	5.8	4.1	2.1	0.8	0.7	1.5	0.8	1	0	125	258	133	106.4
EE1DCD2DF1	YK856	77533_2	77660_1	F	LOW FAT	2021-08-08	1	14	NA	NA	NA	NA	NA	NA	0.0334517	0.875306	0.0488194	0.856007	-0.0153678	0.0192988	20.6259	80.0105	66	69	NA	76	13462.5	56	51	81	32	0	1.8	4.1	0.7	1.6	0.8	0.6	0.6	1.2	1.1	1.2	0	108	174	66	61.1111
EE1DCD2DF2	YK885	76776_2	76756_1	M	LOW FAT	2021-08-31	9	5	NA	NA	NA	NA	NA	NA	0.136591	0.79807	0.0755464	0.835765	0.0610449	-0.0376953	424.629	177.077	94	88	1.1	84	17850	80	80	64	35	0	2	10	10.3	8.1	4	1.1	1.2	2.3	1.2	1.2	0	142	365	223	157.042
EE1DCD2DF3	YK880	76728_5	76885_1	F	HIGH FAT	2021-08-28	6	9	NA	NA	NA	NA	NA	NA	0.0344974	0.883157	0.0506383	0.84117	-0.0161409	0.0419868	36.9748	111.1	52	53	0.533333	86	13987.5	61	37	58	41	0	1.8	5.4	1	1.8	0.7	0.8	0.7	1.5	0.8	1	0	101	184	83	82.1782
EE1DCD2DF4	YK826	77433_2	77429_1	F	LOW FAT	2021-07-19	3	13	NA	NA	NA	NA	NA	NA	0.0305446	0.882112	0.0500813	0.846667	-0.0195367	0.0354455	50.2435	156.655	68	88	0.4	96	16732.5	NA	NA	NA	NA	NA	1.8	5.8	0.5	1.4	NA	0.7	0.7	1.4	1	1.6	0	95	201	106	111.579
EE1DCD2DF5	YK888	77453_2	77670_1	F	HIGH FAT	2021-08-30	4	12	NA	NA	NA	NA	NA	NA	0.133694	0.793138	0.0578125	0.831111	0.0758812	-0.037973	434.775	120.684	77	78	0.133333	69	16192.5	86	91	79	60	0	1.8	7.2	4.9	7.1	NA	1	1	2	0.8	0.8	0	108	228	120	111.111
EE1DCD2DF6	YK874	77380_2	77382_1	F	HIGH FAT	2021-08-24	4	10	NA	NA	NA	NA	NA	NA	0.104754	0.817553	0.0715356	0.844831	0.0332183	-0.0272787	289.948	157.694	75	70	0.333333	88	18712.5	72	55	54	36	0	1.6	6.8	3.3	4.7	NA	1.1	0.9	2	NA	NA	0	106	242	136	128.302
EE1DCD2DF7	YK892	77428_2	77427_1	F	LOW FAT	2021-09-05	5	9	NA	NA	NA	NA	NA	NA	0.0864286	0.829778	0.0572619	0.856607	0.0291667	-0.0268294	183.004	81.6274	60	63	0.166667	83	16320	55	85	56	26	0	1.8	6.1	1.5	2	1.2	0.8	0.8	1.6	0.8	0.9	0	124	205	81	65.3226
EE1DCD2DF8	YK810	76732_4	76848_1	F	HIGH FAT	2021-07-07	6	10	NA	NA	NA	NA	NA	NA	0.183358	0.736392	0.0856272	0.821541	0.0977311	-0.0851492	514.776	157.34	86	86	1	106	19110	46	59	46	32	0	1.9	7.7	7.8	10.9	5.2	1.1	1	2.1	0.8	1.4	0	106	288	182	171.698
EE1DCD2DF9	YK859	77405_2	77534_1	M	LOW FAT	2021-08-08	1	5	NA	NA	NA	NA	NA	NA	0.0709275	0.866584	0.047451	0.864608	0.0234765	0.00197618	298.967	167.522	111	93	1.8	91	15510	107	111	43	27	0	1.9	12.2	5.2	4.4	2.8	1.3	1.2	2.5	1.4	1.4	1	156	378	222	142.308
EE1DCD2DFA	YK886	76776_2	76756_1	F	HIGH FAT	2021-08-31	9	5	NA	NA	NA	NA	NA	NA	0.0698018	0.853153	0.0663454	0.850361	0.00345642	0.00279171	134.504	123.623	57	48	0.4	100	19350	78	47	66	53	0	1.7	5.4	2	2.4	1.2	0.8	0.8	1.6	1.6	0.9	0	96	190	94	97.9167
EE1DCD2DFB	YK815	77671_2	77578_1	M	LOW FAT	2021-07-12	2	9	NA	NA	NA	NA	NA	NA	0.141096	0.793223	0.0865903	0.845623	0.0545054	-0.0524006	350.279	159.212	79	69	1.7	106	14107.5	93	124	59	32	0	2	8.6	9.2	8	4	1.3	1	2.3	1.3	1.2	0	149	362	213	142.953
EE1DCD2DFC	YK891	77428_2	77427_1	M	HIGH FAT	2021-09-05	5	9	NA	NA	NA	NA	NA	NA	0.116032	0.823323	0.0621944	0.859	0.0538378	-0.0356767	414.605	164.377	79	56	0.9	82	14295	78	91	65	44	0	2	8.5	8.4	6.3	3.5	1	1.1	2.1	1.1	1.3	0	140	338	198	141.429
EE1DCD2DFD	YK870	77662_2	77455_1	F	LOW FAT	2021-08-23	4	9	NA	NA	NA	NA	NA	NA	0.0830685	0.82634	0.0602222	0.842063	0.0228463	-0.0157239	181.128	100.004	73	69	NA	89	15907.5	99	62	90	43	0	1.7	6.2	1.8	4.3	NA	0.8	0.7	1.5	NA	NA	0	120	218	98	81.6667
EE1DCD2DFE	YK829	77475_2	77486_1	M	LOW FAT	2021-07-19	3	11	NA	NA	NA	NA	NA	NA	0.184418	0.755031	0.0636533	0.85032	0.120765	-0.0952886	882.74	201.189	129	112	0.966667	101	17985	152	233	78	52	0	2.1	15	15.4	10	NA	1.3	1.5	2.8	1.6	2.3	0	148	446	298	201.351
EE1DCD2DFF	YK866	77451_2	77659_1	F	LOW FAT	2021-08-10	3	3	NA	NA	NA	NA	NA	NA	0.0779343	0.820861	0.0494389	0.861485	0.0284953	-0.0406244	232.443	100.946	77	81	NA	69	15517.5	80	63	87	32	0	1.9	6.9	2.3	3.7	2	0.9	0.8	1.7	0.8	1.3	0	115	222	107	93.0435
EE1DCD2E00	YK841	77411_2	77502_1	M	LOW FAT	2021-07-27	3	12	NA	NA	NA	NA	NA	NA	0.115478	0.825843	0.0533968	0.871905	0.0620807	-0.0460621	633.234	221.136	114	113	3.4	86	18705	108	123	391	415	0	2	10.9	5.8	7.2	NA	1.3	1.1	2.4	NA	NA	0	131	370	239	182.443
EE1DCD2E01	YK845	77663_2	77376_3	M	HIGH FAT	2021-07-28	2	10	NA	NA	NA	NA	NA	NA	0.164392	0.780261	0.0561059	0.851682	0.108286	-0.0714216	1055.58	261.319	99	73	3.1	106	21142.5	103	107	62	46	0	2.1	10.3	12.5	11.9	NA	1.3	1.3	2.6	NA	NA	0	114	439	325	285.088
EE1DCD2E02	YK872	77450_2	77479_1	F	HIGH FAT	2021-08-23	4	7	NA	NA	NA	NA	NA	NA	0.0999723	0.830526	0.0885079	0.838095	0.0114644	-0.00756965	159.254	127.451	65	72	0.133333	81	17167.5	65	45	67	51	0	1.9	7	3.6	7.5	NA	0.9	0.9	1.8	NA	NA	0	123	263	140	113.821
EE1DCD2E03	YK844	77479_2	77473_1	F	LOW FAT	2021-07-28	3	6	NA	NA	NA	NA	NA	NA	0.110243	0.812159	0.0761333	0.844667	0.0341096	-0.0325074	257.662	137.494	88	88	1.6	84	15937.5	89	86	61	28	0	1.7	7.8	3.7	7.9	NA	0.8	0.8	1.6	NA	NA	0	112	260	148	132.143
EE1DCD2E04	YK849	77413_2	77425_1	M	HIGH FAT	2021-08-01	2	4	NA	NA	NA	NA	NA	NA	0.176344	0.762865	0.0679195	0.841096	0.108425	-0.0782314	656.258	164.183	73	65	2.4	96	23377.5	55	50	70	31	0	2.1	10.9	14	9.7	6.1	1.1	1.2	2.3	1.2	2.4	0	170	440	270	158.824
EE1DCD2E05	YK876	77419_2	77507_1	F	HIGH FAT	2021-08-26	4	8	NA	NA	NA	NA	NA	NA	0.0624123	0.858012	0.0416667	0.862449	0.0207456	-0.00443728	248.49	131.456	81	65	0.3	104	17287.5	74	56	73	45	0	1.9	6.9	1.9	3.6	NA	0.9	0.8	1.7	NA	NA	0	115	237	122	106.087
EE1DCD2E06	YK843	77479_2	77473_1	M	HIGH FAT	2021-07-28	3	6	NA	NA	NA	NA	NA	NA	0.102831	0.836715	0.053746	0.854127	0.0490849	-0.017412	528.647	221.873	76	61	1.2	105	17745	89	139	69	63	0	1.9	8.9	8.3	6.2	NA	1.2	1.2	2.4	NA	NA	0	108	368	260	240.741
EE1DCD2E07	YK852	77415_2	77550_1	F	HIGH FAT	2021-08-01	3	14	NA	NA	NA	NA	NA	NA	0.090367	0.83422	0.0550595	0.856726	0.0353074	-0.022506	219.459	89.5296	61	64	0.333333	97	15742.5	68	76	73	32	0	1.9	6	2.5	5	1.9	0.8	0.8	1.6	0.8	0.9	0	122	220	98	80.3279
EE1DCD2E08	YK860	77370_2	77480_1	F	HIGH FAT	2021-08-08	1	5	NA	NA	NA	NA	NA	NA	0.0599851	0.855665	0.0660556	0.842083	-0.0060705	0.0135818	68.7553	88.8306	63	55	0.433333	92	16207.5	75	53	67	53	0	1.7	6.9	1.7	3.5	1.5	0.8	0.8	1.6	0.8	1.4	0	131	227	96	73.2824
EE1DCD2E09	YK835	77550_2	77484_1	M	HIGH FAT	2021-07-26	3	11	NA	NA	NA	NA	NA	NA	0.095	0.843223	0.036164	0.86045	0.058836	-0.0172269	654.718	181.55	82	64	1.7	98	16012.5	NA	NA	NA	NA	NA	2	9.3	6	6.7	NA	1.3	1.2	2.5	NA	NA	0	145	373	228	157.241
EE1DCD2E0A	YK853	77449_2	77454_1	M	LOW FAT	2021-08-06	4	12	NA	NA	NA	NA	NA	NA	0.0770929	0.857579	0.0630421	0.853204	0.0140509	0.00437497	364.22	281.558	105	108	0.8	82	17970	90	81	46	34	0	2.1	14.1	7.3	4	2.6	1.7	1.3	3	1.4	1.9	0	127	419	292	229.921
EE1DCD2E0B	YK840	77382_2	77474_1	F	HIGH FAT	2021-07-26	3	13	NA	NA	NA	NA	NA	NA	0.0845016	0.823255	0.0369597	0.85956	0.0475419	-0.036305	437.661	125.232	59	63	0.466667	101	14145	66	72	70	51	0	1.8	6.5	3.1	5.2	NA	0.7	0.7	1.4	NA	NA	0	103	221	118	114.563
EE1DCD2E0C	YK882	76757_2	76794_1	F	LOW FAT	2021-08-28	8	7	NA	NA	NA	NA	NA	NA	0.0582963	0.849093	0.0849074	0.816111	-0.0266111	0.0329815	14.4311	73.4022	62	57	0.133333	86	15810	37	40	64	27	0	1.8	4.8	1.3	2.1	1	0.7	0.7	1.4	1	1.1	0	117	172	55	47.0085
EE1DCD2E0D	YK839	77382_2	77474_1	M	LOW FAT	2021-07-26	3	13	NA	NA	NA	NA	NA	NA	0.125	0.810145	0.0558951	0.861574	0.0691049	-0.0514287	612.314	199.506	82	73	2	95	17707.5	96	152	50	27	0	2	10.9	7.4	6.2	NA	1	1	2	NA	NA	0	130	357	227	174.615
EE1DCD2E0E	YK893	77484_2	77452_1	M	HIGH FAT	2021-09-07	5	13	NA	NA	NA	NA	NA	NA	0.0573896	0.881014	0.0492549	0.857686	0.00813466	0.0233278	355.096	301.212	91	84	0.5	90	15472.5	82	51	61	36	0	1.7	9.4	3.7	4.9	2.5	1.2	1.3	2.5	1.1	1.5	0	98	348	250	255.102
EE1DCD2E0F	YK854	77449_2	77454_1	F	HIGH FAT	2021-08-06	4	12	NA	NA	NA	NA	NA	NA	0.179012	0.749095	0.0680077	0.838429	0.111005	-0.0893345	635.211	149.55	74	68	1.03333	107	19635	102	94	44	21	0	1.7	8.1	7	12.3	3.9	1	0.9	1.9	0.9	1.2	0	101	256	155	153.465
EE1DCD2E11	YK824	77478_2	77546_1	F	LOW FAT	2021-07-19	3	13	NA	NA	NA	NA	NA	NA	0.0409783	0.867899	0.0773651	0.833333	-0.0363868	0.0345652	-7.18096	82.5067	82	73	0.3	95	15900	56	43	73	33	0	1.8	4.8	1.2	2.8	NA	0.7	0.8	1.5	1.7	1	0	114	192	78	68.4211
EE1DCD2E12	YK884	76750_2	76791_1	F	HIGH FAT	2021-08-29	7	6	NA	NA	NA	NA	NA	NA	0.110498	0.802011	0.0786598	0.802577	0.0318383	-0.000565825	151.988	79.255	42	45	0.266667	100	14167.5	62	42	69	53	0	1.6	5.1	2.5	4.5	1.4	0.7	0.7	1.4	0.7	1	0	106	179	73	68.8679
EE1DCD2E13	YK879	76728_5	76885_1	M	LOW FAT	2021-08-28	6	9	NA	NA	NA	NA	NA	NA	0.120141	0.815552	0.0639286	0.856815	0.056212	-0.0412633	457.076	182.153	88	86	2.5	114	14932.5	70	142	84	57	0	2.1	9.8	10.6	6.6	4.2	1.2	1.1	2.3	1.2	1.6	0	127	346	219	172.441
EE1DCD2E14	YK867	77534_2	77666_1	M	HIGH FAT	2021-08-22	3	12	NA	NA	NA	NA	NA	NA	0.133648	0.809435	0.0471947	0.866403	0.0864535	-0.0569672	760.769	183.975	87	56	1.1	81	16057.5	86	77	53	52	0	1.9	7.6	8.9	6.3	NA	1	0.9	1.9	NA	NA	2	116	313	197	169.828
EE1DCD2E15	YK837	76885_2	76817_1	M	HIGH FAT	2021-07-26	5	5	NA	NA	NA	NA	NA	NA	0.153741	0.780054	0.0535942	0.84029	0.100147	-0.0602355	817.956	197.061	83	61	1.7	106	14092.5	96	74	67	54	0	2	10.1	11.8	11.8	NA	1.2	1.2	2.4	NA	NA	0	130	384	254	195.385
EE1DCD2E16	YK857	77670_2	77667_1	M	HIGH FAT	2021-08-08	3	8	NA	NA	NA	NA	NA	NA	0.154614	0.794985	0.0647287	0.850233	0.089885	-0.0552477	714.731	218.922	97	96	1.4	100	21555	75	115	59	37	0	2	13	16.6	13.5	6.9	1.5	1.5	3	1.3	2	0	148	460	312	210.811
EE1DCD2E17	YK898	77661_2	77663_1	F	HIGH FAT	2021-09-08	3	11	NA	NA	NA	NA	NA	NA	0.146933	0.78008	0.038172	0.85362	0.108761	-0.0735401	934.742	145.658	84	77	0.2	85	19365	67	59	68	48	0	2.7	7.5	4.2	8.6	4	0.9	0.9	1.8	0.9	1.2	0	108	251	143	132.407
EE1DCD2E18	YK842	77411_2	77502_1	F	HIGH FAT	2021-07-27	3	12	NA	NA	NA	NA	NA	NA	0.100033	0.797635	0.0648689	0.839476	0.0351639	-0.0418402	251.732	116.722	63	54	0.4	109	14827.5	73	42	60	44	0	1.7	5.9	1.6	4	NA	0.8	0.8	1.6	NA	NA	0	103	206	103	100
EE1DCD2E19	YK848	77456_2	77375_1	F	HIGH FAT	2021-07-31	3	12	NA	NA	NA	NA	NA	NA	0.185369	0.742527	0.0655455	0.837636	0.119823	-0.095109	527.323	96.6319	53	41	0.666667	97	16305	85	59	61	42	0	2.2	6.1	4.5	8.4	2.6	1.2	1.1	2.3	1.2	1.3	0	127	241	114	89.7638
EE1DCD2E1A	YK814	77502_2	77404_1	F	LOW FAT	2021-07-11	2	5	NA	NA	NA	NA	NA	NA	0.140676	0.791079	0.0662308	0.847949	0.0744454	-0.0568692	359.117	101.657	92	100	0.7	85	16627.5	88	83	46	20	0	1.9	8.6	6.4	6.7	3.6	1	1	2	1.1	0.8	0	146	298	152	104.11
EE1DCD2E1B	YK875	77419_2	77507_1	M	LOW FAT	2021-08-26	4	8	NA	NA	NA	NA	NA	NA	0.0858895	0.852418	0.0513456	0.863823	0.0345439	-0.0114047	492.376	249.453	131	106	0.2	100	16815	70	89	66	35	0	2	12	5.4	5.6	NA	1.3	1.3	2.6	NA	NA	0	130	400	270	207.692
EE1DCD2E1C	YK816	77671_2	77578_1	F	HIGH FAT	2021-07-12	2	9	NA	NA	NA	NA	NA	NA	0.122018	0.801003	0.0736267	0.836533	0.0483909	-0.0355308	252.662	103.762	67	48	0.137	73	14437.5	99	56	91	55	0	1.9	6.6	3.6	7.4	2.4	0.9	0.9	1.8	1	1.2	0	138	265	127	92.029
EE1DCD2E1D	YK881	76757_2	76794_1	M	HIGH FAT	2021-08-28	8	7	NA	NA	NA	NA	NA	NA	0.152055	0.780699	0.0612802	0.837126	0.0907744	-0.0564265	603.035	164.235	100	61	1.1	98	18150	64	66	62	44	0	2	10.2	13.2	10.7	5.4	1.4	1.2	2.6	1.2	1.5	0	160	393	233	145.625
EE1DCD2E1E	YK889	76912_2	76766_1	M	HIGH FAT	2021-08-30	8	12	NA	NA	NA	NA	NA	NA	0.198079	0.750086	0.0641803	0.856585	0.133899	-0.106499	1076.33	233.76	99	95	2.3	97	17827.5	97	152	64	47	0	1.9	14.1	21.7	18.6	7.6	1.4	1.3	2.7	1.3	1.9	0	148	496	348	235.135
EE1DCD2E1F	YK832	76812_2	76755_1	F	HIGH FAT	2021-07-20	7	8	NA	NA	NA	NA	NA	NA	0.0821815	0.833019	0.0893667	0.822033	-0.00718517	0.0109859	75.6434	93.5526	63	49	0.4	90	18450	NA	NA	NA	NA	NA	1.8	6.5	1.9	4.3	NA	0.8	0.7	1.5	0.9	1.3	0	110	203	93	84.5455
EE1DCD2E20	YK831	76812_2	76755_1	M	LOW FAT	2021-07-20	7	8	NA	NA	NA	NA	NA	NA	0.112935	0.817883	0.0716835	0.849461	0.0412515	-0.0315787	406.059	209.271	95	83	0.8	85	15472.5	54	58	51	27	0	1.7	9.6	8	5.8	NA	1.2	1.1	2.3	1.2	1.5	0	117	323	206	176.068
EE1DCD2E21	YK868	77534_2	77666_1	F	LOW FAT	2021-08-22	3	12	NA	NA	NA	NA	NA	NA	0.0576239	0.843607	0.0586333	0.851533	-0.0010094	-0.0079265	91.643	93.1848	72	64	0.8	81	13305	74	85	57	27	0	2.2	5.3	1.3	3.5	NA	0.8	0.7	1.5	NA	NA	0	111	196	85	76.5766
EE1DCD2E23	YK871	77450_2	77479_1	M	LOW FAT	2021-08-23	4	7	NA	NA	NA	NA	NA	NA	0.139941	0.796565	0.0692464	0.851014	0.0706943	-0.0544496	590.624	219.874	125	99	2.4	98	18690	132	127	57	30	0	2	12.8	7.2	9.6	NA	1.3	1.3	2.6	NA	NA	0	136	407	271	199.265
EE1DCD2E24	YK830	77475_2	77486_1	F	HIGH FAT	2021-07-19	3	11	NA	NA	NA	NA	NA	NA	0.188562	0.739129	0.0709295	0.840641	0.117632	-0.101512	516.042	103.748	59	56	0.2	84	16222.5	67	56	77	46	0	1.75	6.8	6.2	6.3	NA	0.9	0.9	1.8	0.7	1.4	0	117	247	130	111.111
EE1DCD2E25	YK873	77380_2	77382_1	M	LOW FAT	2021-08-24	4	10	NA	NA	NA	NA	NA	NA	0.0579882	0.875779	0.0368889	0.876762	0.0210993	-0.000982812	406.024	221.544	104	88	0.4	73	14490	74	58	67	35	0	2	9.1	3.3	3.7	NA	1.7	NA	NA	NA	NA	0	125	354	229	183.2
EE1DCD2E26	YK808	77546_2	77380_1	F	HIGH FAT	2021-07-06	2	10	NA	NA	NA	NA	NA	NA	0.0234655	0.895184	0.0471986	0.850922	-0.0237331	0.0442616	20.0601	154.051	88	66	0.3	95	16342.5	57	60	71	34	0	2	6.2	1	1.9	0.9	0.8	0.8	1.6	0.9	1.2	0	104	222	118	113.462
EE1DCD2E27	YK863	77659_2	77451_1	M	HIGH FAT	2021-08-10	4	9	NA	NA	NA	NA	NA	NA	0.182542	0.762635	0.07475	0.842472	0.107792	-0.0798375	705.871	198.727	88	65	2	108	17790	94	110	54	49	0	2	10.4	15	13.1	4.9	1.1	1.1	2.2	1.3	1.7	0	140	400	260	185.714
EE1DCD2E29	YK821	77381_2	77407_1	M	HIGH FAT	2021-07-13	3	12	NA	NA	NA	NA	NA	NA	0.111646	0.825899	0.0402804	0.860218	0.0713652	-0.0343193	923.202	254.431	81	70	1.2	89	17760	82	66	75	48	0	1.9	9.4	10.3	9	4.2	1.2	1.1	2.3	1.1	1.6	0	124	414	290	233.871
EE1DCD2E2A	YK851	77415_2	77550_1	M	LOW FAT	2021-08-01	3	14	NA	NA	NA	NA	NA	NA	0.0856571	0.853762	0.0498677	0.873519	0.0357894	-0.0197566	377.135	171.495	86	90	0.6	86	19327.5	28	34	41	17	NA	1.6	9.6	5	4.6	3	1.4	1.3	2.7	1.3	1.2	0	148	356	208	140.541
EE1DCD2E2B	YK850	77413_2	77425_1	F	HIGH FAT	2021-08-01	2	4	NA	NA	NA	NA	NA	NA	0.117007	0.818776	0.105074	0.815339	0.0119331	0.00343628	141.437	117.728	60	64	0.566667	91	18705	78	68	84	54	0	1.8	5.8	3.8	3.6	1.8	0.8	0.9	1.7	0.8	0.9	0	128	241	113	88.2812
EE1DCD2E2C	YK914	77427_2	77471_1	F	HIGH FAT	2021-09-14	5	11	NA	NA	NA	NA	NA	NA	0.106971	0.812344	0.0468889	0.846185	0.0600822	-0.0338412	455.134	133.602	60	50	0.2	101	18517.5	52	34	56	35	0	1.7	5.4	1.5	3.6	1.5	0.8	0.8	1.6	0.8	0.9	0	104	216	112	107.692
EE1DCD2E2D	YK987	78037_2	78061_1	M	HIGH FAT	2021-11-08	3	10	33481	14926	18555	4417	4536	-119	0.138254	0.806453	0.0639875	0.856542	0.0742669	-0.0500889	624.927	215.894	69	64	1.3	91	20325	89	104	62	51	0	1.7	9	7	8	2.8	1	1	2	1.2	1.4	0	128	361	233	182.031
EE1DCD2E2E	YK939	77669_2	77419_1	M	HIGH FAT	2021-10-09	3	5	43634	14024	29610	5947	5809	138	0.127196	0.808046	0.0702347	0.849789	0.0569616	-0.0417431	365.508	144.416	76	63	0.9	102	20415	107	78	46	46	0	1.7	13.2	10.2	7.5	3	1.3	1.4	2.7	1.4	1.9	1	163	408	245	150.307
EE1DCD2E2F	YK918	78048_2	78148_1	F	LOW FAT	2021-09-25	1	8	96329	42275	54054	9095	18971.7	-9876.67	0.0355	0.868182	0.0806383	0.84	-0.0451383	0.0281818	3.0343	141.895	92	91	0.2	74	16515	67	62	62	27	0	1.9	5.9	1.4	2.7	1.3	0.9	0.9	1.8	1.1	1.2	0	114	244	130	114.035
EE1DCD2E30	YK946	77429_2	77453_1	F	HIGH FAT	2021-10-10	1	12	65084	29420	35664	8598.5	8459	139.5	0.100025	0.82767	0.0569912	0.868083	0.0430336	-0.0404122	317.805	126.971	99	79	0.533333	85	16447.5	58	47	70	40	0	2	7.1	2.9	7.1	2.4	0.9	0.9	1.8	1.1	1.7	0	128	290	162	126.562
EE1DCD2E31	YK926	77482_2	77434_1	F	LOW FAT	2021-09-28	5	14	65139	23098	42041	9054.5	8825.33	229.167	0.0838796	0.817339	0.0597015	0.835373	0.0241781	-0.0180342	399.083	247.555	81	84	0.233333	79	17295	72	72	72	33	0	1.9	7.1	2.7	4.9	1.7	NA	1.6	NA	0.9	1.4	0	91	272	181	198.901
EE1DCD2E32	YK932	77448_2	77402_1	F	HIGH FAT	2021-10-02	6	11	NA	NA	NA	NA	NA	NA	0.155986	0.772122	0.0660078	0.843876	0.0899786	-0.0717535	573.224	160.66	75	64	NA	76	18120	86	57	69	32	0	1.9	7.7	4.9	10.7	1.9	1	1	2	0.9	1.5	0	104	263	159	152.885
EE1DCD2E33	YK933	78157_2	78125_1	M	LOW FAT	2021-10-03	1	8	NA	NA	NA	NA	NA	NA	0.137871	0.67588	0.077354	0.837251	0.0605175	-0.161371	662.55	245.374	158	117	1.6	108	16845	93	73	52	26	0	2	15	8.5	8.3	5.2	1.4	1.5	2.9	1.2	1.6	0	120	447	327	272.5
EE1DCD2E34	YK919	78123_2	78077_1	M	LOW FAT	2021-09-25	1	8	36617	12509	24108	5088.5	4861.67	226.833	0.0727419	0.553701	0.07875	0.826326	-0.00600806	-0.272625	290.476	183.259	123	109	1.1	88	17947.5	64	77	52	32	0	1.9	10.3	5.1	6.8	3.8	1.2	1.2	2.4	1.2	1.5	0	106	397	291	274.528
EE1DCD2E35	YK973	78114_2	78171_1	M	HIGH FAT	2021-10-26	2	10	40672	12562	28110	6088.5	4447.33	1641.17	0.131815	0.809596	0.0554321	0.856852	0.0763828	-0.0472562	716.871	224.573	84	56	2	88	15735	74	100	54	43	0	2.1	8.8	9.1	7.2	4	1.1	1.1	2.2	1.2	1.2	0	131	393	262	200
EE1DCD2E36	YK989	78105_2	78152_1	M	HIGH FAT	2021-11-08	3	13	45497	17123	28374	6769	5846.67	922.333	0.137414	0.805609	0.058179	0.853611	0.0792349	-0.0480024	768.223	246.921	88	92	1.4	84	15495	87	78	65	41	0	1.9	11.7	7	9.8	4.7	1.2	1.2	2.4	1.3	1.7	2	129	409	280	217.054
EE1DCD2E37	YK997	78119_2	78153_1	M	HIGH FAT	2021-11-10	3	12	42151	16407	25744	6833.5	4829	2004.5	0.10501	0.830578	0.0462271	0.85641	0.0587825	-0.0258322	763.708	268.751	115	104	1.6	93	17400	111	99	173	160	0	2	10.2	9.8	10	4.1	1.3	1.2	2.5	1.3	1.7	0	110	389	279	253.636
EE1DCD2E38	YK975	78107_2	78267_1	M	HIGH FAT	2021-10-31	2	10	NA	NA	NA	NA	NA	NA	0.145846	0.801239	0.050029	0.856812	0.0958172	-0.0555723	888.644	217.135	89	92	2.6	95	18367.5	99	115	51	39	0	2	11.1	11.3	7.8	5.9	1.3	1.3	2.6	1.2	1.9	2	132	405	273	206.818
EE1DCD2E39	YK931	77448_2	77402_1	M	LOW FAT	2021-10-02	6	11	NA	NA	NA	NA	NA	NA	0.152868	0.842616	0.0781273	0.853558	0.0747404	-0.0109417	687.057	297.091	109	85	2.1	106	21450	97	112	67	42	0	2.1	11.9	13.9	8	5	1.2	1.2	2.4	1.2	1.4	1	110	375	265	240.909
EE1DCD2E3A	YK928	78079_2	78182_3	F	LOW FAT	2021-10-02	1	10	NA	NA	NA	NA	NA	NA	0.0363623	0.713826	0.0680193	0.849517	-0.031657	-0.135691	78.196	180.091	67	57	0.1	101	14940	NA	NA	NA	NA	NA	1.8	4.7	1.5	2.5	1.1	0.8	0.8	1.6	1.3	0.9	0	83	193	110	132.53
EE1DCD2E3B	YK986	78115_2	78224_1	F	HIGH FAT	2021-11-03	2	12	NA	NA	NA	NA	NA	NA	0.0736501	0.841493	0.0454264	0.851124	0.0282237	-0.00963082	316.638	154.069	65	54	0.2	85	18285	71	41	63	42	0	1.7	6.4	2.6	5	1.3	0.8	0.8	1.6	0.9	1	0	100	228	128	128
EE1DCD2E3C	YK947	77664_2	78243_1	M	HIGH FAT	2021-10-11	1	11	76479	37741	38738	5356	14296	-8940	0.117699	0.820667	0.0411236	0.869213	0.0765753	-0.0485468	896.903	228.861	78	67	0.9	82	14535	80	92	68	58	0	2	7.8	7.1	5.5	2.7	0.9	0.9	1.8	1	1.3	0	106	338	232	218.868
EE1DCD2E3D	YK993	78106_2	78126_1	M	LOW FAT	2021-11-10	3	7	36462	11673	24789	5460	4685.67	774.333	0.0848337	0.856504	0.0578531	0.869548	0.0269806	-0.0130436	410.742	243.08	111	111	1.6	89	16807.5	69	127	62	37	0	2.3	12.4	9	6.9	2.4	1.3	1.4	2.7	1.3	1.1	0	140	448	308	220
EE1DCD2E3E	YK988	78037_2	78061_1	F	LOW FAT	2021-11-08	3	10	48783	23802	24981	7576	5969.67	1606.33	0.0625118	0.83703	0.0519858	0.861702	0.010526	-0.0246721	169.918	118.041	66	72	0.333333	71	16792.5	67	63	68	26	0	1.7	6	1.6	3.9	1.3	0.7	0.7	1.4	0.8	1.1	0	107	229	122	114.019
EE1DCD2E3F	YK923	78032_2	78088_1	M	HIGH FAT	2021-09-25	1	5	36533	13778	22755	5009.5	5041.33	-31.8333	0.269746	0.680977	0.0657895	0.847368	0.203957	-0.166392	1829.23	278.133	101	75	3.2	116	23227.5	114	107	81	77	0	2	11.6	20.2	13.6	11.2	1.3	1.2	2.5	1.4	1.7	3	118	479	361	305.932
EE1DCD2E40	YK940	78049_2	77419_1	F	LOW FAT	2021-10-09	3	5	47462	17346	30116	6521.5	5837.33	684.167	0.132114	0.794241	0.087352	0.839595	0.0447618	-0.0453538	247.718	117.487	94	81	1.7	102	23730	119	157	56	34	0	1.8	7.3	3.8	8.1	0.9	0.8	0.9	1.7	0.9	1	0	118	256	138	116.949
EE1DCD2E41	YK909	77487_2	77485_1	M	LOW FAT	2021-09-13	5	13	NA	NA	NA	NA	NA	NA	0.0792105	0.820283	0.0404984	0.868754	0.0387121	-0.0484712	525.154	201.793	91	86	1.1	91	16117.5	69	121	50	27	0	2.1	11.1	5.8	4.7	2.9	1.3	1.2	2.5	1.1	1	0	122	348	226	185.246
EE1DCD2E42	YK982	78422_2	78268_1	F	HIGH FAT	2021-11-03	1	10	NA	NA	NA	NA	NA	NA	0.0523656	0.866636	0.0341667	0.863371	0.0181989	0.00326473	277.938	147.523	59	60	NA	82	14017.5	79	58	98	43	0	1.9	6	1.8	3.9	1.1	0.9	0.9	1.8	1	1.1	0	103	226	123	119.417
EE1DCD2E43	YK994	78070_2	78087_1	F	HIGH FAT	2021-11-09	2	12	NA	NA	NA	NA	NA	NA	0.079	0.846667	0.0589308	0.868333	0.0200692	-0.0216667	190.875	111.567	63	62	0.2	83	15592.5	50	58	69	29	0	1.9	5.5	2	3.7	1.5	0.9	0.9	1.8	0.8	1.3	0	118	253	135	114.407
EE1DCD2E44	YK944	77429_2	77432_1	F	HIGH FAT	2021-10-10	5	7	63502	25804	37698	8041	9308.67	-1267.67	0.0872448	0.836581	0.0403801	0.876842	0.0468647	-0.0402615	413.613	126.804	75	75	0.2	109	19965	64	53	77	51	0	1.9	8.8	2.7	4.1	3.1	1.1	1.1	2.2	1.1	1	1	132	296	164	124.242
EE1DCD2E45	YK969	78181_2	78122_1	M	LOW FAT	2021-10-24	2	9	45482	15929	29553	5861.5	6434.67	-573.167	0.0781818	0.847586	0.0554135	0.853584	0.0227683	-0.00599775	238.399	138.164	104	108	1.4	84	15967.5	67	84	47	22	0	2.1	11.1	5.6	6.3	3.4	1.3	1.3	2.6	1.2	1.3	0	153	386	233	152.288
EE1DCD2E46	YK910	77487_2	77485_1	F	HIGH FAT	2021-09-13	5	13	NA	NA	NA	NA	NA	NA	0.0802101	0.830056	0.046	0.858733	0.0342101	-0.0286773	315	130.052	95	157	0.2	98	16800	56	42	69	42	0	1.8	7.2	4.7	6.6	2.4	0.9	0.8	1.7	0.9	1.8	0	115	254	139	120.87
EE1DCD2E47	YK981	78422_2	78268_1	M	LOW FAT	2021-11-03	1	10	NA	NA	NA	NA	NA	NA	0.0550789	0.866785	0.0359574	0.874645	0.0191214	-0.00786038	450.789	256.343	86	83	NA	83	14047.5	66	57	86	48	0	2.1	8.5	4.1	4.2	2.9	1.2	1.2	2.4	1.1	1.8	0	117	337	220	188.034
EE1DCD2E48	YK991	78416_2	78114_1	M	LOW FAT	2021-11-09	1	11	42064	13877	28187	6371	4887	1484	0.113652	0.825407	0.070028	0.852185	0.0436244	-0.0267777	441.44	223.131	73	67	1.7	85	14077.5	79	157	48	25	0	2	13	10	8.2	4.9	1.2	1.2	2.4	1.2	2	1	141	421	280	198.582
EE1DCD2E49	YK964	78204_2	78172_1	F	LOW FAT	2021-10-23	2	11	68640	30652	37988	10358.5	8628.33	1730.17	0.0860802	0.83341	0.0491892	0.847267	0.0368911	-0.0138568	240.537	91.4121	83	75	0.533333	88	14962.5	54	63	59	39	0	1.9	7.2	2.8	5.3	2.1	0.9	0.9	1.8	1	1.4	0	128	241	113	88.2812
EE1DCD2E4A	YK936	78266_1	78121_1	F	HIGH FAT	2021-10-03	1	7	NA	NA	NA	NA	NA	NA	0.110573	0.816003	0.0729218	0.838107	0.0376513	-0.022104	313.713	165.644	66	58	0.2	83	14752.5	88	53	70	40	0	2	6.5	3.6	7.6	3.1	0.8	0.8	1.6	1.1	1	0	100	237	137	137
EE1DCD2E4B	YK937	78170_2	78037_1	M	LOW FAT	2021-10-05	1	11	NA	NA	NA	NA	NA	NA	0.107793	0.83496	0.0715897	0.836051	0.0362029	-0.0010915	764.04	473.097	134	105	1	83	16275	94	85	63	24	0	2	12.5	9.8	6.8	4	1.2	1.3	2.5	1.1	1.8	0	84	388	304	361.905
EE1DCD2E4C	YK995	78111_2	78032_1	M	HIGH FAT	2021-11-09	2	8	36980	14066	22914	5435.5	4409.67	1025.83	0.145473	0.804242	0.0730208	0.8575	0.0724521	-0.0532583	591.049	225.331	116	109	1.7	108	19222.5	160	164	63	34	0	2	14.8	17.6	13.2	6.8	1.6	1.7	3.3	1.7	1.7	2	156	492	336	215.385
EE1DCD2E4D	YK930	78276_2	78043_1	F	LOW FAT	2021-10-02	1	13	NA	NA	NA	NA	NA	NA	0.0746384	1.0461	0.0551029	0.859053	0.0195356	0.187049	216.057	184.139	107	95	0.2	81	14910	81	58	65	28	0	1.3	6.5	2.4	5.1	2.3	0.9	0.9	1.8	0.8	1.4	0	101	247	146	144.554
EE1DCD2E4E	YK903	77471_2	77482_1	M	HIGH FAT	2021-09-11	5	12	NA	NA	NA	NA	NA	NA	0.124317	0.824367	0.0403118	0.872686	0.084005	-0.0483185	922.784	213.292	87	78	NA	80	16020	70	68	68	29	0	2.2	11	15.4	9.3	6.5	NA	2.4	NA	1.3	1.5	0	161	474	313	194.41
EE1DCD2E4F	YK956	78086_2	78118_1	F	HIGH FAT	2021-10-16	2	6	NA	NA	NA	NA	NA	NA	NA	NA	NA	NA	NA	NA	NA	NA	NA	NA	NA	NA	NA	NA	NA	NA	NA	NA	NA	NA	NA	NA	NA	NA	NA	NA	NA	NA	0	NA	NA	NA	NA
EE1DCD2E50	YK942	78049_2	77433_1	F	LOW FAT	2021-10-09	6	7	64961	26161	38800	7888	8907.67	-1019.67	0.0835865	0.839916	0.0530791	0.874153	0.0305074	-0.0342369	216.285	92.9811	68	69	0.933333	90	16920	64	106	65	49	0	1.8	6.7	2.9	4.5	2	0.9	0.8	1.7	1	1.6	0	127	251	124	97.6378
EE1DCD2E51	YK943	78043_2	77432_1	M	LOW FAT	2021-10-10	5	7	46324	17903	28421	5766.5	5918.67	-152.167	0.146862	0.795017	0.0588978	0.859113	0.0879644	-0.0640959	688.27	192.544	109	83	0.9	91	18060	83	118	72	26	0	2.2	13.6	10.2	8.1	4.8	1.5	1.3	2.8	1.4	1.4	0	144	407	263	182.639
EE1DCD2E52	YK905	77376_4	77447_1	M	HIGH FAT	2021-09-12	2	13	NA	NA	NA	NA	NA	NA	0.116152	0.822406	0.0289259	0.872037	0.0872265	-0.0496312	1519.59	280.378	88	76	1	94	17490	59	48	57	28	0	2.1	10.1	6.5	9.3	3.5	1.3	1.3	2.6	1.1	1.3	0	108	374	266	246.296
EE1DCD2E53	YK967	78038_2	78115_1	M	LOW FAT	2021-10-23	2	7	39555	15544	24011	5221	5073	148	0.124922	0.802157	0.0635049	0.861985	0.0614167	-0.0598284	391.779	132.648	107	86	1.5	86	16410	89	111	63	37	0	2	9.3	6.7	6.1	3.5	1	1	2	1.2	1.9	0	157	352	195	124.204
EE1DCD2E54	YK968	78038_2	78115_1	F	HIGH FAT	2021-10-23	2	7	70701	31151	39550	7590.5	9939.33	-2348.83	0.0835765	0.853548	0.0363144	0.882466	0.0472622	-0.0289182	335.97	83.2233	66	61	0.233333	89	15015	71	52	67	51	0	2	7.4	3.1	5	2.1	NA	1.4	NA	0.9	1.2	0	135	262	127	94.0741
EE1DCD2E55	YK974	78114_2	78171_1	F	LOW FAT	2021-10-26	2	10	62541	24987	37554	9136	8325.33	810.667	0.074237	0.843881	0.0753722	0.835113	-0.00113513	0.00876821	115.157	120.74	88	81	0.233333	79	17572.5	79	70	74	44	0	1.9	8.3	2.2	3.7	1.8	0.9	0.9	1.8	1	1.3	0	120	253	133	110.833
EE1DCD2E56	YK953	78122_2	78104_1	M	HIGH FAT	2021-10-16	2	7	NA	NA	NA	NA	NA	NA	0.118814	0.82274	0.0604987	0.850525	0.0583149	-0.0277848	447.419	169.634	83	70	1.5	89	15390	64	78	70	68	0	2	10.3	10.3	10.1	4	1.1	1.1	2.2	1.1	1.6	0	143	379	236	165.035
EE1DCD2E57	YK922	78031_2	78072_1	F	HIGH FAT	2021-09-25	1	11	53143	23431	29712	6595	7322	-727	0.107823	0.807869	0.0606838	0.854573	0.0471397	-0.0467035	398.873	165.425	73	69	0.7	94	16395	70	52	45	21	0	1.8	6.1	3.5	3.2	1.6	0.8	0.8	1.6	0.9	1.1	0	95	234	139	146.316
EE1DCD2E58	YK960	77447_2	78376_1	F	HIGH FAT	2021-10-16	1	11	NA	NA	NA	NA	NA	NA	0.107544	0.821107	0.0420354	0.865605	0.0655085	-0.0444981	459.228	107.347	65	51	0.7	99	16140	53	52	80	66	0	1.9	6.5	3.5	7.8	7.3	0.8	0.8	1.6	0.9	1.5	0	124	248	124	100
EE1DCD2E59	YK907	77504_2	77428_1	M	LOW FAT	2021-09-13	5	3	NA	NA	NA	NA	NA	NA	0.0956718	0.841259	0.060271	0.841518	0.0354008	-0.000259112	405.89	218.601	109	95	1.3	81	16410	73	130	51	22	0	2	11	6.9	6.2	3.3	1.3	1.4	2.7	1.2	1.7	0	137	403	266	194.161
EE1DCD2E5A	YK906	77376_4	77447_1	F	LOW FAT	2021-09-12	2	13	NA	NA	NA	NA	NA	NA	0.0340264	0.876419	0.0394007	0.86633	-0.00537435	0.0100896	96.0076	129.61	88	91	0.133333	72	16657.5	72	53	70	27	0	1.8	6.5	1.9	1.8	0.8	0.9	0.8	1.7	0.7	0.6	0	107	209	102	95.3271
EE1DCD2E5B	YK920	78123_2	78077_1	F	HIGH FAT	2021-09-25	1	8	65627	30038	35589	7302.5	9520.67	-2218.17	0.0763063	0.854099	0.0878241	0.818333	-0.0115178	0.0357658	167.897	221.809	64	58	0.366667	76	17917.5	46	75	74	59	0	1.8	5.6	1.6	3.9	1.9	0.8	0.8	1.6	0.8	1.2	0	84	239	155	184.524
EE1DCD2E5C	YK957	78051_2	78080_1	M	LOW FAT	2021-10-16	2	6	NA	NA	NA	NA	NA	NA	0.101156	0.840503	0.0364319	0.866197	0.0647239	-0.0256947	678.222	171.967	110	71	1.3	88	18232.5	85	138	60	27	0	2.1	14.5	6.8	5.9	3.2	1.4	1.5	2.9	1.2	1.2	0	166	422	256	154.217
EE1DCD2E5D	YK917	78048_2	78148_1	M	HIGH FAT	2021-09-25	1	8	NA	NA	NA	NA	NA	NA	0.122847	0.81875	0.0566316	0.849579	0.0662156	-0.0308289	776.828	289.543	100	77	0.3	92	21367.5	82	76	62	35	0	1.8	9.9	9.1	9.3	3.8	1.3	1.1	2.4	1.2	1.5	3	116	414	298	256.897
EE1DCD2E5E	YK925	77482_2	77434_1	M	HIGH FAT	2021-09-28	5	14	38270	10393	27877	5366.5	5029.33	337.167	0.191627	0.760022	0.0582609	0.825314	0.133366	-0.0652922	2087.98	512.591	105	101	2.7	110	19852.5	63	76	86	87	0	2.1	13	18.6	13.9	6.7	1.7	1.4	3.1	1.2	1.8	3	92	501	409	444.565
EE1DCD2E5F	YK951	78108_2	78124_1	M	HIGH FAT	2021-10-16	2	12	NA	NA	NA	NA	NA	NA	0.0798964	0.868454	0.024641	0.891513	0.0552553	-0.0230586	862.747	189.243	95	71	1.5	86	18540	69	50	63	50	0	2	11.4	6.6	7.5	3.9	1.3	1.3	2.6	1.1	1.8	0	151	408	257	170.199
EE1DCD2E60	YK972	78112_2	78086_1	F	LOW FAT	2021-10-24	2	13	64021	28292	35729	8660	8904.67	-244.667	0.0504818	0.872839	0.045323	0.872817	0.00515877	2.20042e-05	121.038	98.4546	101	96	0.166667	24	12577.5	74	46	64	31	0	2	8.5	2.1	4.7	2.2	1	1	2	1.1	1.5	0	144	288	144	100
EE1DCD2E61	YK966	78153_2	78117_1	F	LOW FAT	2021-10-23	2	9	39483	15583	23900	5566	4780	786	0.0576289	0.868316	0.0517757	0.836355	0.00585317	0.031961	101.805	88.237	69	60	0.466667	80	13387.5	55	56	61	28	0	1.7	5.6	1.9	2.7	1.2	0.7	0.7	1.4	0.9	0.9	0	118	218	100	84.7458
EE1DCD2E62	YK950	77660_2	78053_1	F	LOW FAT	2021-10-13	2	9	38827	17219	21608	6430	4528.67	1901.33	0.150067	0.784685	0.0600366	0.870952	0.0900303	-0.086267	583.954	146.524	93	69	0.5	69	13972.5	NA	NA	NA	NA	NA	1.8	9.9	4.1	7.6	2.9	0.9	0.8	1.7	0.9	1.5	1	109	266	157	144.037
EE1DCD2E63	YK996	78111_2	78032_1	F	LOW FAT	2021-11-09	2	8	58148	27408	30740	7786	7773.33	12.6667	0.0531241	0.860389	0.0911696	0.832778	-0.0380455	0.0276109	13.9833	102.1	71	87	0.166667	71	13755	77	65	71	35	0	1.9	6.8	1.4	3	1.7	0.9	0.9	1.8	1	1.2	0	127	245	118	92.9134
EE1DCD2E64	YK921	78031_2	78072_1	M	LOW FAT	2021-09-25	1	11	NA	NA	NA	NA	NA	NA	0.0910141	0.837363	0.0598566	0.862616	0.0311575	-0.0252532	518.024	294.553	128	121	0.7	87	18225	73	84	50	23	0	1.9	10.4	6.3	7.9	3.9	1.2	1.3	2.5	1.3	1.4	0	116	413	297	256.034
EE1DCD2E65	YK984	78050_2	78150_1	F	HIGH FAT	2021-11-03	3	7	NA	NA	NA	NA	NA	NA	0.168994	0.762615	0.0659857	0.846165	0.103009	-0.0835499	538.892	124.831	67	64	1.5	94	16440	78	63	54	22	0	1.8	6.8	4.5	7.9	3.1	0.9	0.9	1.8	1	1	0	107	232	125	116.822
EE1DCD2E66	YK924	78032_2	78088_1	F	LOW FAT	2021-09-25	1	5	63161	26447	36714	8011	9182	-1171	0.0688384	0.842609	0.0871591	0.82572	-0.0183207	0.0168897	77.7053	129.602	66	87	NA	61	16065	68	68	67	27	0	1.8	6.2	1.7	3.1	1.6	0.8	0.8	1.6	0.9	1	0	100	227	127	127
EE1DCD2E67	YK901	77667_2	77426_1	M	HIGH FAT	2021-09-09	2	11	NA	NA	NA	NA	NA	NA	0.163655	0.77577	0.0435125	0.859928	0.120143	-0.0841581	1448.93	271.524	93	79	0.7	81	18982.5	84	86	54	31	0	2.1	10.9	10.6	9.6	5	1.2	1.2	2.4	1.5	1.4	0	113	393	280	247.788
EE1DCD2E68	YK915	78078_2	78123_1	M	HIGH FAT	2021-09-25	1	9	41387	18857	22530	5533	5829.33	-296.333	0.114549	0.770773	0.0563855	0.854177	0.0581633	-0.0834032	786.04	293.559	87	70	0.7	95	25132.5	74	118	48	31	0	1.8	10.8	12	10.1	4.7	1.3	1.2	2.5	1.2	1.4	2	104	389	285	274.038
EE1DCD2E69	YK962	77503_2	77409_1	F	HIGH FAT	2021-10-18	2	9	NA	NA	NA	NA	NA	NA	0.0494935	0.864297	0.0383509	0.851193	0.0111426	0.0131044	177.127	118.043	62	64	0.766667	80	15855	49	73	76	61	0	1.8	5.5	1.7	4.3	1	0.7	0.7	1.4	0.9	0.9	0	105	214	109	103.81
EE1DCD2E6A	YK941	77669_2	77433_1	M	HIGH FAT	2021-10-09	6	7	34369	17512	16857	4751	4400	351	0.104932	0.831054	0.0417848	0.868819	0.0631471	-0.0377653	625.691	176.415	90	91	0.4	96	16597.5	104	66	70	64	0	1.9	9.8	11.1	8.7	4.4	1.3	1.2	2.5	1.1	1.1	2	144	414	270	187.5
EE1DCD2E6B	YK911	77455_2	77413_1	M	LOW FAT	2021-09-13	5	8	NA	NA	NA	NA	NA	NA	0.138403	0.7963	0.0535028	0.852684	0.0849003	-0.0563834	737.434	202.322	99	82	0.9	107	15907.5	89	111	61	33	0	1.9	16.2	1.5	8.9	5.1	1.5	1.5	3	1.2	1.4	0	138	399	261	189.13
EE1DCD2E6C	YK916	78078_2	78123_1	F	LOW FAT	2021-09-25	1	9	54634	28092	26542	6826	7192	-366	0.0846739	0.809185	0.0597778	0.840133	0.0248961	-0.0309486	247.509	136.296	55	57	0.35	80	15060	NA	NA	NA	NA	NA	1.8	3.1	1.7	4	1.5	0.7	0.7	1.4	0.7	1	0	90	202	112	124.444
EE1DCD2E6D	YK985	78115_2	78224_1	M	LOW FAT	2021-11-03	2	12	NA	NA	NA	NA	NA	NA	0.0572737	0.879734	0.0584	0.852178	-0.0011263	0.027556	309.285	330.828	91	92	0.5	77	11115	68	58	66	29	0	1.8	8	3.1	3.3	2.4	1.2	1.2	2.4	1.1	1.4	0	92	321	229	248.913
EE1DCD2E6E	YK935	78266_1	78121_1	M	LOW FAT	2021-10-03	1	7	NA	NA	NA	NA	NA	NA	0.213902	0.740524	0.0585135	0.851126	0.155389	-0.110602	1752.5	340.905	135	108	0.9	95	15180	76	119	84	62	0	1.9	11.2	13.8	12.2	8	1.2	1.2	2.4	2	1.4	1	92	390	298	323.913
EE1DCD2E6F	YK980	78414_2	78149_1	F	HIGH FAT	2021-11-02	1	8	NA	NA	NA	NA	NA	NA	0.0843485	0.828394	0.0630241	0.839107	0.0213244	-0.0107126	203.544	123.909	46	85	0.633333	109	15900	71	43	78	30	0	1.8	6.6	1.9	4	1.4	1	1.1	2.1	0.8	1.2	0	108	221	113	104.63
EE1DCD2E70	YK952	78108_2	78124_1	F	LOW FAT	2021-10-16	2	12	NA	NA	NA	NA	NA	NA	0.0291708	0.888905	0.0477778	0.859012	-0.018607	0.0298931	13.6305	92.5877	81	61	NA	95	14392.5	NA	NA	NA	NA	NA	2	5.2	0.7	1.3	1.1	0.8	0.8	1.6	1.2	1	0	113	200	87	76.9912
EE1DCD2E71	YK902	77667_2	77426_1	F	LOW FAT	2021-09-09	2	11	NA	NA	NA	NA	NA	NA	0.0789731	0.832433	0.047093	0.858527	0.0318801	-0.0260943	311.44	137.892	99	96	0.1	78	15075	107	79	51	20	0	1.9	7.5	2	4.1	1.2	0.9	0.8	1.7	1	0.8	0	101	220	119	117.822
EE1DCD2E72	YK908	77504_2	77428_1	F	HIGH FAT	2021-09-13	5	3	NA	NA	NA	NA	NA	NA	0.0939969	0.817778	0.0583951	0.848673	0.0356019	-0.0308951	221.934	92.7192	66	49	0.4	95	15405	80	61	55	46	0	2	7.7	2.7	5.3	2.4	0.9	0.9	1.8	1	1	0	121	230	109	90.0826
EE1DCD2E73	YK913	77427_2	77471_1	M	LOW FAT	2021-09-14	5	11	NA	NA	NA	NA	NA	NA	0.129312	0.806189	0.046891	0.864615	0.0824213	-0.0584263	825.427	212.9	107	99	1.3	85	15337.5	104	158	67	42	0	1.6	11.2	6.9	6.9	4.3	1.3	1.3	2.6	1.2	1.4	0	126	361	235	186.508
EE1DCD2E74	YK955	78086_2	78118_1	M	LOW FAT	2021-10-16	2	6	NA	NA	NA	NA	NA	NA	0.16955	0.779813	0.0878283	0.837955	0.0817222	-0.0581411	474.756	177.07	121	103	2.2	87	18697.5	132	225	70	39	0	2.1	12.4	10.6	9.9	4.6	1.3	1.3	2.6	1.4	1.7	1	155	402	247	159.355
EE1DCD2E75	YK949	77664_2	78053_1	M	HIGH FAT	2021-10-13	2	9	34550	11931	22619	4845.5	4581.67	263.833	0.128682	0.81404	0.0421667	0.879067	0.0865151	-0.0650271	980.316	227.814	88	67	1.5	88	17617.5	107	145	76	58	0	2	9.3	7.3	6.1	3.2	NA	1.8	NA	1.2	1.4	0	123	372	249	202.439
EE1DCD2E76	YK976	78107_2	78267_1	F	LOW FAT	2021-10-31	2	10	NA	NA	NA	NA	NA	NA	0.14252	0.964402	0.051982	0.84967	0.090538	0.114732	416.233	113.713	58	NA	NA	NA	NA	NA	NA	NA	NA	NA	NA	NA	NA	NA	NA	NA	NA	NA	NA	NA	0	119	NA	NA	NA
EE1DCD2E77	YK971	78112_2	78086_1	M	HIGH FAT	2021-10-24	2	13	129080	62512	66568	17890.5	18961.7	-1071.17	0.246208	0.695717	0.0601865	0.833869	0.186021	-0.138153	1084.31	141.545	84	87	1.1	96	17880	88	154	57	53	0	2.1	11	14.8	9	8	1.2	1.1	2.3	1.3	1.8	3	163	420	257	157.669
EE1DCD2E78	YK979	78414_2	78149_1	M	LOW FAT	2021-11-02	1	8	NA	NA	NA	NA	NA	NA	0.075853	0.865031	0.0577876	0.852153	0.0180654	0.0128772	342.573	242.263	93	83	2.3	99	17002.5	67	51	63	37	0	2.1	10	4.8	5.7	1.8	1.2	1.3	2.5	1.2	1.6	0	134	384	250	186.567
EE1DCD2E79	YK977	77457_2	77475_1	M	HIGH FAT	2021-11-01	7	7	NA	NA	NA	NA	NA	NA	0.228696	0.715055	0.0647354	0.85172	0.163961	-0.136665	1175.73	203.168	110	94	1.9	100	19380	128	116	67	53	0	2.1	12.9	19	15.4	7.9	1.3	1.3	2.6	1.4	1.7	2	145	463	318	219.31
EE1DCD2E7A	YK904	77471_2	77482_1	F	LOW FAT	2021-09-11	5	12	NA	NA	NA	NA	NA	NA	0.0380584	0.860567	0.0336634	0.856964	0.00439505	0.00360331	117.157	92.8869	66	71	0.2	70	14872.5	65	69	62	26	0	1.8	5.3	1.1	2.4	1.3	0.7	0.8	1.5	0.8	1	0	112	203	91	81.25
EE1DCD2E7B	YK927	78079_2	78182_3	M	HIGH FAT	2021-10-02	1	10	NA	NA	NA	NA	NA	NA	0.164499	0.778021	0.0544074	0.85837	0.110091	-0.0803498	1206.81	291.763	87	51	1.2	99	18622.5	97	65	54	37	0	1.9	10.6	11.8	10.2	4.3	1.3	1.2	2.5	1.2	1.4	1	110	390	280	254.545
EE1DCD2E7C	YK965	78153_2	78117_1	M	HIGH FAT	2021-10-23	2	9	33611	11931	21680	5234	4286	948	0.1711	0.785375	0.0442105	0.865338	0.12689	-0.0799635	1116.33	185.243	83	53	1.3	99	25680	88	78	94	82	0	2.1	10.7	12.1	7.6	4	1.3	1.3	2.6	1.2	1.9	1	152	430	278	182.895
EE1DCD2E7D	YK963	78204_2	78172_1	M	HIGH FAT	2021-10-23	2	11	47405	14708	32697	7021.5	5529	1492.5	0.202443	0.747741	0.0723387	0.819032	0.130105	-0.0712909	795.987	192.294	79	55	1.4	93	20632.5	99	58	160	137	0	2	10.2	14.2	8.9	4.8	1.2	1.2	2.4	1.3	1.8	3	141	415	274	194.326
EE1DCD2E7E	YK983	78050_2	78150_1	M	LOW FAT	2021-11-03	3	7	NA	NA	NA	NA	NA	NA	0.116353	0.818171	0.0512941	0.861176	0.0650591	-0.0430051	751.3	256.553	94	80	1.2	71	13777.5	84	121	63	31	0	1.6	10.2	4.7	7.5	2.9	1.2	1.3	2.5	1.1	1.3	0	108	320	212	196.296
EE1DCD2E7F	YK938	78170_2	78037_1	F	HIGH FAT	2021-10-05	1	11	NA	NA	NA	NA	NA	NA	0.111183	0.811935	0.0724194	0.841237	0.0387634	-0.0293011	437.342	237.809	70	71	0.2	89	16695	68	53	90	38	0	1.7	6.4	3.8	5.3	2.1	0.7	0.8	1.5	0.8	0.6	0	80	220	140	175
EE1DCD2E80	YK912	77455_2	77413_1	F	HIGH FAT	2021-09-13	5	8	NA	NA	NA	NA	NA	NA	0.186076	0.739803	0.0720462	0.843531	0.11403	-0.103728	549.519	120.56	73	59	0.233333	93	21007.5	49	50	64	39	0	1.8	7.7	6	9.2	3.1	0.9	1	1.9	1.2	1.3	0	120	255	135	112.5
EE1DCD2E81	YK948	77660_2	78243_1	F	LOW FAT	2021-10-11	1	11	49730	21591	28139	7641.5	6294	1347.5	0.0493258	0.861498	0.0443295	0.865709	0.00499634	-0.00421068	127.658	103.603	50	51	0.166667	90	20047.5	65	68	71	34	0	1.9	5.5	1.2	2.5	1.5	0.6	0.6	1.2	1	0.9	0	100	213	113	113
EE1DCD2E82	YK992	78416_2	78114_1	F	HIGH FAT	2021-11-09	1	11	41454	18927	22527	6168	5353.33	814.667	0.0844828	0.83296	0.0640064	0.850737	0.0204763	-0.0177774	194.442	118.415	47	54	0.3	90	14917.5	60	44	107	48	0	1.9	6.3	2	4.3	1.8	0.7	0.8	1.5	0.7	1.4	0	119	244	125	105.042
EE1DCD2E83	YK900	77474_2	77370_1	F	LOW FAT	2021-09-08	5	9	NA	NA	NA	NA	NA	NA	0.0487963	0.844583	0.0623509	0.845649	-0.0135546	-0.00106579	77.9403	127.082	85	76	0.166667	88	21030	60	69	65	35	0	2	6.6	1.3	3.3	1.1	0.8	0.7	1.5	0.9	1	0	108	213	105	97.2222
EE1DCD2E84	YK954	78122_2	78104_1	F	LOW FAT	2021-10-16	2	7	NA	NA	NA	NA	NA	NA	0.0510092	0.863456	0.0442813	0.856177	0.00672783	0.00727829	130.387	101.7	83	73	0.5	79	14400	61	80	71	38	0	2	5.8	1.8	2.6	1.1	NA	1.3	NA	0.7	1.3	0	112	221	109	97.3214
EE1DCD2E85	YK929	78276_2	78043_1	M	HIGH FAT	2021-10-02	1	13	NA	NA	NA	NA	NA	NA	0.138418	0.800207	0.0414634	0.872846	0.0969547	-0.0726384	1341.18	295.781	86	81	1.5	89	12540	114	80	66	44	0	1.9	9.5	9.6	8.3	4.7	1.2	1.2	2.4	1.2	1.4	0	104	370	266	255.769
EE1DCD2E86	YK934	78157_2	78125_1	F	HIGH FAT	2021-10-03	1	8	NA	NA	NA	NA	NA	NA	0.0474874	0.873501	0.047277	0.866291	0.000210442	0.00720976	181.529	182.614	63	64	0.166667	80	11430	70	61	66	34	0	1.8	5.2	1.6	2.4	1	0.8	0.8	1.6	0.5	0.7	0	89	209	120	134.831
EE1DCD2E87	YK978	77457_2	77475_1	F	LOW FAT	2021-11-01	7	7	NA	NA	NA	NA	NA	NA	NA	NA	0.065045	0.842012	NA	NA	NA	NA	93	67	0.433333	79	12907.5	79	68	60	23	0	2	7.5	2.9	5.2	2.1	0.8	0.8	1.6	0.9	1.2	0	125	241	116	92.8
EE1DCD2E88	YK945	78043_2	77453_1	M	LOW FAT	2021-10-10	1	12	46161	20102	26059	5914.5	6065.33	-150.833	0.109396	0.825198	0.0576886	0.879124	0.0517078	-0.0539259	412.147	153.507	113	98	1	90	16005	127	100	70	38	0	2.1	11.6	6.8	5.2	3.7	1.5	1.3	2.8	1.2	1.5	0	160	378	218	136.25
EE1DCD2E89	YK970	78181_2	78122_1	F	HIGH FAT	2021-10-24	2	9	53423	23575	29848	6150.5	6727.67	-577.167	0.0908745	0.829747	0.0450394	0.861575	0.0458352	-0.0318283	317.832	99.4364	81	62	0.433333	92	18862.5	38	53	67	21	0	2.1	7.1	4	4.1	1.9	NA	1.5	NA	1	0.6	0	140	282	142	101.429
EE1DCD2E8A	YK990	78105_2	78152_1	F	LOW FAT	2021-11-08	3	13	39296	19659	19637	5025.5	6194	-1168.5	0.0626168	0.844346	0.0577441	0.847542	0.00487271	-0.00319629	134.402	115.346	70	70	0.233333	71	16027.5	81	53	71	28	0	1.8	6.3	2.1	3.3	1.1	0.7	0.8	1.5	0.8	1	0	111	242	131	118.018
EE1DCD2E8B	YK958	78051_2	78080_1	F	HIGH FAT	2021-10-16	2	6	NA	NA	NA	NA	NA	NA	NA	NA	NA	NA	NA	NA	NA	NA	NA	NA	NA	NA	NA	NA	NA	NA	NA	NA	NA	NA	NA	NA	NA	NA	NA	NA	NA	NA	0	NA	NA	NA	NA
EE1DCD2E8C	YK961	77503_2	77409_1	M	LOW FAT	2021-10-18	2	9	NA	NA	NA	NA	NA	NA	0.167119	0.767616	0.0539506	0.843025	0.113169	-0.0754088	766.19	154.617	106	79	1.03333	80	13815	75	134	80	48	0	2	8.5	7.3	6	3.6	0.9	0.9	1.8	1.2	1.4	0	128	295	167	130.469
EE1DCD2E8F	YK959	77447_2	78376_1	M	LOW FAT	2021-10-16	1	11	NA	NA	NA	NA	NA	NA	0.147259	0.79888	0.0458275	0.867902	0.101431	-0.0690223	722.431	135.589	121	84	1.4	94	13507.5	62	132	59	35	0	2.1	9.2	9.4	7.7	4.6	1.2	1.2	2.4	1	1.2	0	164	352	188	114.634
EE1DCD2E90	YK1082	78267_2	78417_1	F	HIGH FAT	2021-12-31	1	4	46765	21936	24829	5929	6320	-391	0.0986006	0.816336	0.06375	0.857348	0.0348506	-0.041012	272.608	129.385	59	53	0.25	84	19357.5	59	42	94	65	0	1.8	5.3	4.8	5.5	0.7	0.7	0.6	1.3	0.8	1.5	0	105	244	139	132.381
EE1DCD2E91	YK1033	78113_2	78203_1	M	LOW FAT	2021-12-02	2	9	37602	14438	23164	5923.5	3805	2118.5	0.160234	0.782982	0.0920062	0.819259	0.0682277	-0.0362768	543.408	253.085	122	115	3.8	98	16102.5	126	170	198	222	0	1.8	13.6	13.1	8.4	6.4	1.4	1.3	2.7	1.3	1.8	0	128	428	300	234.375
EE1DCD2E92	YK1044	78419_2	78276_1	F	LOW FAT	2021-12-06	1	9	57652	23233	34419	7283	8381.33	-1098.33	0.157122	0.751865	0.0724167	0.820444	0.0847052	-0.0685795	310.433	73.3546	77	65	0.866667	75	15300	86	120	78	50	0	1.8	7.5	5.1	6.4	2.5	0.9	0.9	1.8	0.8	1.5	0	130	241	111	85.3846
EE1DCD2E93	YK1080	78417_2	78181_1	F	HIGH FAT	2021-12-31	1	3	49430	23671	25759	6546	7013.33	-467.333	0.120881	0.809821	0.0843056	0.829236	0.0365757	-0.0194149	289.827	165.51	63	62	NA	82	14527.5	38	64	81	53	0	1.9	7	5.5	6.3	2.9	0.9	1	1.9	0.9	1.1	0	114	274	160	140.351
EE1DCD2E94	YK1021	77485_2	77487_1	M	HIGH FAT	2021-11-24	7	13	43126	13215	29911	6254	5796.67	457.333	0.148599	0.7887	0.0716987	0.836731	0.0769004	-0.0480303	687.17	258.006	81	73	0.9	92	18862.5	79	89	64	35	NA	2	10.6	11.6	11.2	3.6	1.4	1.3	2.7	1.1	1.2	1	129	426	297	230.233
EE1DCD2E95	YK1028	78312_2	78414_1	F	HIGH FAT	2021-11-28	8	11	37685	19777	17908	5508.5	4781.33	727.167	0.117448	0.787799	0.0760882	0.830854	0.04136	-0.043055	166.618	63.7765	44	35	NA	107	14745	NA	NA	NA	NA	NA	1.8	6	3.2	4.5	1.7	0.8	0.9	1.7	0.8	1	0	130	227	97	74.6154
EE1DCD2E97	YK1072	78071_2	78170_1	F	LOW FAT	2021-12-25	4	12	66062	23056	43006	8343.5	8294.67	48.8333	0.0398211	0.868976	0.0428421	0.866667	-0.00302097	0.00230894	100.573	116.364	73	78	0.266667	73	12817.5	65	60	68	26	0	1.8	6	1.1	2.7	0.8	0.8	0.7	1.5	1	1.2	0	103	227	124	120.388
EE1DCD2E98	YK1004	78053_2	78079_1	F	HIGH FAT	2021-11-13	3	9	NA	NA	NA	NA	NA	NA	0.100631	0.817988	0.055841	0.849633	0.0447904	-0.0316448	275.301	100.5	55	70	0.533333	84	14850	60	47	56	30	0	1.6	7	2.9	5.4	2.2	0.8	0.7	1.5	0.9	1.4	0	125	252	127	101.6
EE1DCD2E99	YK1043	78419_2	78276_1	M	HIGH FAT	2021-12-06	1	9	48780	18951	29829	6978	6021.67	956.333	0.188035	0.749257	0.0644271	0.84737	0.123608	-0.0981127	677.526	135.56	60	50	1.6	92	17325	35	73	44	44	0	1.8	9.1	10.7	7.1	3.9	1.1	1.1	2.2	1.1	1.5	2	142	351	209	147.183
EE1DCD2E9A	YK998	78119_2	78153_1	F	LOW FAT	2021-11-10	3	12	56250	24879	31371	7514.5	7196.33	318.167	0.0704348	0.849362	0.0584815	0.846259	0.0119533	0.00310306	207.79	156.493	81	81	0.333333	85	20047.5	74	48	73	29	0	1.8	6.7	2	4	1.9	1	0.8	1.8	1	1.3	0	104	244	140	134.615
EE1DCD2E9B	YK1041	78070_2	78087_1	M	LOW FAT	2021-12-05	3	13	NA	NA	NA	NA	NA	NA	0.0973223	0.841477	0.0496561	0.870847	0.0476662	-0.0293692	461.534	176.845	82	85	1	89	18810	84	84	62	38	0	2	11.6	5.6	3.3	2.6	1.5	1.4	2.9	1.3	1.6	0	146	385	239	163.699
EE1DCD2E9C	YK1019	78243_2	78185_1	M	HIGH FAT	2021-11-22	3	9	32267	11904	20363	5061.5	3975	1086.5	0.206096	0.72957	0.0745455	0.83719	0.131551	-0.10762	768.256	173.679	73	53	2.9	93	16117.5	69	99	66	63	130	2.2	8.1	13.5	9.3	4.6	1.1	1.1	2.2	1.3	1	0	144	393	249	172.917
EE1DCD2E9D	YK1079	78070_2	78087_1	M	LOW FAT	2021-12-31	4	10	49926	17903	32023	7770.5	6051.67	1718.83	0.127081	0.817109	0.0603191	0.862979	0.0667619	-0.0458701	711.346	264.637	113	104	0.8	93	17857.5	64	94	67	41	0	2	10.4	7.1	6.7	3.7	1.3	1.3	2.6	1.2	1.3	0	116	374	258	222.414
EE1DCD2E9E	YK1036	78182_4	78070_1	F	LOW FAT	2021-12-05	3	8	49011	17814	31197	7078.5	6739.33	339.167	0.129876	0.782918	0.0833077	0.804564	0.0465678	-0.0216457	189.012	80.3971	71	72	0.366667	88	19207.5	91	63	60	34	0	2	7.4	3.4	3.8	2.2	0.9	0.9	1.8	1.2	0.9	1	144	262	118	81.9444
EE1DCD2E9F	YK1040	78149_2	78119_1	F	HIGH FAT	2021-12-05	4	14	48522	22963	25559	5898	7183.67	-1285.67	0.0835613	0.840712	0.0466667	0.85544	0.0368946	-0.014728	295.283	116.954	59	71	0.3	97	16755	77	47	90	43	0	1.7	7	2.4	5	1.9	0.9	0.9	1.8	0.8	0.9	0	119	259	140	117.647
EE1DCD2EA0	YK1034	78113_2	78203_1	F	HIGH FAT	2021-12-02	2	9	51939	20203	31736	8247	7123.67	1123.33	0.15944	0.760796	0.0752917	0.820417	0.0841479	-0.0596202	498.229	161.971	67	63	0.333333	80	14167.5	73	50	52	43	0	1.9	7.2	4.6	5.5	2.1	1	1	2	0.9	0.6	0	98	254	156	159.184
EE1DCD2EA1	YK1027	77446_2	77414_1	M	LOW FAT	2021-11-27	8	11	38480	15581	22899	5890.5	4401	1489.5	0.151836	0.782947	0.0537778	0.850889	0.098058	-0.067942	711.725	164.544	64	85	1.6	82	14580	47	138	49	40	0	2.2	10.7	9.5	6	4.1	1.2	1.2	2.4	1.1	1.9	1	139	364	225	161.871
EE1DCD2EA2	YK1094	78063_2	78422_1	F	LOW FAT	2022-01-04	3	12	48622	17176	31446	5925	6522.33	-597.333	0.0404634	0.877489	0.0560145	0.843043	-0.0155511	0.0344453	75.097	152.295	86	80	0.3	96	15577.5	66	66	71	37	0	1.9	6.3	1.7	4.3	0.9	0.9	0.8	1.7	1.1	0.7	0	108	242	134	124.074
EE1DCD2EA3	YK1030	77483_2	77415_1	F	HIGH FAT	2021-12-01	8	6	33398	17700	15698	4111	4474	-363	0.136846	0.784103	0.0732471	0.845632	0.063599	-0.0615296	318.752	107.829	70	60	0.333333	74	21675	48	41	54	34	0	1.9	7.3	4.5	5.5	1.9	1	1	2	1	0.9	0	136	284	148	108.824
EE1DCD2EA4	YK1065	78047_2	78421_1	M	LOW FAT	2021-12-19	1	11	50034	15194	34840	7368.5	6852	516.5	0.105542	0.824206	0.0307767	0.872362	0.0747648	-0.0481564	955.415	190.778	88	99	1	89	15397.5	64	147	54	40	0	1.7	10.4	7.1	6.7	2.5	1.3	1.2	2.5	1.2	1.1	2	118	351	233	197.458
EE1DCD2EA5	YK1016	78203_2	78107_1	F	HIGH FAT	2021-11-21	3	8	38916	18901	20015	5268	4883	385	0.190403	0.737042	0.0775591	0.706247	0.112844	0.0307949	363.926	97.2164	54	52	0.633333	87	19650	69	71	61	39	170	1.9	6.5	5.4	9.6	3.4	0.8	0.8	1.6	0.9	1.5	0	126	263	137	108.73
EE1DCD2EA6	YK1001	78085_2	78110_1	M	HIGH FAT	2021-11-13	3	10	44561	13904	30657	6242	5847.67	394.333	0.0780952	0.861079	0.0272549	0.887731	0.0508403	-0.0266517	911.305	242.345	92	80	0.7	96	17812.5	58	60	65	38	0	2	10.9	8.6	4.7	3.2	1.5	1.4	2.9	1.3	1.3	0	138	444	306	221.739
EE1DCD2EA7	YK1061	78148_2	78048_1	M	HIGH FAT	2021-12-18	4	12	32896	14964	17932	4360	4449.67	-89.6667	0.228564	0.724704	0.068396	0.853734	0.160168	-0.12903	932.686	162.318	76	64	2.5	107	21780	76	110	55	63	0	2	7.6	15.7	12.6	6.1	1.2	1.3	2.5	1	0.8	3	155	430	275	177.419
EE1DCD2EA8	YK1064	78104_2	78069_1	F	HIGH FAT	2021-12-19	4	11	40233	13486	26747	6061	5217	844	0.0846729	0.838458	0.0448421	0.86414	0.0398308	-0.0256824	325.352	118.568	30	45	0.233333	95	15075	57	41	61	35	0	1.9	5.7	2.3	3.2	0.7	0.8	0.8	1.6	0.8	1	0	102	227	125	122.549
EE1DCD2EA9	YK1037	78030_2	78109_1	M	HIGH FAT	2021-12-05	3	12	NA	NA	NA	NA	NA	NA	0.121893	0.818609	0.0353889	0.879556	0.0865041	-0.0609465	1062.48	214.114	94	79	1.8	88	20370	72	60	70	47	0	1.9	10.2	9.1	11.3	4.7	1.2	1.2	2.4	1.2	1.3	2	140	439	299	213.571
EE1DCD2EAA	YK1017	78172_2	78063_1	M	LOW FAT	2021-11-21	3	9	45337	18097	27240	5747	6041.67	-294.667	0.125868	0.814849	0.0607619	0.857548	0.0651061	-0.0426984	505.172	177.597	123	108	2.1	86	20265	149	123	55	31	150	2.2	12.4	10.6	9.7	5	1.4	1.4	2.8	1.5	1.5	3	162	465	303	187.037
EE1DCD2EAB	YK1035	78182_4	78070_1	M	HIGH FAT	2021-12-05	3	8	35031	10497	24534	5714	4358.67	1355.33	0.156144	0.781975	0.0667808	0.856279	0.089363	-0.0743032	635.077	187.103	73	68	2.7	72	21705	96	116	64	61	0	2.1	13.8	10.6	11.1	5.1	1.4	1.4	2.8	1.4	2.2	0	164	482	318	193.902
EE1DCD2EAC	YK1069	77475_2	77486_1	M	HIGH FAT	2021-12-23	9	9	39935	17080	22855	5505.5	5306.67	198.833	0.184583	0.759991	0.0666667	0.841355	0.117917	-0.0813644	1019.67	265.288	83	70	1.9	107	18240	90	111	72	53	0	2	11.4	13.7	10.1	5.1	1.3	1.2	2.5	1.1	0.7	0	107	407	300	280.374
EE1DCD2EAD	YK1092	78420_2	78052_1	F	LOW FAT	2022-01-04	3	12	53710	22953	30757	7510.5	7204.33	306.167	0.0301833	0.866833	0.0443972	0.862553	-0.0142138	0.00428014	44.6486	113.822	68	81	NA	79	12337.5	39	49	80	31	0	1.8	6	1.3	2	0.9	0.9	0.9	1.8	1.1	0.6	2	107	234	127	118.692
EE1DCD2EAE	YK1077	78052_2	78419_1	M	LOW FAT	2021-12-30	1	11	45908	18636	27272	7229	5339.33	1889.67	0.13798	0.784973	0.0489778	0.837956	0.0890027	-0.0529827	1053.18	283.452	74	70	1	87	15667.5	67	140	71	41	0	2	9.9	6.8	6	6.1	1.1	1	2.1	1	1.3	0	97	343	246	253.608
EE1DCD2EAF	YK1075	78150_2	78071_1	M	LOW FAT	2021-12-28	5	5	44479	18997	25482	5968.5	5785.33	183.167	0.170062	0.772014	0.047695	0.856844	0.122367	-0.0848297	1318.66	258.482	118	115	3.6	97	15772.5	83	148	74	54	0	1.6	10.5	14.2	9.2	6.3	1.3	1.3	2.6	2.1	1.4	0	121	393	272	224.793
EE1DCD2EB0	YK1046	77410_2	77669_1	F	LOW FAT	2021-12-06	4	8	60766	21127	39639	8477.5	8679	-201.5	0.103361	0.806283	0.061612	0.841612	0.0417487	-0.0353294	234.146	90.8191	72	76	0.466667	94	20467.5	61	99	63	27	0	1.9	7.8	4.9	4.2	1.7	1	0.9	1.9	1.1	1.3	1	136	268	132	97.0588
EE1DCD2EB1	YK1002	78085_2	78110_1	F	LOW FAT	2021-11-13	3	10	38323	16572	21751	5721.5	4845.33	876.167	0.0878378	0.828694	0.0274468	0.870213	0.060391	-0.0415191	655.814	124.902	57	56	0.366667	74	20032.5	83	63	60	28	0	1.9	7	2.3	2.8	1.6	0.8	0.8	1.6	0.7	0.7	0	108	243	135	125
EE1DCD2EB2	YK1023	77457_2	77475_1	M	HIGH FAT	2021-11-27	8	9	42657	21242	21415	5910.5	5441.33	469.167	0.183464	0.761227	0.0746259	0.840181	0.108838	-0.0789541	667.639	182.902	98	82	2.5	97	20145	61	56	57	45	0	2	13.7	18.4	15.6	6	1.4	1.2	2.6	1.4	1.2	3	162	484	322	198.765
EE1DCD2EB3	YK1020	78243_2	78185_1	F	LOW FAT	2021-11-22	3	9	34927	16837	18090	4696	4052.67	643.333	0.0748611	0.820774	0.106216	1.04396	-0.0313551	-0.22319	60.0085	78.4907	38	56	0.6	78	15907.5	80	51	70	38	0	1.8	5.5	2.3	3.5	1.3	0.7	0.7	1.4	1.1	0.7	0	108	200	92	85.1852
EE1DCD2EB4	YK1060	78154_2	78051_1	F	LOW FAT	2021-12-18	4	6	50614	20926	29688	6401	6863.67	-462.667	0.048254	0.868268	0.0310185	0.870679	0.0172354	-0.00241061	232.736	113.297	77	80	NA	89	17565	70	42	95	38	0	1.5	6.3	1	3.5	1.4	0.7	0.8	1.5	1	1.2	0	123	244	121	98.374
EE1DCD2EB5	YK1022	77485_2	77487_1	F	LOW FAT	2021-11-24	7	13	53234	22714	30520	6509.5	6910.67	-401.167	0.0312928	0.884455	0.0530924	0.849759	-0.0217995	0.0346958	51.9667	168.359	79	85	0.6	75	15022.5	77	64	68	31	0	1.8	7.2	1.7	3	1.7	0.8	0.8	1.6	1	1.1	2	102	245	143	140.196
EE1DCD2EB6	YK1039	78149_2	78119_1	M	LOW FAT	2021-12-05	4	14	33372	13813	19559	4863	3955	908	0.134733	0.810525	0.0611635	0.865472	0.0735692	-0.0549469	612.802	203.041	108	99	1.4	89	14812.5	93	90	110	74	0	2	9.5	7.9	6.3	2.8	1.2	1.2	2.4	1	1.8	1	127	367	240	188.976
EE1DCD2EB7	YK1032	78421_2	78120_1	F	HIGH FAT	2021-11-30	1	11	45224	16882	28342	8165	4970.33	3194.67	0.122725	0.793516	0.0478947	0.831842	0.0748298	-0.0383261	638.37	174.881	64	66	0.233333	91	18862.5	40	42	61	41	0	1.8	6.3	4.8	5.8	2.5	0.7	0.6	1.3	0.8	0.8	0	92	242	150	163.043
EE1DCD2EB8	YK1003	78053_2	78079_1	M	LOW FAT	2021-11-13	3	9	42723	17033	25690	5664.5	5535.33	129.167	0.0592018	0.881307	0.03336	0.897733	0.0258418	-0.0164263	439.488	198.438	118	102	0.8	85	16455	60	64	68	29	0	1.9	11	4.9	4.7	2.6	1.2	1.1	2.3	1.2	1.5	0	146	400	254	173.973
EE1DCD2EB9	YK1013	78069_2	78157_1	M	HIGH FAT	2021-11-20	3	11	35153	14931	20222	5403.5	3991.33	1412.17	0.208848	0.730851	0.0633333	0.854799	0.145514	-0.123948	907.988	161.35	102	77	3	98	23047.5	111	163	55	49	140	2	11.5	17.5	13.5	6.9	NA	2.5	NA	1.4	1.8	3	169	459	290	171.598
EE1DCD2EBA	YK1177	78076_2	78184_1	F	HIGH FAT	2022-02-22	5	11	37554	17262	20292	5217.5	5039.33	178.167	0.148625	0.78171	0.0380808	0.877845	0.110544	-0.0961351	960.477	141.961	87	80	1.63333	100	18547.5	100	88	46	42	0	1.9	8.6	4.6	1.3	NA	1.3	1.3	2.6	9.1	NA	0	113	284	171	151.327
EE1DCD2EBB	YK1057	78088_2	78055_1	M	LOW FAT	2021-12-14	4	10	62812	19962	42850	9794.5	7611.33	2183.17	0.138254	0.791478	0.0544444	0.85325	0.0838095	-0.0617718	611.02	159.729	79	75	1.6	97	17947.5	98	143	57	38	0	1.9	10	6.6	3.5	2.9	1.3	1.2	2.5	1.3	1.5	0	125	358	233	186.4
EE1DCD2EBC	YK1076	78150_2	78071_1	F	HIGH FAT	2021-12-28	5	5	60540	25147	35393	7255	8348	-1093	0.142861	0.798167	0.0588162	0.610685	0.0840449	0.187481	444.809	193.159	66	62	NA	87	15307.5	75	68	92	49	0	1.8	6.7	5.4	6.9	2.1	0.8	0.8	1.6	0.9	1.1	0	125	262	137	109.6
EE1DCD2EBD	YK1012	78152_2	78415_1	F	LOW FAT	2021-11-20	1	10	52439	24522	27917	7564.5	6742	822.5	0.0781159	0.830998	0.0552853	0.850661	0.0228307	-0.0196623	163.498	82.176	56	74	0.5	90	16530	62	64	72	32	85	1.9	5.7	2	3.3	1.1	0.8	0.8	1.6	0.9	0.6	0	122	230	108	88.5246
EE1DCD2EBE	YK1014	78069_2	78157_1	F	LOW FAT	2021-11-20	3	11	53696	23367	30329	8419	6751.67	1667.33	0.0980122	0.816131	0.0554785	0.851617	0.0425337	-0.0354857	281.321	106.848	81	109	0.1	80	13312.5	101	80	62	36	160	1.7	7.5	2.9	6.2	2.7	0.9	0.9	1.8	1.1	1	3	119	286	167	140.336
EE1DCD2EBF	YK1088	78117_2	78420_1	F	HIGH FAT	2022-01-03	3	13	63087	25892	37195	10027	8442	1585	0.0814307	0.838204	0.039304	0.870037	0.0421267	-0.0318327	398.602	131.854	54	58	0.3	99	17722.5	61	51	68	39	0	1.8	6.7	2.8	4.1	1.8	0.8	0.8	1.6	0.7	1.1	0	100	237	137	137
EE1DCD2EC0	YK1042	78106_2	78126_1	F	HIGH FAT	2021-12-06	4	8	45485	20304	25181	6016	5475.67	540.333	0.24164	0.703119	0.0493269	0.861923	0.192313	-0.158804	1364.91	143.942	87	88	1.3	109	21420	66	89	57	45	0	1.75	8.2	7	12.7	5.9	0.8	0.8	1.6	1	1.2	2	118	318	200	169.492
EE1DCD2EC1	YK1048	78125_2	78204_1	F	LOW FAT	2021-12-11	2	12	60654	17506	43148	6991	8804.67	-1813.67	0.114603	0.807071	0.0668347	0.840924	0.0477678	-0.0338532	244.384	92.7551	70	75	0.233333	99	16237.5	NA	NA	NA	NA	NA	1.9	7.6	3.5	5.2	1.7	0.9	0.7	1.6	0.9	1.3	0	120	252	132	110
EE1DCD2EC2	YK1047	78125_2	78204_1	M	HIGH FAT	2021-12-11	2	12	45636	10831	34805	6582	5778.33	803.667	0.239853	0.715653	0.0648571	0.843048	0.174996	-0.127394	1099.27	175.282	106	84	2.2	98	24532.5	101	187	76	56	0	2.1	14	25.2	12	6.4	1.4	1.4	2.8	1.3	1.4	3	143	489	346	241.958
EE1DCD2EC3	YK1056	78109_2	78085_1	F	HIGH FAT	2021-12-14	4	12	58576	18655	39921	7028	7866.67	-838.667	0.0739378	0.837565	0.0671111	0.852444	0.00682671	-0.0148797	102.507	80.6011	44	47	0.166667	107	19267.5	53	79	66	30	0	1.8	5.8	1.4	3.4	1	0.8	0.7	1.5	0.8	1.1	0	104	219	115	110.577
EE1DCD2EC4	YK1083	78072_2	78050_1	M	HIGH FAT	2022-01-01	4	5	51115	16413	34702	7998	6342.67	1655.33	0.145894	0.793819	0.0701865	0.835152	0.0757076	-0.0413321	458.187	155.242	90	83	1.4	110	21037.5	68	66	71	50	0	2	11.6	8.9	9.1	4.3	1.4	1.3	2.7	1.2	1.4	0	163	412	249	152.761
EE1DCD2EC5	YK1052	78118_2	78076_1	F	HIGH FAT	2021-12-13	4	11	46254	16625	29629	5620	6374	-754	0.0399709	0.889214	0.0695238	0.836022	-0.0295529	0.0531916	10.6366	104.681	55	59	NA	107	16267.5	45	46	107	54	0	1.9	6.2	1.1	1.9	0.8	0.9	0.9	1.8	1.1	1.1	0	118	251	133	112.712
EE1DCD2EC6	YK1073	78036_2	78108_1	M	HIGH FAT	2021-12-25	3	13	47018	21851	25167	8891.5	4705.67	4185.83	0.0960293	0.841705	0.0696947	0.690611	0.0263346	0.151095	307.046	260.053	81	65	NA	96	15645	85	69	552	306	0	2.1	9.7	10.2	6.8	3.4	1.3	1.1	2.4	1.1	1	2	152	405	253	166.447
EE1DCD2EC7	YK1009	78185_2	78151_1	M	LOW FAT	2021-11-14	3	10	45301	14631	30670	7122.5	5348.67	1773.83	0.107939	0.831736	0.0600278	0.843	0.0479109	-0.0112637	437.945	195.169	97	84	0.9	88	16927.5	84	75	54	26	0	1.9	10.6	7.7	6	2.7	1	1	2	1.3	1.6	0	141	380	239	169.504
EE1DCD2EC8	YK1029	77504_2	77428_1	M	LOW FAT	2021-11-28	8	3	57074	25815	31259	8198	7121	1077	0.0952186	0.837878	0.05472	0.85688	0.0404986	-0.019002	409.503	186.307	101	117	1.4	77	16297.5	64	74	181	90	0	2.1	10.6	7	5.7	3.7	1.2	1.2	2.4	1.7	0.9	1	146	405	259	177.397
EE1DCD2EC9	YK1062	78148_2	78048_1	F	LOW FAT	2021-12-18	4	12	58292	23830	34462	7534	8723.33	-1189.33	0.0333816	0.895185	0.0553086	0.842716	-0.021927	0.0524691	15.6808	103.6	62	79	0.366667	76	14865	64	70	58	37	0	2	5.8	1.1	1.8	1	0.8	0.9	1.7	1	1.1	0	124	233	109	87.9032
EE1DCD2ECA	YK1005	78268_2	78113_1	M	LOW FAT	2021-11-13	2	10	41161	18660	22501	5749.5	5224.33	525.167	0.0828867	0.860711	0.0566408	0.866279	0.0262459	-0.00556774	357.162	210.395	102	96	0.9	93	14062.5	75	77	58	42	0	2.1	12	9.3	6.6	3.5	1.2	1.3	2.5	1.5	1.6	0	149	429	280	187.919
EE1DCD2ECB	YK1050	78418_2	78133_1	F	LOW FAT	2021-12-13	2	7	45345	14062	31283	6282	6052.67	229.333	0.0600163	0.853072	0.0596605	0.844691	0.000355846	0.00838054	90.0155	90.7629	69	72	NA	84	13920	NA	NA	NA	NA	NA	1.9	6.6	1.8	3.5	1.1	0.8	0.8	1.6	1.1	0.7	0	109	224	115	105.505
EE1DCD2ECC	YK1093	78063_2	78422_1	M	HIGH FAT	2022-01-04	3	12	45945	19005	26940	6675.5	5611.67	1063.83	0.14179	0.800747	0.051341	0.86272	0.0904486	-0.061973	976.119	261.665	86	57	1.9	99	15720	86	116	68	50	0	2	8.6	8.1	9.2	4.2	1	1	2	1	1.4	0	106	354	248	233.962
EE1DCD2ECD	YK1084	78072_2	78050_1	F	LOW FAT	2022-01-01	4	5	47344	14384	32960	6294	5903.33	390.667	0.112143	0.796344	0.088087	0.812841	0.0240559	-0.016497	116.979	66.9757	65	70	0.4	91	15067.5	77	84	53	31	0	1.9	6.3	3.3	3.7	2.1	0.9	0.8	1.7	0.6	0.7	0	124	219	95	76.6129
EE1DCD2ECE	YK1067	78152_2	78415_1	M	HIGH FAT	2021-12-21	2	9	NA	NA	NA	NA	NA	NA	0.161462	0.787265	0.0687733	0.855253	0.0926888	-0.0679882	726.406	224.018	93	70	1.9	92	22372.5	69	78	61	50	0	2.1	12.7	13	16	4.6	1.6	1.5	3.1	1.3	1.6	2	144	465	321	222.917
EE1DCD2ECF	YK1087	78117_2	78420_1	M	LOW FAT	2022-01-03	3	13	33378	12888	20490	4692	4559.67	132.333	0.107413	0.823225	0.0658879	0.84271	0.0415256	-0.0194852	369.267	181.195	86	78	0.7	104	18712.5	69	87	52	27	0	2	9.3	6.8	4.9	2.5	1	1.1	2.1	0.9	1.3	0	129	323	194	150.388
EE1DCD2ED0	YK1053	78151_2	78416_1	M	LOW FAT	2021-12-13	2	12	47093	21509	25584	6296.5	6280	16.5	0.0421875	0.901364	0.0554798	0.856465	-0.0132923	0.044899	102.777	180.646	111	104	0.4	101	14520	83	134	122	68	0	2.1	12.5	5.8	2.5	1.9	1.1	1.1	2.2	1.3	1.5	0	134	403	269	200.746
EE1DCD2ED1	YK1006	78268_2	78113_1	F	HIGH FAT	2021-11-13	2	10	NA	NA	NA	NA	NA	NA	0.0884712	0.831767	0.0621368	0.847578	0.0263344	-0.0158114	223.705	123.109	90	96	0.433333	89	17092.5	52	52	72	35	0	1.9	7.7	4.2	5.9	2.5	1	1	2	1	1.4	0	129	398	269	208.527
EE1DCD2ED2	YK1068	78152_2	78415_1	F	LOW FAT	2021-12-21	2	9	58142	24920	33222	6961	8575.33	-1614.33	0.0915259	0.827807	0.0640067	0.863502	0.0275192	-0.0356943	224.987	117.878	75	67	0.2	87	17640	59	62	78	41	0	1.9	6.1	2.3	4.8	1.3	0.8	0.8	1.6	1	0.7	0	113	237	124	109.735
EE1DCD2ED3	YK1000	78415_2	78062_1	F	LOW FAT	2021-11-13	1	10	48698	22966	25732	6326.5	7100.33	-773.833	0.03189	0.880258	0.037585	0.865578	-0.005695	0.0146795	67.9638	101.316	82	79	NA	79	14790	71	65	61	33	0	1.6	6.8	1.2	1.6	0.9	0.7	0.6	1.3	0.9	1	0	110	221	111	100.909
EE1DCD2ED4	YK1010	78185_2	78151_1	F	HIGH FAT	2021-11-14	3	10	65439	24325	41114	8794	9156	-362	0.0775544	0.841256	0.0507	0.861567	0.0268544	-0.0203104	204.405	94.3088	66	63	0.3	88	18157.5	69	51	59	44	0	1.8	5.7	2.1	3.9	1.3	0.7	0.7	1.4	0.9	1.2	0	113	222	109	96.4602
EE1DCD2ED5	YK1058	78088_2	78055_1	F	HIGH FAT	2021-12-14	4	10	70805	28693	42112	9361	9791.67	-430.667	0.111779	0.813039	0.053244	0.851875	0.0585347	-0.0388358	346.115	102.812	71	69	0.133333	88	22620	50	55	75	52	0	1.8	7.4	2.7	5	2.1	0.8	0.9	1.7	1.3	1.2	0	111	283	172	154.955
EE1DCD2ED6	YK1086	78184_2	78146_1	F	LOW FAT	2022-01-03	5	15	54843	18092	36751	8692.5	7115.67	1576.83	0.0699667	0.842767	0.0645926	0.893963	0.00537407	-0.0511963	140.711	109.496	79	105	0.166667	78	15427.5	52	62	65	38	0	1.8	6.2	2.9	3.8	1	0.9	0.9	1.8	1	1	0	108	230	122	112.963
EE1DCD2ED7	YK1011	78152_2	78415_1	M	HIGH FAT	2021-11-20	1	10	38026	16285	21741	5352.5	4582	770.5	0.115835	0.820949	0.0526157	0.859329	0.0632197	-0.0383799	506.951	163.381	82	75	2.3	96	18915	78	70	66	43	120	2.1	10.9	7.7	10.1	4	1.3	1.3	2.6	1.3	1.6	0	168	417	249	148.214
EE1DCD2ED8	YK1090	78186_2	78036_1	F	HIGH FAT	2022-01-03	5	13	63970	25192	38778	8683	9053	-370	0.105841	0.808427	0.0422472	0.868315	0.0635939	-0.0598878	502.394	123.866	65	63	0.233333	85	15285	66	61	72	64	0	1.6	6.4	2.5	4.6	1.5	0.8	0.7	1.5	0.8	1.1	0	103	231	128	124.272
EE1DCD2ED9	YK1026	77375_2	77449_1	F	LOW FAT	2021-11-27	7	8	58650	24071	34579	7527.5	7763	-235.5	0.0614511	0.848865	0.0450847	0.869153	0.0163664	-0.0202876	167.982	92.0209	67	64	0.45	91	17932.5	66	70	81	43	0	2	6	1.6	3.7	1.8	0.9	0.9	1.8	0.9	1.2	0	134	254	120	89.5522
EE1DCD2EDA	YK1045	77410_2	77669_1	M	HIGH FAT	2021-12-06	4	8	40011	18212	21799	5493	5360.67	132.333	0.18872	0.754838	0.0665128	0.842641	0.122207	-0.0878031	775.212	176.32	69	67	1.9	84	18150	62	82	61	39	0	1.9	11.2	16.4	13	5.3	1.2	1.2	2.4	1.4	1.2	3	152	412	260	171.053
EE1DCD2EDB	YK1078	78052_2	78419_1	F	HIGH FAT	2021-12-30	1	11	67195	25896	41299	9131.5	8605.33	526.167	0.170209	0.748325	0.0786667	0.816792	0.0915427	-0.0684664	459.852	137.061	48	51	0.866667	85	14910	55	63	66	57	0	1.8	5.7	4.9	6.6	2.2	0.7	0.7	1.4	0.9	1.1	0	93	221	128	137.634
EE1DCD2EDC	YK1051	78118_2	78076_1	M	LOW FAT	2021-12-13	4	11	34725	15694	19031	5409.5	4007.67	1401.83	0.0817829	0.848243	0.0432231	0.855289	0.0385598	-0.00704636	303.442	111.466	45	45	1.9	103	16582.5	50	65	53	29	0	1.9	7.4	4.3	3.3	2.3	0.8	0.8	1.6	0.9	1	0	120	282	162	135
EE1DCD2EDD	YK1091	78420_2	78052_1	M	HIGH FAT	2022-01-04	3	12	44164	16844	27320	6636	5203.67	1432.33	0.153472	0.787093	0.0397115	0.88266	0.113761	-0.0955677	1237.77	208.675	61	48	1.7	114	18352.5	73	100	66	56	0	1.8	9.7	8.1	10.2	4	1.1	1	2.1	1	1.6	2	126	375	249	197.619
EE1DCD2EDE	YK1071	78071_2	78170_1	M	HIGH FAT	2021-12-25	4	12	NA	NA	NA	NA	NA	NA	0.122526	0.826314	0.0556831	0.930656	0.0668425	-0.104342	547.498	161.271	82	56	1.2	94	16200	89	73	54	47	0	2.1	9.5	7.8	7.8	3.1	1.3	1.3	2.6	1.3	1.3	3	139	378	239	171.942
EE1DCD2EDF	YK1025	77375_2	77449_1	M	HIGH FAT	2021-11-27	7	8	46878	22198	24680	6022	5916.67	105.333	0.168186	0.778587	0.0537436	0.852462	0.114442	-0.073875	961.594	209.833	89	72	1.1	76	19882.5	49	67	62	47	0	2.2	10.3	18	11.6	5.2	1.3	1.2	2.5	1.2	0.9	0	147	457	310	210.884
EE1DCD2EE0	YK1018	78172_2	78063_1	F	HIGH FAT	2021-11-21	3	9	71048	31995	39053	8903	9710	-807	0.152202	0.772371	0.0568475	0.84938	0.0953546	-0.0770092	474.909	95.2603	87	75	0.533333	83	18517.5	78	51	53	31	80	2	8.3	8	10.3	3.8	NA	1.5	NA	0.9	0.6	0	147	300	153	104.082
EE1DCD2EE1	YK1059	78154_2	78051_1	M	HIGH FAT	2021-12-18	4	6	41622	16595	25027	5588.5	5874.33	-285.833	0.101188	0.83883	0.0570133	0.856853	0.0441746	-0.0180235	433.863	194.473	63	63	1.1	103	18975	65	54	87	66	0	2	9.7	7.5	7	3.1	1.2	1.1	2.3	1.1	0.9	0	144	400	256	177.778
EE1DCD2EE2	YK1055	78109_2	78085_1	M	LOW FAT	2021-12-14	4	12	52981	16947	36034	7423.5	7025.33	398.167	0.0998347	0.836685	0.0481566	0.852955	0.0516781	-0.0162695	470.11	169.755	96	97	NA	91	19192.5	112	113	113	56	0	2	11.2	8.6	3.6	3.9	1.3	1.2	2.5	1.1	1.3	0	134	397	263	196.269
EE1DCD2EE3	YK1085	78184_2	78146_1	M	HIGH FAT	2022-01-03	5	15	57404	17074	40330	8695.5	7252.67	1442.83	0.0981175	0.836896	0.0498131	0.857134	0.0483045	-0.0202377	568.23	231.242	89	76	0.9	95	21375	60	68	80	51	0	2	10.3	6	6.3	2.8	1.3	1.3	2.6	1.2	1.6	0	126	389	263	208.73
EE1DCD2EE4	YK1031	78421_2	78120_1	M	LOW FAT	2021-11-30	1	11	44613	15965	28648	7034	4632	2402	0.155513	0.788624	0.0538889	0.856265	0.101624	-0.0676417	1019.59	257.315	87	73	2.4	89	17295	121	140	110	96	0	2	13.2	13.8	10.2	4	1.2	1.3	2.5	1.2	1.5	1	132	436	304	230.303
EE1DCD2EE5	YK1007	78054_2	78031_1	M	LOW FAT	2021-11-14	3	7	44936	18921	26015	6788	5875.67	912.333	0.129096	0.811117	0.0483333	0.865599	0.0807624	-0.0544819	684.591	175.261	113	96	1.1	98	15757.5	69	71	46	26	0	1.8	10.9	7	8.8	3.3	1	1	2	1.3	1.5	0	151	399	248	164.238
EE1DCD2EE6	YK1024	77457_2	77475_1	F	LOW FAT	2021-11-27	8	9	45792	18816	26976	5953.5	5711.33	242.167	0.0943647	0.822676	0.0573713	0.841518	0.0369934	-0.018842	198.205	77.2414	59	67	NA	87	13230	89	74	98	55	0	2	6.1	2.6	5.1	1.4	NA	1.3	NA	0.9	1.2	0	132	238	106	80.303
EE1DCD2EE7	YK1049	78418_2	78133_1	M	HIGH FAT	2021-12-13	2	7	38901	10472	28429	5883	4651	1232	0.185324	0.764712	0.0545345	0.856126	0.13079	-0.0914138	1017.46	193.718	76	60	3.5	93	17887.5	95	65	57	44	0	1.9	9.7	11.8	8.3	4.9	1.1	1.2	2.3	1.2	1.4	0	112	391	279	249.107
EE1DCD2EE8	YK1070	77475_2	77486_1	F	LOW FAT	2021-12-23	9	9	69940	25108	44832	9045.5	9904.67	-859.167	0.10895	0.803362	0.0635632	0.854751	0.0453871	-0.0513893	362.99	153.875	79	84	0.8	91	14887.5	87	63	74	33	0	1.8	8.9	3.8	6.8	2.6	0.9	0.9	1.8	0.9	1.5	3	102	272	170	166.667
EE1DCD2EE9	YK1081	78267_2	78417_1	M	LOW FAT	2021-12-31	1	4	39531	14407	25124	5720.5	4966.33	754.167	0.122099	0.816111	0.0567054	0.868411	0.0653933	-0.0522997	846.411	313.064	112	115	1.3	94	15495	60	136	58	37	0	2.2	11.8	10.8	6	3.9	1.3	1.3	2.6	1.3	2	0	118	405	287	243.22
EE1DCD2EEA	YK1066	78047_2	78421_1	F	HIGH FAT	2021-12-19	1	11	55430	23118	32312	7274.5	7790.67	-516.167	0.0756262	0.841927	0.0358238	0.871801	0.0398024	-0.029874	319.786	92.0366	50	56	0.3	93	22245	61	31	59	46	0	1.9	5.1	1.6	1.9	0.8	0.7	0.7	1.4	0.7	0.8	0	98	198	100	102.041
EE1DCD2EEB	YK1054	78151_2	78416_1	F	HIGH FAT	2021-12-13	2	12	57192	22432	34760	8067.5	7105	962.5	0.132435	0.798594	0.0841584	0.811386	0.0482764	-0.0127919	258.353	124.133	73	63	NA	91	18772.5	51	75	79	57	0	1.8	7.1	3.9	7	2.5	0.9	0.8	1.7	1	1.2	0	101	254	153	151.485
EE1DCD2EED	YK1015	78203_2	78107_1	M	LOW FAT	2021-11-21	3	8	NA	NA	NA	NA	NA	NA	0.150958	0.7862	0.0468229	0.881589	0.104135	-0.0953887	925.139	183.564	122	86	1.7	99	21232.5	168	210	111	59	150	1.9	10.9	10.5	6.6	5.2	1.1	1.2	2.3	1.5	1.3	2	149	412	263	176.51
EE1DCD2EEE	YK1063	78104_2	78069_1	M	LOW FAT	2021-12-19	4	11	48970	20781	28189	7262	6688	574	0.113065	0.830671	0.0360436	0.880156	0.0770214	-0.049485	846.932	184.897	93	90	1.8	104	15112.5	78	142	52	41	0	2	9.7	6.2	5.4	2.9	1.1	1.2	2.3	1.4	1.6	0	125	347	222	177.6
EE1DCD2EEF	YK1074	78036_2	78108_1	F	LOW FAT	2021-12-25	3	13	61646	20242	41404	7043.5	8369.67	-1326.17	0.0340923	0.871101	0.0566038	0.986164	-0.0225115	-0.115062	27.2778	86.6645	79	90	0.1	81	15540	65	61	85	41	0	2	6	1.3	2.4	1	0.8	0.8	1.6	1	1.1	0	118	247	129	109.322
EE1DCD2EF0	YK999	78415_2	78062_1	M	HIGH FAT	2021-11-13	1	10	47287	18655	28632	6539	6300	239	0.174221	0.772678	0.0676923	0.847923	0.106528	-0.0752452	725.568	192.304	89	77	2.5	89	16732.5	88	54	70	33	0	1.7	10.9	14.2	11.8	4.7	1.4	1.3	2.7	1.9	1.8	2	150	440	290	193.333
EE1DCD2EF1	YK1008	78054_2	78031_1	F	HIGH FAT	2021-11-14	3	7	NA	NA	NA	NA	NA	NA	0.119167	0.799414	0.0402976	0.868869	0.078869	-0.069455	575.923	110.3	67	56	0.4	87	14482.5	73	52	57	43	0	1.8	6.3	4.5	5.6	2.7	0.8	0.8	1.6	1.4	1.4	0	127	269	142	111.811
EE1DCD2EF2	YK1038	78030_2	78109_1	F	LOW FAT	2021-12-05	3	12	NA	NA	NA	NA	NA	NA	0.122063	0.792691	0.0558951	0.858488	0.0661677	-0.0657971	350.911	90.6561	76	78	0.466667	95	17505	66	107	54	28	0	2	6.9	4.6	5.5	3.1	1	0.9	1.9	0.8	1.3	0	123	244	121	98.374
EE1DCD2EF3	YK1089	78186_2	78036_1	M	LOW FAT	2022-01-03	5	13	37123	11665	25458	6026	4320.33	1705.67	0.122717	0.815567	0.0573611	0.865486	0.0653562	-0.0499196	575.242	197.42	85	74	0.5	80	15637.5	57	73	67	35	0	2	7.9	6.1	5.2	2	1	1	2	1	0.7	0	116	325	209	180.172
EE1DCD2EF4	YK1122	78077_2	78049_1	M	LOW FAT	2022-01-26	1	11	39776	16787	22989	6163.5	4672	1491.5	0.14569	0.778146	0.0542754	0.843804	0.091415	-0.0656584	886.182	238.804	97	100	1.7	82	17295	159	140	66	46	0	2.1	9.4	7.6	5.7	3.6	1.3	1.2	2.5	1.2	1.5	1	118	358	240	203.39
EE1DCD2EF5	YK1149	78688_2	78692_1	F	HIGH FAT	2022-02-06	2	4	58707	23701	35006	8669	7649	1020	0.107267	0.807314	0.0456	0.855433	0.061667	-0.048119	396.345	99.131	74	72	0.366667	89	19755	64	52	64	52	0	2	6.1	2	4.8	1.6	0.7	0.8	1.5	1	1.4	0	105	229	124	118.095
EE1DCD2EF6	YK1116	78087_2	78186_1	M	LOW FAT	2022-01-19	5	9	44889	12690	32199	6304	5575	729	0.128886	0.809219	0.0394444	0.872953	0.0894417	-0.0637346	1049.37	226.073	103	81	1.7	89	20317.5	81	123	57	29	0	1.9	12	7.5	6.1	3.7	1.5	1.5	3	1.2	1.2	0	132	420	288	218.182
EE1DCD2EF7	YK1101	78120_2	78105_1	F	HIGH FAT	2022-01-11	5	2	59287	26518	32769	8287	7926.67	360.333	0.119595	0.796032	0.0577037	0.852667	0.0618914	-0.0566343	468.806	156.216	69	71	0.333333	113	16740	76	50	65	38	0	1.3	6.6	3.4	7.6	2.8	0.8	0.8	1.6	0.9	1.6	0	107	268	161	150.467
EE1DCD2EF8	YK1139	78797_2	78906_1	F	LOW FAT	2022-01-31	1	8	47317	18571	28746	6394	6012.33	381.667	0.0850312	0.821916	0.0708176	0.836918	0.0142135	-0.0150024	142.407	98.2678	78	95	0.266667	88	16245	70	56	57	33	0	2	6.7	3.3	3.9	1.4	0.9	0.9	1.8	0.9	1.1	0	115	229	114	99.1304
EE1DCD2EF9	YK1115	78055_2	78078_1	F	HIGH FAT	2022-01-17	5	9	53404	21429	31975	8165.5	6761	1404.5	0.153851	0.775858	0.069127	0.830833	0.0847241	-0.0549757	445.809	129.011	39	32	0.5	88	17055	51	68	62	46	0	1.7	5.4	3.7	5.7	1.6	0.7	0.7	1.4	0.6	0.7	1	96	239	143	148.958
EE1DCD2EFA	YK1186	79036_2	78703_1	M	HIGH FAT	2022-02-28	2	6	47968	21374	26594	7369.5	5356	2013.5	0.17323	0.770713	0.0692982	0.848012	0.103932	-0.0772991	823.165	235.635	81	68	2.5	108	22342.5	85	106	54	42	0	1.8	12	11.4	12.3	5	1.4	1.3	2.7	1.3	1.1	3	132	446	314	237.879
EE1DCD2EFB	YK1095	78080_2	78111_1	F	LOW FAT	2022-01-08	5	8	42434	16820	25614	6054.5	4822.33	1232.17	0.0841212	0.844606	0.0710802	0.836451	0.013041	0.00815544	141.077	105.69	71	69	NA	99	18172.5	NA	NA	NA	NA	NA	1.9	6.8	2.8	5.2	1.4	0.9	0.8	1.7	0.8	1	0	117	238	121	103.419
EE1DCD2EFC	YK1190	78740_2	78728_1	M	HIGH FAT	2022-03-06	3	13	36284	15297	20987	5337	4700	637	0.219179	0.723903	0.0540896	0.871036	0.16509	-0.147134	1255.26	177.959	75	76	1.6	104	20790	67	69	61	40	0	2	10.7	19.2	10.1	5.5	1.2	1.1	2.3	1.1	1.2	2	140	423	283	202.143
EE1DCD2EFD	YK1098	78133_2	78106_1	M	LOW FAT	2022-01-10	5	9	34037	10941	23096	5304.5	3844.67	1459.83	0.0926156	0.849936	0.0427419	0.866559	0.0498737	-0.0166229	630.44	230.63	109	93	1.5	101	14467.5	76	187	49	32	0	2.2	13.3	9.2	7.5	4.2	1.4	1.4	2.8	1.3	1	0	149	454	305	204.698
EE1DCD2EFE	YK1138	78797_2	78906_1	M	HIGH FAT	2022-01-31	1	8	27517	10546	16971	4261	3240	1021	0.158985	0.777842	0.0614722	0.856583	0.0975126	-0.0787416	798.735	215.556	74	59	1.8	93	17677.5	61	65	56	53	0	2.1	10.2	11.2	9.9	4.7	1.3	1.3	2.6	1.2	1.7	0	137	422	285	208.029
EE1DCD2EFF	YK1108	78788_2	78708_1	M	HIGH FAT	2022-01-15	1	11	34918	13080	21838	4893.5	4346.67	546.833	0.166279	0.773394	0.0418346	0.87292	0.124445	-0.0995258	1252.63	201.51	99	82	1.8	98	22807.5	67	85	62	39	0	2	12.2	15.3	13	6.4	1.4	1.4	2.8	1.3	1.4	2	150	455	305	203.333
EE1DCD2F00	YK1174	78735_2	78727_1	M	LOW FAT	2022-02-20	2	9	44635	14448	30187	6667.5	5886.33	781.167	0.10294	0.832999	0.0563585	0.854174	0.0465815	-0.0211747	420.328	177.812	113	91	0.8	89	14842.5	107	176	87	58	0	2	10.8	5.9	1.2	NA	5.9	1.2	7.1	4.7	NA	0	142	358	216	152.113
EE1DCD2F01	YK1160	78711_2	78797_1	M	LOW FAT	2022-02-13	2	11	43421	17947	25474	6653	4829	1824	0.183975	0.750967	0.050712	0.869773	0.133263	-0.118806	1125.72	191.714	88	87	0.95	99	20707.5	153	200	81	58	0	2	10.8	9	6	3.6	1.1	1.1	2.2	1.2	1.5	0	123	362	239	194.309
EE1DCD2F02	YK1184	78705_2	78744_1	M	LOW FAT	2022-02-28	3	9	46266	16845	29421	6459	5723.67	735.333	0.0755411	0.858294	0.0453145	0.866698	0.0302267	-0.00840374	505.482	259.686	111	91	0.8	70	16807.5	48	129	120	75	0	2.2	10.9	6.1	4.5	2.3	1.4	1.4	2.8	1.2	1.4	2	128	429	301	235.156
EE1DCD2F03	YK1109	78788_2	78708_1	F	LOW FAT	2022-01-15	1	11	54236	25895	28341	6977	7275.67	-298.667	0.101841	0.815507	0.0585802	0.852037	0.0432603	-0.0365298	270.232	103.833	85	80	0.333333	81	15322.5	52	66	60	28	0	1.8	7.1	3	5.2	2.3	0.9	0.8	1.7	1	1.3	1	122	249	127	104.098
EE1DCD2F04	YK1150	78828_2	79038_1	M	LOW FAT	2022-02-06	1	12	41957	15354	26603	5777.5	5217	560.5	0.134593	0.812002	0.0553448	0.860977	0.0792486	-0.0489752	681.983	203.261	112	100	1.4	92	14857.5	NA	NA	NA	NA	NA	2	9.6	11.7	6.6	3.6	1.1	1.2	2.3	1.3	1.6	1	145	401	256	176.552
EE1DCD2F06	YK1114	78055_2	78078_1	M	LOW FAT	2022-01-17	5	9	41587	13307	28280	5769.5	5590.67	178.833	0.125536	0.810351	0.0530449	0.86	0.0724912	-0.0496491	678.248	209.861	87	66	NA	93	16357.5	79	172	54	33	0	2	9.1	6.7	5.2	4.7	1.2	1.1	2.3	1.1	1.4	1	120	361	241	200.833
EE1DCD2F07	YK1154	78771_2	78700_1	M	HIGH FAT	2022-02-12	2	9	57006	27350	29656	14817	4064	10753	0.290883	0.65902	0.0708216	0.848638	0.220062	-0.189618	1198.71	145.547	77	55	1.1	111	22830	89	180	58	49	0	2	11.9	27.7	13.7	7.9	1.3	1.3	2.6	1.5	0.9	3	165	460	295	178.788
EE1DCD2F08	YK1176	78076_2	78184_1	M	LOW FAT	2022-02-22	5	11	38932	11892	27040	6083.5	4688	1395.5	0.198415	0.744692	0.0525	0.86429	0.145915	-0.119598	1394.24	240.66	124	129	1.7	99	15615	283	464	76	54	0	1.9	15.5	18.5	1.8	NA	NA	1.7	NA	10.1	NA	2	129	459	330	255.814
EE1DCD2F09	YK1185	78705_2	78744_1	F	HIGH FAT	2022-02-28	3	9	72884	27756	45128	11777	8065.33	3711.67	0.0931515	0.816455	0.0553114	0.931062	0.0378402	-0.114608	307.152	111.999	74	70	0.4	74	17092.5	57	97	65	31	0	1.9	7.3	8.9	8.9	2.2	0.9	1	1.9	0.9	1.1	0	113	249	136	120.354
EE1DCD2F0A	YK1128	79012_2	78769_1	M	LOW FAT	2022-01-27	1	9	32783	11975	20808	5566.5	3638	1928.5	0.156938	0.781977	0.0633333	0.846151	0.0936047	-0.0641745	778.785	227.742	116	118	1.7	76	15600	102	136	58	43	0	2.2	9.4	8.3	7.3	4.8	1.3	1.2	2.5	1.2	1.5	0	119	367	248	208.403
EE1DCD2F0B	YK1152	78706_2	79012_1	M	LOW FAT	2022-02-06	1	10	48030	18249	29781	6359.5	6856.33	-496.833	0.127943	0.815448	0.0706133	0.844853	0.0573295	-0.0294057	407.326	170.254	102	95	1.8	106	15697.5	115	203	51	35	0	2	11.1	8.6	5.3	2.6	1.3	1.2	2.5	1.3	1.4	0	144	385	241	167.361
EE1DCD2F0C	YK1135	78772_2	79036_1	F	HIGH FAT	2022-01-30	1	11	62242	24903	37339	8962	8030.67	931.333	0.166036	0.756667	0.0746429	0.817054	0.0913928	-0.0603869	382.616	100.929	72	71	0.4	98	21705	55	53	60	42	0	1.9	7.4	4.6	9.4	2.1	1	0.9	1.9	1	1.5	0	122	258	136	111.475
EE1DCD2F0D	YK1119	78417_2	78181_1	F	LOW FAT	2022-01-24	2	5	39025	17165	21860	4742	5487	-745	0.124329	0.782383	0.0713667	0.8485	0.0529621	-0.0661169	285.007	103.779	81	82	0.3	74	12270	61	68	67	39	0	1.8	7.4	3.5	6.6	2.3	0.8	0.8	1.6	1	1.5	0	113	243	130	115.044
EE1DCD2F0E	YK1163	78799_2	78774_1	F	LOW FAT	2022-02-13	2	12	69183	29079	40104	10237	8905	1332	0.0618165	0.842285	0.0553271	0.732804	0.00648938	0.109481	85.8671	91.2086	66	74	0.1	88	14227.5	66	47	72	44	0	1.8	5.3	1.7	2.4	1.2	0.7	0.7	1.4	0.9	1	0	102	203	101	99.0196
EE1DCD2F0F	YK1188	78768_2	78765_1	M	HIGH FAT	2022-02-28	3	14	35866	16065	19801	5153	4617.67	535.333	0.139559	0.79888	0.0475421	0.86633	0.0920171	-0.0674503	976.346	238.119	80	70	1.7	89	18862.5	73	139	50	50	0	1.8	10.8	9.7	7.7	3.1	1.4	1.4	2.8	1.2	1.6	2	119	388	269	226.05
EE1DCD2F10	YK1165	78692_2	78799_1	F	LOW FAT	2022-02-14	2	2	65795	29999	35796	9212	8233.67	978.333	0.068303	0.847121	0.0577656	1.02784	0.0105375	-0.180718	185.859	99.2516	80	87	0.266667	87	17175	55	52	63	34	0	1.8	7.4	1.8	4.9	2	0.9	0.9	1.8	0.9	1.1	0	120	243	123	102.5
EE1DCD2F11	YK1121	78146_2	78038_1	F	LOW FAT	2022-01-25	1	13	64435	27114	37321	8303	8596.67	-293.667	0.0245994	0.885016	0.0358951	0.871512	-0.0112957	0.0135037	31.9862	95.5767	77	95	NA	75	13732.5	42	58	90	26	0	1.8	6.1	0.3	1.2	1	0.9	0.8	1.7	0.9	1	0	121	242	121	100
EE1DCD2F12	YK1100	78120_2	78105_1	M	LOW FAT	2022-01-11	5	2	38160	13937	24223	5908.5	4582.67	1325.83	0.090176	0.839541	0.060814	0.822984	0.029362	0.0165561	487.954	304.488	110	102	1	82	14310	106	160	63	38	0	1.8	10.6	6.4	5.1	2.8	1.1	1.2	2.3	1.4	1.3	0	106	369	263	248.113
EE1DCD2F13	YK1146	78806_2	78810_1	M	LOW FAT	2022-02-06	2	8	40423	14535	25888	5580.5	4714	866.5	0.0712929	0.868283	0.0783469	0.83832	-0.00705395	0.029963	144.137	177.882	100	95	1.5	92	13837.5	79	105	65	41	0	2	9.8	6	4.7	2.6	1	1	2	1	0.6	0	138	331	193	139.855
EE1DCD2F14	YK1161	78711_2	78797_1	F	HIGH FAT	2022-02-13	2	11	58376	20290	38086	8355	7867	488	0.1944	0.735187	0.0602041	0.851769	0.134196	-0.116582	723.729	120.186	73	57	1.1	84	20430	65	66	68	72	0	1.8	7.3	6.1	8	2.6	0.8	0.8	1.6	0.5	0.8	0	127	272	145	114.173
EE1DCD2F15	YK1172	78689_2	78853_1	M	LOW FAT	2022-02-19	2	10	41338	15578	25760	5523.5	4981.67	541.833	0.139552	0.787811	0.071224	0.851875	0.0683283	-0.0640641	412.797	142.037	100	80	1.5	83	18885	84	175	59	37	0	2.1	9.8	8.5	1.2	NA	8.5	1.3	9.8	6.3	NA	0	147	349	202	137.415
EE1DCD2F16	YK1175	78735_2	78727_1	F	HIGH FAT	2022-02-20	2	9	50877	19677	31200	8411.5	6416.67	1994.83	0.0432895	0.881287	0.0360856	0.872355	0.00720385	0.00893181	150.932	111.316	66	72	0.233333	82	15442.5	83	51	60	65	230	1.8	7	1.1	0.8	NA	0.8	0.8	1.6	3.1	NA	0	122	249	127	104.098
EE1DCD2F17	YK1124	79038_2	78807_1	M	LOW FAT	2022-01-26	1	10	40642	14208	26434	6336	4579.33	1756.67	0.11659	0.818559	0.0589259	0.858037	0.057664	-0.0394778	759.585	314.456	107	100	0.4	102	16290	108	131	160	94	0	2	13.7	7.8	8.3	5.2	1.2	1.2	2.4	1.3	1.9	3	117	422	305	260.684
EE1DCD2F18	YK1130	78734_2	78712_1	M	HIGH FAT	2022-01-30	2	12	42234	17895	24339	6072	5707.33	364.667	0.135747	0.798898	0.0493651	0.853206	0.086382	-0.0543079	811.383	210.333	64	59	0.9	90	15967.5	73	44	68	38	0	2	8.3	8.2	8.4	3.9	1.1	1.1	2.2	1.2	1.4	0	120	363	243	202.5
EE1DCD2F19	YK1096	78124_2	78047_1	M	HIGH FAT	2022-01-10	5	10	38544	14109	24435	5743	4450.33	1292.67	0.19143	0.751457	0.0796199	0.837778	0.11181	-0.0863211	686.669	193.48	88	67	1.4	91	12667.5	113	92	119	101	0	2	11.3	11.1	9.7	4.7	1.3	1.3	2.6	1.1	1.5	0	134	397	263	196.269
EE1DCD2F1A	YK1158	78764_2	78688_1	M	LOW FAT	2022-02-13	2	10	NA	NA	NA	NA	NA	NA	0.126823	0.799107	0.0701067	0.843307	0.0567165	-0.0441999	423.887	174.421	97	81	0.9	95	19327.5	63	83	59	51	0	2	10.4	8.2	5.7	3.6	1.1	1.2	2.3	1	1.4	0	144	380	236	163.889
EE1DCD2F1B	YK1117	78087_2	78186_1	F	HIGH FAT	2022-01-19	5	9	47281	17965	29316	7224	5553.33	1670.67	0.127937	0.792111	0.0706944	0.83684	0.0572421	-0.0447292	295.874	107.058	54	55	0.2	75	17842.5	59	65	63	32	0	1.9	5.7	3.2	4.1	1	0.8	0.8	1.6	1	1.1	1	107	241	134	125.234
EE1DCD2F1C	YK1097	78124_2	78047_1	F	LOW FAT	2022-01-10	5	10	53025	22912	30113	6655.5	7099	-443.5	0.0756619	0.830383	0.055102	0.839796	0.0205598	-0.00941314	192.84	110.875	83	82	NA	81	13792.5	108	69	159	52	0	1.9	5.4	2.6	3.5	1.5	0.8	0.8	1.6	0.8	0.9	0	111	233	122	109.91
EE1DCD2F1D	YK1126	78421_2	78120_1	M	LOW FAT	2022-01-26	3	13	43209	10935	32274	6462.5	5452	1010.5	0.167131	0.775387	0.0481685	0.872674	0.118963	-0.0972869	1459.47	299.345	115	93	1.4	80	15900	121	259	82	44	0	2	14.4	13.9	12.2	4.5	1.4	1.3	2.7	1.3	1.7	0	115	422	307	266.957
EE1DCD2F1E	YK1106	78738_2	78785_1	M	HIGH FAT	2022-01-15	1	13	45543	20727	24816	5516	5983.33	-467.333	0.173704	0.772377	0.0461905	0.869272	0.127513	-0.0968944	1122.98	188.96	83	65	1.2	104	24292.5	112	121	80	53	0	1.8	10.6	10.8	8	4.8	1.1	1.1	2.2	1.4	0.8	2	137	401	264	192.701
EE1DCD2F1F	YK1164	78692_2	78799_1	M	HIGH FAT	2022-02-14	2	2	42818	15789	27029	6147	5283.33	863.667	0.178892	0.754254	0.0426562	0.87849	0.136235	-0.124236	1181.07	162.27	104	86	1.7	109	20730	95	67	63	59	0	2	11.3	15	8.5	4.7	1.3	1.3	2.6	1.5	1.4	3	150	420	270	180
EE1DCD2F20	YK1151	78828_2	79038_1	F	HIGH FAT	2022-02-06	1	12	55900	24957	30943	7387	7232.33	154.667	0.0916457	0.825844	0.0428205	0.86707	0.0488252	-0.0412258	462.104	150.15	67	67	0.433333	96	16515	50	NA	65	52	0	2	6.6	3.2	5.5	2.7	0.9	0.7	1.6	0.9	1.2	0	99	253	154	155.556
EE1DCD2F21	YK1104	78171_2	78418_1	M	LOW FAT	2022-01-13	2	14	44320	17123	27197	6146.5	5844.67	301.833	0.0717808	0.864511	0.050386	0.859684	0.0213949	0.0048272	447.354	286.368	123	114	0.7	89	14617.5	80	90	60	36	0	2	10.2	5	4.6	2.4	1.2	1.3	2.5	1.2	1	0	114	393	279	244.737
EE1DCD2F22	YK1179	78766_2	78786_1	F	LOW FAT	2022-02-26	3	12	54949	27640	27309	6890	7277.67	-387.667	0.0740571	0.844362	0.0486879	0.86195	0.0253692	-0.0175884	183.176	82.3713	49	54	0.3	71	18225	67	67	72	37	0	1.9	4.4	1.7	2.6	1.1	0.6	0.7	1.3	0.7	0.7	0	103	199	96	93.2039
EE1DCD2F23	YK1103	78061_2	78147_1	F	HIGH FAT	2022-01-11	5	8	58775	15722	43053	8488	7526.33	961.667	0.213243	0.716304	0.0819365	0.835746	0.131306	-0.119443	537.001	109.781	76	58	NA	112	18277.5	122	105	184	77	0	1.8	8.4	5.6	11.4	4.4	1	1	2	1	1.4	0	117	276	159	135.897
EE1DCD2F24	YK1178	78766_2	78786_1	M	HIGH FAT	2022-02-26	3	12	39015	17214	21801	5292.5	4887	405.5	0.19613	0.743476	0.0556695	0.886724	0.140461	-0.143247	1023.18	167.302	62	50	1.7	82	20085	106	213	57	48	0	1.9	9.5	9.2	8.4	7.1	1.2	1.1	2.3	1.4	1.2	3	138	391	253	183.333
EE1DCD2F25	YK1189	78768_2	78765_1	F	LOW FAT	2022-02-28	3	14	52029	22226	29803	6288.5	6700.33	-411.833	0.0606697	0.85312	0.0490278	0.85691	0.0116419	-0.00378948	182.295	127.116	67	77	0.466667	65	14910	75	63	61	30	0	1.8	6.2	1.8	3.2	1.6	0.8	0.8	1.6	0.8	0.7	0	113	247	134	118.584
EE1DCD2F26	YK1144	78780_2	78829_1	M	HIGH FAT	2022-02-05	2	14	31231	10915	20316	4717	3583.67	1133.33	0.151193	0.784773	0.0568056	0.860222	0.0943876	-0.0754495	680.733	167.605	86	60	2.4	99	15885	94	65	54	58	0	2	9.5	8.3	7.9	4.7	1.1	1.1	2.2	1.3	2.1	0	137	376	239	174.453
EE1DCD2F27	YK1145	78780_2	78829_1	F	LOW FAT	2022-02-05	2	14	39379	17657	21722	5553.5	4885.67	667.833	0.0675421	0.839125	0.0569579	0.846926	0.0105842	-0.00780099	127.955	90.4624	65	66	0.233333	81	14497.5	60	46	68	38	0	1.8	6	1.8	2.4	2.4	0.7	0.7	1.4	0.9	0.8	0	113	221	108	95.5752
EE1DCD2F28	YK1131	78734_2	78712_1	F	LOW FAT	2022-01-30	2	12	NA	NA	NA	NA	NA	NA	NA	NA	0.0168313	0.886626	NA	NA	NA	NA	NA	NA	NA	NA	NA	NA	NA	NA	NA	NA	NA	NA	NA	NA	NA	NA	NA	NA	NA	NA	0	89	NA	NA	NA
EE1DCD2F29	YK1168	78810_2	78698_1	M	HIGH FAT	2022-02-19	2	9	30910	9871	21039	4232.5	3876	356.5	0.202639	0.745004	0.0662438	0.847935	0.136395	-0.102931	874.765	179.975	90	78	3	107	18810	72	152	50	44	0	1.9	14.1	19.2	1.4	NA	1.4	1.4	2.8	12.3	NA	3	158	452	294	186.076
EE1DCD2F2A	YK1193	78765_2	78699_1	F	LOW FAT	2022-03-06	3	14	57718	20672	37046	8714.5	8184.67	529.833	0.0741298	0.840339	0.0329043	0.865743	0.0412255	-0.0254033	404.112	117.197	83	92	0.266667	77	15705	101	58	63	28	0	1.9	7.1	2.7	4.5	1.9	0.9	0.9	1.8	1	1.3	1	110	247	137	124.545
EE1DCD2F2B	YK1105	78171_2	78418_1	F	HIGH FAT	2022-01-13	2	14	65631	23884	41747	8378	9475.67	-1097.67	0.0806033	0.837813	0.0713858	0.834569	0.00921755	0.00324368	180.378	149.28	78	80	0.166667	96	20167.5	67	58	86	42	0	1.9	6.6	1.5	3	0.9	0.9	0.9	1.8	1.7	1.2	0	104	242	138	132.692
EE1DCD2F2C	YK1155	78771_2	78700_1	F	LOW FAT	2022-02-12	2	9	69352	26416	42936	9827	8931.33	895.667	0.116099	0.809505	0.0739031	0.83849	0.0421958	-0.0289849	207.479	88.9606	69	72	0.266667	81	16245	43	56	62	25	0	2	7.3	2.5	5	2.5	0.8	0.8	1.6	1	1.1	1	128	244	116	90.625
EE1DCD2F2D	YK1180	78796_2	78802_1	M	HIGH FAT	2022-02-26	3	12	44016	16871	27145	6601	5403.67	1197.33	0.124141	0.815507	0.0510377	0.842893	0.0731031	-0.0273858	638.879	193.904	81	76	1.6	83	17917.5	91	110	57	47	0	1.9	9.3	8.5	6.6	3.7	1.1	1	2.1	1.3	1.1	0	118	356	238	201.695
EE1DCD2F2E	YK1167	78971_2	78808_1	F	LOW FAT	2022-02-19	1	12	52779	21962	30817	7904.5	6700	1204.5	0.073481	0.824367	0.0633654	0.85516	0.0101156	-0.0307932	76.176	46.4525	54	61	0.266667	93	15330	69	74	53	27	0	1.7	5.1	2.1	0.7	NA	2.1	0.7	2.8	1.4	NA	0	113	184	71	62.8319
EE1DCD2F2F	YK1147	78806_2	78810_1	F	HIGH FAT	2022-02-06	2	8	49238	19558	29680	6866.5	5681.33	1185.17	0.0873773	0.823773	0.0704762	0.840667	0.0169011	-0.0168934	132.613	83.8488	44	45	NA	102	14790	NA	NA	NA	NA	NA	2.1	5.4	1.5	4.1	1.3	0.8	0.8	1.6	0.8	1.1	0	115	217	102	88.6957
EE1DCD2F30	YK1162	78799_2	78774_1	M	HIGH FAT	2022-02-13	2	12	43545	18074	25471	6287	5451.67	835.333	0.146729	0.794021	0.047055	0.86754	0.0996742	-0.073519	1029.23	231.447	89	54	0.5	99	16335	93	63	61	40	0	1.8	9.7	8.6	7.9	2.9	1	1	2	0.9	0.8	2	122	382	260	213.115
EE1DCD2F31	YK1123	78077_2	78049_1	F	HIGH FAT	2022-01-26	1	11	48559	23096	25463	6275	6471	-196	0.171759	0.759414	0.049031	0.859574	0.122728	-0.10016	710.593	104.433	38	60	NA	84	9382.5	108	82	101	76	280	1.8	5.6	6.6	5.7	2.2	NA	1.2	NA	0.7	1	0	103	228	125	121.359
EE1DCD2F32	YK1156	78856_2	78734_1	M	HIGH FAT	2022-02-13	2	12	47831	18512	29319	6919	6164.67	754.333	0.128263	0.814169	0.0546175	0.860219	0.0736455	-0.0460498	675.738	212.645	90	81	1.4	84	15990	66	59	86	71	0	1.9	8.9	12.4	6.4	4.2	1.2	1.2	2.4	1.3	0.6	0	145	433	288	198.621
EE1DCD2F33	YK1111	78785_2	78705_1	F	HIGH FAT	2022-01-15	1	12	58235	27858	30377	7814	7979	-165	0.100399	0.815272	0.0274194	0.860108	0.0729792	-0.0448358	986.667	181.304	42	39	0.55	103	16560	78	71	90	56	0	1.8	5.2	1.6	1.2	0.7	0.6	0.6	1.2	0.6	0.5	0	80	197	117	146.25
EE1DCD2F34	YK1127	78421_2	78120_1	F	HIGH FAT	2022-01-26	3	13	55303	19595	35708	8229	6855.67	1373.33	0.187333	0.740681	0.0480833	0.869458	0.13925	-0.128778	1068.8	155.566	53	40	0.533333	92	21855	79	80	62	32	0	1.8	7.9	6.4	7.3	3.2	0.8	0.7	1.5	1.1	0.6	0	98	258	160	163.265
EE1DCD2F35	YK1125	79038_2	78807_1	F	HIGH FAT	2022-01-26	1	10	47391	20901	26490	6111.5	6607	-495.5	0.1107	0.816783	0.0602532	0.851519	0.0504468	-0.0347357	365.126	142.837	58	62	NA	83	13680	NA	NA	NA	NA	NA	1.8	5.5	4.6	4.6	2.6	0.8	0.7	1.5	0.8	0.9	0	95	231	136	143.158
EE1DCD2F36	YK1153	78706_2	79012_1	F	HIGH FAT	2022-02-06	1	10	53230	21488	31742	6314.5	6804.67	-490.167	0.0920159	0.830968	0.082449	0.825646	0.00956689	0.005322	139.15	115.667	69	69	0.466667	100	16522.5	66	38	61	61	0	1.9	6.2	1.9	4.3	1.2	0.9	0.8	1.7	0.8	1.1	0	106	235	129	121.698
EE1DCD2F37	YK1171	78959_2	78788_1	F	HIGH FAT	2022-02-19	2	12	50331	19731	30600	6952	7095.33	-143.333	0.0685463	0.843612	0.0371698	0.872044	0.0313764	-0.0284317	294.924	107.169	50	55	0.233333	89	14685	55	100	68	40	0	1.9	6.9	1.5	1	NA	1	1	2	3.8	NA	0	121	265	144	119.008
EE1DCD2F38	YK1169	78810_2	78698_1	F	LOW FAT	2022-02-19	2	9	51758	19875	31883	7776.5	6683.67	1092.83	0.090919	0.825717	0.0940805	0.831466	-0.00316146	-0.00574901	78.2834	83.2072	50	59	0.3	84	14527.5	50	85	59	23	0	1.6	5.9	1.9	0.6	NA	1.9	0.6	2.5	4.3	NA	0	126	241	115	91.2698
EE1DCD2F39	YK1170	78959_2	78788_1	M	LOW FAT	2022-02-19	2	12	39009	16264	22745	5243	4806	437	0.0577778	0.865312	0.0343103	0.876782	0.0234674	-0.01147	435.678	213.942	111	86	1.1	92	13897.5	67	76	58	49	0	2	10.6	4	1.4	NA	4	1.4	5.4	4.6	NA	0	139	390	251	180.576
EE1DCD2F3A	YK1137	78727_2	79039_1	F	HIGH FAT	2022-01-30	1	8	61536	25526	36010	7432.5	9191	-1758.5	0.0386239	0.880046	0.0579646	0.864336	-0.0193407	0.0157096	28.5496	96.4267	64	80	NA	79	21525	71	62	101	52	0	1.9	6.2	1.7	2	1.2	0.9	0.8	1.7	1	1.3	0	124	250	126	101.613
EE1DCD2F3B	YK1183	79074_2	78689_1	F	HIGH FAT	2022-02-27	2	14	58146	25003	33143	7546	7382	164	0.0575309	0.852346	0.0423569	0.802054	0.015174	0.0502918	159.3	102.88	61	55	0.166667	74	15712.5	56	57	101	71	0	1.7	6.6	1.7	2.9	1.3	0.9	0.7	1.6	1.1	1.4	0	101	218	117	115.842
EE1DCD2F3C	YK1157	78856_2	78734_1	F	LOW FAT	2022-02-13	2	12	59961	21435	38526	8342	7660	682	0.0286782	0.869799	0.0414423	0.865737	-0.0127641	0.00406167	54.3697	124.124	91	105	0.233333	84	16335	51	36	66	36	0	1.9	6.8	1.5	2.8	1.6	0.9	0.9	1.8	1.2	1.2	0	119	258	139	116.807
EE1DCD2F3D	YK1120	78146_2	78038_1	M	HIGH FAT	2022-01-25	1	13	NA	NA	NA	NA	NA	NA	0.166099	0.762586	0.0574425	0.856293	0.108657	-0.0937069	1056.63	256.227	107	200	NA	NA	NA	NA	NA	NA	NA	NA	NA	NA	NA	NA	NA	NA	NA	NA	NA	NA	0	134	NA	NA	NA
EE1DCD2F3E	YK1099	78133_2	78106_1	F	HIGH FAT	2022-01-10	5	9	48919	16534	32385	6959	6268	691	0.100402	0.823764	0.0465723	0.855849	0.05383	-0.0320847	371.843	110.663	65	47	0.3	94	18195	43	53	64	44	0	1.8	6.4	2.5	4.6	1.3	0.9	0.8	1.7	1.1	1.2	0	119	245	126	105.882
EE1DCD2F3F	YK1133	78701_2	78999_1	F	LOW FAT	2022-01-30	1	10	NA	NA	NA	NA	NA	NA	NA	NA	0.0648822	0.83404	NA	NA	NA	NA	NA	NA	NA	NA	NA	NA	NA	NA	NA	NA	NA	NA	NA	NA	NA	NA	NA	NA	NA	NA	0	103	NA	NA	NA
EE1DCD2F40	YK1113	78147_2	78312_1	F	HIGH FAT	2022-01-16	5	6	66697	28559	38138	8704	8975.67	-271.667	0.0664065	0.85626	0.0448291	0.854872	0.0215774	0.00138837	289.323	163.247	71	63	0.15	109	15930	59	35	84	43	0	1.8	5.7	2.3	2.4	1.5	NA	1.3	NA	0.8	1.3	0	104	228	124	119.231
EE1DCD2F41	YK1192	78765_2	78699_1	M	HIGH FAT	2022-03-06	3	14	32040	13699	18341	4845.5	4085.67	759.833	0.123599	0.815879	0.0523416	0.858264	0.0712571	-0.0423855	684.526	215.824	96	77	0.9	101	15045	99	63	70	50	0	2	11.8	8.6	8.7	4.5	1.5	1.4	2.9	1.2	1.9	3	141	422	281	199.291
EE1DCD2F42	YK1181	78796_2	78802_1	F	LOW FAT	2022-02-26	3	12	50902	22191	28711	6545	6913.67	-368.667	0.0769129	0.823731	0.05337	0.854249	0.0235429	-0.030518	178.723	86.4971	45	70	0.766667	68	14692.5	82	81	66	23	0	1.8	6.3	2.7	3.5	1.7	0.8	0.8	1.6	0.8	0.7	0	99	210	111	112.121
EE1DCD2F43	YK1173	78689_2	78853_1	F	HIGH FAT	2022-02-19	2	10	53450	21566	31884	7402.5	7028.33	374.167	0.057648	0.852741	0.0555116	0.856898	0.00213642	-0.00415626	120.036	110.853	71	61	0.566667	75	16605	79	53	74	40	0	1.8	5.5	1.1	0.7	NA	0.7	0.7	1.4	2.5	NA	0	116	233	117	100.862
EE1DCD2F44	YK1112	78147_2	78312_1	M	LOW FAT	2022-01-16	5	6	56387	23997	32390	7672.5	7652	20.5	0.113527	0.814206	0.0668672	0.844386	0.0466602	-0.0301796	382.534	174.052	105	113	0.3	92	15675	78	85	90	36	0	2.1	12.3	7.5	5.7	5.6	NA	2.2	NA	1.2	1.5	1	155	416	261	168.387
EE1DCD2F45	YK1182	79074_2	78689_1	M	LOW FAT	2022-02-27	2	14	49904	22733	27171	7024	6354.67	669.333	0.0447444	0.889325	0.0428571	0.88631	0.00188723	0.00301563	203.889	192.062	102	96	1	86	15105	82	130	61	49	0	1.9	9.4	3.2	4.6	1.6	1.3	1.1	2.4	1.2	1.6	0	135	354	219	162.222
EE1DCD2F46	YK1141	78803_2	78775_1	F	LOW FAT	2022-02-01	2	13	53099	20850	32249	7413.5	7675	-261.5	0.0235105	0.889758	0.0469478	0.853735	-0.0234373	0.0360235	24.8931	159.921	80	101	NA	80	16057.5	51	50	75	25	190	1.9	6.3	1.7	1.6	0.9	0.8	0.8	1.6	0.9	0.6	0	93	231	138	148.387
EE1DCD2F47	YK1102	78061_2	78147_1	M	LOW FAT	2022-01-11	5	8	45683	14424	31259	7133	5238	1895	0.141941	0.791502	0.0680702	0.854912	0.0738712	-0.0634104	565.808	195.615	111	97	1.7	97	16095	98	119	67	35	0	2	12.4	10	7.1	3.3	1	1	2	1.2	0.9	0	134	387	253	188.806
EE1DCD2F48	YK1134	78772_2	79036_1	M	LOW FAT	2022-01-30	1	11	43364	14524	28840	6636	5285	1351	0.145135	0.787007	0.0664035	0.837339	0.0787316	-0.0503322	538.441	174.547	102	91	1	95	20295	93	150	57	30	0	2.1	12	7.6	5.9	2.6	1.2	1.2	2.4	1.1	1.3	3	129	359	230	178.295
EE1DCD2F49	YK1143	78807_2	78885_1	F	LOW FAT	2022-02-05	2	16	55682	23657	32025	7986	7509	477	0.0220833	0.892179	0.0362264	0.880881	-0.0141431	0.011299	19.6181	98.7434	71	79	0.166667	68	12817.5	78	59	68	34	0	1.9	6.1	1.6	1.3	0.7	0.8	0.8	1.6	0.9	0.7	0	120	231	111	92.5
EE1DCD2F4A	YK1148	78688_2	78692_1	M	LOW FAT	2022-02-06	2	4	42961	16033	26928	6057	5444.33	612.667	0.116534	0.809349	0.0531073	0.861328	0.0634269	-0.0519789	461.596	140.487	108	104	0.9	88	13597.5	51	51	60	49	0	2.1	9.6	5	3.9	2.4	1.1	1.2	2.3	1.5	0.8	0	139	362	223	160.432
EE1DCD2F4B	YK1094B	78080_2	78111_1	M	HIGH FAT	2022-01-08	5	8	44343	16357	27986	6064	5847.67	216.333	0.148131	0.790639	0.0727981	0.854866	0.075333	-0.064227	511.932	178.136	90	80	0.3	89	17182.5	73	59	97	60	0	1.9	10.3	11.4	10.4	5.2	1.4	1.4	2.8	1.3	1.7	0	161	438	277	172.05
EE1DCD2F4C	YK1132	78701_2	78999_1	M	HIGH FAT	2022-01-30	1	10	35395	12199	23196	5513.5	4098.67	1414.83	0.105912	0.828374	0.068087	0.837594	0.037825	-0.00922044	401.831	219.057	79	79	0.8	87	18435	55	46	67	36	0	2	10.2	9	8.1	4.3	1.1	1.2	2.3	1	1	0	130	393	263	202.308
EE1DCD2F4D	YK1129	79012_2	78769_1	F	HIGH FAT	2022-01-27	1	9	53855	24618	29237	7679	6895.33	783.667	0.102107	0.823939	0.0457752	0.860775	0.0563322	-0.0368358	527.688	169.353	82	71	0.533333	84	15097.5	70	69	57	54	0	1.9	7.9	2	3.4	1.9	0.9	0.8	1.7	1	1.1	0	98	265	167	170.408
EE1DCD2F4E	YK1159	78764_2	78688_1	F	HIGH FAT	2022-02-13	2	10	50238	22759	27479	7417	6475.67	941.333	0.0788752	0.845638	0.0478274	0.867321	0.0310478	-0.0216836	257.81	111.54	53	50	0.566667	109	18090	60	46	63	72	0	1.8	6.1	3.9	5	1.3	0.9	0.9	1.8	0.8	0.8	0	112	264	152	135.714
EE1DCD2F4F	YK1142	78807_2	78885_1	M	HIGH FAT	2022-02-05	2	16	39673	12798	26875	6194	4649.67	1544.33	0.211487	0.728864	0.0594398	0.866919	0.152047	-0.138054	1119.89	188.258	73	67	1.6	98	16447.5	112	80	77	62	0	1.9	11	15.5	14.5	7	1.1	1.2	2.3	1.2	1.3	0	143	425	282	197.203
EE1DCD2F50	YK1107	78738_2	78785_1	F	LOW FAT	2022-01-15	1	13	56587	25602	30985	7233	8293.67	-1060.67	0.030768	0.881951	0.0377381	0.883333	-0.00697005	-0.00138249	110.62	157.929	86	91	0.233333	80	18292.5	50	52	64	30	0	1.8	5.4	1	2.3	1.2	0.9	0.8	1.7	0.9	1.1	1	97	234	137	141.237
EE1DCD2F51	YK1118	78267_2	78417_1	M	HIGH FAT	2022-01-24	2	16	47957	14377	33580	7084.5	6741.67	342.833	0.102261	0.834879	0.0485507	0.858406	0.0537101	-0.0235267	625.746	235.122	66	70	NA	103	13605	110	104	104	62	0	1.9	8.4	5.2	4.1	2.1	1.2	1.2	2.4	1.2	1.6	0	109	345	236	216.514
EE1DCD2F52	YK1191	78740_2	78728_1	F	LOW FAT	2022-03-06	3	13	NA	NA	NA	NA	NA	NA	0.0938049	0.821659	0.069269	0.837427	0.0245359	-0.0157684	143.52	76.4385	78	78	0.366667	73	15540	65	47	54	21	0	2	7.1	2.9	3.2	1.4	0.7	0.8	1.5	0.8	0.9	1	124	228	104	83.871
EE1DCD2F53	YK1136	78727_2	79039_1	M	LOW FAT	2022-01-30	1	8	41700	17671	24029	5852.5	5715	137.5	0.0892708	0.844944	0.0449471	0.875212	0.0443237	-0.0302677	555.739	218.741	99	84	0.6	87	20452.5	103	125	63	33	0	2.1	13.1	8.6	7.6	3.5	1.4	1.4	2.8	1.3	1.1	3	146	448	302	206.849
EE1DCD2F54	YK1166	78971_2	78808_1	M	HIGH FAT	2022-02-19	1	12	32249	13240	19009	4543.5	4011.67	531.833	0.258255	0.743186	0.0498599	0.843389	0.208395	-0.100203	1379.89	151.769	83	67	3.2	110	19132.5	106	117	52	44	0	2	11.2	13.4	0.9	NA	1.1	1.1	2.2	9	NA	0	134	385	251	187.313
EE1DCD2F55	YK1110	78785_2	78705_1	M	LOW FAT	2022-01-15	1	12	37299	18185	19114	5232.5	4545	687.5	0.168747	0.757101	0.0692328	0.852169	0.0995141	-0.0950682	671.838	181.339	115	104	1.6	95	17482.5	90	126	175	133	0	1.8	12.5	11.2	9.3	5.4	1.2	1.2	2.4	1.3	1.5	0	145	417	272	187.586
EE1DCD2F56	YK1140	78803_2	78775_1	M	HIGH FAT	2022-02-01	2	13	46916	16762	30154	6568	5941.67	626.333	0.085751	0.85108	0.0362105	0.872807	0.0495405	-0.0217268	707.655	232.563	78	68	0.4	94	18382.5	74	50	70	38	0	1.8	8.7	6.7	5.5	2.5	1.1	1.1	2.2	1	1.6	0	111	348	237	213.514
EE1DCD2F57	YK1187	79036_2	78703_1	F	LOW FAT	2022-02-28	2	6	47030	20685	26345	6638.5	5838.67	799.833	0.058928	0.84742	0.0564646	0.842694	0.00246333	0.00472683	109.779	102.138	68	76	NA	76	17002.5	66	62	56	33	0	1.8	5.9	1.8	1.8	0.8	0.8	0.8	1.6	0.9	0.7	0	113	210	97	85.8407
EE1DCD2F58	YK1270	78786_2	78796_1	M	LOW FAT	2022-04-18	5	11	41670	13969	27701	5612.5	5158.33	454.167	0.0875394	0.839401	0.0574038	0.866314	0.0301356	-0.0269135	364.824	195.338	100	87	0.6	89	16305	80	66	74	51	0	2	10.4	5.1	3.8	2.3	1.2	1.1	2.3	1.1	1.4	0	126	338	212	168.254
EE1DCD2F59	YK1203	78773_2	78704_1	F	LOW FAT	2022-03-12	3	15	51489	25206	26283	8015.5	4950.33	3065.17	0.0473039	0.852173	0.0279762	0.874137	0.0193277	-0.0219637	207.979	77.5663	63	63	0.45	87	16267.5	68	72	80	47	0	2	6.5	1.5	3.1	1.2	0.7	0.8	1.5	0.9	1.1	0	116	241	125	107.759
EE1DCD2F5A	YK1293	79125_2	79132_1	F	HIGH FAT	2022-05-03	2	9	NA	NA	NA	NA	NA	NA	0.0743056	0.830635	0.0500794	0.867817	0.0242262	-0.0371825	196.751	91.4308	NA	56	NA	83	14610	57	45	74	50	0	1.7	5	1	2.1	1.1	0.7	0.7	1.4	1	1	0	92	191	99	107.609
EE1DCD2F5B	YK1265	78117_2	78420_1	F	LOW FAT	2022-04-16	7	10	47346	20887	26459	5903.5	5723.33	180.167	0.0623386	0.847906	0.0915152	0.823242	-0.0291766	0.0246633	18.2781	78.8383	63	69	NA	76	15292.5	NA	NA	NA	NA	NA	1.8	5.4	2.3	3	1.8	0.8	0.8	1.6	0.9	1.2	0	122	218	96	78.6885
EE1DCD2F5C	YK1194	79039_2	78702_1	M	LOW FAT	2022-03-07	2	10	44882	13317	31565	7454	5183.33	2270.67	0.0748603	0.856796	0.0536391	0.854985	0.0212211	0.0018117	327.651	207.071	86	96	0.8	91	21577.5	65	91	56	31	0	2.1	8.5	5.5	3.3	2.6	1	1.1	2.1	1.2	1.1	1	123	361	238	193.496
EE1DCD2F5D	YK1214	78853_2	79125_1	M	HIGH FAT	2022-03-19	1	10	44608	10855	33753	6083	6159.67	-76.6667	NA	NA	0.0604136	0.862603	NA	NA	NA	NA	88	64	2.2	93	17902.5	98	127	64	50	170	2.1	9.9	11.4	10.2	4.7	1.5	1.4	2.9	1.2	2	2	158	403	245	155.063
EE1DCD2F5E	YK1264	78117_2	78420_1	M	HIGH FAT	2022-04-16	7	10	29524	10225	19299	4864.5	3297.67	1566.83	0.188783	0.755751	0.0487644	0.872557	0.140018	-0.116806	1224.93	196.427	90	62	1.2	107	15735	71	114	52	37	0	2.1	10.5	15.3	8.8	3.8	1.1	1.1	2.2	1.4	1.7	1	131	422	291	222.137
EE1DCD2F5F	YK1276	78203_2	78107_1	M	HIGH FAT	2022-04-23	9	9	39713	13045	26668	5484.5	5230.67	253.833	0.238421	0.840795	0.0721289	0.830196	0.166292	0.0105986	797.204	174.894	84	70	2.2	127	23737.5	117	122	60	53	0	1.9	11.2	15.6	9.3	6.4	1	0.9	1.9	2	1.5	2	139	388	249	179.137
EE1DCD2F60	YK1247	78795_2	78740_1	F	HIGH FAT	2022-04-06	4	12	64051	18081	45970	8908	8365.33	542.667	0.186956	0.737519	0.0814943	0.835824	0.105462	-0.0983047	477.48	122.118	63	NA	0.733333	88	19537.5	49	63	55	42	0	1.8	5.4	4.7	8.7	1.5	0.8	0.8	1.6	0.8	2.8	0	92	231	139	151.087
EE1DCD2F61	YK1202	78773_2	78704_1	M	HIGH FAT	2022-03-12	3	15	48202	17596	30606	6389	6954.67	-565.667	0.166083	0.760959	0.0518362	0.855989	0.114247	-0.0950293	815.041	153.888	72	62	1.6	109	17550	78	73	53	57	0	1.9	10.4	12.2	10.9	3.2	1.1	1.1	2.2	0.9	1.4	2	136	359	223	163.971
EE1DCD2F62	YK1245	78779_2	79127_1	F	HIGH FAT	2022-04-04	1	10	NA	NA	NA	NA	NA	NA	0.0850543	0.826993	0.0816667	0.821771	0.00338768	0.00522192	99.6173	92.8846	51	NA	0.166667	62	15495	55	70	71	32	0	1.7	5.1	2.1	5	1.3	0.6	0.9	1.5	0.7	1	0	105	208	103	98.0952
EE1DCD2F63	YK1232	78709_2	78768_1	M	LOW FAT	2022-03-30	4	9	35122	11447	23675	4925	4335	590	0.118414	0.821476	0.0460204	0.89017	0.0723932	-0.0686942	771.693	212.632	89	85	1.6	81	13657.5	72	NA	55	32	NA	1.9	9.3	7.9	7	3.4	1.1	1.2	2.3	1.5	1.4	0	116	361	245	211.207
EE1DCD2F64	YK1248	78728_2	78738_1	M	LOW FAT	2022-04-07	4	14	45064	8894	36170	5665.5	6033.67	-368.167	0.125691	0.811382	0.0523636	0.853788	0.0733274	-0.0424058	705.208	218.793	66	NA	0.9	92	16972.5	73	108	58	31	0	2.1	8.8	9.4	5.2	2.4	1.1	1.1	2.2	1.2	1.7	0	134	390	256	191.045
EE1DCD2F65	YK1215	78853_2	79125_1	F	LOW FAT	2022-03-19	1	10	53714	19109	34605	7610	6835.67	774.333	NA	NA	0.059881	0.841875	NA	NA	NA	NA	81	70	0.166667	77	14317.5	64	54	63	32	170	1.8	5.7	1.1	1.9	1.8	0.8	0.7	1.5	0.7	1.4	0	118	216	98	83.0508
EE1DCD2F66	YK1256	78062_2	78154_1	M	LOW FAT	2022-04-12	3	13	53549	14610	38939	8323.5	6308.67	2014.83	0.114278	0.821955	0.0464333	0.863867	0.0678443	-0.041912	768.772	235.874	120	100	0.3	100	16980	NA	NA	NA	NA	NA	1.9	11.5	8.5	6.1	3.8	1.3	1.3	2.6	1.3	1.2	1	118	383	265	224.576
EE1DCD2F67	YK1230	78700_2	78771_1	M	LOW FAT	2022-03-27	4	12	39986	15597	24389	5794.5	5012	782.5	0.0936991	0.832153	0.0679722	0.851639	0.0257268	-0.0194863	266.449	159.751	91	103	0.5	84	15817.5	123	155	81	41	170	2.1	8.3	6.9	4.1	3.1	1	1.1	2.1	1.2	1	0	139	334	195	140.288
EE1DCD2F68	YK1282	78699_2	78787_1	M	HIGH FAT	2022-04-26	5	10	29043	11583	17460	4568.5	3224.67	1343.83	0.151928	0.791269	0.0463478	0.877333	0.10558	-0.0860643	1082.93	225.469	101	88	2.4	101	18945	105	123	66	66	0	2	12	16.3	9	4.7	1.3	1.3	2.6	1.5	1.6	0	134	422	288	214.925
EE1DCD2F69	YK1226	79037_2	78776_1	M	HIGH FAT	2022-03-30	3	9	NA	NA	NA	NA	NA	NA	0.166058	0.762374	0.0804361	0.835234	0.0856221	-0.07286	650.542	231.838	83	84	1.8	99	18705	92	137	65	42	130	1.9	9.9	13.7	9.9	4.3	1.2	1.2	2.4	1.3	1.8	3	125	417	292	233.6
EE1DCD2F6A	YK1291	79131_2	79124_1	F	HIGH FAT	2022-05-03	2	13	64394	29619	34775	8926	7435	1491	0.0839506	0.837333	0.053179	0.864043	0.0307716	-0.0267099	294.66	142.272	NA	74	NA	88	12510	70	47	65	33	180	1.9	8.3	2.4	9.3	2.5	1	1	2	0.9	1.2	0	125	297	172	137.6
EE1DCD2F6B	YK1277	78203_2	78107_1	F	LOW FAT	2022-04-23	9	9	54376	21210	33166	7140.5	6872	268.5	0.127623	0.784923	0.0666667	0.83027	0.0609568	-0.0453474	272.523	83.9663	50	67	NA	104	18232.5	101	96	69	28	0	1.9	8.9	4.6	4.8	2.6	0.8	0.9	1.7	0.7	0.6	3	123	243	120	97.561
EE1DCD2F6C	YK1213	78704_2	78959_1	F	LOW FAT	2022-03-15	3	11	66347	32177	34170	9174.5	8359.33	815.167	0.0877778	0.821424	0.0527124	0.87317	0.0350654	-0.0517458	247.737	96.4482	65	63	2.6	81	14685	65	62	70	41	210	1.8	5.4	2.3	3.9	1.3	0.8	0.9	1.7	0.7	1.3	0	120	229	109	90.8333
EE1DCD2F6D	YK1238	78775_2	78711_1	M	HIGH FAT	2022-04-02	4	14	38392	13526	24866	5192	5132.67	59.3333	0.24518	0.698153	0.0842308	0.838744	0.16095	-0.140591	768.767	148.433	76	NA	2.5	92	19372.5	111	95	62	58	0	2	11.1	20.6	14.4	7.2	1.2	1.3	2.5	1.4	1.3	3	150	416	266	177.333
EE1DCD2F6E	YK1272	78172_2	78063_1	M	LOW FAT	2022-04-19	8	7	37519	13451	24068	5297.5	4836	461.5	0.175058	0.762937	0.0624934	0.848294	0.112565	-0.0853569	846.241	203.806	106	108	1.8	94	15375	127	164	72	52	0	2.1	15.2	12.7	10.4	6.5	1.6	1.7	3.3	1.2	1.5	2	152	477	325	213.816
EE1DCD2F6F	YK1241	79127_2	78706_1	F	LOW FAT	2022-04-02	2	9	51972	15737	36235	7818.5	6650.33	1168.17	0.100466	0.773898	0.0683036	0.842202	0.0321625	-0.0683041	209.935	93.625	66	NA	1.2	83	11610	81	142	70	47	0	2	7	3.9	6.1	1.9	1.1	0.8	1.9	1.2	0.9	0	127	248	121	95.2756
EE1DCD2F70	YK1263	78416_2	78114_1	F	LOW FAT	2022-04-16	7	10	53857	19373	34484	6371.5	7258.33	-886.833	0.0593277	0.853543	0.0712202	0.835417	-0.0118925	0.0181268	77.0163	117.111	77	83	0.133333	70	14745	NA	NA	NA	NA	NA	1.4	7.8	1.6	3.4	1.3	0.9	0.9	1.8	1	1.4	0	122	258	136	111.475
EE1DCD2F71	YK1296	78776_2	79126_1	M	LOW FAT	2022-05-05	1	6	37723	16927	20796	5429	4354	1075	0.0853333	0.855396	0.0710057	0.855948	0.0143276	-0.00055272	288.507	223.067	NA	98	1.3	88	14902.5	68	149	40	27	0	2.1	9.3	7.7	4.5	2.7	1.2	1.3	2.5	1.1	0.6	1	138	403	265	192.029
EE1DCD2F72	YK1235	78739_2	78791_1	F	LOW FAT	2022-03-29	4	7	76620	34145	42475	11171.5	9924.33	1247.17	0.0842628	0.835224	0.0544108	0.850774	0.029852	-0.0155501	225.371	106.261	62	76	0.333333	91	14362.5	59	70	67	26	140	2	6.7	3.1	2.9	1.4	0.7	0.8	1.5	0.9	1.2	0	108	247	139	128.704
EE1DCD2F73	YK1292	79125_2	79132_1	M	LOW FAT	2022-05-03	2	9	52918	19503	33415	7795	6227	1568	0.103638	0.901257	0.0387719	0.884281	0.0648656	0.0169759	609.05	170.356	NA	68	0.5	86	15337.5	44	113	51	34	0	1.9	7.6	4.2	2.2	1.2	1	1	2	1.1	1.3	1	112	303	191	170.536
EE1DCD2F74	YK1237	79111_2	79074_1	F	LOW FAT	2022-03-29	3	11	71735	31862	39873	7337	10924.3	-3587.33	0.0465869	0.864211	0.0507018	0.860877	-0.00411483	0.00333333	102.145	120.852	76	81	0.166667	80	14205	85	61	67	30	85	1.8	5.3	1.1	1	0.8	0.7	0.8	1.5	0.7	0.6	0	108	226	118	109.259
EE1DCD2F75	YK1290	79131_2	79124_1	M	LOW FAT	2022-05-03	2	13	26970	10721	16249	4070	3431.33	638.667	0.164093	0.725076	0.0520833	0.875641	0.11201	-0.150565	1029.97	196.984	NA	81	1.5	99	16642.5	141	280	51	42	0	2	10.3	10.3	8.9	4.2	1.2	1.1	2.3	1.1	0.6	2	125	383	258	206.4
EE1DCD2F76	YK1289	78829_2	78739_1	F	LOW FAT	2022-05-03	5	12	38479	16280	22199	5734.5	4679.33	1055.17	0.0532112	0.848813	0.0546953	0.84276	-0.00148417	0.00605341	99.8034	106.852	NA	80	NA	87	16650	NA	NA	NA	NA	NA	1.9	6.4	3.4	1.7	1.4	0.8	0.8	1.6	0.9	0.7	0	102	228	126	123.529
EE1DCD2F77	YK1295	78798_2	78766_1	F	HIGH FAT	2022-05-03	2	14	67516	22995	44521	9656.5	9412.33	244.167	0.0784366	0.844115	0.0390942	0.881377	0.0393424	-0.0372618	392.864	135.267	NA	67	0.733333	100	17092.5	65	108	72	59	103.3	1.8	7.3	2.1	3.5	1.6	1.4	NA	NA	0.9	1.4	0	108	260	152	140.741
EE1DCD2F78	YK1297	78776_2	79126_1	F	HIGH FAT	2022-05-05	1	6	118590	55713	62877	20398	16436.7	3961.33	0.204498	0.726678	0.0738182	0.846242	0.13068	-0.119564	635.386	127.949	NA	94	1.4	119	16980	79	177	50	48	0	1.8	7.5	7.8	11.6	3.9	1.1	1.1	2.2	1.3	1.4	0	124	331	207	166.935
EE1DCD2F79	YK1222	78707_2	78709_1	M	LOW FAT	2022-03-25	4	11	39017	17641	21376	5119.5	4818.33	301.167	NA	NA	0.0528571	0.853773	NA	NA	NA	NA	113	103	2	87	15810	92	113	56	39	220	2	11.2	10	7.4	4.2	1.2	1.1	2.3	1.3	1.8	0	112	393	281	250.893
EE1DCD2F7A	YK1286	78112_2	78086_1	M	HIGH FAT	2022-04-30	9	9	52663	18238	34425	8584	5991.67	2592.33	0.228939	0.707049	0.0957794	0.814388	0.13316	-0.107339	618.803	161.084	NA	73	0.5	114	16755	73	98	86	68	0	1.8	11.2	14.5	10.8	5.7	1.4	1.4	2.8	1.2	1.7	2	162	426	264	162.963
EE1DCD2F7B	YK1212	78704_2	78959_1	M	HIGH FAT	2022-03-15	3	11	34697	16546	18151	5035.5	4348.67	686.833	0.135071	0.80484	0.0386667	0.872174	0.0964043	-0.0673335	1042.13	201.715	68	54	1.6	105	15285	69	131	66	58	0	2.2	10.2	12.6	7.3	4.2	1.2	1.2	2.4	1.2	1.3	2	139	396	257	184.892
EE1DCD2F7C	YK1224	78703_2	78735_1	M	LOW FAT	2022-03-25	4	8	38105	19124	18981	5294	4270.33	1023.67	NA	NA	0.0521245	0.877802	NA	NA	NA	NA	93	88	0.4	75	19140	84	59	68	42	180	2	8	3.5	3.2	2	1.1	1.1	2.2	1.3	1.4	2	111	338	227	204.505
EE1DCD2F7D	YK1242	78827_2	78856_1	M	LOW FAT	2022-04-04	4	12	32570	11013	21557	4010.5	4410.33	-399.833	0.0644765	0.870029	0.0571003	0.702141	0.00737619	0.167888	218.557	249.57	105	NA	0.4	104	17325	69	74	64	43	0	2.1	8	4.7	3.4	2.2	1	1	2	1	0.8	0	142	359	217	152.817
EE1DCD2F7E	YK1205	78769_2	78960_1	F	LOW FAT	2022-03-12	3	10	64691	27840	36851	8996.5	8934.33	62.1667	0.0583814	0.851202	0.0532448	0.847345	0.00513657	0.00385679	101.828	84.9086	80	88	0.4	80	14070	66	63	77	48	0	1.8	5.5	1.5	4	1.8	0.8	0.7	1.5	0.9	1.4	0	125	229	104	83.2
EE1DCD2F7F	YK1275	78224_2	78054_1	F	LOW FAT	2022-04-23	8	5	49143	20548	28595	6562.5	6577.67	-15.1667	0.0714242	0.837561	0.0477686	0.850441	0.0236556	-0.0128802	171.857	79.0645	75	89	NA	85	17347.5	NA	NA	NA	NA	NA	1.9	5.9	3.1	2.4	1.6	0.8	0.8	1.6	0.8	0.8	0	130	236	106	81.5385
EE1DCD2F80	YK1243	78827_2	78856_1	F	HIGH FAT	2022-04-04	4	12	65560	25228	40332	8322	9431	-1109	0.0719492	0.858969	0.0491026	0.856122	0.0228466	0.00284713	232.507	127.678	65	NA	0.266667	79	13980	66	52	76	66	0	1.9	6.1	3.6	5	1.7	0.9	0.8	1.7	0.9	1.1	0	116	259	143	123.276
EE1DCD2F81	YK1234	78739_2	78791_1	M	HIGH FAT	2022-03-29	4	7	43511	13301	30210	5538	6175	-637	0.234986	0.707441	0.0735345	0.844339	0.161452	-0.136898	1227.82	248.147	101	90	2.9	96	16222.5	73	74	67	36	140	2.2	12.2	17.9	9.8	7.1	1.4	1.4	2.8	1.5	1.4	2	133	508	375	281.955
EE1DCD2F82	YK1225	78703_2	78735_1	F	HIGH FAT	2022-03-25	4	8	NA	NA	NA	NA	NA	NA	NA	NA	0.042428	0.857366	NA	NA	NA	NA	60	53	0.733333	99	21390	74	37	51	41	95	1.8	5.6	3.6	4	1	0.8	0.8	1.6	0.9	0.8	0	100	240	140	140
EE1DCD2F83	YK1210	78808_2	78707_1	M	HIGH FAT	2022-03-14	3	11	31522	13892	17630	4331.5	4301.33	30.1667	0.236841	0.708775	0.0566406	0.861276	0.1802	-0.152501	1588.92	232.389	84	70	0.9	149	24772.5	NA	NA	NA	NA	NA	2.1	15	25.1	16.9	7.4	1.5	1.6	3.1	1.5	2	NA	154	541	387	251.299
EE1DCD2F84	YK1266	78072_2	78050_1	M	LOW FAT	2022-04-16	7	4	34880	13196	21684	4729.5	4147	582.5	0.204821	0.737568	0.113762	0.802405	0.0910587	-0.064837	389.975	150.153	84	72	2.2	105	15420	81	187	51	23	0	2	13	12.2	9	5.8	1.3	1.3	2.6	1.4	1	2	157	400	243	154.777
EE1DCD2F85	YK1267	78072_2	78050_1	F	HIGH FAT	2022-04-16	7	4	46758	19573	27185	6151	6149	2	0.0811169	0.822932	0.0833046	0.818764	-0.00218767	0.00416757	60.3311	65.4933	50	56	NA	94	16920	NA	NA	NA	NA	NA	1.9	5.7	2.4	2.1	0.7	1	0.9	1.9	0.9	1.1	0	126	237	111	88.0952
EE1DCD2F86	YK1271	78766_2	78786_1	F	HIGH FAT	2022-04-18	5	11	NA	NA	NA	NA	NA	NA	0.152829	0.770523	0.0889272	0.817739	0.0639016	-0.0472169	265.446	100.365	37	40	NA	75	13807.5	NA	NA	NA	NA	NA	1.8	5.1	2.8	4	1.1	0.6	0.6	1.2	0.7	0.7	0	97	197	100	103.093
EE1DCD2F87	YK1281	78770_1	78828_1	F	HIGH FAT	2022-04-26	5	9	NA	NA	NA	NA	NA	NA	NA	NA	NA	NA	NA	NA	NA	NA	NA	200	NA	NA	NA	NA	NA	NA	NA	NA	NA	NA	NA	NA	NA	NA	NA	NA	NA	NA	0	NA	NA	NA	NA
EE1DCD2F88	YK1285	78710_2	78745_1	F	LOW FAT	2022-04-29	4	8	NA	NA	NA	NA	NA	NA	0.138069	0.776221	0.08625	0.82375	0.0518193	-0.0475289	267.457	116.301	43	49	NA	61	12645	92	149	133	43	0	2	5.7	4.2	5.7	0.8	0.7	0.7	1.4	0.8	0.4	0	103	221	118	114.563
EE1DCD2F89	YK1283	78709_2	78768_1	F	LOW FAT	2022-04-26	5	10	38330	16940	21390	5634	4947.67	686.333	0.0784434	0.840236	0.054767	0.849391	0.0236764	-0.00915483	226.505	125.5	69	77	NA	72	13882.5	51	62	64	35	0	1.8	5.7	2.4	5.9	1.9	0.7	0.7	1.4	0.8	1.3	0	107	230	123	114.953
EE1DCD2F8A	YK1240	79127_2	78706_1	M	HIGH FAT	2022-04-02	2	9	37979	11714	26265	5146	5237	-91	0.119343	0.818293	0.0533577	0.858808	0.0659853	-0.0405145	579.161	189.325	96	NA	1.5	88	18157.5	96	168	71	64	0	2.3	13	10.3	9.2	4.3	1.3	1.2	2.5	1.2	1.4	3	158	448	290	183.544
EE1DCD2F8B	YK1209	78960_2	78773_1	F	HIGH FAT	2022-03-15	3	5	42360	18902	23458	5848	5443.67	404.333	0.0769746	0.830091	0.0689474	0.836737	0.00802727	-0.00664626	116.234	92.1458	54	62	0.233333	89	15600	85	48	65	46	0	1.8	5.8	1.8	2.7	0.8	0.7	0.7	1.4	0.7	1.2	0	103	201	98	95.1456
EE1DCD2F8C	YK1219	78115_2	78224_1	F	HIGH FAT	2022-03-20	7	13	63078	18997	44081	7717.5	8524	-806.5	NA	NA	0.0551613	0.854982	NA	NA	NA	NA	59	63	0.4	92	16837.5	92	71	61	50	135	1.9	6.1	2.9	4.8	1.3	0.9	0.9	1.8	1	1.1	0	104	233	129	124.038
EE1DCD2F8D	YK1279	79037_2	78776_1	F	HIGH FAT	2022-04-25	4	11	NA	NA	NA	NA	NA	NA	NA	NA	NA	NA	NA	NA	NA	NA	NA	200	NA	NA	NA	NA	NA	NA	NA	NA	NA	NA	NA	NA	NA	NA	NA	NA	NA	NA	0	NA	NA	NA	NA
EE1DCD2F8E	YK1244	78779_2	79127_1	M	LOW FAT	2022-04-04	1	10	42300	11963	30337	5324.5	5879	-554.5	0.127193	0.80193	0.060915	1.02879	0.0662779	-0.226861	522.318	132.318	69	NA	2.1	80	14272.5	82	139	58	26	0	2	7.5	9	6.4	2.2	1.1	1	2.1	1	0.8	0	117	324	207	176.923
EE1DCD2F8F	YK1258	78802_2	78779_1	M	HIGH FAT	2022-04-12	4	10	32613	13733	18880	4384	4108	276	0.083729	0.852888	0.0390031	0.745389	0.0447259	0.107499	576.118	260.375	75	52	1.7	84	14962.5	65	76	57	44	0	2.2	7.4	6.4	6.4	2.7	1	1	2	0.9	1.2	2	146	353	207	141.781
EE1DCD2F90	YK1233	78774_2	78780_1	F	HIGH FAT	2022-03-27	4	7	58544	23699	34845	7237	7686.33	-449.333	0.104178	0.811487	0.0646061	0.861121	0.0395723	-0.0496345	212.242	82.4753	72	59	0.466667	97	19425	75	56	69	45	70	1.9	5.7	2.6	5.6	1.2	0.9	0.8	1.7	0.7	1.2	0	122	230	108	88.5246
EE1DCD2F91	YK1262	78416_2	78114_1	M	HIGH FAT	2022-04-16	7	10	25363	8455	16908	5519	625	4894	0.17516	0.762007	0.06691	0.842068	0.10825	-0.0800612	817.2	217.053	93	89	2.6	99	15202.5	81	126	73	54	0	2.1	13.7	17.2	13.4	6.3	1.4	1.4	2.8	1.6	1.5	2	160	500	340	212.5
EE1DCD2F92	YK1221	78791_2	78767_1	F	HIGH FAT	2022-03-21	4	5	145368	83354	62014	37967	6301.33	31665.7	NA	NA	0.0772951	0.830383	NA	NA	NA	NA	70	65	1.26667	93	17505	73	80	59	32	115	1.9	6.3	5.4	7.2	2.1	0.9	0.9	1.8	0.9	1.1	0	130	265	135	103.846
EE1DCD2F93	YK1197	78699_2	78787_1	F	HIGH FAT	2022-03-07	3	2	46065	18016	28049	6833	6103	730	0.0771337	0.837069	0.0460284	0.869504	0.0311053	-0.0324343	269.029	111.998	58	67	0.3	85	16740	59	44	48	36	0	1.7	6.8	2.7	4.3	1.2	0.8	0.8	1.6	0.9	1.4	0	106	242	136	128.302
EE1DCD2F94	YK1211	78808_2	78707_1	F	LOW FAT	2022-03-14	3	11	51818	19899	31919	7265.5	6616	649.5	0.0714938	0.825671	0.0424269	0.85538	0.0290669	-0.0297093	256.237	104.061	93	82	0.2	91	17452.5	NA	NA	NA	NA	NA	1.9	5.9	1.2	2.9	1.3	NA	1.3	NA	0.9	1.3	0	129	249	120	93.0233
EE1DCD2F95	YK1260	79130_2	78806_1	M	HIGH FAT	2022-04-12	2	7	44243	12708	31535	5047.5	6243	-1195.5	0.113729	0.828337	0.0469421	0.854573	0.0667871	-0.0262357	742.958	237.252	112	96	0.8	102	15420	69	57	57	45	73.3	2.3	11.6	13.1	7.6	5.1	1.4	1.4	2.8	1.6	1.6	0	111	459	348	313.514
EE1DCD2F96	YK1254	78960_2	78773_1	M	LOW FAT	2022-04-11	4	15	47979	16107	31872	6282	6366.33	-84.3333	0.0750794	0.853651	0.0521186	0.867373	0.0229607	-0.0137221	310.19	180.241	100	100	0.8	82	15562.5	59	82	71	37	0	2.1	11.4	5.4	5.6	2.5	1.3	1.4	2.7	1.2	1.9	0	136	370	234	172.059
EE1DCD2F97	YK1228	78224_2	78054_1	M	HIGH FAT	2022-03-27	7	11	31164	12414	18750	4347	3858	489	0.145694	0.786536	0.0598775	0.848431	0.085817	-0.0618954	629.963	178.114	64	54	2.3	97	15615	118	69	45	29	140	2.1	10.9	10.5	11.1	4.7	1.5	1.4	2.9	1.2	1.7	1	152	428	276	181.579
EE1DCD2F98	YK1294	78798_2	78766_1	M	LOW FAT	2022-05-03	2	14	43244	16810	26434	6563.5	5298.33	1265.17	0.0974955	0.837647	0.0548299	0.863129	0.0426656	-0.0254822	578.598	270.366	NA	62	1.1	92	15945	86	178	63	41	0	1.9	12.7	6.3	4.2	1	1.3	1.2	2.5	1	0.6	1	120	399	279	232.5
EE1DCD2F99	YK1217	78708_2	78971_1	F	LOW FAT	2022-03-20	3	9	53125	24071	29054	7555	6503.33	1051.67	NA	NA	0.0367507	0.86577	NA	NA	NA	NA	72	68	0.233333	77	17302.5	68	79	64	47	120	1.8	7.5	2.8	6.2	2.6	0.9	1	1.9	1	1	0	131	264	133	101.527
EE1DCD2F9A	YK1229	78224_2	78054_1	F	LOW FAT	2022-03-27	7	11	41596	19241	22355	5144.5	5492.67	-348.167	0.0350463	0.864136	0.0422654	0.856472	-0.00721908	0.00766331	73.8897	111.585	70	76	0.2	72	12667.5	76	64	82	39	105	1.9	6.5	2	2.7	1.1	0.9	0.9	1.8	0.9	1.4	0	116	248	132	113.793
EE1DCD2F9B	YK1288	78795_2	78740_1	M	HIGH FAT	2022-04-30	5	13	43492	11433	32059	7463	4850.67	2612.33	0.14695	0.79307	0.0626042	0.843125	0.0843462	-0.0500551	704.437	222.362	NA	65	1.4	105	17002.5	92	107	59	59	NA	2	8.3	10.5	7.2	3.5	1	1	2	0.4	1.1	0	114	356	242	212.281
EE1DCD2F9C	YK1195	79039_2	78702_1	F	HIGH FAT	2022-03-07	2	10	43476	14694	28782	7091	5555.33	1535.67	0.122051	0.791795	0.0726235	0.844321	0.0494278	-0.0525261	264.131	103.188	61	62	0.333333	91	19065	56	47	59	39	0	1.8	6.5	3	5	2	0.8	0.8	1.6	1	1.4	0	122	248	126	103.279
EE1DCD2F9D	YK1200	78800_2	78830_1	M	LOW FAT	2022-03-07	3	12	42341	14402	27939	6172.5	5055.33	1117.17	0.151598	0.780716	0.0646903	0.852448	0.0869075	-0.0717321	652.804	194.207	82	88	1.5	90	16245	53	154	57	33	0	2.1	9.5	9	8.9	4.8	1.2	1.2	2.4	1.2	1.4	2	135	383	248	183.704
EE1DCD2F9E	YK1227	78786_2	78796_1	F	LOW FAT	2022-03-27	4	2	52007	20509	31498	6914	6888.67	25.3333	0.0803148	0.831556	0.0583529	0.865451	0.0219619	-0.0338954	191.465	103.471	60	66	NA	87	14422.5	NA	NA	NA	NA	NA	1.8	4.6	2.5	3	1.4	0.7	0.6	1.3	0.7	0.5	0	94	204	110	117.021
EE1DCD2F9F	YK1231	78700_2	78771_1	F	HIGH FAT	2022-03-27	4	12	54519	24483	30036	9118.5	6118.67	2999.83	NA	NA	NA	NA	NA	NA	NA	NA	65	43	0.766667	88	20040	68	114	61	38	66.7	1.9	7.3	5.7	8.8	2.5	NA	1.5	NA	0.9	1.3	0	113	258	145	128.319
EE1DCD2FA0	YK1239	78775_2	78711_1	F	LOW FAT	2022-04-02	4	14	44509	14497	30012	8280	3105.67	5174.33	0.120491	0.799538	0.0617284	0.853364	0.0587622	-0.053826	317.5	100.398	81	NA	NA	88	16260	79	93	65	37	0	2	7.9	3.9	5.5	1.9	1.1	1.1	2.2	1.5	1	0	125	259	134	107.2
EE1DCD2FA1	YK1220	78791_2	78767_1	M	LOW FAT	2022-03-21	4	5	38637	13141	25496	5200	4580.33	619.667	NA	NA	0.07696	0.83808	NA	NA	NA	NA	112	96	3.6	87	13380	106	208	148	89	160	2	13.1	9.8	9.7	4.7	1.3	1.4	2.7	1.2	1.5	3	143	423	280	195.804
EE1DCD2FA2	YK1255	78745_2	78764_1	F	HIGH FAT	2022-04-12	4	11	46711	21629	25082	6184.5	6148.33	36.1667	0.126158	0.791356	0.069537	0.849198	0.0566212	-0.0578416	296.449	103.635	70	51	0.166667	82	19545	46	42	61	37	0	1.8	6.7	4.5	3.8	1.6	0.9	0.9	1.8	1	0.6	0	124	256	132	106.452
EE1DCD2FA3	YK1199	78712_2	78795_1	F	HIGH FAT	2022-03-07	3	3	70465	28661	41804	8724	9611.33	-887.333	0.184662	0.738953	0.0727034	0.837087	0.111958	-0.0981339	421.986	81.4191	58	55	0.466667	88	18502.5	61	56	68	40	0	1.9	7.1	4.4	10	3.7	0.9	0.9	1.8	1	1.5	0	145	274	129	88.9655
EE1DCD2FA4	YK1278	78312_2	78414_1	M	LOW FAT	2022-04-24	8	2	30773	10050	20723	4444.5	4121.33	323.167	0.129881	0.80912	0.0698246	0.832193	0.0600567	-0.0230733	449.874	187.418	87	94	2.2	115	16852.5	52	153	48	32	0	1.8	10.8	5.8	4.7	2.5	1.1	1.2	2.3	1.2	1.1	0	131	365	234	178.626
EE1DCD2FA5	YK1201	78800_2	78830_1	F	HIGH FAT	2022-03-07	3	12	104907	48991	55916	17719.5	9809.67	7909.83	0.122309	0.803709	0.0518768	0.856695	0.0704319	-0.0529852	409.179	102.609	61	70	0.266667	72	19627.5	66	46	58	36	0	1.9	7.5	3.7	7.5	2.6	0.9	0.9	1.8	1.4	1.6	0	134	285	151	112.687
EE1DCD2FA6	YK1207	78885_2	78778_1	F	HIGH FAT	2022-03-12	3	12	45710	19138	26572	6493	6028.67	464.333	0.224739	0.691709	0.065546	0.833103	0.159193	-0.141394	712.845	96.8336	67	51	NA	104	16132.5	NA	NA	NA	NA	NA	1.9	9.9	8.6	9.3	4.2	0.9	0.9	1.8	1	1	0	129	290	161	124.806
EE1DCD2FA7	YK1208	78745_2	78764_1	M	LOW FAT	2022-03-13	3	12	55163	23729	31434	7690	6834	856	0.149804	0.77808	0.0429199	0.875039	0.106884	-0.0969587	1003.91	181.234	121	109	0.433333	87	15397.5	52	78	104	51	0	1.9	10.9	11	9	4.4	1.3	1.4	2.7	1.2	1.6	0	149	426	277	185.906
EE1DCD2FA8	YK1261	79130_2	78806_1	F	LOW FAT	2022-04-12	2	7	51991	22988	29003	6980.5	7314.67	-334.167	0.0605767	0.851505	0.0641176	0.853856	-0.00354099	-0.00235129	119.521	131.713	93	89	1.2	93	13365	76	50	65	28	180	1.9	8.5	1.8	3.8	1.6	1	1	2	1	1.4	0	113	260	147	130.088
EE1DCD2FA9	YK1257	78062_2	78154_1	F	HIGH FAT	2022-04-12	3	13	65210	28095	37115	9242	8584.67	657.333	0.0928992	0.817801	0.0654839	0.828996	0.0274153	-0.0111953	263.054	152.458	79	73	0.5	97	18262.5	55	51	58	22	0	1.9	9.5	3.7	4.7	1.9	1	1	2	0.9	1.2	0	102	271	169	165.686
EE1DCD2FAA	YK1284	78710_2	78745_1	M	HIGH FAT	2022-04-29	4	8	31422	9080	22342	4313	4115.33	197.667	0.142382	0.80048	0.0733333	0.836489	0.0690488	-0.0360096	717.94	303.141	85	77	1.1	90	18045	58	84	61	57	0	2	14	13.3	7.8	4.9	1.5	1.3	2.8	1.4	1.8	2	111	440	329	296.396
EE1DCD2FAB	YK1274	78224_2	78054_1	M	HIGH FAT	2022-04-23	8	5	28455	10597	17858	3962	3697	265	0.1545	0.785984	0.0521941	0.864051	0.102306	-0.0780665	686.863	141.806	81	72	1	91	18465	81	80	49	45	0	2	10.7	11	11.7	4.6	1.3	1.4	2.7	1.3	1.7	2	182	432	250	137.363
EE1DCD2FAC	YK1246	78795_2	78740_1	M	LOW FAT	2022-04-06	4	12	46718	10420	36298	6298	6427.67	-129.667	0.0580468	0.877696	0.0647826	0.840145	-0.00673583	0.037551	177.573	223.629	77	NA	0.6	80	16312.5	62	96	54	39	0	2	6.1	3.4	3.1	1.4	0.9	1	1.9	0.9	1	0	107	298	191	178.505
EE1DCD2FAD	YK1268	78767_2	79133_1	M	LOW FAT	2022-04-17	1	12	37386	15213	22173	5046	4370	676	0.13496	0.802964	0.0582424	0.866303	0.076718	-0.0633391	698.387	219.354	108	99	1.6	130	16507.5	81	189	63	37	0	1.6	11.4	10.5	10.2	4.6	1.3	1.2	2.5	1.4	1.2	0	130	395	265	203.846
EE1DCD2FAE	YK1269	78767_2	79133_1	F	HIGH FAT	2022-04-17	1	12	57816	23297	34519	7786	8072	-286	0.104933	0.82625	0.0338824	0.874157	0.071051	-0.0479069	628.704	122.399	65	60	0.2	95	14190	76	38	66	40	0	1.7	5.7	2.7	3.8	1.9	0.6	0.6	1.2	0.8	0.6	0	95	216	121	127.368
EE1DCD2FAF	YK1216	78708_2	78971_1	M	HIGH FAT	2022-03-20	3	9	38237	12115	26122	5212	4982.33	229.667	NA	NA	0.0641344	0.833928	NA	NA	NA	NA	84	58	1.2	105	16762.5	77	87	65	58	115	2	10	8.3	4.8	2.9	1.8	1.2	3	1.2	0.9	1	140	368	228	162.857
EE1DCD2FB0	YK1287	78112_2	78086_1	F	LOW FAT	2022-04-30	9	9	56902	24004	32898	6742.5	8183.33	-1440.83	0.0336632	0.87526	0.0472327	0.858145	-0.0135695	0.0171158	29.0945	84.7448	NA	61	NA	79	13155	NA	NA	NA	NA	NA	1.7	5.4	1.3	2.7	0.3	0.6	0.6	1.2	0.6	0.9	0	114	217	103	90.3509
EE1DCD2FB1	YK1280	78266_1	78121_1	M	LOW FAT	2022-04-26	9	10	34099	11338	22761	5316	4081.67	1234.33	0.107586	0.823218	0.0704545	0.847273	0.0371317	-0.0240543	302.581	156.152	85	82	1.4	83	14040	61	117	50	35	0	2	8.3	6.1	3.6	2.1	1.1	1.1	2.2	1	1.1	0	129	308	179	138.76
EE1DCD2FB2	YK1204	78769_2	78960_1	M	HIGH FAT	2022-03-12	3	10	32375	11727	20648	4769.5	3996.33	773.167	0.157323	0.779408	0.040068	0.873605	0.117255	-0.0941971	1134.01	180.398	100	92	1.9	103	16327.5	NA	NA	NA	NA	NA	2	13	14.3	10.2	5.2	1.5	1.5	3	1.4	1.6	2	169	500	331	195.858
EE1DCD2FB3	YK1249	78728_2	78738_1	F	HIGH FAT	2022-04-07	4	14	50991	16816	34175	7586.5	5584.67	2001.83	0.0955128	0.815465	0.054127	0.855119	0.0413858	-0.0396543	336.95	136.136	63	NA	0.133333	78	15750	74	67	78	49	0	1.6	5.6	2.9	4.4	1.4	0.7	0.7	1.4	0.8	1	0	96	225	129	134.375
EE1DCD2FB4	YK1259	78802_2	78779_1	F	LOW FAT	2022-04-12	4	10	47496	22905	24591	6143	6629.67	-486.667	0.0552273	0.842803	0.0630833	0.8425	-0.00785606	0.00030303	92.6024	120.079	53	60	NA	83	14670	NA	NA	NA	NA	NA	2	4.4	0.7	2.6	0.9	0.6	0.6	1.2	0.8	0.9	0	91	191	100	109.89
EE1DCD2FB5	YK1218	78115_2	78224_1	M	LOW FAT	2022-03-20	7	13	40601	14499	26102	5474	5255.67	218.333	NA	NA	0.0433065	0.874489	NA	NA	NA	NA	108	96	0.6	84	16665	67	86	58	40	180	2.1	10.8	6.1	5.3	2.7	1.2	1.2	2.4	1.2	1.9	0	145	414	269	185.517
EE1DCD2FB6	YK1198	78770_1	78828_1	M	LOW FAT	2022-03-07	3	7	33406	13509	19897	4926.5	3941.67	984.833	0.152797	0.777924	0.0670238	0.847976	0.085773	-0.0700518	517.158	148.35	92	78	1.4	83	13657.5	67	114	46	33	0	2.2	9.9	10.9	6.1	3.1	1.2	1.2	2.4	1.2	1.7	0	161	392	231	143.478
EE1DCD2FB7	YK1273	78172_2	78063_1	F	HIGH FAT	2022-04-19	8	7	NA	NA	NA	NA	NA	NA	0.111311	0.821448	0.0743333	0.855333	0.0369775	-0.0338851	263.473	133.111	77	84	0.133333	74	20295	65	57	68	40	0	2	9.1	5.2	5.5	2.1	1.2	1.3	2.5	1.2	1.6	0	131	296	165	125.954
EE1DCD2FB9	YK1196	78829_2	78739_1	M	LOW FAT	2022-03-07	3	11	30660	12456	18204	4960	3770.67	1189.33	0.152799	0.781266	0.0481746	0.866614	0.104625	-0.0853476	874.19	176.894	103	79	1.9	90	15060	80	178	104	92	0	2.1	9.1	10.8	5.3	4.2	1.2	1.3	2.5	1.3	1	3	149	404	255	171.141
EE1DCD2FBA	YK1206	78885_2	78778_1	M	LOW FAT	2022-03-12	3	12	37556	16135	21421	5330	4437	893	0.128689	0.801243	0.0535028	0.865226	0.0751861	-0.0639835	692.925	205.283	111	93	0.733333	86	17212.5	86	105	58	42	0	2.1	13	9.5	8.3	4	1.4	1.3	2.7	1.2	1.6	0	135	409	274	202.963
EE1DCD2FBB	YK1223	78707_2	78709_1	F	HIGH FAT	2022-03-25	4	11	51289	17140	34149	7080	6817	263	NA	NA	0.0604651	0.840233	NA	NA	NA	NA	58	50	0.2	85	17340	84	59	69	53	300	1.9	5.9	2.5	3.7	1.3	0.6	0.7	1.3	1	0.7	0	99	219	120	121.212
EE1DCD2FBC	YK1384	79365_2	79371_1	M	HIGH FAT	2022-06-26	2	13	34134	17061	17073	4522	4068	454	0.153926	0.785481	0.0391877	0.873978	0.114739	-0.0884969	1124.59	180.196	83	46	2	95	17032.5	NA	NA	NA	NA	NA	2	10.1	9.8	6.5	5.1	1.2	1.2	2.4	1	1.7	1	138	370	232	168.116
EE1DCD2FBD	YK1379	78785_2	78705_1	F	LOW FAT	2022-06-20	7	8	NA	NA	NA	NA	NA	NA	0.0382051	0.856557	0.0736546	0.984699	-0.0354495	-0.128142	13.7405	90.7419	68	NA	0.45	86	15547.5	NA	NA	NA	NA	NA	1.8	6.7	2.1	2.3	NA	0.8	0.8	1.6	NA	NA	0	105	190	85	80.9524
EE1DCD2FBE	YK1373	79347_2	79448_1	F	LOW FAT	2022-06-19	2	12	69966	29443	40523	8472.5	9696.67	-1224.17	0.0776426	0.83455	0.046	0.8405	0.0316426	-0.00595045	274.71	120.428	85	82	0.1	85	14505	78	66	74	34	0	1.6	7.1	2.6	3.1	NA	0.9	0.9	1.8	NA	NA	0	102	248	146	143.137
EE1DCD2FBF	YK1364	79767_2	79555_1	M	LOW FAT	2022-06-12	1	14	41702	13700	28002	5639	5393.67	245.333	0.0576064	0.87828	0.0288418	0.887966	0.0287646	-0.00968596	536.435	215.168	111	108	NA	77	17392.5	56	64	78	42	NA	2	9.1	3.5	3.3	NA	1.3	1.2	2.5	NA	NA	3	142	412	270	190.141
EE1DCD2FC0	YK1358	79129_2	78800_1	M	HIGH FAT	2022-06-11	4	11	52010	19330	32680	7078.5	6526.33	552.167	0.0972222	0.837579	0.0460125	0.857072	0.0512098	-0.019493	527.962	190.437	69	67	1.8	90	19297.5	68	56	59	55	0	1.9	8.9	4.2	4.9	NA	1.1	1.1	2.2	NA	NA	0	117	340	223	190.598
EE1DCD2FC1	YK1311	78133_2	78106_1	F	LOW FAT	2022-05-18	10	7	37356	12723	24633	5532.5	4322.33	1210.17	0.119055	0.79493	0.0581793	0.846975	0.0608756	-0.052045	348.82	105.85	81	96	0.166667	80	14197.5	NA	NA	NA	NA	NA	1.9	7.8	6	6.7	NA	1	1	2	NA	NA	0	137	284	147	107.299
EE1DCD2FC2	YK1367	79752_2	79484_1	F	HIGH FAT	2022-06-12	1	10	33520	14314	19206	4795.5	4182.67	612.833	0.184684	0.745492	0.0571746	0.850794	0.12751	-0.105302	598.334	89.4328	55	65	0.966667	103	14032.5	67	54	52	27	0	1.8	7.5	1.3	9.4	NA	0.8	0.8	1.6	NA	NA	2	115	262	147	127.826
EE1DCD2FC3	YK1308	78853_2	79125_1	M	HIGH FAT	2022-05-12	3	5	37242	14183	23059	5418.5	4432.33	986.167	0.136574	0.809049	0.0720249	0.853427	0.0645494	-0.0443779	539.749	219.839	69	65	1	80	18517.5	NA	NA	NA	NA	NA	2	9.4	7.9	6.2	3.4	1.3	1.3	2.6	1.3	1.7	1	130	398	268	206.154
EE1DCD2FC4	YK1350	78774_2	78780_1	M	LOW FAT	2022-06-05	6	8	28925	12624	16301	4307.5	3361	946.5	0.108339	0.818834	0.0477485	0.868363	0.0605907	-0.0495287	463.258	134.086	74	64	0.6	87	16387.5	63	173	64	44	0	2	7.1	5	3.5	2.7	NA	1.5	NA	0.9	1	0	128	298	170	132.812
EE1DCD2FC5	YK1371	79128_2	79019_1	F	LOW FAT	2022-06-18	1	12	53455	26898	26557	5977.5	7711	-1733.5	0.0487993	0.845717	0.0576736	0.894618	-0.00887433	-0.0489012	63.9374	83.1593	67	67	NA	97	16020	NA	NA	NA	NA	NA	1.9	5.6	1.4	3	NA	0.7	0.8	1.5	NA	NA	2	104	212	108	103.846
EE1DCD2FC6	YK1391	79415_2	79363_1	F	HIGH FAT	2022-06-27	2	9	53880	17158	36722	7353.5	7625	-271.5	0.190289	0.726984	0.0911228	0.832982	0.0991658	-0.105998	407.778	112.216	44	70	0.566667	104	23985	NA	NA	NA	NA	NA	1.8	6.4	4.8	9.6	3.7	0.8	0.7	1.5	1.2	1	0	108	248	140	129.63
EE1DCD2FC7	YK1392	79410_2	79499_1	M	LOW FAT	2022-06-27	1	9	43517	22057	21460	6014	5076.33	937.667	0.0997249	0.832286	0.0563107	0.844045	0.0434142	-0.0117596	441.609	201.564	77	91	1	84	17737.5	NA	NA	NA	NA	NA	1.9	8.4	6.5	4.8	2.5	1.1	1.1	2.2	1.1	0.9	0	119	336	217	182.353
EE1DCD2FC8	YK1321	78803_2	78775_1	F	HIGH FAT	2022-05-17	6	13	44079	16546	27533	5531	6415.67	-884.667	0.0853858	0.82713	0.0457255	0.862549	0.0396603	-0.0354194	374.528	143.683	56	70	0.5	105	17032.5	NA	NA	NA	NA	NA	1.8	5.9	2.8	4.2	NA	0.9	0.8	1.7	NA	NA	0	96	235	139	144.792
EE1DCD2FC9	YK1346	79483_2	79364_1	M	HIGH FAT	2022-06-04	1	12	32207	11673	20534	5977.5	2677.33	3300.17	0.22892	0.725386	0.0719472	0.853366	0.156973	-0.127981	1260.92	263.577	92	72	1.7	98	18705	70	79	56	34	0	2.1	9.4	17.1	14.7	5.5	1.1	1.2	2.3	1.3	1	1	163	449	286	175.46
EE1DCD2FCA	YK1359	78830_2	78772_1	F	LOW FAT	2022-06-11	6	2	49745	19356	30389	6963	5433.33	1529.67	0.0703101	0.845891	0.0490526	0.853719	0.0212574	-0.00782783	159.514	79.3925	67	74	NA	76	28230	63	106	56	33	0	1.8	5.1	1.2	2.6	NA	0.8	0.8	1.6	NA	NA	0	107	198	91	85.0467
EE1DCD2FCB	YK1331	79351_2	79444_1	F	LOW FAT	2022-05-27	1	8	NA	NA	NA	NA	NA	NA	0.0869457	0.827969	0.059127	0.85381	0.0278188	-0.0258405	276.376	148.206	89	82	0.333333	90	13852.5	NA	NA	NA	NA	NA	1.8	5.9	2.3	3.6	1.2	0.8	0.8	1.6	0.8	0.6	0	98	228	130	132.653
EE1DCD2FCC	YK1352	79520_2	79338_1	M	LOW FAT	2022-06-05	1	7	34308	14559	19749	5301	3673.33	1627.67	0.122562	0.817137	0.0567192	0.855118	0.0658429	-0.0379816	539.75	182.913	108	107	1.9	96	16312.5	104	332	56	35	0	1.9	11.5	9	9.1	5	1.2	1.1	2.3	1.2	1.4	2	146	403	257	176.027
EE1DCD2FCD	YK1337	79371_2	79350_1	F	LOW FAT	2022-05-29	1	12	42506	17026	25480	5893	5403	490	0.0471007	0.860174	0.0724359	0.943462	-0.0253352	-0.0832879	20.0442	68.3177	74	76	NA	83	14655	NA	NA	NA	NA	NA	1.7	5.2	1.3	2.2	1.1	0.6	0.7	1.3	0.9	0.7	0	106	213	107	100.943
EE1DCD2FCE	YK1325	78744_2	79129_1	F	LOW FAT	2022-05-25	3	6	60412	24946	35466	8691.5	7583	1108.5	0.0758083	0.847625	0.0595016	0.854268	0.0163067	-0.00664273	177.435	116.064	79	85	NA	74	17625	47	57	52	30	0	2.1	6.6	2.8	3.4	2.2	1	1.1	2.1	1	0.6	1	127	252	125	98.4252
EE1DCD2FCF	YK1355	79451_2	79410_1	F	LOW FAT	2022-06-05	1	10	NA	NA	NA	NA	NA	NA	0.0308144	0.868409	0.0469097	0.855625	-0.0160953	0.0127841	20.4293	86.0726	70	68	0.3	52	14895	NA	NA	NA	NA	NA	1.7	5.7	0.9	2.3	1.2	0.7	0.6	1.3	0.7	1.1	0	104	198	94	90.3846
EE1DCD2FD0	YK1363	79737_2	79353_1	F	HIGH FAT	2022-06-11	1	12	41953	17072	24881	5786	5020.33	765.667	0.111825	0.812941	0.0912538	0.822049	0.0205712	-0.00910775	148.458	100.506	54	67	0.533333	80	16350	65	53	57	24	0	1.8	5.7	5	3.6	NA	0.9	0.9	1.8	NA	NA	0	123	251	128	104.065
EE1DCD2FD1	YK1303	78791_2	78767_1	F	HIGH FAT	2022-05-10	6	8	50082	23550	26532	6707.5	5995.33	712.167	0.106773	0.817924	0.051761	0.864906	0.0550117	-0.0469814	328.129	96.2733	60	62	0.266667	91	16530	NA	NA	NA	NA	NA	1.8	6.1	3.9	5.1	0.7	0.9	0.9	1.8	1.1	1.1	0	120	238	118	98.3333
EE1DCD2FD2	YK1342	78698_2	79130_1	M	LOW FAT	2022-06-01	2	12	39010	13813	25197	5619.5	4718	901.5	0.0712644	0.86	0.0448148	0.85213	0.0264496	0.00787037	412.397	225.198	102	112	0.8	93	15525	78	74	81	38	0	2.3	10.8	5.4	3.1	3.2	1.3	1.4	2.7	1.2	1.2	0	112	389	277	247.321
EE1DCD2FD3	YK1298	78787_2	78710_1	M	HIGH FAT	2022-05-08	4	9	25063	9708	15355	5917	349	5568	0.153343	0.796751	0.0733827	0.835259	0.07996	-0.0385081	449.495	150.84	67	67	2.4	96	15000	NA	NA	NA	NA	NA	1.9	9.4	8.8	7.2	2.7	1.2	1.1	2.3	1.2	1	0	150	385	235	156.667
EE1DCD2FD4	YK1318	78124_2	78047_1	M	LOW FAT	2022-05-17	10	3	NA	NA	NA	NA	NA	NA	0.0837902	0.849481	0.0358635	0.878474	0.0479268	-0.0289931	803.583	273.983	106	104	1	90	18870	NA	NA	NA	NA	NA	1.7	10.1	5.8	3.7	NA	1.2	1.1	2.3	NA	NA	0	106	349	243	229.245
EE1DCD2FD5	YK1315	78069_2	78157_1	F	HIGH FAT	2022-05-16	10	7	44931	19962	24969	5365	6306	-941	0.146	0.7844	0.0517117	0.855465	0.0942883	-0.0710655	535.889	106.515	67	70	0.166667	93	18607.5	NA	NA	NA	NA	NA	2	7.7	5.8	6.8	NA	1.7	NA	NA	NA	NA	0	126	280	154	122.222
EE1DCD2FD6	YK1309	78853_2	79125_1	F	LOW FAT	2022-05-12	3	5	67530	21004	46526	10075.5	8876.67	1198.83	0.0856609	0.827486	0.104444	0.807288	-0.0187835	0.0201981	86.5457	133.142	78	108	0.433333	86	15150	NA	NA	NA	NA	NA	1.9	8.8	2.5	4.8	2.4	1.1	1.1	2.2	1.1	1.4	1	115	270	155	134.783
EE1DCD2FD7	YK1310	78133_2	78106_1	M	HIGH FAT	2022-05-18	10	7	NA	NA	NA	NA	NA	NA	0.124415	0.81972	0.0405217	0.85629	0.0838933	-0.0365695	1109.44	277.09	86	80	2.8	96	16342.5	NA	NA	NA	NA	NA	2.2	12.6	13.7	7.8	NA	1.3	1.3	2.6	NA	NA	1	135	483	348	257.778
EE1DCD2FD8	YK1345	78829_2	78739_1	F	HIGH FAT	2022-06-01	6	14	41469	17081	24388	5290.5	5423.67	-133.167	0.118851	0.806307	0.0510159	0.832762	0.0678347	-0.0264544	414.748	113.933	86	72	0.111667	81	14970	48	60	60	32	0	1.9	6.4	3	6.4	1.6	0.8	0.8	1.6	0.9	1.4	0	102	259	157	153.922
EE1DCD2FD9	YK1332	79366_2	79455_1	M	HIGH FAT	2022-05-27	1	9	40892	14523	26369	5775.5	4206.67	1568.83	0.161266	0.780343	0.0548113	0.851352	0.106455	-0.071009	1112.97	277.878	116	88	NA	102	22657.5	72	98	58	50	0	2.3	12.1	14.5	10.7	6.7	1.5	1.4	2.9	1.3	1.7	3	132	465	333	252.273
EE1DCD2FDA	YK1370	79128_2	79019_1	M	HIGH FAT	2022-06-18	1	12	31993	12370	19623	4979	3709.67	1269.33	0.0961981	0.844492	0.046821	0.85929	0.0493771	-0.0147985	617.205	243.062	79	79	1.2	101	16350	NA	NA	NA	NA	NA	2	10.9	10.1	8.3	NA	1.4	1.4	2.8	NA	NA	2	123	403	280	227.642
EE1DCD2FDB	YK1339	79411_2	79498_1	F	HIGH FAT	2022-05-29	1	10	61376	26337	35039	8214	7548.67	665.333	0.102699	0.822007	0.0549735	0.851005	0.0477254	-0.0289984	328.489	121.549	74	52	1.05	95	16792.5	64	59	63	24	0	1.9	7.7	2.2	3.3	1.6	1	0.9	1.9	0.9	1.4	0	123	283	160	130.081
EE1DCD2FDC	YK1327	78856_2	78734_1	F	HIGH FAT	2022-05-26	6	14	60277	27701	32576	9582.5	7124	2458.5	0.103948	0.819467	0.0545726	0.853675	0.0493754	-0.034208	495.85	200.285	78	70	0.539	89	16297.5	72	53	71	46	0	1.7	6.7	3.9	6.3	2.9	0.8	0.8	1.6	1	1.1	0	94	261	167	177.66
EE1DCD2FDD	YK1377	79126_2	78803_1	F	HIGH FAT	2022-06-20	1	14	51818	19003	32815	6335	6748.33	-413.333	0.0387678	0.875608	0.0616667	0.855659	-0.0228989	0.0199493	54.2426	151.069	54	85	0.2	93	19927.5	68	41	55	33	0	2	6.4	2.1	3.5	NA	0.9	0.9	1.8	NA	NA	0	99	240	141	142.424
EE1DCD2FDE	YK1314	78069_2	78157_1	M	LOW FAT	2022-05-16	10	7	27920	12611	15309	4588.5	2823.67	1764.83	0.143977	0.796817	0.0435185	0.863889	0.100459	-0.0670723	892.523	176.708	111	88	2.6	101	16500	NA	NA	NA	NA	NA	2	11.8	8.3	10.6	NA	1.4	1.4	2.8	NA	NA	0	146	401	255	174.658
EE1DCD2FDF	YK1389	79350_2	79415_1	F	HIGH FAT	2022-06-27	2	10	52813	19959	32854	7314	6996	318	0.0919651	0.816638	0.0660185	0.836204	0.0259465	-0.0195661	195.372	107.076	59	62	0.333333	95	19582.5	NA	NA	NA	NA	NA	2	7.3	2.8	5.1	1.3	0.9	0.9	1.8	0.8	1	0	118	253	135	114.407
EE1DCD2FE0	YK1312	78185_2	78151_1	M	HIGH FAT	2022-05-14	10	10	42100	10716	31384	6483	5138	1345	0.11425	0.818684	0.0484466	0.852298	0.0658037	-0.0336138	607.482	188.168	78	60	1.8	88	16605	NA	NA	NA	NA	NA	2	7.9	6.4	4.8	NA	1	1	2	NA	NA	0	115	332	217	188.696
EE1DCD2FE2	YK1317	78415_2	78062_1	F	HIGH FAT	2022-05-16	8	7	47342	20333	27009	6338.5	5851.33	487.167	0.038552	0.87991	0.0593464	0.848039	-0.0207944	0.0318703	40.7489	124.809	54	56	NA	82	14737.5	NA	NA	NA	NA	NA	1.8	5.7	1.3	2.4	NA	0.8	0.8	1.6	NA	NA	0	113	240	127	112.389
EE1DCD2FE3	YK1372	79347_2	79448_1	M	HIGH FAT	2022-06-19	2	12	38813	14405	24408	5628	4438.33	1189.67	0.130776	0.793938	0.0410394	0.873835	0.0897368	-0.0798968	900.524	185.271	77	78	0.9	74	14902.5	NA	NA	NA	NA	NA	1.8	9.8	6.8	7.9	NA	1.1	1.1	2.2	NA	NA	3	106	336	230	216.981
EE1DCD2FE4	Yk1313	78185_2	78151_1	F	LOW FAT	2022-05-14	10	10	55774	21973	33801	6829.5	7686	-856.5	0.0631754	0.847093	0.0429293	0.852357	0.0202461	-0.0052637	213.647	111.815	79	77	NA	72	15802.5	NA	NA	NA	NA	NA	1.9	6.3	2.5	2.9	NA	0.8	0.7	1.5	NA	NA	0	115	239	124	107.826
EE1DCD2FE5	YK1300	78999_2	79037_1	M	HIGH FAT	2022-05-09	3	12	38840	13307	25533	6252.5	4510.33	1742.17	0.197081	0.74057	0.0598425	0.848766	0.137239	-0.108196	900.965	165.193	57	56	1.1	89	12142.5	NA	NA	NA	NA	NA	2.1	9.3	11.9	9.9	4.8	1.2	1.3	2.5	1.3	1	2	142	402	260	183.099
EE1DCD2FE6	YK1390	79415_2	79363_1	M	LOW FAT	2022-06-27	2	9	34872	14860	20012	5086.5	3936.67	1149.83	0.156667	0.773857	0.072956	0.850031	0.0837107	-0.0761749	596.897	195.446	88	80	1.7	88	16770	NA	NA	NA	NA	NA	2	8.8	10.4	8.9	2.9	1.1	1	2.1	12.2	0.9	1	125	355	230	184
EE1DCD2FE7	YK1333	79366_2	79455_1	F	LOW FAT	2022-05-27	1	9	NA	NA	NA	NA	NA	NA	0.08724	0.821733	0.035068	0.873639	0.052172	-0.0519061	534.627	139.945	79	87	NA	76	13200	NA	NA	NA	NA	NA	2.3	7.5	1.9	6.6	3.2	1	1.1	2.1	0.8	1.2	1	115	284	169	146.957
EE1DCD2FE8	YK1336	79371_2	79350_1	M	HIGH FAT	2022-05-29	1	12	35755	15593	20162	4918.5	4473.33	445.167	0.146404	0.793158	0.0502133	0.854827	0.0961902	-0.0616688	697.716	153.862	85	92	1.3	100	17775	87	84	64	41	0	2.1	9.1	8.7	8.6	7.8	1.2	1	2.2	1.3	1.3	1	130	365	235	180.769
EE1DCD2FE9	YK1369	78801_2	79131_1	F	HIGH FAT	2022-06-13	3	5	39660	16766	22894	6012	4635	1377	0.12485	0.798167	0.0833013	0.836955	0.0415486	-0.0387877	204.078	93.4822	61	60	0.35	78	19530	100	88	56	46	0	1.8	6.4	3.4	6.7	NA	0.8	0.8	1.6	NA	NA	0	119	240	121	101.681
EE1DCD2FEA	YK1365	79767_2	79555_1	F	HIGH FAT	2022-06-12	1	14	NA	NA	NA	NA	NA	NA	0.066715	0.857021	0.0480272	0.838027	0.0186878	0.0189937	193.414	116.012	67	66	0.233333	81	16237.5	54	42	71	55	0	2	6	1.9	2	NA	0.8	0.8	1.6	NA	NA	2	110	235	125	113.636
EE1DCD2FEB	YK1344	79498_2	79443_1	M	LOW FAT	2022-06-02	1	8	52848	21992	30856	7549.5	6716	833.5	0.119227	0.823653	0.0450997	0.863704	0.074127	-0.0400504	747.315	205.65	134	105	1.4	75	14767.5	83	144	47	32	0	2	11.9	9.5	4.6	3.6	1.6	1.3	2.9	1.2	1.1	1	122	408	286	234.426
EE1DCD2FEC	YK1347	79483_2	79364_1	F	LOW FAT	2022-06-04	1	12	47004	20003	27001	6897.5	5220	1677.5	0.0540986	0.863503	0.0660177	0.842035	-0.0119191	0.021468	42.1358	77.8735	61	73	0.333333	101	16365	47	61	62	31	0	2	5.7	2.4	6.1	2.3	0.8	0.9	1.7	0.8	1.3	0	123	227	104	84.5528
EE1DCD2FED	YK1335	79443_2	79349_1	F	LOW FAT	2022-05-29	1	10	NA	NA	NA	NA	NA	NA	0.0819497	0.833475	0.0452707	0.750427	0.036679	0.0830475	228.005	101.249	81	80	0.433333	100	16252.5	88	52	61	36	NA	1.9	5.3	2.5	2.6	1.2	0.7	0.7	1.4	0.8	0.9	0	118	230	112	94.9153
EE1DCD2FEE	YK1334	79443_2	79349_1	M	HIGH FAT	2022-05-29	1	10	31951	15680	16271	4097	4189	-92	0.220219	0.725809	0.0675177	0.861064	0.152701	-0.135255	781.338	127.768	53	54	1.1	104	17902.5	NA	NA	NA	NA	NA	1.9	8.3	15.9	9.7	5.2	1	1	2	1	1.5	2	146	391	245	167.808
EE1DCD2FEF	YK1378	78785_2	78705_1	M	HIGH FAT	2022-06-20	7	8	33357	14394	18963	4299.5	4046.33	253.167	0.100901	0.836373	0.0366391	0.878567	0.0642623	-0.0421943	623.759	150.188	72	64	1.4	101	17220	67	78	55	41	0	2.1	7.9	7.3	5.1	NA	NA	1.9	NA	NA	NA	2	135	337	202	149.63
EE1DCD2FF0	YK1301	78999_2	79037_1	F	LOW FAT	2022-05-09	3	12	48515	18408	30107	6653.5	6152.33	501.167	0.0574688	0.853565	0.0778218	0.820429	-0.020353	0.033136	36.726	92.6264	68	54	0.233333	69	10485	NA	NA	NA	NA	NA	1.7	5.8	1.6	2.9	1.3	0.7	0.7	1.4	0.8	0.9	0	106	213	107	100.943
EE1DCD2FF1	YK1343	78698_2	79130_1	F	HIGH FAT	2022-06-01	2	12	NA	NA	NA	NA	NA	NA	0.175378	0.741036	0.0530693	0.852772	0.122309	-0.111736	678.731	104.768	49	79	0.6	88	19650	NA	NA	NA	NA	NA	1.9	7.2	4.4	7.9	3	0.9	0.8	1.7	1	1.2	0	104	248	144	138.462
EE1DCD2FF2	YK1305	79132_2	79111_1	F	HIGH FAT	2022-05-10	4	12	69969	26168	43801	11145	8325	2820	0.120569	0.800472	0.0612245	0.83881	0.059345	-0.0383373	382.278	133.705	57	72	NA	81	20685	NA	NA	NA	NA	NA	2	7.4	6.7	7	2.2	1.1	1.1	2.2	1.1	1.2	0	115	269	154	133.913
EE1DCD2FF3	YK1375	79372_2	79446_1	F	HIGH FAT	2022-06-19	2	13	44560	19023	25537	6265	6067.33	197.667	0.144126	0.77236	0.0674713	0.843218	0.0766549	-0.070858	354.231	94.7746	51	63	0.4	96	16327.5	68	66	61	48	0	1.8	5.9	3.6	4.9	NA	0.7	0.8	1.5	NA	NA	0	98	205	107	109.184
EE1DCD2FF4	YK1386	79456_2	79463_1	M	LOW FAT	2022-06-27	1	10	39705	19336	20369	6511	4635	1876	0.0793076	0.853254	0.0445723	0.87885	0.0347353	-0.0255954	430.642	189.545	85	85	0.6	93	17235	NA	NA	NA	NA	NA	1.8	8.8	6	5.9	2.1	1.1	1.1	2.2	1.1	0.8	0	135	367	232	171.852
EE1DCD2FF5	YK1357	79519_2	79480_1	F	LOW FAT	2022-06-05	1	12	46907	20627	26280	6342.5	6052.33	290.167	0.0929825	0.829968	0.0868367	0.823844	0.00614572	0.00612456	128.359	114.851	74	80	0.486	73	13882.5	NA	NA	NA	NA	NA	1.8	6.2	2.5	6.8	3	0.8	0.8	1.6	0.9	1.3	0	110	244	134	121.818
EE1DCD2FF6	YK1340	79367_2	79440_1	M	LOW FAT	2022-05-29	1	10	42269	12834	29435	6768	4988	1780	0.152443	0.78277	0.0433333	0.862742	0.10911	-0.0799721	815.657	136.157	70	50	2.1	106	17362.5	119	134	342	397	0	2	9.9	7.4	4.8	4.3	1.2	1.3	2.5	1.3	1.4	1	148	374	226	152.703
EE1DCD2FF7	YK1316	78415_2	78062_1	M	LOW FAT	2022-05-16	8	7	32725	12173	20552	5182	3642	1540	0.151446	0.785482	0.0544715	0.848157	0.0969745	-0.0626752	822.239	207.196	108	102	1.9	99	19357.5	NA	NA	NA	NA	NA	2	13.3	12.8	7.4	NA	1.3	1.2	2.5	NA	NA	2	145	428	283	195.172
EE1DCD2FF8	YK1328	79346_2	79604_1	M	LOW FAT	2022-05-27	1	11	32634	13026	19608	4712	3712.33	999.667	0.144714	0.801699	0.0544237	0.851402	0.0902904	-0.0497025	913.91	259.049	129	106	0.5	104	20107.5	125	197	383	283	0	1.9	12.1	11	6.1	3.6	1.2	1.3	2.5	1.1	0.9	3	126	430	304	241.27
EE1DCD2FF9	YK1356	79519_2	79480_1	M	HIGH FAT	2022-06-05	1	12	44031	15267	28764	6029	5659.67	369.333	0.19231	0.751504	0.0719253	0.842615	0.120384	-0.0911113	748.222	182.938	91	96	2.1	93	16485	72	93	63	53	0	1.9	8.6	11.2	18.4	4.3	1	1	2	1.3	0.9	1	134	403	269	200.746
EE1DCD2FFB	YK1326	79354_2	79665_1	M	LOW FAT	2022-05-26	1	5	38240	10580	27660	5639	4905.33	733.667	0.156905	0.771917	0.0573563	0.865479	0.0995484	-0.0935623	780.428	187.047	91	66	2	87	14310	NA	NA	NA	NA	NA	1.9	7.1	5.4	3.7	2.6	1	1	2	1.3	1	2	105	307	202	192.381
EE1DCD2FFC	YK1320	78803_2	78775_1	M	LOW FAT	2022-05-17	6	13	46798	14672	32126	6485.5	5542.67	942.833	0.104737	0.830123	0.0421277	0.867908	0.0626092	-0.037785	905.051	286.656	120	110	NA	73	14032.5	NA	NA	NA	NA	NA	1.9	13	7.2	6.4	NA	1.3	1.4	2.7	NA	NA	0	114	401	287	251.754
EE1DCD2FFD	YK1349	79485_2	79445_1	F	LOW FAT	2022-06-04	1	12	58214	21627	36587	8405	7262.33	1142.67	0.122052	0.795124	0.0539881	0.851548	0.0680643	-0.0564239	362.238	90.9164	86	82	0.333333	92	14130	79	89	50	30	0	1.9	8.2	3.3	7.8	2.3	0.9	0.9	1.8	1.1	1	1	122	250	128	104.918
EE1DCD2FFE	YK1486	79847_2	79449_1	M	LOW FAT	2022-08-25	3	11	NA	NA	NA	NA	NA	NA	0.0703514	0.870027	0.0657388	0.85244	0.00461252	0.0175872	308.207	289.313	111	111	1	83	16200	75	82	50	29	0	2.1	10.5	6.6	4.7	3.1	1.2	1.3	2.5	1.7	1.6	0	119	405	286	240.336
EE1DCD2FFF	YK1319	78124_2	78047_1	F	HIGH FAT	2022-05-17	10	3	NA	NA	NA	NA	NA	NA	0.144459	0.782652	0.0354167	0.881083	0.109043	-0.0984315	1047.18	149.83	67	45	0.866667	111	19057.5	NA	NA	NA	NA	NA	1.7	6.7	2.1	4.7	NA	0.8	0.8	1.6	NA	NA	0	96	230	134	139.583
EE1DCD3000	YK1348	79485_2	79445_1	M	HIGH FAT	2022-06-04	1	12	48723	16602	32121	7123.5	6244.33	879.167	0.171277	0.765082	0.036891	0.874327	0.134386	-0.109245	1542.83	209.634	75	66	1.1	97	17295	102	164	61	40	0	2	8.9	11.7	8.4	5.3	1.1	1.2	2.3	1.3	0.9	1	113	386	273	241.593
EE1DCD3001	YK1382	79369_2	79454_1	M	HIGH FAT	2022-06-26	2	13	NA	NA	NA	NA	NA	NA	0.221931	0.722597	0.0547386	0.859804	0.167192	-0.137207	1430.33	217.218	81	67	3.1	95	19972.5	NA	NA	NA	NA	NA	2	11	13.6	11	6.7	1.3	1.2	2.5	1.3	1.6	3	119	399	280	235.294
EE1DCD3002	YK1366	79752_2	79484_1	M	LOW FAT	2022-06-12	1	10	37221	12347	24874	5031	4787	244	0.162779	0.765996	0.0589487	0.862256	0.103831	-0.0962603	628.578	134.391	73	86	NA	91	12435	120	241	79	44	NA	1.8	12.4	10.2	10.1	NA	1.1	1.3	2.4	NA	NA	0	150	366	216	144
EE1DCD3003	YK1381	79354_2	79665_1	F	LOW FAT	2022-06-22	1	8	30682	14472	16210	5197	3077	2120	0.0811754	0.811193	0.044932	0.72602	0.0362435	0.0851726	250.265	116.622	50	64	0.6	86	13687.5	80	64	50	41	0	1.8	5.8	1.5	3	NA	0.8	0.9	1.7	NA	NA	0	99	205	106	107.071
EE1DCD3004	YK1302	78791_2	78767_1	M	LOW FAT	2022-05-10	6	8	31489	11734	19755	4510.5	4105.67	404.833	0.129406	0.808741	0.0700542	0.847669	0.0593518	-0.0389282	464.681	191.653	110	105	2.2	86	16065	NA	NA	NA	NA	NA	2	11.1	8.1	8.1	3.4	1.2	1.2	2.4	1.3	1.9	2	140	412	272	194.286
EE1DCD3005	YK1383	79369_2	79454_1	F	LOW FAT	2022-06-26	2	13	44331	17331	27000	6387.5	5795	592.5	0.0324956	0.887906	0.0633333	0.845152	-0.0308377	0.0427542	11.3636	128.025	67	78	NA	90	13012.5	NA	NA	NA	NA	NA	1.7	6.8	1.8	2.4	1.6	0.6	0.7	1.3	1	1	2	96	228	132	137.5
EE1DCD3006	YK1351	79402_2	79451_1	F	HIGH FAT	2022-06-05	1	11	39980	16925	23055	5139	5207	-68	0.0205556	0.897813	0.0694933	0.835493	-0.0489378	0.0623192	-54.5664	65.057	52	62	NA	90	17017.5	60	44	56	34	0	1.9	6	0.9	1.6	0.9	0.7	0.8	1.5	0.9	0.8	0	142	228	86	60.5634
EE1DCD3008	YK1353	79520_2	79338_1	F	HIGH FAT	2022-06-05	1	7	39055	16658	22397	5766	4747.67	1018.33	0.128099	0.783713	0.0674101	0.855995	0.0606893	-0.0722818	211.704	50.1779	54	76	0.466667	98	14932.5	63	38	50	41	0	1.8	5.6	6.3	8.3	3.2	0.8	0.8	1.6	1	0.8	0	116	256	140	120.69
EE1DCD3009	YK1388	79350_2	79415_1	M	LOW FAT	2022-06-27	2	10	NA	NA	NA	NA	NA	NA	0.148841	0.781049	0.0890936	0.826696	0.0597475	-0.0456473	342.566	150.285	82	90	1.4	90	16387.5	NA	NA	NA	NA	NA	1.8	9	9.1	6.9	3.6	1.2	1.1	2.3	1.1	0.7	1	131	331	200	152.672
EE1DCD300A	YK1385	79365_2	79371_1	F	LOW FAT	2022-06-26	2	13	NA	NA	NA	NA	NA	NA	0.0483007	0.859379	0.0537143	0.865079	-0.00541363	-0.00570028	74.7045	93.0055	64	52	NA	87	15390	NA	NA	NA	NA	NA	2	6	1.8	2.8	0.7	0.8	0.8	1.6	1.2	1.3	0	112	201	89	79.4643
EE1DCD300B	YK1393	79410_2	79499_1	F	HIGH FAT	2022-06-27	1	9	47310	18770	28540	7138.5	6385.67	752.833	0.0691099	0.83377	0.0708614	0.83573	-0.00175148	-0.0019607	109.302	114.103	61	53	0.4	96	20100	NA	NA	NA	NA	NA	1.9	5.4	3.2	2.8	0.9	0.7	0.8	1.5	0.7	1.2	0	98	206	108	110.204
EE1DCD300C	YK1323	78119_2	78153_1	F	LOW FAT	2022-05-21	10	9	48698	22406	26292	6803.5	5464.67	1338.83	0.0668182	0.852256	0.0618596	0.845825	0.00495853	0.00643133	125.128	110.006	72	56	NA	91	15780	NA	NA	NA	NA	NA	1.8	4.5	1.8	2.9	1.2	1.7	0.7	2.4	0.9	0.4	1	106	212	106	100
EE1DCD300D	YK1376	79126_2	78803_1	M	LOW FAT	2022-06-20	1	14	30245	9964	20281	3950	3919	31	0.137787	1.17035	0.0424823	0.807908	0.0953047	0.362438	731.553	271.4	102	93	1.4	83	12795	76	217	50	32	0	2.1	10.5	5.7	4.1	NA	1.1	1.2	2.3	NA	NA	0	108	372	264	244.444
EE1DCD300E	YK1360	79133_2	78701_1	M	HIGH FAT	2022-06-11	2	8	38744	12938	25806	5633	4430	1203	0.0596777	0.880064	0.0457552	0.872995	0.0139225	0.00706967	268.867	185.103	87	72	0.8	79	14370	70	83	59	48	0	2.1	10.2	5.3	4.4	NA	1.3	1.2	2.5	NA	NA	3	146	372	226	154.795
EE1DCD300F	YK1354	79451_2	79410_1	M	HIGH FAT	2022-06-05	1	10	38150	12447	25703	5805	4587.33	1217.67	0.104082	0.843427	0.0497521	0.86135	0.0543296	-0.017923	577.741	217.226	77	68	0.4	108	17325	NA	NA	NA	NA	NA	2	10.1	8.5	5.6	3.8	1.2	1.1	2.3	1.3	1	2	136	421	285	209.559
EE1DCD3010	YK1330	79351_2	79444_1	M	HIGH FAT	2022-05-27	1	8	44456	16456	28000	5986.5	5297.67	688.833	0.208678	0.729238	0.0572289	0.849558	0.151449	-0.12032	1494.74	275.409	72	53	0.5	105	20265	NA	NA	NA	NA	NA	1.9	8.9	11.7	7.2	3.5	1	1	2	1.2	1.5	2	103	377	274	266.019
EE1DCD3011	YK1329	79346_2	79604_1	F	HIGH FAT	2022-05-27	1	11	56210	25396	30814	7344	7068.67	275.333	0.0775309	0.832361	0.0452778	0.868968	0.0322531	-0.0366071	340.316	146.31	65	71	NA	86	14775	51	49	64	35	0	1.6	7	2.7	3.7	1.6	0.9	0.9	1.8	0.8	1.3	0	99	253	154	155.556
EE1DCD3012	YK1304	79132_2	79111_1	M	LOW FAT	2022-05-10	4	12	43600	17815	25785	5686.5	5523.67	162.833	0.190526	0.745965	0.078	0.944333	0.112526	-0.198368	786.014	186.532	104	79	2.3	93	17452.5	NA	NA	NA	NA	NA	2.2	12.5	14.7	11.5	4.4	1.3	1.3	2.6	1.3	2.1	0	126	419	293	232.54
EE1DCD3013	YK1374	79372_2	79446_1	M	LOW FAT	2022-06-19	2	13	NA	NA	NA	NA	NA	NA	0.0937179	0.82041	0.0416479	0.907004	0.05207	-0.0865935	557.374	164.244	59	54	0.9	105	16282.5	NA	NA	NA	NA	NA	2	7.9	2.8	4.4	NA	1.4	NA	NA	NA	NA	3	115	278	163	141.739
EE1DCD3014	YK1322	78119_2	78153_1	M	HIGH FAT	2022-05-21	10	9	30008	12786	17222	4032.5	3776.67	255.833	0.141383	0.799631	0.0592204	0.855672	0.0821627	-0.0560415	647.027	192.41	82	72	1.5	115	20535	73	96	57	41	0	2.1	10.1	12.2	9.2	3.4	1.2	1.1	2.3	1.2	1.8	1	145	407	262	180.69
EE1DCD3015	YK1387	79456_2	79463_1	F	HIGH FAT	2022-06-27	1	10	51623	24307	27316	7707.5	6573.33	1134.17	0.0305155	0.880687	0.046337	0.857949	-0.0158215	0.0227386	40.3953	118.837	55	60	NA	84	14415	NA	NA	NA	NA	NA	1.7	5.3	1	2.7	1.3	0.7	0.6	1.3	0.7	1.1	0	103	219	116	112.621
[truncated: 534 more rows]

## Sheet: Supp Table 3 PhenGen Corr MLFD
Supplement Table 3. Heritability (diagonal), genetic correlation (lower diagonal) and phenotypic (upper diagonal) correlations between physiological traits in males on low fat diet
[truncated: 32 more rows]

[truncated: 16 more sheets: Supp Table 4 PhenGen Corr MHFD, Supp Table 5 PhenGen Corr FLFD, Supp Table 6 PhenGen Corr FHFD, Supp Table 7 DE genes, Supp Table 8 KEGG pathways Full, Supp Table 9 KEGG pathways fema, Sup Table 10 KEGG pathways male, SupT11 hypothalamic ciseQTL, SupT12 diet specific ciseQTL, SupT13 genes in pQTL ful, SupT14 genes in pQTL diet, SupT15 list of gene in pQTL sex, Sup16 Trait Expr Corr Full, Sup17 Trait Expr Corr Diet, Sup18 Trait Expr Corr Sex, SupT19 Bmediator]
