# Supplementary material for: Identification of novel candidate neural genes for diet-induced obesity in outbred heterogeneous stock rats
Source: Research Square preprint supplement (doi:10.21203/rs.3.rs-9695368/v1), 2026-05-22
Supplement: Supplementary file 1 [file dc4978205c13c1af8ea95034.docx]

**Table 3. Phenotypic QTL in the full dataset**

| **Trait** | **Peak SNP (Chr_Mb)** | **Start (Mb)** | **End (Mb)** | **Size (Mb)** | **logP** | **thres90** | **thres95** | **SDP (**ACI, BN, BUF, F344, M520, MR, WKY, WN) |
| --- | --- | --- | --- | --- | --- | --- | --- | --- |
| **Activity_Dark** | **chr1_141239990** | **141.24** | **142.88** | **1.64** | **5.32** | **5.2** | **5.55** | **GGAAAAAA** |
| **Activity_Light** | **chr1_141396968** | **141.24** | **142.88** | **1.64** | **6.3** | **5.24** | **5.59** | **GGCGGCCC** |
| BUN/Cre | chr1_170696889 | 169.17 | 172.3 | 3.13 | 5.51 | 5.21 | 5.55 | CGCCGGGG |
| **FatMass** | **chr1_201383401** | **199.4** | **204.53** | **5.13** | **6.31** | **5.16** | **5.51** | **CTTCTTTC** |
| **LeanMass** | **chr1_201383401** | **199.4** | **204.53** | **5.13** | **8.34** | **5.2** | **5.51** | **CTTCTTTC** |
| GluAUC | chr1_258917439 | 258.53 | 260.52 | 1.99 | 5.33 | 5.26 | 5.58 | CCTCCTTT |
| BWDelta | chr1_258949393 | 258.53 | 259.99 | 1.46 | 8.16 | 5.17 | 5.49 | CCTCCCTC |
| Food@11wks | chr1_259412086 | 258.53 | 259.99 | 1.46 | 6.4 | 5.17 | 5.51 | CCACCCAC |
| CHOL | chr1_259458680 | 258.53 | 259.99 | 1.46 | 8.32 | 5.25 | 5.6 | GGCGGGCG |
| FatMassDelta | chr1_259512337 | 258.53 | 260.11 | 1.58 | 19.83 | 5.15 | 5.45 | CCTCCCTC |
| %FatMassDelta | chr1_259512337 | 258.53 | 260.11 | 1.58 | 21.28 | 5.11 | 5.41 | CCTCCCTC |
| LeanMassDelta | chr1_259590720 | 258.53 | 260.11 | 1.58 | 16.65 | 5.24 | 5.63 | GGAGGGAG |
| Brain/BW | chr1_259628230 | 258.53 | 260.52 | 1.99 | 6.48 | 5.19 | 5.53 | AACAAACA |
| GonadalFat/BW | chr1_259628230 | 258.53 | 260.52 | 1.99 | 13.46 | 5.22 | 5.53 | AACAAACA |
| GonadalFat | chr1_259628230 | 258.53 | 260.52 | 1.99 | 13.97 | 5.22 | 5.52 | AACAAACA |
| FatMass | chr1_259628230 | 258.53 | 260.52 | 1.99 | 19.06 | 5.16 | 5.51 | AACAAACA |
| LeanMass | chr1_259628230 | 258.53 | 260.52 | 1.99 | 19.23 | 5.2 | 5.51 | AACAAACA |
| OmenFat/BW | chr1_259628230 | 258.53 | 260.52 | 1.99 | 13.06 | 5.24 | 5.58 | AACAAACA |
| OmenFat | chr1_259628230 | 258.53 | 260.52 | 1.99 | 13.95 | 5.23 | 5.56 | AACAAACA |
| RetroFat/BW | chr1_259628230 | 258.53 | 260.52 | 1.99 | 12.4 | 5.19 | 5.51 | AACAAACA |
| RetroFat | chr1_259628230 | 258.53 | 260.52 | 1.99 | 13.6 | 5.18 | 5.48 | AACAAACA |
| BWDelta | chr1_259628230 | 258.53 | 260.52 | 1.99 | 9.56 | 5.17 | 5.47 | AACAAACA |
| BW | chr1_259628230 | 258.53 | 260.52 | 1.99 | 6.32 | 5.25 | 5.57 | AACAAACA |
| **CHOL** | **chr3_115212825** | **113.17** | **117.81** | **4.64** | **5.51** | **5.25** | **5.6** | **TATTTAAT** |
| FatMassYoung | chr3_127571364 | 126.61 | 129.72 | 3.11 | 5.3 | 5.26 | 5.6 | AGAAAGGA |
| **FattyLiver** | **chr5_131916208** | **131.78** | **132.38** | **0.6** | **5.63** | **5.35** | **5.69** | **CCTCTCTC** |
| RigKid | chr5_144437611 | 144.33 | 144.44 | 0.11 | 6.17 | 5.23 | 5.56 | ATTAATTT |
| **Heart** | **chr5_158831441** | **158.83** | **159.9** | **1.07** | **12.96** | **5.19** | **5.49** | **AAAAAACC** |
| **Heart/BW** | **chr5_159440267** | **158.83** | **160.37** | **1.54** | **13.55** | **5.1** | **5.39** | **CCCCCCTC** |
| CHOL | chr6_105123798 | 104.08 | 105.26 | 1.18 | 5.9 | 5.25 | 5.6 | GAAAAAGA |
| **%FatMassDelta** | **chr6_23493841** | **22.99** | **25.68** | **2.69** | **6.85** | **5.11** | **5.41** | **CAAAAACA** |
| TRIG | chr6_26268645 | 25.68 | 27.36 | 1.68 | 8.42 | 5.2 | 5.53 | TTTTTTAT |
| FatMassDelta | chr6_27013988 | 25.8 | 28.6 | 2.8 | 10.15 | 5.15 | 5.45 | GGGGGGTG |
| LeanMass | chr6_27013988 | 25.8 | 28.6 | 2.8 | 14.44 | 5.2 | 5.51 | GGGGGGTG |
| LeanMassDelta | chr6_27013988 | 25.8 | 28.6 | 2.8 | 7.38 | 5.24 | 5.63 | GGGGGGTG |
| GonadalFat/BW | chr6_27064422 | 25.8 | 27.36 | 1.56 | 8.41 | 5.22 | 5.53 | CCCCCCTC |
| GonadalFat | chr6_27064422 | 25.8 | 27.36 | 1.56 | 8.59 | 5.22 | 5.52 | CCCCCCTC |
| FatMass | chr6_27064422 | 25.8 | 28.52 | 2.71 | 16.83 | 5.16 | 5.51 | CCCCCCTC |
| FatMassYoung | chr6_27064422 | 25.8 | 28.52 | 2.71 | 7 | 5.26 | 5.6 | CCCCCCTC |
| OmenFat/BW | chr6_27064422 | 25.8 | 28.52 | 2.71 | 10.1 | 5.24 | 5.58 | CCCCCCTC |
| OmenFat | chr6_27064422 | 25.8 | 28.52 | 2.71 | 10.22 | 5.23 | 5.56 | CCCCCCTC |
| RetroFat/BW | chr6_27064422 | 25.8 | 27.36 | 1.56 | 12.23 | 5.19 | 5.51 | CCCCCCTC |
| RetroFat | chr6_27064422 | 25.8 | 28.52 | 2.71 | 12.03 | 5.18 | 5.48 | CCCCCCTC |
| CHOL | chr6_28466690 | 26.92 | 28.6 | 1.69 | 6.43 | 5.25 | 5.6 | CCCCCCAC |
| **LftKid** | **chr7_115463917** | **114.06** | **116.72** | **2.66** | **5.36** | **5.13** | **5.44** | **GCGGGGGG** |
| TRIG | chr8_46098223 | 45.31 | 46.93 | 1.62 | 5.94 | 5.2 | 5.53 | AATTATAT |
| **OmenFat/BW** | **chr9_703536** | **0.28** | **1.57** | **1.29** | **5.24** | **5.24** | **5.58** | **TTTTCTCT** |
| GonadalFat | chr10_60748234 | 56.67 | 64.65 | 7.98 | 5.99 | 5.22 | 5.52 | GGAGGAAA |
| **CHOL** | **chr12_31851338** | **30.96** | **32.36** | **1.4** | **10.18** | **5.25** | **5.6** | **CCCTCCCC** |
| OmenFat | chr18_26036249 | 25.72 | 26.16 | 0.44 | 5.38 | 5.23 | 5.56 | CTTTTCTC |
| BWDelta | chr18_26161137 | 25.72 | 26.16 | 0.44 | 5.31 | 5.17 | 5.49 | GTTTTGTG |
| Heart | chr18_26161137 | 25.72 | 26.16 | 0.44 | 5.95 | 5.19 | 5.49 | GTTTTGTG |
| **FatMassDelta** | **chr18_60349766** | **60.1** | **60.9** | **0.8** | **5.72** | **5.15** | **5.45** | **CAACCAAA** |
| Activity_Single | chr19_37309444 | 37.27 | 37.38 | 0.11 | 5.69 | 5.21 | 5.56 | GAGAAGGG |
| Activity_Total | chr19_37309444 | 37.27 | 37.38 | 0.11 | 5.78 | 5.21 | 5.56 | GAGAAGGG |
| **AST** | **chr20_47339404** | **47.34** | **48.13** | **0.79** | **5.67** | **5.21** | **5.53** | **GGAAAAGG** |
| CHOL | chr20_5711571 | 5.54 | 6.3 | 0.76 | 5.3 | 5.25 | 5.6 | TTCTTCCC |
| **Food@7wks** | **chrX_106232280** | **106.23** | **106.79** | **0.56** | **5.42** | **5.31** | **5.64** | **AGGAAGAA** |

Phenotype descriptions are provided in Supplementary Table 1. Separate QTL are distinguished by alternating bold vs regular type-face, allowing visualization of pleiotropic QTL. SDP: Strain Distribution Pattern using the following order: ACI, BN, BUF, F344, M520, MR, WKY, WN.

**Table 4. Diet-specific phenotypic QTL**

| **Trait and Diet condition** | **Peak SNP (Chr_Mb)** | **Start (Mb)** | **End (Mb)** | **Size (Mb)** | **logP** | **thresh90** | **thresh95** | **SDP** | **p-value - diet** | **p-value - SNP** | **p-value: diet x SNP interaction** |
| --- | --- | --- | --- | --- | --- | --- | --- | --- | --- | --- | --- |
| RigKid_HIGH.FAT | chr1_219.58 | 218.78 | 219.58 | 0.8 | 5.73 | 5.18 | 5.54 | AGGGGGAA | 0.00015 | 0.01295 | 0.00036 |
| **TRIG_LOW.FAT** | **chr1_258.95** | **258.53** | **259.99** | **1.46** | **6.6** | **5.13** | **5.44** | **CCTCCCTC** | **1.12E-39** | **2.01E-05** | **0.00198** |
| CHOL_HIGH.FAT | chr1_79.670 | 79.67 | 79.88 | 0.21 | 5.24 | 5.13 | 5.46 | GGGGGGGA | 0.00018 | 0.00067 | 0.03314 |
| **GonadalFat_HIGH.FAT** | **chr3_128.51** | **126.61** | **129.88** | **3.27** | **5.75** | **5.25** | **5.55** | **GTGGGTTG** | **9.28E-94** | **8.67E-05** | **0.02317** |
| ALT_HIGH.FAT | chr3_162.85 | 162.48 | 163.53 | 1.05 | 5.21 | 5.19 | 5.53 | TTTCCTCT | 2.74E-75 | 0.02185 | 9.79E-05 |
| **Activity_Light_LOW.FAT** | **chr4_153.33** | **153.07** | **153.81** | **0.75** | **5.33** | **5.19** | **5.49** | **TTTTATAT** | **0.29940** | **0.00025** | **0.007017** |
| Liver/BW_LOW.FAT | chr6_25.80 | 25.62 | 27.19 | 1.57 | 5.21 | 5.14 | 5.43 | AAAAAAGA | 5.48E-40 | 0.00290 | 0.000101 |
| **%FatMassDelta_HIGH.FAT** | **chr6_57.87** | **56.96** | **60.87** | **3.92** | **5.24** | **5.18** | **5.50** | **TATAAATT** | **6.71E-78** | **0.00142** | **0.000929** |
| LftKid/BW_LOW.FAT | chr7_106.166 | 104.66 | 106.3 | 1.63 | 5.44 | 5.19 | 5.53 | TCCTTTTC | 2.78E-10 | 0.00295 | 0.009794 |
| **Insulin0_LOW.FAT** | **chr12_1.65** | **0.10** | **2.74** | **2.64** | **5.33** | **5.23** | **5.57** | **CCCCCCTC** | **2.28E-12** | **0.00033** | **0.002724** |
| Gluc0_HIGH.FAT | chr15_73.74 | 72.08 | 74.1 | 2.02 | 5.29 | 5.27 | 5.61 | AGAGGGGA | 2.01E-42 | 2.64E-05 | 0.017091 |

Trait is listed followed by the diet condition under which the QTL was identified. Phenotype descriptions are provided in Supplementary Table 1. Separate QTL are distinguished by alternating bold vs regular type-face. SDP: Strain Distribution Pattern is based on the following order: ACI, BN, BUF, F344, M520, MR, WKY, WN.

**Table 5. Sex-specific phenotypic QTL**

| **Trait and Sex** | **Peak SNP (Chr_Mb)** | **Start (Mb)** | **End (Mb)** | **Size (Mb)** | **logP** | **thresh90** | **thresh95** | **SDP** | **p-value - sex** | **p-value - SNP** | **p-value: sex x SNP interaction** |
| --- | --- | --- | --- | --- | --- | --- | --- | --- | --- | --- | --- |
| Brain_M | chr1_104.01 | 101274674 | 104555430 | 3.28 | 5.99 | 5.13 | 5.45 | GGGGGGAA | 2.06E-147 | 0.00048 | 0.00160 |
| **ALT_F** | **chr1_216.33** | **215514376** | **217360858** | **1.85** | **5.2** | **5.14** | **5.48** | **AAGAAAAG** | **9.92E-30** | **0.00451** | **0.00091** |
| TRIG_M | chr1_258.53 | 258530115 | 260518967 | 1.99 | 5.91 | 5.17 | 5.49 | CCGCCGGG | 1.44E-129 | 6.65E-06 | 0.00122 |
| Insulin0_M | chr1_259.41 | 258530115 | 260518967 | 1.99 | 5.78 | 5.15 | 5.45 | CCACCCAC | 1.03E-254 | 0.00055 | 0.00179 |
| **LftKid/BW_F** | **chr1_97.98** | **97602399** | **98543678** | **0.94** | **5.24** | **5.22** | **5.56** | **CCAACCCA** | **3.51E-108** | **0.00045** | **0.00810** |
| AST_M | chr3_126.53 | 125319812 | 126677494 | 1.36 | 5.24 | 5.06 | 5.35 | TCCCCCCC | 8.29E-06 | 0.01143 | 6.38E-05 |
| **FatMass_F** | **chr3_129.78** | **129765076** | **131199489** | **1.43** | **5.59** | **5.07** | **5.38** | **CCTTTCTT** | **8.42E-173** | **0.00069** | **0.00145** |
| FattyLiver_M | chr3_168.20 | 167272172 | 168739418 | 1.47 | 5.43 | 5.25 | 5.62 | CCTTTCCT | 1.15E-72 | 0.00120 | 2.20E-05 |
| **Activity_Light_M** | **chr5_18.37** | **17185093** | **19037274** | **1.85** | **5.37** | **5.11** | **5.43** | **TTTCCCCT** | **0.00018** | **0.00013** | **0.00980** |
| FatMassYoung_M | chr6_105.96 | 105362840 | 106173474 | 0.81 | 5.29 | 5.18 | 5.50 | GAAAAAAA | 0.00139 | 0.00137 | 0.019013 |
| **Heart/BW_F** | **chr9_86.53** | **85819158** | **87032158** | **1.21** | **5.91** | **5.07** | **5.37** | **CAAAAAAA** | **8.50E-156** | **0.00117** | **0.02737** |
| AST_M | chr18_1.72 | 865139 | 2232456 | 1.37 | 5.42 | 5.06 | 5.35 | CCCCTCCC | 3.74E-06 | 0.00013 | 0.00135 |
| **FatMassYoung_M** | **chr19_30.81** | **30620969** | **30847156** | **0.23** | **5.23** | **5.18** | **5.50** | **CACAAACC** | **0.00106** | **0.00649** | **0.04118** |
| ALT_F | chr19_44.01 | 43822332 | 44513929 | 0.69 | 6.93 | 5.14 | 5.48 | CCACCCAC | 1.62E-29 | 0.00069 | 0.00013 |

Trait is listed followed by the sex under which the QTL was identified (Male: M, Female: F). Phenotype descriptions are provided in Supplementary Table 1. Separate QTL are distinguished by bold vs regular type-face, allowing visualization of pleiotropic QTL. SDP: Strain Distribution Pattern based on the following order: ACI, BN, BUF, F344, M520, MR, WKY, WN.

**Table 6. List of full mediators**

| **Trait** | **Peak SNP (Chr_Mb)** | **Hypothalamic Genes in pQTL** | **Hypothalamic cis eQTL within pQTL** | **Full Mediator** |
| --- | --- | --- | --- | --- |
| **BWDelta** | chr1_258949393 | 26 | 5 | ENSRNOG00000065260 |
| **Brain/BW** | chr1_259628230 | 26 | 5 | ENSRNOG00000065260 |
| **GonadalFat** | chr6_27064422 | 95 | 14 | Rbks |
| **GonadalFat/BW** | chr6_27064422 | 95 | 14 | Rbks |
| **FatMassDelta** | chr6_27013988 | 95 | 14 | Mpv17;Rbks;Pcare;Gpn1 |
| **%FatMassDelta** | chr6_23493841 | 95 | 14 | Pcare, Rbks |
| **LeanMass** | chr6_27013988 | 95 | 14 | Mpv17;Rbks;Pcare;Gpn1 |
| **LeanMassDelta** | chr6_27013988 | 95 | 14 | Mpv17;Rbks;Pcare |
| **OmenFat** | chr6_27064422 | 95 | 14 | Mpv17;Rbks;Pcare;Gpn1 |
| **OmenFat/BW** | chr6_27064422 | 95 | 14 | Mpv17;Rbks;Pcare;Gpn1 |
| **RetroFat** | chr6_27064422 | 95 | 14 | Mpv17;Rbks;Pcare |
| **RetroFat/BW** | chr6_27064422 | 95 | 14 | Mpv17;Rbks;Pcare |
| **OmenFat/BW** | chr9_703536 | 43 | 11 | Tnfsf9 |
| **Diet or sex-specific loci** |  |  |  |  |
| **Activity_Light_LOW.FAT** | chr4_153327254 | 11 | 6 | Ccdc77 |
| **FattyLiver_M** | chr3_168203623 | 47 | 5 | Polr3k;Rtel1 |

Phenotype descriptions are provided in Supplementary Table 1.
